# Supplementary material for: Cooperative target mRNA destabilization and translation inhibition by miR-58 microRNA family in C. elegans
Source: HighWire-hosted journal article supplement (doi:10.1101/gr.183160.114), 2015-07-31
Supplement: Supplemental_Table_1.xlsx [file Supplemental_Table_1.xlsx]

## Sheet: TargetScan targets
Gene public name	log2 fold change protein (mir-58.1 / WT)	log2 fold change protein (mir-80; mir-58.1 / WT)	log2 fold change protein (mir-80; mir-58.1; mir-81-82 / WT)	Protein quantification method	log2 fold change mRNA (mir-58.1 / WT)	log2 fold change mRNA (mir-80; mir-58.1 / WT)	log2 fold change mRNA (mir-80; mir-58.1; mir-81-82 / WT)	Conserved miR-58.1 site number predicted by TargetScan	Poorly conserved miR-58.1 site number predicted by TargetScan	Aggregate PCT miR-58.1 (Friedman et al., 2009)	Conserved miR-80/81/82 site number predicted by TargetScan	Poorly conserved miR-80/81/82 site number predicted by TargetScan	Aggregate PCT miR-80/81/82 (Friedman et al., 2009)
B0336.3	NA	0.268128	NA	SILAC fractionated	0.171586	0.48758	0.61907	2	1	> 0.99	2	1	> 0.99
C30B5.7	-1.23559	0.763427	5.37883	SRM	0.862416	0.344441	0.784888	1	0	0.89	1	0	0.89
C32E8.3	0.540676	0.417835	0.735497	SILAC fractionated	0.246956	0.51815	1.2405	1	0	0.91	1	0	0.91
C37H5.13	0.370559	1.11757	1.44419	SILAC fractionated	0.297732	1.03352	1.27145	1	0	0.93	1	0	0.95
C56G2.1	0.12632	0.181547	1.89607	SRM	0.16281	0.383202	0.43055	1	1	0.88	1	1	0.88
cah-5	0.272062	0.468005	0.816341	SILAC fractionated	0.331487	0.513892	0.438526	1	0	0.93	1	0	0.92
cgh-1	0.0854591	0.28446	0.331166	SILAC unfractionated	-0.167689	0.98403	0.970472	1	1	0.97	1	1	0.98
cids-1	0.102695	0.0314602	1.31586	SRM	0.0400773	0.585555	0.938289	1	0	0.84	NA	NA	NA
cra-1	0.141268	-0.0336153	0.292304	SILAC fractionated	0.442555	0.567821	0.433764	1	0	0.89	1	0	0.89
daf-21	0.132955	0.256455	0.389595	SILAC unfractionated	0.190231	0.603206	1.0295	1	0	0.91	1	0	0.91
dnj-20	0.466551	0.733552	0.617362	SILAC fractionated	0.705425	1.17756	1.12491	2	0	0.97	2	0	> 0.99
dpy-28	0.48726	1.1707	1.23377	SRM	0.575295	1.31743	1.53153	1	0	0.89	NA	NA	NA
elo-3	0.765426	0.192057	0.321688	SILAC fractionated	0.255244	0.524936	0.739841	1	0	0.93	1	0	0.93
F08G12.2	0.117669	1.18085	0.77565	SILAC fractionated	0.0378467	0.271447	0.589828	1	0	0.92	1	0	0.92
F13D12.6*	0.301985	0.659295	-0.222809	SRM	-0.011697	0.396965	0.415168	NA	NA	NA	NA	NA	NA
F26B1.2	0.0746015	0.265205	0.234335	SILAC fractionated	-0.034329	0.358049	0.422842	1	0	0.93	1	0	0.95
F27C1.2	1.19076	1.67575	1.1435	SRM	0.475512	0.858496	1.32146	1	2	0.98	1	2	0.97
F40F8.5*	1.33334	1.3192	4.02688	SRM	0.170968	0.475908	0.786656	NA	NA	NA	NA	NA	NA
F47B7.2	-0.538178	-0.580066	-1.13205	SRM	0.0394465	0.156388	0.159695	1	0	0.96	1	0	0.93
F56D3.1	0.419025	0.707819	0.187214	SRM	0.287959	0.67946	0.747162	1	0	0.96	1	0	0.93
F58E10.3	-1.12894	-0.926221	-0.985359	SILAC unfractionated	0.07627	0.320406	0.503256	1	0	0.91	1	0	0.91
F59A3.3	0.512274	0.646618	0.229981	SILAC fractionated	0.173895	0.524359	0.436425	1	0	0.6	1	0	0.89
fkb-6	-0.516466	-0.214833	0.735318	SILAC unfractionated	-0.312052	0.591507	1.19154	1	0	0.93	1	0	0.95
flh-2	-0.911227	1.46405	-0.643195	SRM	0.552826	1.30287	1.74448	1	0	0.96	1	0	0.96
gfl-1	NA	1.13708	NA	SRM	0.094509	0.613758	0.99918	1	0	0.88	1	0	0.93
gpb-1	0.51948	0.506325	0.524919	SILAC unfractionated	0.382038	0.384933	0.370962	1	0	0.91	1	0	0.91
his-72	0.405545	NA	NA	SILAC fractionated	0.386173	0.958726	1.36896	1	0	0.91	1	0	0.9
hmg-1.1	0.321715	0.257656	NA	SILAC unfractionated	-0.0101303	0.549478	0.965679	1	0	0.96	1	0	0.96
hsp-1	0.0799824	0.170819	0.223708	SILAC unfractionated	-0.0862059	0.110557	0.0353658	1	0	0.93	1	0	0.92
htz-1	0.341993	0.542797	0.686885	SILAC fractionated	0.164676	0.427037	0.608379	1	0	0.91	1	0	0.91
ife-3	0.235903	0.645615	0.647125	SRM	0.0945001	0.60841	0.657675	1	0	0.88	1	0	0.88
isw-1	0.466073	1.07043	0.945977	SRM	0.43982	1.12464	1.37823	1	1	0.94	1	1	0.98
ivd-1	0.155616	0.370605	0.44745	SILAC unfractionated	0.133837	0.476643	0.363524	1	0	0.87	1	0	0.74
K08F4.2	-0.273206	0.127173	0.165972	SILAC unfractionated	-0.0785009	0.459253	0.580911	1	0	0.91	1	0	0.91
lys-1	0.633636	0.952706	1.32525	SILAC unfractionated	0.611749	1.66641	2.21027	NA	NA	NA	1	0	0.14
lys-2	0.442225	0.740602	0.31409	SILAC fractionated	1.40006	2.65297	1.98711	NA	NA	NA	1	0	0.9
M28.8	0.505525	-1.5183	-0.334992	SRM	0.0312726	-0.0510685	-0.073946	1	0	0.91	1	0	0.91
mcm-3	0.0752385	-0.0960434	0.50262	SILAC fractionated	0.299025	0.801534	0.929801	1	0	0.89	1	0	0.91
mcm-7	0.405984	-0.153205	0.200669	SILAC fractionated	0.117453	0.421055	0.84409	1	0	0.96	1	0	0.93
mep-1	0.397374	0.649862	0.32898	SILAC fractionated	0.251417	0.726933	0.972465	1	1	0.95	1	1	0.95
osm-11	0.602478	0.697415	1.04854	SILAC fractionated	0.244455	0.151758	0.993639	1	0	0.91	1	0	0.91
pcn-1	0.181437	1.07167	0.984124	SILAC fractionated	0.213532	0.814727	1.15465	1	0	0.93	1	0	0.92
pgp-9	-0.111695	0.97784	1.10141	SILAC fractionated	0.435039	0.925292	1.01352	1	0	0.92	1	0	0.82
pqn-70	NA	0.478024	NA	SILAC fractionated	-0.197725	0.553122	1.00028	1	0	0.88	1	0	0.35
R09B3.3	-0.228468	-0.411409	-0.0850838	SILAC unfractionated	-0.0821357	0.408427	0.514715	1	0	0.92	1	0	0.92
R11A8.5	0.204379	0.429997	0.539091	SRM	0.262354	0.575726	0.506585	1	0	0.96	1	0	0.96
rnr-2	0.328612	0.332516	0.249314	SILAC fractionated	0.713199	0.964797	1.15923	1	0	0.82	NA	NA	NA
rpa-1	0.523789	1.27501	1.56039	SRM	0.445505	0.891704	1.03827	1	1	0.94	1	1	0.91
rsp-1	0.24485	0.407867	0.497629	SILAC fractionated	-0.0545663	0.291829	0.321305	1	0	0.95	1	0	0.95
snr-1	NA	0.451155	0.446946	SILAC fractionated	-0.00244133	0.118823	0.183963	NA	NA	NA	1	0	0.75
snr-3	0.241651	0.780964	0.496441	SILAC unfractionated	-0.0532747	0.205611	0.272507	1	0	0.91	1	0	0.16
snr-6	0.320133	0.722262	1.06456	SILAC unfractionated	-0.0853846	0.241595	0.240594	1	0	0.91	1	0	0.91
tag-170	0.253056	0.581656	0.467033	SILAC fractionated	0.124822	0.324716	0.566494	1	0	0.96	1	0	0.93
tag-297	-0.388196	0.0324392	0.357829	SILAC fractionated	-0.0108476	0.081463	0.424158	1	0	0.93	1	0	0.95
tag-342*	0.836559	NA	1.91984	SRM	-0.283889	0.550817	1.37261	NA	NA	NA	NA	NA	NA
tag-72	0.647383	0.385066	0.505718	SILAC fractionated	0.108987	0.508024	0.829402	NA	NA	NA	1	1	0.91
top-2	0.498301	0.642696	0.954931	SILAC fractionated	0.121103	0.926619	1.1517	1	0	0.92	1	0	0.89
ubq-1	0.157987	0.160374	0.315557	SILAC unfractionated	0.289169	0.603893	0.767025	1	0	0.94	1	0	0.91
unc-130	NA	NA	3.10074	SRM	0.392428	0.347687	1.29503	1	0	0.96	1	0	0.93
unc-45*	0.458905	0.632641	0.504866	SRM	0.000658577	0.0226002	-0.0267251	NA	NA	NA	NA	NA	NA
vbh-1	-0.314139	0.0148084	-0.369797	SILAC fractionated	0.134959	0.600293	0.561319	1	1	0.91	1	1	0.92
ZK418.9	0.794709	1.55466	0.758722	SRM	0.20248	0.573219	0.686121	1	0	0.8	1	0	0.89
ZK616.4	0.546703	1.20009	1.38261	SRM	0.392721	0.922498	1.28964	1	0	0.9	1	0	0.86
* - Targets predicted by an earlier version of TargetScan 5.1 (April 2009) for which PCT scores are not available

## Sheet: MIRZA non-canonical targets
Gene public name	MIRZA score non-canonical sites	miRNA	log2 fold change protein (mir-58.1 / WT)	log2 fold change protein (mir-80; mir-58.1 / WT)	log2 fold change protein (mir-80; mir-58.1; mir-81-82 / WT)	Protein quantification method	log2 fold change mRNA (mir-58.1 / WT)	log2 fold change mRNA (mir-80; mir-58.1 / WT)	log2 fold change mRNA (mir-80; mir-58.1; mir-81-82 / WT)	miRNA:mRNA hybrid	MIRZA scores for genes containing canonical sites
hmg-3	55.044	cel-miR-82	0.446768	0.268169	0.523587	SILAC unfractionated	-0.500918	0.651329	0.715469	UGAGAUCAUCGUGAAAGCCAG	NA
										#||||||OOO^^||||OOOO|
										tctctagata--ctttcattc
alg-1	51.5597	cel-miR-80	0.248529	0.269602	0.331118	SILAC unfractionated	0.326166	0.309623	0.465252	UGA--GAUCAUU------AGUUGAAAGCC	50.7364
										|||vv|||||OOvvvvvv||||||^||##
										actgtctagttcgggcattcaact-tctt
his-41	46.3171	cel-miR-80	0.170808	0.460026	0.68268	SILAC fractionated	0.653833	1.41583	2.12539	UGAGAUCAUUAGUUGAAAGCC	55.8504
										#||||||^^^^^||||||###
										tctctag-----aacttttat
K07H8.3	40.8287	cel-miR-80	-0.260848	-0.0732875	-0.203428	SILAC unfractionated	-0.0790574	-0.0506154	-0.121288	UGAGAUCAUUAGUUGAAAGCC	NA
										#||||||OOOO^^||||||##
										tctctaggagg--actttccc
mlc-3	38.2805	cel-miR-80	0.217023	-0.0208184	-0.103496	SILAC fractionated	0.0284874	-0.204584	-0.397785	UGAGAUCAUUAGUUGAA--AGCC	NA
										|||||||OOOOOOOOOOvv||##
										actctaggttataaatgaatctg
C15C7.5	31.808	cel-miR-80	-0.413603	-0.762488	-0.457184	SILAC unfractionated	-0.349786	-0.661756	-0.484411	UGA--GAUCAUUAGUUGAAAGCC	NA
										#||vv|||||OOOO||||||###
										gcttgctagtttcgaacttttct
C56G2.7	30.9346	cel-miR-80	-0.00924488	0.424945	-0.0273294	SILAC unfractionated	-0.0491719	-0.12819	-0.0634302	UGAGAUCAUUAGUUGAA----AGCC	NA
										|||||||OO^^^^|||Ovvvv||##
										actctaggt----actcgagctcaa
mec-7	29.2335	cel-miR-82	0.50971	0.296401	0.474363	SILAC unfractionated	0.449052	0.27497	0.265817	UGAGAUCAUCGUGAAAGCCA--G	NA
										|||||||OOOOO||||OOOOvv|
										actttaggggtactttttttttc
F48E3.3	28.4489	cel-miR-80	-0.0629758	-0.145348	-0.139677	SILAC unfractionated	0.17797	-0.121014	-0.283619	UGAGA-UCAUUAGUUGAAAGCC	NA
										|||||v|||OOOOOOOO^||##
										actctcagtagtaaaag-tctt
lin-53	28.0462	cel-miR-81	0.259416	0.306237	0.415569	SILAC unfractionated	0.278716	0.421793	0.498967	UGAGAU-CAUCGUGAAAGCUAG	NA
										||||||v||^^^^^|||O^||#
										actctacgt-----ttta-att
mrg-1	26.9247	cel-miR-80	0.341453	0.606686	0.566219	SILAC unfractionated	0.230576	0.626192	0.759362	UGAGA-UCAUUAGUUGAAAGCC	203.565
										|||||v|||OOOOOOOO^||##
										actcttagtataagtaa-tctt
dcap-1	26.3301	cel-miR-80	0.429379	0.272967	0.435029	SILAC unfractionated	0.0140912	0.238013	0.406331	UGAG--AUCAUUAGUUGAAAGCC	NA
										||||vv||||OOOOOOOOO||##
										actctatagtagttatccctctg
lst-3	26.1385	cel-miR-80	0.623768	0.850353	1.15403	SILAC unfractionated	-0.0228338	0.44611	0.506239	UGAGAUCAUUAGUUGAAAGCC	NA
										##|||||||||O|||O^||##
										tatctagtaattaaca-tctc
cyn-7	25.1288	cel-miR-80	-0.28809	0.135972	0.148955	SILAC fractionated	-0.207967	-0.0498051	-0.0928813	UGA-GAUCAUUAGUUGAAAGCC	NA
										|||v|||||OOO^^|||||###
										actactagttct--actttttc
mcm-2	23.3802	cel-miR-82	-0.200965	0.120654	0.395416	SILAC unfractionated	0.318329	0.778939	0.741491	UGAG-AUCAUC------GUGAAAGCCAG	NA
										||||v||||OOvvvvvv||||||OOOO|
										actcatagtcttcgtgccacttttagcc
K10D3.4	23.015	cel-miR-82	-0.052482	-0.206733	-0.134412	SILAC unfractionated	0.591139	0.697821	0.603223	UGAGAUCAUCGUGAAAGCCAG	NA
										||||||OOO^^^||||OO^^|
										actctaccg---cttttt--c
dnj-11	22.4172	cel-miR-80	-0.31279	-0.0737041	-0.203161	SILAC unfractionated	0.00237097	0.216409	0.123705	UGAGAUCAUUAGUUGAAAGCC	NA
										#|||||OO^^^^||||||###
										gctctatg----aactttgct
cpf-2	22.1156	cel-miR-80	0.349346	0.392875	0.765386	SILAC unfractionated	-0.0671686	0.296839	0.495825	UGAGAUCAUUAG----UUGAAAGCC	NA
										#||||||OOOOOvvvv||||^^^^|
										gctctaggtataaatgaact----g
nas-37	21.4144	cel-miR-82	-0.0478644	-0.0543454	-0.132519	SILAC unfractionated	0.694251	0.758374	0.508716	UGAG----AUCAUCGUGAAAGCCAG	NA
										||||vvvv||||OOOOOOOOOOO^|
										actcgttatagtttgcacacccc-c
icd-1	21.3939	cel-miR-80	0.248646	0.47664	0.117899	SILAC fractionated	0.0695266	0.0170826	0.353738	UGAGA-UCAUUAGUUGAAAGCC	89.2393
										#||||v|||^^^^||||||###
										tctctaagt----aactttag-
F13C5.2	20.4756	cel-miR-80	1.06903	0.607153	1.17361	SILAC unfractionated	0.0985745	0.124573	0.398994	UGAGA-UCAUUAGUUG-AAAGCC	NA
										|||||v|||OOOOOOOv||||##
										actctaagtattatgtttttc--
F58B3.6	20.0799	cel-miR-80	0.656547	0.632481	0.504132	SILAC unfractionated	0.423007	0.45082	0.765702	UGAGAUCAUUAG-----------UUGAAAGCC	NA
										##||||||OOOOvvvvvvvvvvv|||||||##
										aatctagtcgttatattagtattaactttctc
lpr-4	19.1121	cel-miR-58.1	0.435651	0.100796	-0.297635	SILAC unfractionated	0.685826	1.12636	1.20521	UGAGAUCGUUCA-GUACGGCAA	NA
										#|||||OOOOOOv|||||||##
										gctctactgtcagcatgccgcg
hmg-4	18.7634	cel-miR-80	0.446768	0.268169	0.523587	SILAC unfractionated	0.464654	0.893276	1.10999	UGAGA---UCAUUAG--UUGAAAGCC	NA
										|||||vvv|||OOOOvv||||OOOO|
										actctataagtctgttgaactctatg
C25A1.4	18.1354	cel-miR-80	-0.425385	-0.0263357	-0.146189	SILAC unfractionated	-0.0175188	0.237034	0.282623	UGAGAUCAUUAGUUGAA-AGCC	NA
										||||||OOOO^^||||Ov||##
										actctaaggc--aactgttcct
emb-5	17.5873	cel-miR-80	-0.350064	-0.0784511	0.23002	SILAC unfractionated	0.504095	0.72531	0.803667	UGAGAUCAUUAGUUGAAAGCC	43.7846
										##||||||OOO^||||O||##
										aatctagtagc-aactatctg
lam-2	17.4233	cel-miR-58.1	0.35943	0.258432	0.506302	SILAC unfractionated	0.522005	0.692751	0.56385	UGAGA--UCGUUCAGUACGGCAA	NA
										|||||vv|||OOOOOOOOOO^^|
										actctaaagcctattgtttt--t
his-24	17.292	cel-miR-80	0.834538	0.295145	1.00041	SILAC unfractionated	0.0137134	1.15808	1.26945	UGAGAUCAUUAGUUGAAAGCC	NA
										#||||||OOOOOOOOO^||##
										cctctaggctattcaa-tcta
C05G5.4	17.2105	cel-miR-80	-0.0441195	0.134815	0.215992	SILAC fractionated	0.0451937	-0.0869672	-0.214791	UGAGA--UCAUUAG----UUGAAAGCC	NA
										#||||vv|||OOOOvvvv||||||###
										tctcttcagtatctttataactttaat
B0495.7	17.1218	cel-miR-80	-0.241109	-0.119765	-0.23682	SILAC fractionated	-0.0573976	-0.254395	-0.278456	UGAGA-UCAUUAGUUGAAAGCC	NA
										|||||v|||O^^^^^^||||##
										actcttagtg------tttctt
math-33	16.4945	cel-miR-82	0.303591	0.346598	0.226132	SILAC unfractionated	0.296483	0.692846	0.736951	UGAGA-----UCAUCGUG-AAAGCCAG	NA
										|||||vvvvv|||OOOOOv|||||###
										actctttgttagtatattgtttcgtca
myo-2	15.6359	cel-miR-80	0.24163	0.03021	0.0553397	SILAC fractionated	0.191199	0.270944	0.102358	UGAG---------AUCAUUAGUUGAAAGCC	NA
										||||vvvvvvvvv||||O^^^||||^||##
										actcttcacagcttagtt---aact-tcgt
H34C03.2	15.3293	cel-miR-58.1	-0.212564	-0.253575	-0.313838	SILAC unfractionated	0.227733	0.470543	0.380699	UGAGA-UCGUUCAGUACGGCAA	31.9879
										#||||v|||OOOOO|||OOO^|
										cctcttagcaaaggatgggc-t
mbf-1	14.9852	cel-miR-82	-0.41623	-0.166223	-0.0504431	SILAC unfractionated	-0.281491	-0.342134	-0.226168	UGAGAU---CAUCGUGAAAGCCAG	NA
										#|||||vvv||O^^^||||OOOO|
										tctctatgggtt---cttttgtcc
abcf-2	14.9544	cel-miR-58.1	-0.197772	-0.0872705	-0.325759	SILAC unfractionated	0.233694	0.384708	0.672506	UGAGAUCGUUCAGUACGGCAA	NA
										#|||||OOOOOOOOOOOOOO|
										cctttatccttattcttttgt
csn-4	14.4302	cel-miR-80	-0.0985507	0.491775	0.417582	SILAC unfractionated	0.052526	0.155265	0.167723	UGAGA--UCAUUAGUUGAAAGCC	NA
										|||||vv|||OOO^^^||||###
										actctaaagtgtt---ctttttt
ile-2	14.4301	cel-miR-82	0.0326963	-0.276431	-0.26481	SILAC unfractionated	-0.113734	-0.266156	-0.268829	UGAG----AUCAUCGUGAAAGCCAG	NA
										||||vvvv||||O^^^^|||OO||#
										actcattttagtt----ttttagtg
nex-2	13.5975	cel-miR-80	0.241895	0.440204	0.511896	SILAC unfractionated	0.345561	0.813415	1.31652	UGAGAU--CAUUAG----UUGAAAGCC	134.567
										||||||vv||OOOOvvvv||||||###
										actctaacgtacaacaataatttttac
F37C4.5	13.4549	cel-miR-80	0.166568	0.233236	0.290135	SILAC fractionated	-0.24281	-0.0381387	0.155267	UGAGAUCAUUAGUUGAAAGCC	NA
										##||||||OOOO^^^||||##
										tgtctagttcaa---tttcgc
F09G2.9	13.0886	cel-miR-80	0.134103	0.429999	0.0591737	SILAC unfractionated	-0.273066	0.160166	0.261104	UGAGAUCAUUAGUUGAAAGCC	14.1034
										||||||OOOOOOOOO||||##
										actctaactaaatcttttctg
H13N06.4	12.9886	cel-miR-58.1	0.214827	0.705828	0.904027	SILAC unfractionated	0.22741	0.435207	0.485993	UGAGAUCGUUCAGUACGGCAA	NA
										#||||||OOO^^^^||||###
										gctctagact----tgcctta
elb-1	12.9747	cel-miR-80	0.0826718	-0.122443	-0.203215	SILAC unfractionated	-0.00625253	-0.0387002	0.0399231	UGAGAUCAUUAGUUGAA-AGCC	NA
										#||||||OOOOO|||OOv||##
										tctctagatgagaacacctcgg
F33D11.10	12.6517	cel-miR-80	0.0482266	0.149838	0.289202	SILAC unfractionated	0.37582	0.585733	0.740924	UGAGAUCAUUAGUUGAAAGCC	NA
										#||||||O^^^^|||O^||##
										cctctaga----aaca-tcct
H17B01.4	12.1383	cel-miR-82	0.660728	0.151344	0.500489	SILAC unfractionated	0.12284	0.268264	0.224761	UGAGAUCAUCGUGAAAGCCAG	NA
										||||||OOOO^^^|||OOO^|
										actctaaaag---tttacc-c
C18B2.5	12.1282	cel-miR-80	0.320707	-0.280675	-0.134687	SILAC unfractionated	0.0965493	-0.434926	-0.366733	UGAGAUCAUUAGUUGAAAGCC	14.1657
										#|||||OOOO^^||||||###
										cctctaattt--aactttgg-
F30H5.3	12.004	cel-miR-80	-0.135752	-0.548671	-0.3996	SILAC unfractionated	0.500532	0.593164	0.596907	UGAGAU-----------------CAUUAGUUGAAAGCC	NA
										#|||||vvvvvvvvvvvvvvvvv||OOOO|||||||##
										tctctacgtttttgtccagtagtgtaacaaactttctt
K12H4.3	11.9265	cel-miR-82	-0.235075	-0.369411	-0.402939	SILAC unfractionated	0.116178	-0.0335125	-0.0182024	UGAGAUCAUCGUGAAAGCCAG	NA
										||||||OO^^^^^|||OO||#
										actctatt-----ttttagtt
eif-6	11.8163	cel-miR-80	-0.105156	-0.0131518	-0.184524	SILAC fractionated	-0.172817	-0.18327	-0.170186	UG--AGAUCAUUAGUUGAAAGCC	NA
										||vv||||||OOOOOOO^^||##
										accatctagttttttta--tcac
emb-4	11.508	cel-miR-80	0.31879	0.156913	0.406158	SILAC unfractionated	0.363319	0.571077	0.405199	UGAGAUCAUUAGUUGAA-AGCC	NA
										##||||||OOOO||||Ov||##
										--tctagtattaaactactctc
mpk-1	11.2676	cel-miR-58.1	1.1477	1.0293	0.710715	SILAC unfractionated	0.262455	0.607199	0.715194	UGAGAUCGUUCAGUACGGCAA	45.7775
										#||||||OOOOOOOOOOOOO|
										cctctagggtgtatcctactt
haf-9	11.0937	cel-miR-82	0.0867055	-0.0320216	0.177356	SILAC unfractionated	0.18567	-0.363982	-0.428213	UGAGAUCAUCGUGAAAGCCAG	NA
										##||||||O^^^||||^^||#
										tatctagtt---cttt--gta
ftt-2	10.9392	cel-miR-80	0.420476	0.362968	0.493292	SILAC fractionated	0.22524	0.193678	0.342825	UGAGAUCAUUAGUUGAAAGCC	NA
										#|||||^^^^^^|||||||##
										gctcta------aactttccc
grd-14	10.9377	cel-miR-80	-0.379677	-0.232496	0.657683	SILAC unfractionated	-0.49666	-0.865242	-1.21959	UGAGAUCAUUAGUUGAAAGCC	NA
										#||||||OOO^^||||||###
										tttctagaac--aacttttca
gst-1	10.8979	cel-miR-81	0.07243	0.0035619	0.224686	SILAC fractionated	0.164652	0.123996	0.175007	UGAGA-UCAUCGUGAAAGCUAG	NA
										#||||v|||OOOO^^|||||##
										tctctaagtaacc--ttcgaaa
nmt-1	10.7266	cel-miR-82	0.316912	0.339736	0.107155	SILAC fractionated	-0.0232342	0.0391746	0.0163947	UGAGAU----CAUCGU-GAAAGCCAG	NA
										#|||||vvvv||OOOOv||||^^^^|
										cctctatatagtttttgcttt----c
hum-4	10.3795	cel-miR-80	-0.212585	-0.0155639	-0.117406	SILAC unfractionated	0.588432	0.260567	0.0342903	UGAGAUCAU----------UAGUUGAAAGCC	NA
										||||||OOOvvvvvvvvvv||||||||||##
										actctacttcaatacttatatcaattttcga
ifd-1	10.1916	cel-miR-58.1	0.349227	-0.0597561	0.199504	SILAC unfractionated	0.367246	-0.674527	-0.666284	UGAG-AUCGUUCAGUACGGCAA	12.9953
										#|||v||||O^^^|||OOOO^|
										gctcgtagcg---cattgtt-t
F58G11.2	10.0617	cel-miR-80	0.024951	0.290393	0.518506	SILAC unfractionated	0.245775	0.710211	0.997541	UGA--GAUCAUUAG----UUGAAAGCC	59.0162
										|||vv|||||OOOOvvvv||||O|###
										actaactagtacggtcttaactattaa

## Sheet: Alt. MIRZA hybrid examples
Gene public name	MIRZA score non-canonical sites	miRNA	log2 fold change protein (mir-58.1 / WT)	log2 fold change protein (mir-80; mir-58.1 / WT)	log2 fold change protein (mir-80; mir-58.1; mir-81-82 / WT)	Protein quantification method	log2 fold change mRNA (mir-58.1 / WT)	log2 fold change mRNA (mir-80; mir-58.1 / WT)	log2 fold change mRNA (mir-80; mir-58.1; mir-81-82 / WT)	miRNA:mRNA hybrid (MIRZA score > 10)	MIRZA scores for genes containing canonical sites	Alternative miRNA:mRNA hybrid with the highest MIRZA score	Target / miRNA / MIRZA score	Alternative miRNA:mRNA hybrid with the highest MIRZA score	Target / miRNA / MIRZA score	Alternative miRNA:mRNA hybrid with the highest MIRZA score	Target / miRNA / MIRZA score
mec-7	29.2335	cel-miR-82	0.50971	0.296401	0.474363	SILAC unfractionated	0.449052	0.27497	0.265817	UGAGAUCAUCGUGAAAGCCA--G	NA	UGA------GAUCGUUCAGUACGGCAA	mec-7
										|||||||OOOOO||||OOOOvv|		|||vvvvvv|||||OOOOOO^^^^^^|	cel-miR-58.1
										actttaggggtactttttttttc		actatattgttagctagtta------t	0.16822
lin-53	28.0462	cel-miR-81	0.259416	0.306237	0.415569	SILAC unfractionated	0.278716	0.421793	0.498967	UGAGAU-CAUCGUGAAAGCUAG	NA	UGAGAU---CAUUAG-UUGAAAGCC	lin-53
										||||||v||^^^^^|||O^||#		||||||vvv||OOOOv||||#####	cel-miR-80
										actctacgt-----ttta-att		attctacttgttaaacaact-----	0.341033
dcap-1	26.3301	cel-miR-80	0.429379	0.272967	0.435029	SILAC unfractionated	0.0140912	0.238013	0.406331	UGAG--AUCAUUAGUUGAAAGCC	NA	UGAGAUCAUCGUGAAAGCUAG	dcap-1	UGAGAUCGUUCAGUACGGCAA	dcap-1	UGAGAUCAUCGUGAAAGCCAG	dcap-1
										||||vv||||OOOOOOOOO||##		#|||||OO^^^^||||O^||#	cel-miR-81	#|||||OOOOOOOOO^^||##	cel-miR-58.1	#|||||OOOOO^||||OOOO|	cel-miR-82
										actctatagtagttatccctctg		tttttacc----cttta-att	1.60599	cttttaaaaacctcc--cgcc	1.41632	tttttatctcc-cttttaccc	1.28703
lst-3	26.1385	cel-miR-80	0.623768	0.850353	1.15403	SILAC unfractionated	-0.0228338	0.44611	0.506239	UGAGAUCAUUAGUUGAAAGCC	NA	UGAGAUCGUUCAG-------UACGGCAA	lst-3
										##|||||||||O|||O^||##		##||||OOOOOOOvvvvvvv|||||###	cel-miR-58.1
										tatctagtaattaaca-tctc		aatctatataataccaataaatgccctg	0.0257718
mcm-2	23.3802	cel-miR-82	-0.200965	0.120654	0.395416	SILAC unfractionated	0.318329	0.778939	0.741491	UGAG-AUCAUC------GUGAAAGCCAG	NA	UGAGAUCAUUAGUUGAAAGCC	mcm-2
										||||v||||OOvvvvvv||||||OOOO|		#||||||OO^^^||||O^^^|	cel-miR-80
										actcatagtcttcgtgccacttttagcc		cttttagag---aactt---g	0.363683
cpf-2	22.1156	cel-miR-80	0.349346	0.392875	0.765386	SILAC unfractionated	-0.0671686	0.296839	0.495825	UGAGAUCAUUAG----UUGAAAGCC	NA
										#||||||OOOOOvvvv||||^^^^|
										gctctaggtataaatgaact----g
F13C5.2	20.4756	cel-miR-80	1.06903	0.607153	1.17361	SILAC unfractionated	0.0985745	0.124573	0.398994	UGAGA-UCAUUAGUUG-AAAGCC	NA	UGAGAU-CAUUAGUUGAA---AGCC	F13C5.2	UGAGAU------CAUCGUGAAAGCUAG	F13C5.2
										|||||v|||OOOOOOOv||||##		#|||||v||OOOO|||OOvvv||##	cel-miR-58.1	#|||||vvvvvv||O^^^^|||||###	cel-miR-81
										actctaagtattatgtttttc--		tctctacgtatgtaaccaggttcaa	3.1463	cttttaacaaatgtt----tttcgccg	1.22755
F58B3.6	20.0799	cel-miR-80	0.656547	0.632481	0.504132	SILAC unfractionated	0.423007	0.45082	0.765702	UGAGAUCAUUAG-----------UUGAAAGCC	NA	UGA----GAU---CAUCGUGAAAGCUAG	F58B3.6
										##||||||OOOOvvvvvvvvvvv|||||||##		#||vvvv|||vvv||OO^^||||OOO^|	cel-miR-81
										aatctagtcgttatattagtattaactttctc		gctttcactgattgtta--ctttttt-c	0.878157
hmg-4	18.7634	cel-miR-80	0.446768	0.268169	0.523587	SILAC unfractionated	0.464654	0.893276	1.10999	UGAGA---UCAUUAG--UUGAAAGCC	NA	UGAG----AUCAUCGUGAAAGCUAG	hmg-4	UGAGAUCAUCGUGAAAGCCAG	hmg-4
										|||||vvv|||OOOOvv||||OOOO|		#|||vvvv||||O^^^^|||OO||#	cel-miR-81	##|||||^^^^^^^^^^^||#	cel-miR-82
										actctataagtctgttgaactctatg		tttcacgttagtt----ttttaatt	0.705916	agtctag-----------gta	0.191638
lam-2	17.4233	cel-miR-58.1	0.35943	0.258432	0.506302	SILAC unfractionated	0.522005	0.692751	0.56385	UGAGA--UCGUUCAGUACGGCAA	NA	UGA---GAUCAUCGUGAAAGCUAG	lam-2	UGA----------GAUCAUUAGUUGAAAGCC	lam-2	UGAGAUCAUCGUGAAAGCCAG	lam-2
										|||||vv|||OOOOOOOOOO^^|		#||vvv|||||^^^^^|||^|||#	cel-miR-81	|||vvvvvvvvvv|||||^^^^^^^^^||##	cel-miR-80	#|||||OOOOO^||||OOO^|	cel-miR-82
										actctaaagcctattgtttt--t		tcttaattagt-----ttt-gatt	1.67266	actcggttgttaactagt---------tcag	0.83327	gttttattatc-ctttctt-c	0.175276
his-24	17.292	cel-miR-80	0.834538	0.295145	1.00041	SILAC unfractionated	0.0137134	1.15808	1.26945	UGAGAUCAUUAGUUGAAAGCC	NA	UGAGAUCGUUCAG--UACG-GCAA	his-24	UGAGAUCAUCGUGAAAGCCAG	his-24	UGAGA---------UCAUCGUG--AAAGCUAG	his-24
										#||||||OOOOOOOOO^||##		||||||OOOOOOOvv|||Ov|||#	cel-miR-58.1	#|||||OO^^^^||||^^||#	cel-miR-82	#||||vvvvvvvvv|||OOOOOvv|||OOO^|	cel-miR-81
										cctctaggctattcaa-tcta		actctatttattaatatggtcgta	4.81441	tctttaac----cttt--gtt	0.523238	cttctgcaacttgcagtttaatagtttaaa-c	0.140715
H13N06.4	12.9886	cel-miR-58.1	0.214827	0.705828	0.904027	SILAC unfractionated	0.22741	0.435207	0.485993	UGAGAUCGUUCAGUACGGCAA	NA	UGAGAUCAUCGUG-AAAGCUAG	H13N06.4	UGA-------GAUCAUCGU-GAAAGCCAG	H13N06.4	UGAGAUCAUUAGUUGAAAGCC	H13N06.4
										#||||||OOO^^^^||||###		||||||OOOOOOOv|||OO^^|	cel-miR-81	|||vvvvvvv|||||OOOOv|||OOO^^|	cel-miR-82	#||||||O^^^^|||||####	cel-miR-80
										gctctagact----tgcctta		actctattctcctatttaa--c	3.85628	actgcaaggcctagtaacctcttacg--c	2.58301	cttctagg----aacttaaaa	1.54697
H17B01.4	12.1383	cel-miR-82	0.660728	0.151344	0.500489	SILAC unfractionated	0.12284	0.268264	0.224761	UGAGAUCAUCGUGAAAGCCAG	NA	UGAGAUCAUCGUGAAAGCUAG	H17B01.4	UGAG----------AUCAUUAGU-----UGAAAGCC	H17B01.4
										||||||OOOO^^^|||OOO^|		#|||||OOOO^^^|||O^||#	cel-miR-81	||||vvvvvvvvvv||||OOOOOvvvvv|||||###	cel-miR-80
										actctaaaag---tttacc-c		tctctatata---ttta-ata	1.35559	acttgagcgttaaatagtgaaaaaccttactttttg	0.228888
ftt-2	10.9392	cel-miR-80	0.420476	0.362968	0.493292	SILAC fractionated	0.22524	0.193678	0.342825	UGAGAUCAUUAGUUGAAAGCC	NA	UGAGAUCAUCGUGAAAGCUAG	ftt-2	UGA--GAUCGUUCAGUACGGCAA	ftt-2	UGAGAUCAUCGUG-AAAGCCAG	ftt-2
										#|||||^^^^^^|||||||##		#|||||OOO^^^|||^^^||#	cel-miR-81	|||vv||||OOO^^^^^^^^^^|	cel-miR-58.1	##||||||OOOOOv|||OO^^|	cel-miR-82
										gctcta------aactttccc		tttttgtgg---ctt---att	1.53322	actgtctagaaa----------t	1.18347	tatttagtatactgtttat--c	1.12156
hmg-3	55.044	cel-miR-82	0.446768	0.268169	0.523587	SILAC unfractionated	-0.500918	0.651329	0.715469	UGAGAUCAUCGUGAAAGCCAG	NA
										#||||||OOO^^||||OOOO|
										tctctagata--ctttcattc
csn-4	14.4302	cel-miR-80	-0.0985507	0.491775	0.417582	SILAC unfractionated	0.052526	0.155265	0.167723	UGAGA--UCAUUAGUUGAAAGCC	NA	UGAGA---UCAUCGU----GAAAGCUAG	csn-4	UGAGAUCGUUCAGUACGGCAA	csn-4
										|||||vv|||OOO^^^||||###		#||||vvv||OOOOOvvvv||||#####	cel-miR-81	#||||||OOOOOOOOOO^^^|	cel-miR-58.1
										actctaaagtgtt---ctttttt		gctcttaaagcttaaaaagctttttttt	1.94029	cttttaggccaaaaatt---t	1.60575
emb-4	11.508	cel-miR-80	0.31879	0.156913	0.406158	SILAC unfractionated	0.363319	0.571077	0.405199	UGAGAUCAUUAGUUGAA-AGCC	NA	UGAGAUCAUCGUGAAAGCUAG	emb-4	UGAGAU--CAUCGUGAAAGCCAG	emb-4
										##||||||OOOO||||Ov||##		#||||||OOOO^||||OO|##	cel-miR-81	#|||||vv||^^^^||||OOOO|	cel-miR-82
										--tctagtattaaactactctc		tttttagcatc-cttttaagt	1.43055	cttttaacgt----ctttttagc	1.19488
grd-14	10.9377	cel-miR-80	-0.379677	-0.232496	0.657683	SILAC unfractionated	-0.49666	-0.865242	-1.21959	UGAGAUCAUUAGUUGAAAGCC	NA	UGA--GAUCGUUCAGUACGGCAA	grd-14
										#||||||OOO^^||||||###		#||vv|||OOOOOOOOOO^||||	cel-miR-58.1
										tttctagaac--aacttttca		cctcactacttgtcaaaa-cgtt	1.13811
* log2 fold change protein (mir-80; mir-58.1; mir-81-82 / WT) ≥ 0.3, no presence of canonical sites -> filter for considering alternative hybrids
* log2 fold change protein ≥ 0.05 between different miR-58 family mutants - > additivity criteria

## Sheet: ALG-1 bound miR-58 targets
Gene public name	Sequence read number ligated miRNA:mRNA chimeras (Grosswendt et al. 2014)	log2 fold change protein (mir-58.1 / WT)	log2 fold change protein (mir-80; mir-58.1 / WT)	log2 fold change protein (mir-80; mir-58.1; mir-81-82 / WT)	Protein quantification method	log2 fold change mRNA (mir-58.1 / WT)	log2 fold change mRNA (mir-80; mir-58.1 / WT)	log2 fold change mRNA (mir-80; mir-58.1; mir-81-82 / WT)	miR-80/81/82 predicted target by TargetScan	miR-58.1 predicted target by TargetScan	Non-canonical targets predicted by MIRZA
alg-1	10	0.248529	0.269602	0.331118	SILAC unfractionated	0.326166	0.309623	0.465252	NA	NA	x
cts-1	6	0.14855	0.266959	0.256565	SILAC fractionated	0.109621	0.103318	-0.0369498	NA	NA	NA
dnj-20	6	0.466551	0.733552	0.617362	SILAC unfractionated	0.705425	1.17756	1.12491	x	x	NA
eef-1A.2	17	-0.0322115	0.16195	0.131351	SILAC fractionated	NA	NA	NA	NA	NA	NA
F44E5.4	48	-0.054223	0.0571553	0.157491	SILAC fractionated	NA	NA	NA	NA	NA	NA
F57B10.3	8	-0.201271	-0.262618	0.0160925	SILAC fractionated	0.331126	0.0218375	-0.0539752	NA	NA	NA
gei-7	6	0.0520462	-0.331084	-0.7224	SILAC fractionated	0.322793	0.509279	0.58103	NA	NA	NA
gpd-2	44	0.291404	0.416176	0.328712	SILAC fractionated	0.356874	0.463772	0.478875	NA	NA	NA
gpd-3	7	0.291404	0.416176	0.328712	SILAC fractionated	0.198134	-0.038579	-0.199801	NA	NA	NA
gst-1	14	0.0093014	0.23571	0.386124	SILAC fractionated	0.164652	0.123996	0.175007	NA	NA	x
his-24	6	0.834538	0.295145	1.00041	SILAC unfractionated	0.0137134	1.15808	1.26945	NA	NA	x
hmg-1.1	9	0.231204	0.578984	0.87809	SILAC unfractionated	-0.0101303	0.549478	0.965679	x	x	NA
inf-1	6	0.0800761	0.0574836	0.203793	SILAC fractionated	-0.0111822	-0.153918	-0.301459	NA	NA	NA
R05G6.7	6	0.138398	0.213815	0.30699	SILAC fractionated	-0.0463675	-0.211716	-0.297295	NA	NA	NA
T21C9.3	7	0.26163	0.245875	0.737684	SILAC unfractionated	0.213698	0.312314	0.155387	NA	NA	NA
ubq-1	8	0.157987	0.160374	0.315557	SILAC fractionated	0.289169	0.603893	0.767025	x	x	NA
clec-1	62	NA	NA	NA	NA	0.245227	1.10188	2.51949	NA	NA	NA
B0361.9	11	NA	NA	NA	NA	0.479655	0.734386	2.13949	x	x	NA
nhr-19	6	NA	NA	NA	NA	0.621161	0.810201	1.38849	NA	NA	NA
lin-1	6	NA	NA	NA	NA	0.467624	0.998016	1.34129	x	x	NA
K02D7.5	7	NA	NA	NA	NA	0.165624	0.900149	1.26876	NA	x	NA
mnk-1	11	NA	NA	NA	NA	0.497282	0.97367	1.20607	NA	NA	NA
nipi-3	9	NA	NA	NA	NA	0.579342	0.566948	1.13367	NA	NA	NA
C39E9.8	7	NA	NA	NA	NA	0.00933402	0.183369	1.08711	NA	NA	NA
cki-2	6	NA	NA	NA	NA	-0.0983332	0.687476	1.01617	NA	NA	NA
F46G10.2	6	NA	NA	NA	NA	0.334124	0.646285	1.01119	x	NA	NA
C06G8.1	6	NA	NA	NA	NA	0.611735	1.5652	0.97871	NA	NA	NA
lgg-1	7	NA	NA	NA	NA	0.136274	0.41404	0.913646	NA	NA	NA
C50B8.1	10	NA	NA	NA	NA	0.0278364	0.586146	0.879618	x	NA	NA
ZK470.2	25	NA	NA	NA	NA	0.233818	0.60536	0.876445	x	x	NA
W09D10.4	6	NA	NA	NA	NA	0.447536	0.66422	0.666424	NA	NA	NA
epc-1	7	NA	NA	NA	NA	0.32165	0.544401	0.599143	NA	NA	NA
F55H12.2	20	NA	NA	NA	NA	-0.404759	0.199112	0.587825	NA	NA	NA
F57G12.1	12	NA	NA	NA	NA	0.570618	0.383189	0.532437	NA	NA	NA
mdl-1	7	NA	NA	NA	NA	0.257981	0.303427	0.499856	NA	NA	NA
F18E3.11	39	NA	NA	NA	NA	-0.263418	0.563997	0.381753	x	x	NA
col-98	12	NA	NA	NA	NA	0.0767541	0.508149	0.35891	NA	NA	NA
ZK822.5	7	NA	NA	NA	NA	0.234295	0.340904	0.209264	NA	NA	NA
F18E3.12	48	NA	NA	NA	NA	-0.797486	0.353019	0.207583	x	x	NA
F18E3.13	97	NA	NA	NA	NA	-0.156966	0.384625	-0.114195	x	x	NA
B0410.3	8	NA	NA	NA	NA	-0.414619	-0.685109	-1.24251	x	x	NA
