# Supplementary material for: Cooperative target mRNA destabilization and translation inhibition by miR-58 microRNA family in C. elegans
Source: HighWire-hosted journal article supplement (doi:10.1101/gr.183160.114), 2015-07-31
Supplement: Supplemental_Table_2.xlsx [file Supplemental_Table_2.xlsx]

## Sheet: Sheet1
Transcript	log2 fold change mRNA (mir-58.1 / WT)	log2 fold change mRNA (mir-80; mir-58.1 / WT)	log2 fold change mRNA (mir-80; mir-58.1; mir-81-82 / WT)	Target category*	TargetScan predicted miR-80/81/82 target	TargetScan predicted miR-58.1 target		Target category	Target number
trr-1	0.926997	1.32776	1.4916	Additively upregulated targets	x	x		Additively upregulated targets	93
F26A10.2	0.418631	1.24502	1.36162	Additively upregulated targets	x	x		Synergistically upregulated targets	19
lem-3	0.192489	1.21954	1.36136	Additively upregulated targets	x	x		Shared miR-58.1, miR-80 targets	34
snf-1	0.596167	1.1806	1.30505	Additively upregulated targets	x	x		Shared miR-58.1, miR-81, miR-82 targets	47
ZK809.5	0.0554835	0.829662	1.01177	Additively upregulated targets		x		Shared miR-80, miR-81, miR-82 targets	79
F58H1.4	0.519166	0.842558	0.916105	Additively upregulated targets	x	x		miR-58.1 specific targets	24
ogt-1	0.533007	0.770261	0.911135	Additively upregulated targets	x	x		miR-80 specific targets	17
D2092.5	0.406985	0.757418	0.892113	Additively upregulated targets	x	x		miR-81, miR-82 targets	12
Y42G9A.3	0.422152	0.769718	0.873726	Additively upregulated targets	x			Total targets > 1.3 fold upregulated in mir-80; mir-58.1; mir-81-82	325
isw-1	0.244149	0.762814	0.863101	Additively upregulated targets	x	x		Non-responsive predicted targets < 1.3 fold upregulated in mir-80; mir-58.1; mir-81-82	270
C34F6.1	0.553102	0.67554	0.85611	Additively upregulated targets	x	x
pcaF-1	0.380637	0.771245	0.826199	Additively upregulated targets	x	x		* log2 fold change ≥ 0.05 - single miR-58 family member target criteria
lin-1	0.271953	0.63619	0.826153	Additively upregulated targets	x	x		* log2 fold change ≥ 0.1 between different miR-58 family mutants - > additivity criteria
sea-2	0.303888	0.623232	0.794573	Additively upregulated targets	x			* log2 fold change (mir-80; mir-58.1; mir-81-82 / WT) -log2 fold change (mir-80; mir-58.1 / WT)≥ (log2 fold change (mir-80; mir-58.1 / WT) - log2 fold change (mir-58.1 / WT)) + 0.5 - > synergism criteria
gck-2	0.0627369	0.638887	0.782201	Additively upregulated targets	x	x		* log2 fold change (mir-80; mir-58.1; mir-81-82 / WT) ≥ 0.37 -> miR-58 family target criteria
met-1	0.158745	0.598641	0.770789	Additively upregulated targets	x	x
eor-1	0.318065	0.575907	0.767795	Additively upregulated targets	x
lin-24	0.27821	0.536147	0.676762	Additively upregulated targets	x	x
F10B5.2	0.173276	0.546499	0.664804	Additively upregulated targets	x	x
lrk-1	0.344488	0.495548	0.634879	Additively upregulated targets	x
hda-1	0.378573	0.487355	0.616155	Additively upregulated targets	x	x
set-1	0.148914	0.436234	0.586152	Additively upregulated targets	x	x
ptc-1	0.262998	0.475545	0.57539	Additively upregulated targets	x	x
tbc-18	0.0811862	0.356169	0.554461	Additively upregulated targets	x	x
cpsf-2	0.135435	0.449979	0.545812	Additively upregulated targets	x	x
pxd-1	0.197805	0.384485	0.489863	Additively upregulated targets	x
cdk-4	0.102322	0.286374	0.464251	Additively upregulated targets	x	x
clec-89	0.671652	2.57484	3.10364	Additively upregulated targets		x
ZK20.1	0.107136	1.71365	2.93914	Additively upregulated targets	x	x
oac-14	0.670893	1.65256	2.52111	Additively upregulated targets	x	x
pmk-2	0.627188	1.20448	2.26433	Additively upregulated targets	x	x
M05B5.6	1.37037	1.76948	2.07275	Additively upregulated targets	x	x
K08E4.2	0.214232	1.46504	2.06183	Additively upregulated targets	x	x
Y38E10A.16	0.126908	0.976256	1.97878	Additively upregulated targets	x
Y37A1B.7	0.446797	1.4739	1.95572	Additively upregulated targets	x	x
C31H5.5	0.0539805	0.828485	1.81259	Additively upregulated targets	x	x
frm-10	0.420606	1.0822	1.8045	Additively upregulated targets	x	x
F28H1.1	0.96645	1.50777	1.74948	Additively upregulated targets	x	x
C50B8.4	0.29352	1.04558	1.73814	Additively upregulated targets	x	x
sym-5	0.288273	0.978122	1.71109	Additively upregulated targets		x
Lys-1	0.416077	1.30459	1.69514	Additively upregulated targets	x
C16E9.2	0.388775	1.0511	1.67237	Additively upregulated targets	x	x
C10B5.3	0.247085	1.05194	1.55963	Additively upregulated targets	x	x
tag-52	0.32007	0.809856	1.42686	Additively upregulated targets	x	x
F59B2.13	0.179655	0.939332	1.42455	Additively upregulated targets	x	x
Y17G7B.13	0.436283	1.09191	1.41738	Additively upregulated targets	x	x
nhr-120	0.223311	0.638225	1.40889	Additively upregulated targets	x	x
mab-20	0.302996	0.809975	1.38377	Additively upregulated targets		x
ZK1010.8	0.245892	0.798457	1.38129	Additively upregulated targets	x	x
aph-1	0.343188	0.851963	1.37044	Additively upregulated targets	x
mix-1	0.689543	1.11675	1.36428	Additively upregulated targets	x	x
AH9.1	0.435117	0.907723	1.32991	Additively upregulated targets	x	x
C27A2.1	0.398939	0.833261	1.32413	Additively upregulated targets	x
Y12A6A.2	0.320812	0.570372	1.2932	Additively upregulated targets		x
deg-1	0.619154	0.760455	1.29185	Additively upregulated targets	x	x
ZK970.1	0.788797	0.895012	1.26839	Additively upregulated targets	x	x
flh-2	0.357154	0.941047	1.22934	Additively upregulated targets	x	x
T12G3.4	0.317783	0.781128	1.17507	Additively upregulated targets	x	x
B0205.4	0.203386	0.900982	1.1521	Additively upregulated targets	x
prpf-4	0.428112	0.568916	1.145	Additively upregulated targets	x
Y42A5A.1	0.388171	0.529707	1.1415	Additively upregulated targets	x	x
T24B8.3	0.0492593	0.361327	1.09671	Additively upregulated targets	x	x
mkk-4	0.352667	0.4694	1.06202	Additively upregulated targets	x	x
swan-1	0.277795	0.692071	1.04337	Additively upregulated targets	x	x
B0507.3	0.3515	0.800043	1.01604	Additively upregulated targets	x	x
sta-1	0.460209	0.594188	1.00593	Additively upregulated targets	x	x
C25H3.6	0.0923552	0.667389	0.990601	Additively upregulated targets	x	x
ZK858.5	0.087111	0.543685	0.987328	Additively upregulated targets		x
dnj-23	0.170148	0.634741	0.942096	Additively upregulated targets	x	x
C47G2.4	0.119916	0.651233	0.938866	Additively upregulated targets	x	x
nhr-97	0.381372	0.661472	0.914842	Additively upregulated targets	x
tag-246	0.0902723	0.559307	0.908665	Additively upregulated targets	x	x
ZK507.6	0.198477	0.60247	0.906951	Additively upregulated targets	x	x
Y53F4B.27	0.360729	0.510703	0.895528	Additively upregulated targets	x	x
C36B1.14	0.102182	0.443969	0.86026	Additively upregulated targets	x
C27D8.3	0.359205	0.542967	0.856294	Additively upregulated targets	x	x
his-72	0.190502	0.596901	0.853831	Additively upregulated targets	x	x
T01B10.5	0.231319	0.38612	0.832737	Additively upregulated targets	x	x
myosin	0.167269	0.59688	0.810489	Additively upregulated targets	x	x
F27C1.2	0.27984	0.49667	0.806328	Additively upregulated targets	x	x
ZK616.4	0.19705	0.560672	0.774506	Additively upregulated targets	x	x
F56H1.5	0.25731	0.421577	0.773636	Additively upregulated targets	x	x
unc-84	0.248564	0.398456	0.743641	Additively upregulated targets	x	x
T26A5.6	0.278637	0.431807	0.731608	Additively upregulated targets	x	x
figl-1	0.0674843	0.468387	0.725767	Additively upregulated targets	x	x
C32E8.3	0.0512847	0.156324	0.725365	Additively upregulated targets	x	x
K08E4.3	0.205101	0.320717	0.682575	Additively upregulated targets	x	x
cutl-15	0.0988478	0.324423	0.675606	Additively upregulated targets	x	x
hda-2	0.114422	0.341667	0.663142	Additively upregulated targets	x
F46G10.2	0.138452	0.284459	0.496061	Additively upregulated targets	x
kpc-1	0.154988	0.255632	0.487489	Additively upregulated targets	x	x
C32A3.3	0.0950276	0.239755	0.476772	Additively upregulated targets	x	x
T26A8.1	0.0571284	0.16347	0.453421	Additively upregulated targets	x	x
F52H2.7	0.565481	0.484516	0.549251	miR-58	x	x
grk-2	0.31934	0.375323	0.378584	miR-58	x
lin-2	0.355563	0.382668	0.378052	miR-58	x	x
F42C5.2	0.674419	0.446097	0.674869	miR-58	x	x
rpm-1	0.962542	0.440741	0.810616	miR-58	x	x
F25E2.1	0.851344	0.110823	0.800634	miR-58	x	x
M01H9.2	0.651231	0.181899	0.764714	miR-58	x	x
F47B10.8	0.732338	0.351713	0.631827	miR-58	x
bro-1	1.03528	0.160343	0.589974	miR-58	x
flp-18	0.48963	0.143246	0.518189	miR-58	x	x
cdh-6	1.18301	0.461636	0.438706	miR-58	x
scd-2	0.378191	0.0970461	0.435615	miR-58	x	x
T27F2.2	0.349313	0.179527	0.454879	miR-58	x	x
gpc-1	0.44979	0.217568	0.442369	miR-58	x	x
flp-11	0.22744	0.14585	0.418495	miR-58	x	x
T18D3.6	0.208846	0.156509	0.384568	miR-58	x	x
T24B8.7	0.586916	0.780555	0.582972	miR-58	x	x
nlp-14	0.334248	0.389263	0.560001	miR-58		x
nhr-4	0.432772	0.577605	0.549109	miR-58	x	x
hum-2	0.337299	0.466998	0.468019	miR-58		x
egrh-1	0.339784	0.412551	0.427645	miR-58	x	x
F46H5.2	0.409002	0.248922	0.419862	miR-58	x	x
rig-1	0.373273	0.295976	0.417658	miR-58	x	x
pac-1	0.374539	0.342419	0.389164	miR-58	x	x
dmd-7	0.305166	0.653954	0.662864	miR-58, miR-80	x
mcm-6	0.204146	0.626821	0.659384	miR-58, miR-80	x	x
xpo-1	0.218478	0.66373	0.650634	miR-58, miR-80	x	x
hum-1	0.397319	0.564288	0.644505	miR-58, miR-80	x	x
C01F1.5	0.128902	0.71799	0.628112	miR-58, miR-80	x	x
R07E5.3	0.364694	0.528466	0.616687	miR-58, miR-80	x
dnj-20	0.509753	0.815737	0.609775	miR-58, miR-80	x	x
rha-1	0.322473	0.632134	0.606236	miR-58, miR-80		x
hse-5	0.238031	0.445593	0.601907	miR-58, miR-80	x	x
F55C5.4	0.0521693	0.551502	0.582441	miR-58, miR-80	x	x
let-756	0.33818	0.678839	0.557432	miR-58, miR-80	x	x
rpa-1	0.249834	0.529878	0.523141	miR-58, miR-80	x	x
pgp-9	0.239368	0.563466	0.498383	miR-58, miR-80	x	x
F58D5.5	0.191546	0.495055	0.490407	miR-58, miR-80		x
MEP-1	0.0557458	0.365107	0.457332	miR-58, miR-80	x	x
B0464.6	0.174981	0.425413	0.43336	miR-58, miR-80		x
plk-1	0.0620034	0.422921	0.420169	miR-58, miR-80	x	x
mcm-3	0.103353	0.439708	0.414668	miR-58, miR-80	x	x
D1053.3	0.128214	0.353114	0.412384	miR-58, miR-80	x	x
ceh-30	0.0862066	0.986555	0.389541	miR-58, miR-80	x	x
mcm-5	0.105855	0.486037	0.376954	miR-58, miR-80	x	x
unc-16	0.110945	0.297	0.370563	miR-58, miR-80	x	x
nhr-168	0.582995	1.39547	1.49362	miR-58, miR-80	x
Lys-2	1.20439	2.29115	1.47198	miR-58, miR-80	x
F22F7.6	0.887526	2.84282	1.46103	miR-58, miR-80		x
dpy-28	0.379623	0.955603	1.0164	miR-58, miR-80		x
D1014.2	0.274437	1.25761	0.960242	miR-58, miR-80	x
K11C4.2	0.149445	0.81076	0.861371	miR-58, miR-80	x	x
srx-45	0.639004	0.804104	0.842103	miR-58, miR-80	x	x
tag-192	0.578287	0.704597	0.794205	miR-58, miR-80	x	x
C37H5.13	0.102061	0.671698	0.756322	miR-58, miR-80	x	x
K10D2.1	0.0721313	0.737589	0.74668	miR-58, miR-80	x	x
rrt-2	0.219955	0.641783	0.723167	miR-58, miR-80	x	x
Y32H12A.2	0.410241	0.648029	0.706085	miR-58, miR-80	x
srr-8	1.00552	1.02484	3.54296	miR-58, miR-81, miR-82	x	x
F31F6.8	0.980323	0.857913	2.07388	miR-58, miR-81, miR-82	x	x
C05E11.7	0.633902	0.576695	1.6413	miR-58, miR-81, miR-82	x	x
ace-4	0.886691	0.780597	1.5902	miR-58, miR-81, miR-82	x	x
C44H4.1	0.5632	0.354834	1.33369	miR-58, miR-81, miR-82		x
hlh-10	0.816182	-0.135958	1.26237	miR-58, miR-81, miR-82	x	x
T27E4.5	0.364081	0.255517	1.24977	miR-58, miR-81, miR-82	x
K01A12.3	0.757607	0.5269	1.18783	miR-58, miR-81, miR-82	x
nlp-8	0.489326	0.341311	1.08674	miR-58, miR-81, miR-82	x	x
sul-2	0.319071	0.222649	1.0383	miR-58, miR-81, miR-82	x
F41B4.3	0.596419	0.558479	1.03491	miR-58, miR-81, miR-82	x	x
R05A10.6	0.3399	0.292073	0.945439	miR-58, miR-81, miR-82	x	x
C17G10.7	0.629844	0.212524	0.868449	miR-58, miR-81, miR-82	x	x
nhr-47	0.201195	0.248292	0.8055	miR-58, miR-81, miR-82	x	x
ceh-48	0.532367	0.549779	0.735237	miR-58, miR-81, miR-82	x	x
rnr-2	0.517527	0.602971	0.644101	miR-58, miR-81, miR-82		x
dre-1	0.48541	0.539837	0.639481	miR-58, miR-81, miR-82	x	x
ceh-20	0.561129	0.538328	0.639223	miR-58, miR-81, miR-82	x	x
nhr-66	0.465448	0.458192	0.63281	miR-58, miR-81, miR-82	x	x
Y71G10AR.1	0.133421	0.206654	0.372453	miR-58, miR-81, miR-82	x	x
T16G1.2	0.119334	0.032107	0.551978	miR-58, miR-81, miR-82	x	x
F28E10.2	0.113516	-0.0214464	0.427166	miR-58, miR-81, miR-82	x	x
F48E3.8	1.00664	0.794721	1.38942	miR-58, miR-81, miR-82	x	x
K08B5.1	0.415573	0.0447124	0.785673	miR-58, miR-81, miR-82	x	x
dop-2	0.513496	0.350516	0.736275	miR-58, miR-81, miR-82	x	x
C50F2.8	0.283813	0.00073781	0.562498	miR-58, miR-81, miR-82		x
F21G4.6	0.646135	0.647757	1.08043	miR-58, miR-81, miR-82	x	x
C46H11.10	0.785578	0.702617	1.05276	miR-58, miR-81, miR-82	x	x
T23B7.3	0.749188	0.587999	0.857746	miR-58, miR-81, miR-82	x	x
C34E7.3	0.239028	0.290902	0.842429	miR-58, miR-81, miR-82	x
nhr-138	0.524403	0.597229	0.840639	miR-58, miR-81, miR-82	x	x
T16A9.4	0.546281	0.471373	0.793242	miR-58, miR-81, miR-82	x	x
ZK675.3	0.532234	0.521216	0.756149	miR-58, miR-81, miR-82	x	x
K06A5.8	0.517233	0.526017	0.737321	miR-58, miR-81, miR-82	x	x
dgk-2	0.123309	0.18319	0.724995	miR-58, miR-81, miR-82	x	x
smp-1	0.235798	0.22764	0.67722	miR-58, miR-81, miR-82	x	x
ckk-1	0.398939	0.442459	0.667583	miR-58, miR-81, miR-82	x	x
nas-4	0.326204	0.3914	0.637774	miR-58, miR-81, miR-82	x	x
tag-260	0.0997354	0.160116	0.571888	miR-58, miR-81, miR-82	x	x
rgs-4	0.343054	0.213938	0.567785	miR-58, miR-81, miR-82	x	x
M01A8.2	0.0874813	0.144012	0.538307	miR-58, miR-81, miR-82	x	x
C33A11.1	0.193653	0.250827	0.499179	miR-58, miR-81, miR-82	x	x
F45H10.5	0.141119	0.0908745	0.477521	miR-58, miR-81, miR-82	x
ddr-1	0.0790641	0.155843	0.41033	miR-58, miR-81, miR-82	x	x
C28H8.1	0.154199	0.189624	0.398308	miR-58, miR-81, miR-82	x	x
T07C12.11	0.30287	-0.124184	0.858392	miR-58, miR-81, miR-82	x	x
osm-11	0.0487835	-0.210068	0.478506	miR-58, miR-81, miR-82	x	x
C06G4.6	-2.65044	2.48965	2.479	miR-80	x	x
F13D12.9	-0.0285349	1.28829	1.2595	miR-80	x	x
F36H2.5	-0.397334	1.1934	1.13056	miR-80	x	x
cyb-2.2	-0.727185	1.09021	1.12987	miR-80	x	x
C27F2.7	-1.02185	0.906367	0.8909	miR-80	x
rad-54	-0.0298712	0.800438	0.793848	miR-80	x	x
cyb-1	-0.162003	0.767136	0.759935	miR-80	x	x
oct-1	-0.142302	0.754137	0.66998	miR-80	x	x
F10E7.11	-0.255429	0.621388	0.651116	miR-80	x	x
top-2	-0.0745683	0.564793	0.63657	miR-80	x	x
hsr-9	0.0354977	0.544108	0.561302	miR-80		x				?
F29B9.2	-0.18107	0.479602	0.54672	miR-80		x			D>Q
F13B12.6	0.0314402	0.558832	0.527757	miR-80	x	x
set-2	-0.019734	0.630654	0.50613	miR-80	x	x
cgh-1	-0.36336	0.622204	0.455339	miR-80	x	x
col-99	-0.126662	0.356793	0.438395	miR-80	x	x
fibrulin-1D	0.0118951	0.362122	0.401006	miR-80	x	x
F41D9.2	-0.00241001	0.525839	1.55849	miR-80, miR-81, miR-82	x
ptr-10	0.0381786	0.309605	1.34711	miR-80, miR-81, miR-82	x	x
F13A7.12	-0.244333	1.75655	1.9504	miR-80, miR-81, miR-82	x
hil-3	-0.376928	1.08586	1.23571	miR-80, miR-81, miR-82	x	x
spdl-1	-0.188402	0.922853	1.09993	miR-80, miR-81, miR-82	x
T28F3.4	0.0130403	0.737867	0.842646	miR-80, miR-81, miR-82	x
M106.2	-0.0542105	0.60854	0.760301	miR-80, miR-81, miR-82		x
C46F11.4	-0.0516868	0.513363	0.671172	miR-80, miR-81, miR-82	x	x
C09E9.1	-0.112982	0.527459	0.66425	miR-80, miR-81, miR-82	x
pcn-1	0.0178609	0.452901	0.639515	miR-80, miR-81, miR-82	x	x
gei-6	-0.171487	0.42764	0.621816	miR-80, miR-81, miR-82	x	x
such-1	-0.238133	0.487855	0.611302	miR-80, miR-81, miR-82	x
H20J04.6	-0.0155704	0.398799	0.598764	miR-80, miR-81, miR-82	x	x
bre-3	0.0230948	0.443624	0.546031	miR-80, miR-81, miR-82	x	x
F21H12.1	-0.00511965	0.339676	0.509206	miR-80, miR-81, miR-82	x	x
ZC250.4	-0.143047	0.338032	0.467325	miR-80, miR-81, miR-82	x	x
cids-1	-0.155594	0.223729	0.423157	miR-80, miR-81, miR-82		x
F11A10.6	-0.034861	0.266409	0.415002	miR-80, miR-81, miR-82	x	x
cdc-26	-0.0489089	0.276894	0.409135	miR-80, miR-81, miR-82	x	x
T27D12.1	-0.219697	0.24655	0.403693	miR-80, miR-81, miR-82	x	x
F40F8.11	-0.278871	0.257889	0.389848	miR-80, miR-81, miR-82	x	x
F54C1.1	0.0120905	0.209396	0.382933	miR-80, miR-81, miR-82	x	x
M03F8.1	-0.0730966	0.162895	1.46682	miR-80, miR-81, miR-82	x
Y47D3B.3	-1.72303	1.49986	2.52898	miR-80, miR-81, miR-82	x	x
Y38E10A.13	-0.0160516	1.2803	2.24745	miR-80, miR-81, miR-82	x	x
W01D2.5	-0.0965742	1.29197	2.11133	miR-80, miR-81, miR-82	x
Y38E10A.26	-1.02949	1.17718	1.98312	miR-80, miR-81, miR-82	x	x
M01A8.1	-0.681144	1.03497	1.87512	miR-80, miR-81, miR-82	x	x
W01A11.7	-0.079945	0.592899	1.71637	miR-80, miR-81, miR-82	x	x
C13F10.2	-0.423245	0.780501	1.63579	miR-80, miR-81, miR-82	x	x
flp-10	0.0125903	0.760733	1.56932	miR-80, miR-81, miR-82	x	x
B0457.2	-0.0612697	0.582971	1.391	miR-80, miR-81, miR-82	x	x
Lin-52	-0.19923	0.672096	1.38218	miR-80, miR-81, miR-82	x	x
K07F5.12	-0.295492	0.950857	1.34456	miR-80, miR-81, miR-82	x	x
R07G3.7	-0.106326	0.854289	1.28515	miR-80, miR-81, miR-82	x	x
fsn-1	0.0157039	0.586634	1.16047	miR-80, miR-81, miR-82	x
ugt-20	-0.0543485	0.648086	1.15495	miR-80, miR-81, miR-82	x
T04F8.9	-0.876586	0.813598	1.10474	miR-80, miR-81, miR-82	x	x
R03A10.1	-0.547404	0.617344	1.04644	miR-80, miR-81, miR-82	x
K11B4.2	-0.0546638	0.256238	1.03831	miR-80, miR-81, miR-82	x
pen-2	-0.383502	0.22674	1.03781	miR-80, miR-81, miR-82	x	x
C02F5.13	-0.174519	0.296353	1.02693	miR-80, miR-81, miR-82	x	x
taf-9	-0.417428	0.307913	1.01615	miR-80, miR-81, miR-82	x
B0336.13	-0.299661	0.622704	1.01404	miR-80, miR-81, miR-82	x	x
twk-24	-0.139439	0.606336	0.981537	miR-80, miR-81, miR-82	x	x
F32D8.3	0.00462566	0.435432	0.959991	miR-80, miR-81, miR-82	x	x
T01C3.2	-0.582554	0.486314	0.95844	miR-80, miR-81, miR-82	x	x
twk-46	-0.0917404	0.663997	0.885746	miR-80, miR-81, miR-82	x
Y42A5A.3	-0.307478	0.488383	0.881571	miR-80, miR-81, miR-82	x
bir-1	-0.27186	0.428489	0.878699	miR-80, miR-81, miR-82	x	x
W01C8.5	-0.0129424	0.281376	0.87472	miR-80, miR-81, miR-82	x	x
C32D5.7	0.0299787	0.417751	0.827487	miR-80, miR-81, miR-82	x	x
Y54G11A.11	-0.111509	0.212659	0.797963	miR-80, miR-81, miR-82	x	x
C27H5.4	0.0399203	0.481126	0.782471	miR-80, miR-81, miR-82	x	x
tsp-20	0.0288271	0.334339	0.758682	miR-80, miR-81, miR-82	x	x
K02D7.5	-0.0300476	0.538323	0.753632	miR-80, miR-81, miR-82		x
dnaJ	-0.117655	0.352098	0.724626	miR-80, miR-81, miR-82		x
acl-14	-0.0636326	0.460834	0.690716	miR-80, miR-81, miR-82	x	x
fkb-6	-0.507724	0.229681	0.676411	miR-80, miR-81, miR-82	x	x
K05C4.7	0.0210003	0.445898	0.649152	miR-80, miR-81, miR-82	x	x
evl-20	-0.142133	0.297482	0.625892	miR-80, miR-81, miR-82	x	x
sms-2	0.0151372	0.278094	0.565788	miR-80, miR-81, miR-82	x
F11A10.5	-0.314505	0.12094	0.549152	miR-80, miR-81, miR-82	x	x
ZK1248.11	-0.312733	0.15594	0.540007	miR-80, miR-81, miR-82	x
daf-21	-0.0054406	0.24138	0.514368	miR-80, miR-81, miR-82	x	x
pqn-70	-0.393397	0.191297	0.485146	miR-80, miR-81, miR-82	x	x
gfl-1	-0.101163	0.251932	0.484047	miR-80, miR-81, miR-82	x	x
Y53C10A.5	-0.144006	0.0656741	0.475941	miR-80, miR-81, miR-82	x
rpb-9	-0.0970268	0.145292	0.469833	miR-80, miR-81, miR-82	x	x
T10B5.4	0.00759802	0.162124	0.468189	miR-80, miR-81, miR-82	x	x
set-4	-0.000310108	0.220132	0.456653	miR-80, miR-81, miR-82	x	x
hmg-1.1	-0.205802	0.187652	0.450546	miR-80, miR-81, miR-82	x	x
C34D1.4	0.0403035	0.0491316	0.446307	miR-80, miR-81, miR-82	x	x
dnj-30	-0.217535	0.199399	0.429666	miR-80, miR-81, miR-82	x	x
ZK686.4	-0.655189	0.0538886	0.420598	miR-80, miR-81, miR-82	x	x
F53F4.3	-0.0470022	0.187734	0.418069	miR-80, miR-81, miR-82	x	x
T24F1.2	-0.124568	0.0894806	0.407738	miR-80, miR-81, miR-82	x	x
air-2	0.0319894	0.807531	0.989846	miR-80, miR-81, miR-82	x	x
him-10	-0.191305	0.77199	0.968687	miR-80, miR-81, miR-82	x
Y38E10A.12	-0.453585	-0.512721	1.0698	miR-81, miR-82	x
C06E2.1	-0.0241204	-0.16816	0.786418	miR-81, miR-82	x	x
ZK682.7	-0.41028	-0.352588	0.678798	miR-81, miR-82	x
ttr-33	-0.413307	-0.366174	0.64427	miR-81, miR-82	x
F20D6.10	-0.00708108	0.0331699	0.470799	miR-81, miR-82	x	x
C18A3.2	-0.209405	0.0359648	0.462345	miR-81, miR-82	x	x
F59B10.4	-0.0306762	0.0373863	0.412473	miR-81, miR-82	x	x
T25G3.1	-0.754216	-0.0783959	0.37959	miR-81, miR-82	x
F33D11.8	-0.0492871	-0.280528	1.01769	miR-81, miR-82	x
srr-10	-1.01362	-0.704906	0.973728	miR-81, miR-82	x	x
ZK792.4	-0.250035	-0.450671	0.514749	miR-81, miR-82	x	x
pdl-1	-0.0257321	-0.053706	0.503308	miR-81, miR-82	x	x
nas-3	1.44154	1.75738	3.58494	Synergistically upregulated targets	x	x
ttr-23	0.913667	1.45936	2.61255	Synergistically upregulated targets	x	x
F48C5.1	0.4047	0.843742	2.11629	Synergistically upregulated targets	x	x
ZK792.7	0.191133	0.582356	1.82069	Synergistically upregulated targets	x
R03G5.7	1.06779	1.14204	1.81768	Synergistically upregulated targets	x	x
B0361.9	0.283984	0.372561	1.62435	Synergistically upregulated targets	x	x
glit-1	0.102571	0.366793	1.56775	Synergistically upregulated targets	x	x
lips-5	0.259815	0.48087	1.27534	Synergistically upregulated targets	x	x
R09F10.3	0.187137	0.285832	1.14803	Synergistically upregulated targets	x	x
W06B11.1	0.0826229	0.247982	1.14131	Synergistically upregulated targets	x	x
C18G1.1	0.271796	0.387136	1.04861	Synergistically upregulated targets	x
C14A4.12	0.199077	0.341173	1.02751	Synergistically upregulated targets	x	x
H13N06.2	0.102136	-0.183882	1.3284	Synergistically upregulated targets	x	x
nas-25	0.1746	0.00392794	1.26296	Synergistically upregulated targets	x
cnc-4	0.105495	0.0700503	1.05322	Synergistically upregulated targets	x	x
F23F1.4	0.0658413	0.086071	0.805049	Synergistically upregulated targets	x	x
unc-130	0.196756	-0.0141389	0.779895	Synergistically upregulated targets	x	x
R05H11.2	0.146284	-0.122724	0.698949	Synergistically upregulated targets	x	x
C09B8.8	0.0529001	-0.273343	0.568107	Synergistically upregulated targets		x
lsm-8	-0.083205	0.0988426	0.368335	Non-responsive targets	x	x
C27A2.4	-0.334	0.411606	0.36554	Non-responsive targets	x	x
C50B8.1	-0.167835	0.224321	0.364485	Non-responsive targets	x
mec-8	0.261771	0.188629	0.364195	Non-responsive targets	x	x
cnt-2	0.127271	0.196422	0.363408	Non-responsive targets	x	x
ZK470.2	0.0381461	0.243534	0.361313	Non-responsive targets	x	x
gld-2	-0.00450562	0.361819	0.354755	Non-responsive targets	x	x
cpsf-3	0.104619	0.28576	0.34582	Non-responsive targets	x	x
T23B12.4	0.191137	0.524729	0.345589	Non-responsive targets		x
psf-1	-0.40434	0.292102	0.337561	Non-responsive targets	x	x
sel-12	0.209551	0.360241	0.336417	Non-responsive targets	x	x
sax-3	0.217108	0.2243	0.335148	Non-responsive targets	x	x
mcm-7	-0.0782185	0.059229	0.328957	Non-responsive targets	x	x
nhr-40	0.569001	0.366247	0.32708	Non-responsive targets	x	x
T12E12.1	0.0911636	0.240789	0.326839	Non-responsive targets	x	x
cit-1.2	0.0703991	0.198337	0.323115	Non-responsive targets	x
Y44A6D.3	0.0251434	0.199959	0.317735	Non-responsive targets	x	x
frm-3	0.573883	0.302105	0.314603	Non-responsive targets	x	x
tag-72	-0.0866847	0.146198	0.31427	Non-responsive targets	x
nhr-68	0.198858	0.148794	0.312314	Non-responsive targets	x	x
tag-153	-0.129204	0.441762	0.310657	Non-responsive targets	x	x
gbb-1	0.430258	0.285775	0.30862	Non-responsive targets	x	x
casy-1	0.308203	0.223303	0.308109	Non-responsive targets	x	x
tag-233	0.111477	-0.0371275	0.30786	Non-responsive targets	x	x
glb-2	0.721634	0.609101	0.302525	Non-responsive targets	x	x
F25G6.2	-0.0409526	0.198954	0.29785	Non-responsive targets	x	x
C27B7.2	-0.0250005	0.326013	0.297556	Non-responsive targets	x	x
flp-9	0.326566	0.0941914	0.296655	Non-responsive targets	x
F58H1.7	0.321557	-0.201653	0.29187	Non-responsive targets	x	x
F57B7.2	0.350903	0.230636	0.289798	Non-responsive targets	x
inx-18	0.0871553	0.0946726	0.289042	Non-responsive targets	x	x
dyc-1	0.258414	0.179718	0.288433	Non-responsive targets	x	x
T01C3.11	0.21986	-0.0981678	0.287939	Non-responsive targets	x	x
F25G6.9	0.32215	0.439877	0.282827	Non-responsive targets	x	x
pqn-45	-0.308646	0.335656	0.281286	Non-responsive targets	x	x
cnc-3	0.0923988	0.364039	0.279275	Non-responsive targets	x	x
nhr-71	0.324355	0.351465	0.279108	Non-responsive targets	x
Y49G5B.1	-0.246472	-0.0527164	0.278496	Non-responsive targets	x	x
glb-27	0.680276	0.203229	0.278472	Non-responsive targets	x
pqn-18	-0.0177113	0.167791	0.278215	Non-responsive targets	x
tag-97	0.423984	0.192153	0.274989	Non-responsive targets	x
pqn-89	-0.022971	0.198075	0.270194	Non-responsive targets	x	x
C30B5.7	0.666745	-0.0173849	0.269755	Non-responsive targets	x	x
C24H10.1	-0.461547	0.0212646	0.269318	Non-responsive targets	x	x
gon-2	0.360572	0.364802	0.265562	Non-responsive targets	x	x
F28C1.3	0.435776	0.299909	0.26535	Non-responsive targets	x
C41D11.5	-0.277548	0.324595	0.263472	Non-responsive targets	x
C33H5.7	0.0634913	0.31356	0.263403	Non-responsive targets	x	x
DH11.5	0.2923	0.071037	0.261822	Non-responsive targets	x
F40F4.7	-0.162358	0.0656875	0.260852	Non-responsive targets	x	x
cdh-9	0.341871	0.114779	0.257112	Non-responsive targets	x	x
tag-65	0.043268	0.238498	0.252737	Non-responsive targets	x
ubq-1	0.0934972	0.242068	0.251892	Non-responsive targets	x	x
rgs-7	0.19133	0.120686	0.250749	Non-responsive targets	x
aex-6	0.317765	0.136133	0.248145	Non-responsive targets		x
C17E4.6	-0.099384	0.260008	0.235085	Non-responsive targets	x	x
tag-125	-0.00226879	0.234951	0.233759	Non-responsive targets	x	x
csn-6	0.0107489	0.161379	0.233707	Non-responsive targets	x	x
F55D10.4	0.618477	0.332546	0.232032	Non-responsive targets	x
F56D3.1	0.0922879	0.317634	0.232029	Non-responsive targets	x	x
elo-3	0.0595728	0.16311	0.224708	Non-responsive targets	x	x
B0393.6	-0.642887	0.299191	0.224019	Non-responsive targets		x
F09C3.2	0.146165	0.148442	0.223624	Non-responsive targets	x
F08B6.3	0.0319816	0.188103	0.219301	Non-responsive targets	x	x
kin-32	0.374194	0.29732	0.219197	Non-responsive targets	x
lips-10	-0.362114	-0.3489	0.218656	Non-responsive targets	x	x
Y38C1AA.1	-0.154246	-0.0135698	0.21631	Non-responsive targets	x	x
F01D4.9	0.244528	-1.67407	0.212914	Non-responsive targets	x	x
F46C8.8	-0.116237	-0.245053	0.212553	Non-responsive targets	x	x
dgk-5	0.512322	0.298391	0.208735	Non-responsive targets	x	x
ins-17	0.215665	0.0815637	0.206725	Non-responsive targets	x	x
C48E7.6	0.238006	0.116315	0.203465	Non-responsive targets	x	x
F41E6.1	-0.0812486	-0.00575373	0.199376	Non-responsive targets	x	x
rpb-4	-0.0745985	0.099182	0.194012	Non-responsive targets	x	x
unc-41	0.448997	0.166969	0.186917	Non-responsive targets	x
wapl-1	0.14519	0.187452	0.186706	Non-responsive targets	x	x
die-1	0.378636	0.0907598	0.186552	Non-responsive targets	x	x
wts-1	0.220625	0.141601	0.18036	Non-responsive targets	x
clh-2	0.594528	0.314158	0.178087	Non-responsive targets	x	x
Y9C2UA.1	0.321749	0.146698	0.171903	Non-responsive targets	x	x
K10H10.4	-0.940689	-1.28351	0.171032	Non-responsive targets	x	x
ZK418.9	0.00680876	0.211393	0.170988	Non-responsive targets	x	x
F49E12.12	-0.0131779	-0.0411792	0.165403	Non-responsive targets	x	x
ZK669.5	-0.320694	-0.00809793	0.163149	Non-responsive targets	x	x
Y67A10A.8	0.16795	0.171486	0.162687	Non-responsive targets	x	x
T01G9.3	0.21279	0.0231765	0.162342	Non-responsive targets	x	x
mcm-4	-0.0511363	0.218197	0.15792	Non-responsive targets	x	x
mab-5	0.20675	-0.0469179	0.154718	Non-responsive targets	x	x
glb-3	0.528255	-0.0761019	0.154553	Non-responsive targets	x
rgef-1	0.532326	0.153345	0.153461	Non-responsive targets	x
ife-3	-0.101171	0.246584	0.142542	Non-responsive targets	x	x
mnm-2	0.12455	0.47708	0.140558	Non-responsive targets	x	x
Y66D12A.8	-0.328637	0.0827252	0.134999	Non-responsive targets	x
fkh-9	0.152948	-0.0386183	0.13264	Non-responsive targets	x	x
ser-2	0.351249	-0.0630423	0.129611	Non-responsive targets	x	x
K11H3.5	-0.149902	-0.874263	0.12632	Non-responsive targets	x	x
glb-8	0.256866	0.332521	0.125383	Non-responsive targets	x
Y75B8A.5	0.205183	0.203282	0.124998	Non-responsive targets	x	x
R05D11.7	-0.642192	-0.0336919	0.122058	Non-responsive targets	x	x
fhod-2	0.237625	0.0218776	0.118122	Non-responsive targets	x	x
lsm-7	-0.345811	0.0379543	0.114385	Non-responsive targets	x	x
ldb-1	0.15111	0.0615273	0.111929	Non-responsive targets	x	x
cyn-11	-0.245977	0.0844653	0.109056	Non-responsive targets	x	x
dbl-1	0.0535468	-0.102922	0.106597	Non-responsive targets	x	x
B0336.3	-0.0240857	0.125754	0.103937	Non-responsive targets	x	x
ins-1	0.314617	0.00205636	0.101238	Non-responsive targets	x	x
tag-318	0.0601106	0.134226	0.0992503	Non-responsive targets	x	x
htz-1	-0.0309959	0.0652108	0.0932461	Non-responsive targets	x	x
C06G1.2	-0.0330199	0.0646269	0.0921111	Non-responsive targets	x	x
tag-175	-0.281302	-0.205347	0.0890699	Non-responsive targets		x
cog-1	-0.198286	0.155079	0.0865746	Non-responsive targets	x
Tbp-1	-0.23969	0.120311	0.0794368	Non-responsive targets	x	x
F08G12.2	-0.157825	-0.0903784	0.0746956	Non-responsive targets	x	x
ZK930.3	-0.490487	-0.121485	0.0706338	Non-responsive targets	x
F48B9.5	-0.34522	0.0160115	0.0699282	Non-responsive targets	x	x
pde-3	0.365461	-0.0222493	0.0670168	Non-responsive targets	x	x
K08F4.2	-0.274172	0.0974268	0.0657782	Non-responsive targets	x	x
cfz-2	0.440643	-0.333109	0.0615007	Non-responsive targets	x	x
F48C5.2	0.335178	0.248661	0.0569911	Non-responsive targets	x	x
C27H5.3	-0.38359	-0.00640712	0.054612	Non-responsive targets	x	x
C44B7.7	-0.061839	0.0259248	0.0520665	Non-responsive targets	x	x
tag-170	-0.0708491	-0.0371093	0.0513615	Non-responsive targets	x	x
vbh-1	-0.0607123	0.238467	0.0461865	Non-responsive targets	x	x
dgk-1	0.284818	0.0141724	0.0419091	Non-responsive targets	x
B0454.6	-0.522624	-0.314246	0.0409305	Non-responsive targets	x	x
rpb-7	-0.226879	0.0130135	0.0370964	Non-responsive targets	x	x
rpb-3	-0.082939	0.0152617	0.0362613	Non-responsive targets	x	x
C54G10.4	-0.326501	-0.32571	0.0190277	Non-responsive targets	x	x
rpb-11	-0.308734	-0.103627	0.0148894	Non-responsive targets	x
F27D4.2	0.0233474	-0.0164066	0.0147029	Non-responsive targets	x	x
srv-1	0.268993	-0.0804668	0.0124066	Non-responsive targets	x	x
rab-37	0.592159	-0.201606	0.00979619	Non-responsive targets	x	x
F11D5.1	0.202303	-0.152029	0.00137898	Non-responsive targets	x	x
grk-1	0.162036	0.0291619	-0.000158249	Non-responsive targets	x
R09B3.3	-0.277807	0.046601	-0.000417437	Non-responsive targets	x	x
ZK816.1	0.103852	-0.290449	-0.00255595	Non-responsive targets	x	x
C49F5.8	-0.00396041	-0.0962388	-0.00378674	Non-responsive targets	x	x
H10E21.5	0.28742	0.172765	-0.00517044	Non-responsive targets	x	x
F23F12.12	-0.107958	0.520623	-0.00567009	Non-responsive targets	x	x
T23C6.5	-0.125948	-0.152388	-0.00633475	Non-responsive targets	x	x
R11A8.5	0.0666829	0.2139	-0.00854746	Non-responsive targets	x	x
F58E10.3	-0.119402	-0.0414199	-0.0118764	Non-responsive targets	x	x
ZC449.4	0.125846	0.229107	-0.0138095	Non-responsive targets	x	x
mec-2	0.243796	0.0968772	-0.0257818	Non-responsive targets	x
H01G02.3	0.367209	0.0104427	-0.0259628	Non-responsive targets	x	x
C09F12.3	-0.198906	-0.442056	-0.0270455	Non-responsive targets	x	x
aat-3	0.0813041	-0.00657543	-0.0341549	Non-responsive targets	x	x
ceh-9	-0.0679341	-0.55652	-0.0400142	Non-responsive targets	x
F32G8.3	-0.782033	-0.348443	-0.05126	Non-responsive targets	x	x
R11A5.7	0.0362166	-0.615245	-0.0514556	Non-responsive targets	x	x
ptr-14	0.0658391	-0.143312	-0.0547786	Non-responsive targets		x
folt-3	0.634139	0.43798	-0.0657041	Non-responsive targets	x	x
F28E10.1	0.0658433	-0.24941	-0.0659815	Non-responsive targets	x	x
gck-4	0.128173	-0.0621966	-0.0708649	Non-responsive targets	x	x
cah-5	0.135815	0.152066	-0.0766063	Non-responsive targets	x	x
B0563.6	0.279705	-0.126914	-0.0784573	Non-responsive targets	x	x
F59A3.3	-0.0217764	0.162533	-0.0787077	Non-responsive targets	x	x
K02H8.1	0.101566	0.125973	-0.0808118	Non-responsive targets	x	x
cra-1	0.246884	0.205995	-0.0813684	Non-responsive targets	x	x
twk-23	0.937634	0.25143	-0.0843521	Non-responsive targets	x
C56G2.1	-0.0328614	0.0213762	-0.0845824	Non-responsive targets	x	x
ccf-1	-0.0708906	-0.0472883	-0.0886986	Non-responsive targets	x	x
tag-297	-0.206519	-0.280363	-0.0909744	Non-responsive targets	x	x
F26B1.2	-0.23	-0.00377697	-0.092291	Non-responsive targets	x	x
tag-89	0.187111	0.0135412	-0.0935846	Non-responsive targets	x	x
C15C7.7	0.181744	-0.434883	-0.0945221	Non-responsive targets	x	x
pqn-35	-0.136541	-0.408787	-0.104192	Non-responsive targets	x	x
R04F11.1	-0.275259	-0.287094	-0.105894	Non-responsive targets	x	x
unc-103	0.292137	0.0359518	-0.107884	Non-responsive targets	x
K03H1.5	0.27822	0.0663583	-0.108918	Non-responsive targets	x	x
ztf-19	0.0437302	-0.0463899	-0.109821	Non-responsive targets	x
alr-1	0.357671	-0.146054	-0.113627	Non-responsive targets	x	x
pkc-2	0.145	0.0183194	-0.114124	Non-responsive targets	x	x
ast-1	0.154431	-0.0586608	-0.120114	Non-responsive targets	x
ceh-24	-0.0259921	-0.128634	-0.125694	Non-responsive targets	x
ZK287.1	0.502375	-0.128525	-0.129389	Non-responsive targets	x	x
F18E3.11	-0.45909	0.202171	-0.13338	Non-responsive targets	x	x
jnk-1	0.337675	-0.149188	-0.133549	Non-responsive targets		x
eat-4	0.247725	-0.0667628	-0.143082	Non-responsive targets	x	x
gpb-1	0.186367	0.0231076	-0.144171	Non-responsive targets	x	x
F14D7.8	-0.0937918	-0.542433	-0.146124	Non-responsive targets	x
ivd-1	-0.0618347	0.114818	-0.151608	Non-responsive targets	x	x
lgc-41	0.277796	-0.301878	-0.155405	Non-responsive targets	x	x
lag-2	0.336019	-0.608813	-0.157367	Non-responsive targets	x	x
B0495.6	-0.122989	-0.184515	-0.158678	Non-responsive targets	x	x
R13A5.9	0.360363	-0.101908	-0.166016	Non-responsive targets	x	x
Msi3p	0.193438	-0.0389169	-0.172091	Non-responsive targets	x	x
unc-42	0.48435	-0.00455699	-0.176521	Non-responsive targets	x	x
R11.2	-0.426035	-0.618588	-0.176527	Non-responsive targets	x	x
gar-3	0.496313	-0.00529679	-0.191817	Non-responsive targets	x	x
rsp-1	-0.250238	-0.0699971	-0.193827	Non-responsive targets	x	x
dhs-27	-0.0381689	-0.165578	-0.198276	Non-responsive targets	x	x
K07B1.4	0.931092	0.329442	-0.200841	Non-responsive targets	x	x
ckr-1	0.345785	-0.161192	-0.203226	Non-responsive targets	x
ppn-1	0.0856998	0.0784437	-0.208134	Non-responsive targets	x	x
R05C11.1	0.337124	-0.28854	-0.212019	Non-responsive targets	x
hyl-1	-0.0973004	-0.103418	-0.212324	Non-responsive targets	x	x
tbx-7	-0.7557	-0.439988	-0.215073	Non-responsive targets	x
C18B12.2	0.460552	-0.059178	-0.223703	Non-responsive targets	x	x
snr-3	-0.248946	-0.156215	-0.242626	Non-responsive targets	x	x
R09B3.2	-0.716405	-0.202892	-0.244698	Non-responsive targets	x	x
F35B12.10	0.277843	-0.116496	-0.251471	Non-responsive targets	x
hmt-1	-0.188183	0.0461882	-0.253422	Non-responsive targets	x	x
grsp-1	-0.256827	-0.470426	-0.253429	Non-responsive targets	x
ttx-3	0.0865148	-0.470853	-0.255703	Non-responsive targets	x	x
ntl-2	-0.0717674	-0.227385	-0.261223	Non-responsive targets	x	x
snr-6	-0.281056	-0.120231	-0.274539	Non-responsive targets	x	x
T02E9.3	0.273556	-0.097724	-0.280533	Non-responsive targets	x	x
egl-46	0.0578586	-0.380278	-0.305878	Non-responsive targets	x
F18E3.12	-0.993157	-0.00880701	-0.30755	Non-responsive targets	x	x
C34E10.10	-0.244389	-0.294048	-0.308736	Non-responsive targets	x
snr-1	-0.198113	-0.243003	-0.33117	Non-responsive targets	x
col-115	-0.582942	-0.692052	-0.334745	Non-responsive targets	x	x
F32H5.3	-0.334144	-0.667249	-0.339114	Non-responsive targets	x	x
F47B7.2	-0.156225	-0.205437	-0.355438	Non-responsive targets	x	x
lgc-40	0.294961	-0.0914915	-0.356188	Non-responsive targets	x	x
C12D12.5	-0.783545	-0.493142	-0.358446	Non-responsive targets	x	x
Y34B4A.7	-0.0432531	-0.281981	-0.368879	Non-responsive targets	x	x
cho-1	0.233458	-0.0557029	-0.368885	Non-responsive targets	x	x
mdt-18	-0.237604	-0.206962	-0.380179	Non-responsive targets	x
toh-1	-0.256356	-0.659574	-0.389705	Non-responsive targets	x	x
exos-2	-0.223462	-0.214499	-0.406705	Non-responsive targets	x	x
unc-30	0.169124	-0.187596	-0.40767	Non-responsive targets	x	x
F28D1.6	0.010313	-0.436658	-0.412879	Non-responsive targets	x
mxl-3	0.0345365	-0.0305871	-0.415517	Non-responsive targets	x	x
F23B12.4	-0.306285	-0.737302	-0.459881	Non-responsive targets	x	x
C40H5.2	0.0375261	-0.193213	-0.465439	Non-responsive targets	x	x
hsp-1	-0.281877	-0.251268	-0.479767	Non-responsive targets	x	x
zag-1	0.312904	-0.546585	-0.554809	Non-responsive targets	x	x
F59F5.1	-0.451181	-0.433474	-0.555772	Non-responsive targets	x	x
Y43C5A.7	-1.04565	-1.1216	-0.576541	Non-responsive targets	x	x
nhr-25	0.440058	-0.627464	-0.581858	Non-responsive targets	x	x
adt-1	0.113246	-0.358734	-0.587827	Non-responsive targets	x	x
M28.8	-0.164399	-0.412894	-0.589079	Non-responsive targets	x	x
hrg-4	-0.27579	0.334143	-0.596346	Non-responsive targets	x	x
T24C12.4	-0.304841	-0.957554	-0.596737	Non-responsive targets	x	x
tyr-2	-0.351159	-0.776902	-0.604796	Non-responsive targets	x	x
C15C6.1	-0.277652	-0.475635	-0.620257	Non-responsive targets	x	x
F25G6.7	-0.260617	-0.601596	-0.626363	Non-responsive targets	x	x
F18E3.13	-0.352637	0.0227992	-0.629328	Non-responsive targets	x	x
ZK180.5	-0.225568	-0.735455	-0.64193	Non-responsive targets	x	x
tyra-3	0.118457	-0.352208	-0.645376	Non-responsive targets	x	x
F28F5.6	-0.496856	-0.580505	-0.653015	Non-responsive targets	x	x
pag-3	0.13794	-0.467134	-0.665107	Non-responsive targets	x	x
F57B1.6	1.11931	-0.641579	-0.683921	Non-responsive targets	x	x
daf-28	0.164086	-0.194285	-0.699849	Non-responsive targets	x
col-186	-0.701574	-0.638598	-0.715234	Non-responsive targets	x	x
R13.2	-1.65503	-0.131179	-0.75707	Non-responsive targets		x
nas-7	-0.192345	-0.711689	-0.770263	Non-responsive targets	x	x
ZK863.1	0.53877	-0.0726382	-0.808881	Non-responsive targets	x	x
K02A2.5	0.156934	-0.332372	-0.929793	Non-responsive targets	x	x
B0462.4	-0.792892	-0.650239	-0.950391	Non-responsive targets	x
C48C5.3	0.110164	-0.717915	-0.970985	Non-responsive targets	x	x
C08H9.15	-0.868577	-1.16297	-0.978593	Non-responsive targets	x
Y57G11C.42	-0.326103	-1.09594	-0.979671	Non-responsive targets	x	x
ram-2	-0.623275	-0.848959	-1.03014	Non-responsive targets	x
grl-4	-0.354465	-1.17893	-1.0664	Non-responsive targets	x	x
Y38E10A.15	-2.1675	-0.622926	-1.07373	Non-responsive targets	x
K03A11.6	0.152769	-0.64135	-1.10947	Non-responsive targets		x
ugt-8	-0.0866339	-1.09414	-1.1142	Non-responsive targets	x	x
fat-5	-0.0211019	-1.41184	-1.13151	Non-responsive targets	x
nspb-6	-0.567718	-1.35402	-1.16147	Non-responsive targets	x	x
T27A1.5	-0.336331	-1.08772	-1.28405	Non-responsive targets	x	x
end-1	-3.02514	-2.13519	-1.49341	Non-responsive targets	x
dct-5	-0.661486	-1.38225	-1.63116	Non-responsive targets	x	x
B0410.3	-0.610291	-1.04693	-1.75765	Non-responsive targets	x	x
otpl-7	0.459516	-1.11564	-2.21	Non-responsive targets	x	x
aat-7	-0.725986	-2.25627	-2.23823	Non-responsive targets	x
Y73F8A.32	-3.2426	-3.50102	-2.38514	Non-responsive targets	x
F12A10.9	-0.377411	-0.175588	-2.55634	Non-responsive targets	x	x
