# Supplementary material for: Cooperative target mRNA destabilization and translation inhibition by miR-58 microRNA family in C. elegans
Source: HighWire-hosted journal article supplement (doi:10.1101/gr.183160.114), 2015-07-31
Supplement: Supplemental_Table_3.xlsx [file Supplemental_Table_3.xlsx]

## Sheet: Protein vs. RNA comparison
Gene public name	log2 fold change protein (mir-58.1 / WT)	log2 fold change protein (mir-80; mir-58.1 / WT)	log2 fold change protein (mir-80; mir-58.1; mir-81-82 / WT)	Protein quantification method	log2 fold change mRNA (mir-58.1 / WT)	log2 fold change mRNA (mir-80; mir-58.1 / WT)	log2 fold change mRNA (mir-80; mir-58.1; mir-81-82 / WT)		Category	Color code	Differential expression boundaries	Target number in mir-58.1	Target number in mir-80; mir-58.1	Target number in mir-80; mir-58.1; mir-81-82
osm-11	0.602478	0.697415	1.04854	SILAC fractionated	0.244455	0.151758	0.993639		1	yellow	log2 fold change protein > 0.05, log2 fold change mRNA < 0.05	10	1	2
cgh-1	0.0854591	0.28446	0.331166	SILAC unfractionated	-0.167689	0.98403	0.970472		2	green	log2 fold change protein (P) > log2 fold change mRNA (R); P, R > 0	18	20	15
snr-6	0.320133	0.722262	1.06456	SILAC unfractionated	-0.0853846	0.241595	0.240594		3	blue	log2 fold change protein = log2 fold change mRNA (0.1 fold tolerance)	14	12	10
rsp-1	0.24485	0.407867	0.497629	SILAC fractionated	-0.0545663	0.291829	0.321305		4	purple	log2 fold change mRNA > log2 fold change protein	11	26	30
ivd-1	0.155616	0.370605	0.44745	SILAC unfractionated	0.133837	0.476643	0.363524		5	orange	log2 fold change protein, log2 fold change mRNA < 0.05	5	1	1
cah-5	0.272062	0.468005	0.816341	SILAC fractionated	0.331487	0.513892	0.438526		6	gray	NA	5	3	5
R11A8.5	0.204379	0.429997	0.539091	SRM	0.262354	0.575726	0.506585
daf-21	0.132955	0.256455	0.389595	SILAC unfractionated	0.190231	0.603206	1.0295				Differential expression boundaries	Target response in mir-58.1 (%)	Target response in mir-80; mir-58.1 (%)	Target response in mir-80; mir-58.1; mir-81-82 (%)
lys-1	0.633636	0.952706	1.32525	SILAC unfractionated	0.611749	1.66641	2.21027				log2 fold protein (P) > log2 fold RNA (R) (Category 1 and 2)	48.2759	35	29.3103
C37H5.13	0.370559	1.11757	1.44419	SILAC fractionated	0.297732	1.03352	1.27145				Translational Inhibition (P > 0.05, R < 0.05) (Category 1)	17.2414	1.66667	3.44828
htz-1	0.341993	0.542797	0.686885	SILAC fractionated	0.164676	0.427037	0.608379				Concordant protein and RNA (P=R, 0.1 fold tolerance) (Category 3)	24.1379	20	17.2414
rpa-1	0.523789	1.27501	1.56039	SRM	0.445505	0.891704	1.03827				log2 fold RNA (R) > log2 fold protein (P) (Category 4)	18.9655	43.3333	51.7241
top-2	0.498301	0.642696	0.954931	SILAC fractionated	0.121103	0.926619	1.1517
ZK616.4	0.546703	1.20009	1.38261	SRM	0.392721	0.922498	1.28964
dpy-28	0.48726	1.1707	1.23377	SRM	0.575295	1.31743	1.53153
hsp-1	0.0799824	0.170819	0.223708	SILAC unfractionated	-0.0862059	0.110557	0.0353658
gpb-1	0.51948	0.506325	0.524919	SILAC unfractionated	0.382038	0.384933	0.370962
tag-72	0.647383	0.385066	0.505718	SILAC fractionated	0.108987	0.508024	0.829402
elo-3	0.765426	0.192057	0.321688	SILAC fractionated	0.255244	0.524936	0.739841
mcm-7	0.405984	-0.153205	0.200669	SILAC fractionated	0.117453	0.421055	0.84409
rnr-2	0.328612	0.332516	0.249314	SILAC fractionated	0.713199	0.964797	1.15923
dnj-20	0.466551	0.733552	0.617362	SILAC fractionated	0.705425	1.17756	1.12491
F59A3.3	0.512274	0.646618	0.229981	SILAC fractionated	0.173895	0.524359	0.436425
lys-2	0.442225	0.740602	0.31409	SILAC fractionated	1.40006	2.65297	1.98711
snr-3	0.241651	0.780964	0.496441	SILAC unfractionated	-0.0532747	0.205611	0.272507
F08G12.2	0.117669	1.18085	0.77565	SILAC fractionated	0.0378467	0.271447	0.589828
F26B1.2	0.0746015	0.265205	0.234335	SILAC fractionated	-0.034329	0.358049	0.422842
pcn-1	0.181437	1.07167	0.984124	SILAC fractionated	0.213532	0.814727	1.15465
F56D3.1	0.419025	0.707819	0.187214	SRM	0.287959	0.67946	0.747162
isw-1	0.466073	1.07043	0.945977	SRM	0.43982	1.12464	1.37823
tag-170	0.253056	0.581656	0.467033	SILAC fractionated	0.124822	0.324716	0.566494
ZK418.9	0.794709	1.55466	0.758722	SRM	0.20248	0.573219	0.686121
F27C1.2	1.19076	1.67575	1.1435	SRM	0.475512	0.858496	1.32146
ife-3	0.235903	0.645615	0.647125	SRM	0.0945001	0.60841	0.657675
mep-1	0.397374	0.649862	0.32898	SILAC fractionated	0.251417	0.726933	0.972465
unc-45	0.458905	0.632641	0.504866	SRM	0.000658577	0.0226002	-0.0267251
cra-1	0.141268	-0.0336153	0.292304	SILAC fractionated	0.442555	0.567821	0.433764
mcm-3	0.0752385	-0.0960434	0.50262	SILAC fractionated	0.299025	0.801534	0.929801
ubq-1	0.157987	0.160374	0.315557	SILAC unfractionated	0.289169	0.603893	0.767025
C32E8.3	0.540676	0.417835	0.735497	SILAC fractionated	0.246956	0.51815	1.2405
F40F8.5	1.33334	1.3192	4.02688	SRM	0.170968	0.475908	0.786656
K08F4.2	-0.273206	0.127173	0.165972	SILAC unfractionated	-0.0785009	0.459253	0.580911
pgp-9	-0.111695	0.97784	1.10141	SILAC fractionated	0.435039	0.925292	1.01352
fkb-6	-0.516466	-0.214833	0.735318	SILAC unfractionated	-0.312052	0.591507	1.19154
tag-297	-0.388196	0.0324392	0.357829	SILAC fractionated	-0.0108476	0.081463	0.424158
unc-130	NA	NA	3.10074	SRM	0.392428	0.347687	1.29503
hmg-1.1	0.321715	0.257656	NA	SILAC unfractionated	-0.0101303	0.549478	0.965679
pqn-70	NA	0.478024	NA	SILAC fractionated	-0.197725	0.553122	1.00028
snr-1	NA	0.451155	0.446946	SILAC fractionated	-0.00244133	0.118823	0.183963
tag-342	0.836559	NA	1.91984	SRM	-0.283889	0.550817	1.37261
B0336.3	NA	0.268128	NA	SILAC fractionated	0.171586	0.48758	0.61907
his-72	0.405545	NA	NA	SILAC fractionated	0.386173	0.958726	1.36896
gfl-1	NA	1.13708	NA	SRM	0.094509	0.613758	0.99918
F13D12.6	0.301985	0.659295	-0.222809	SRM	-0.011697	0.396965	0.415168
F47B7.2	-0.538178	-0.580066	-1.13205	SRM	0.0394465	0.156388	0.159695
vbh-1	-0.314139	0.0148084	-0.369797	SILAC fractionated	0.134959	0.600293	0.561319
R09B3.3	-0.228468	-0.411409	-0.0850838	SILAC unfractionated	-0.0821357	0.408427	0.514715
F58E10.3	-1.12894	-0.926221	-0.985359	SILAC unfractionated	0.07627	0.320406	0.503256
flh-2	-0.911227	1.46405	-0.643195	SRM	0.552826	1.30287	1.74448
M28.8	0.505525	-1.5183	-0.334992	SRM	0.0312726	-0.0510685	-0.073946
C30B5.7	-1.23559	0.763427	5.37883	SRM	0.862416	0.344441	0.784888
cids-1	0.102695	0.0314602	1.31586	SRM	0.0400773	0.585555	0.938289
C56G2.1	0.12632	0.181547	1.89607	SRM	0.16281	0.383202	0.43055
