# Supplementary material for: Cooperative target mRNA destabilization and translation inhibition by miR-58 microRNA family in C. elegans
Source: HighWire-hosted journal article supplement (doi:10.1101/gr.183160.114), 2015-07-31
Supplement: Supplemental_Table_4.xlsx [file Supplemental_Table_4.xlsx]

## Sheet: Fract. SILAC 1781 Proteins
Protein	log2 fold change protein (mir-58.1 / WT)	log2 fold change protein (mir-80; mir-58.1 / WT)	log2 fold change protein (mir-80; mir-58.1; mir-81-82 / WT)
aagr-2	0.322852	-0.124269	0.143744
aagr-3	0.158623	0.145947	0.299807
aagr-4	0.140994	0.285449	0.401879
aars-2	-0.226701	-0.442273	-0.537964
abce-1	0.0331995	0.162922	0.0595601
abcf-1	-0.193486	-0.564249	-0.229004
abcf-2	-0.192432	-0.081105	-0.278337
abcf-3	-0.0487446	-0.160806	-0.21305
abts-1	0.646998	0.80645	0.516995
AC3.5	-0.178503	-0.482873	-0.960363
acbp-1	0.0871973	-0.241684	-0.199946
acbp-3	0.0877853	-0.00362363	0.177172
acdh-1	-0.204348	-0.46789	-0.907476
acdh-10	-0.00178638	-0.231081	-0.0872103
acdh-11	0.493131	0.806758	0.871582
acdh-12	0.0931962	-0.192468	0.105609
acdh-13	-0.0768083	0.381303	0.00650913
acdh-3	0.185728	0.0888978	0.156129
acdh-7	-0.0141877	-0.117248	-0.0489241
acdh-9	-0.329486	-0.669066	-0.56677
acin-1	-0.0304439	-0.0325236	0.312277
acn-1	-0.282756	-0.393228	-0.324811
aco-1	-0.0522963	-0.152878	-0.126455
aco-2	0.176776	0.198855	0.0973263
acox-1	0.170136	0.319055	0.527455
acp-6	0.400228	-0.139959	-0.761764
acs-1	0.104884	-0.643959	-0.484567
acs-11	0.214239	0.331743	0.38969
acs-13	0.12744	-0.0263406	-0.0199034
acs-14	0.0539744	0.464576	0.620981
acs-17	0.311596	-0.0216515	-0.163536
acs-19	0.00663055	-0.643926	-0.84361
acs-22	-0.227764	-0.670138	-0.812403
acs-4	0.410755	0.48892	0.610391
acs-5	-0.185271	-0.207935	-0.136208
act-4	0.262728	0.11929	0.13592
act-5	0.204396	-0.0100616	0.282389
adr-1	0.288192	0.281255	0.387005
ads-1	0.185786	-0.161267	0.183288
agl-1	0.379705	-0.0700078	0.327733
ahcy-1	-0.286415	-0.282426	-0.620625
ain-1	0.23618	0.606403	0.0449978
aipl-1	-0.0172372	-0.169036	-0.227568
ajm-1	0.193098	-0.128804	0.625271
aldo-1	0.676416	0.669509	0.876507
aldo-2	0.0319826	-0.0561557	-0.104876
alg-1	0.253869	0.275767	0.37854
alh-1	0.252891	-0.0944747	0.0213302
alh-12	0.0357223	-0.153644	-0.252606
alh-13	-0.229892	-0.175062	-0.313252
alh-3	0.149563	0.0224996	0.178494
alh-4	0.254535	0.0455532	0.124205
alh-6	-0.0942416	-0.2002	-0.206389
alh-7	-0.194713	-0.0696606	-0.083094
alh-8	-0.160764	-0.18299	-0.508981
alh-9	-0.172307	-0.138189	-0.169732
alp-1	-0.19507	-0.39995	-0.544322
alx-1	0.110323	0.187437	0.448678
aly-1	0.538602	0.334393	0.530261
aly-3	0.0579174	0.139771	0.539288
ama-1	-0.081618	-0.0180663	0.1826
aman-2	0.17292	0.299813	0.360879
anc-1	0.259877	0.24775	0.428301
ant-1.1	0.110748	0.00906491	0.0969561
ant-1.2	0.0578017	0.198647	0.0116386
apa-2	0.0613084	0.0701069	-0.130431
apb-1	-0.0520806	-0.00643136	0.167148
apg-1	0.182496	1.3692	0.826966
apm-1	-0.0910942	-0.236647	-0.217247
app-1	-0.143119	-0.345936	-0.419149
apy-1	-0.365446	-0.149731	-0.0642219
aqp-2	0.728291	0.45405	1.05945
aqp-7	0.0839132	0.106874	0.352112
ard-1	0.343571	0.327247	0.2007
arf-1.2	-0.0222731	-0.105059	0.0962248
arf-3	-0.0710509	-0.274543	-0.00654292
arp-1	0.170749	0.302266	0.369896
arrd-25	0.244866	0.323224	0.590441
art-1	0.169895	0.112741	0.322228
arx-1	-0.0990895	-0.111636	0.0796478
arx-2	0.204268	0.168255	0.257559
arx-3	0.0336539	0.0114426	0.15034
arx-4	0.100859	0.22775	0.249164
arx-6	0.00586601	0.36938	0.0997156
asb-1	0.35661	0.63582	0.300525
asb-2	-0.109714	-0.0226138	0.036342
asg-1	-0.384298	-0.154131	-0.322576
asg-2	-0.0863402	-0.176045	-0.170532
asna-1	-0.382335	0.0687482	0.020783
asp-1	0.249271	-0.263247	-0.124219
asp-2	-0.00805677	-0.276143	-0.240313
asp-3	0.125933	-0.374459	-0.175384
asp-4	0.0917672	-0.247859	0.145189
asp-5	0.127918	-0.386071	-0.182762
asp-6	0.361334	-0.255964	0.117927
atad-3	-0.277171	-0.187021	-0.325855
atgp-1	0.128904	0.200149	0.537788
atgp-2	0.0328194	0.0399198	-0.382319
atn-1	-0.00939721	-0.125261	-0.154659
atp-2	0.124182	-0.0481659	-0.0856995
atp-3	-0.27492	0.00629354	-0.0267011
atp-4	-0.0746558	-0.212723	-0.155255
atp-5	-0.186613	-0.149167	-0.171966
atx-2	0.0800007	-0.233087	-0.0593247
B0205.6	-0.170429	-0.52666	-0.0366778
B0228.7	-1.45202	-1.7879	-1.62632
B0238.11	0.731275	0.526176	0.442954
B0250.5	-0.236182	-0.424739	-0.713209
B0272.3	0.0862179	0.0433266	-0.0597413
B0286.3	-0.229015	-0.746013	-0.835723
B0303.3	-0.123801	-0.0509487	0.0342038
B0334.3	0.319511	0.407278	0.667565
B0395.3	-0.00545386	0.639727	-0.703646
B0491.5	-0.119472	-0.262321	-0.0386123
B0495.7	-0.235769	-0.113599	-0.189398
B0511.6	-0.41702	-0.088445	-0.470296
B0513.5	0.380394	0.309547	-0.0857945
B0546.1	0.142298	0.153246	0.148844
B0564.7	0.245766	0.216157	0.0580696
baf-1	0.0101164	0.125669	0.25346
bca-1	-0.0261469	0.378737	-0.569149
bcat-1	-0.0599999	0.275979	0.213746
ben-1	0.671842	0.164903	0.680927
bicd-1	0.242074	0.215158	0.272099
bre-1	0.292666	0.100414	-0.103236
bub-3	-0.00287416	0.0159441	0.234131
byn-1	-0.0265647	-0.359378	-0.430757
C01B10.11	-0.0728923	-0.443291	-0.349902
C01B10.3	0.257487	0.153311	0.697251
C01B10.8	-0.433081	0.035686	-0.34275
C01F1.3	-0.134099	-0.136097	-0.317149
C01G10.8	0.401875	0.487516	0.410438
C01G10.9	-0.300857	-0.214617	-0.480887
C02D5.4	0.113948	0.188609	0.57575
C04C3.3	0.146539	-0.146095	-0.0208014
C05C10.3	0.17081	0.0852284	-0.20871
C05C8.7	0.222219	-0.212587	-0.470655
C05D11.1	0.126853	0.15863	0.122363
C05D11.10	-0.332806	-0.209904	-0.25826
C05D12.3	0.216082	0.37463	0.26495
C05G5.4	-0.0387796	0.140981	0.263414
C06A6.4	0.378934	-0.0412438	0.0294775
C06A6.5	0.336788	0.426223	0.0808171
C06A8.1	-0.319585	-0.166706	-0.645287
C06A8.3	0.0075711	-0.0809159	-0.0313834
C06G3.5	0.0295597	0.210597	0.388869
C06G3.9	0.0236362	0.278161	0.164383
C07A12.7	0.316213	0.385961	0.520786
C07D8.6	0.164135	0.047595	-0.0185186
C08H9.2	-0.171582	-0.116841	-0.197346
C09F9.2	-0.431415	-0.54469	-0.506823
C09G9.2	0.0821469	0.0143081	0.545774
C10C6.6	0.259987	-0.202714	0.018824
C10E2.6	0.179704	0.131422	-0.138992
C10G11.7	-0.0776093	0.251836	0.700528
C11D2.7	-0.0616043	0.588532	0.0988096
C12D12.1	-0.0185538	-0.382255	0.0842299
C12D8.1	0.242133	-0.133905	0.531629
C13B9.3	-0.0436375	0.24298	-0.0288092
C14A4.14	0.0930689	-0.0140249	-0.402817
C14B9.2	0.495891	0.519301	0.819337
C14C10.4	0.218943	0.0915672	0.141753
C14C10.5	-0.41483	-0.10118	-0.0625837
C14F11.1	0.163192	-0.04444	-0.0798914
C14F11.6	-0.525547	-0.271958	-0.0160453
C14H10.3	-0.376686	-0.925144	-0.234055
C15C7.5	-0.408263	-0.756323	-0.409762
C15H9.7	0.0201556	0.333651	0.338394
C15H9.9	0.338468	0.317484	0.551593
C16A3.10	-0.00349926	0.598401	0.83057
C16A3.4	-0.0602572	-0.377186	0.0634364
C16A3.5	-0.243339	0.0888679	-0.0128686
C17B7.2	0.0423115	-0.651215	0.66274
C17G1.7	-0.0937654	0.0706759	-0.00554215
C17G10.9	-0.236642	-0.0768598	0.0212789
C18B2.3	-0.201817	0.515635	-0.388784
C18B2.5	0.326047	-0.27451	-0.0872646
C18E9.4	0.0387506	-0.0054684	0.120994
C18H9.3	0.0515338	0.0965531	0.163007
C23G10.2	-0.22351	-0.349907	-0.0828513
C24G6.8	-0.140821	-0.199842	-0.378555
C24H12.4	0.245315	-0.175252	-0.0762668
C25A1.13	-0.397041	0.0820995	-0.20628
C25A1.4	-0.420045	-0.0201702	-0.0987671
C25A1.6	-0.717565	0.23368	0.0193249
C26B9.3	-0.47635	-0.37339	-0.810317
C26B9.5	0.744463	0.144283	0.204969
C26E6.6	-0.407437	-0.509557	-0.140478
C28H8.11	0.392928	0.334602	-0.144364
C28H8.3	0.00852214	-0.0709474	-0.0321389
C29F7.2	0.0864732	-0.656574	-0.20845
C29F7.3	-0.0708309	-0.177815	-0.196752
C30C11.4	0.0991489	0.183843	0.215814
C30H6.7	0.111271	0.356554	0.182854
C30H7.2	-0.158198	-0.161499	-0.0480396
C31C9.2	-0.454818	-0.856437	-1.09222
C31E10.7	0.384907	-0.288961	1.0517
C32A3.2	-0.674516	-0.491704	-0.615539
C32D5.8	0.419893	0.573295	0.897948
C32E8.3	0.546016	0.424001	0.782919
C32E8.9	-0.0270904	0.179753	-0.121007
C32F10.8	0.280428	-0.00607418	-0.162877
C33A12.1	0.00971439	-0.0467376	-0.0900949
C33F10.14	0.0215312	0.310426	0.3862
C34B2.6	-0.288216	-0.149392	-0.0364335
C34B2.8	0.195897	-0.253767	0.099344
C34C12.8	-0.154235	-0.419754	-0.227274
C34E7.4	-0.625296	0.0947929	-0.897513
C34F11.3	-0.116306	0.0726476	0.190901
C35A5.8	0.082234	0.258969	0.0723313
C35B1.5	0.0984422	0.0849208	0.144486
C36A4.4	0.0197284	0.292811	-0.0158579
C37A2.7	-0.110295	-0.353516	-0.179163
C37C3.2	-0.411126	-0.313786	-0.271056
C37E2.1	-0.0348549	0.0942337	0.06002
C37H5.13	0.375899	1.12373	1.49161
C37H5.6	0.355098	0.585148	0.527347
C39H7.4	-0.0491476	-0.0758733	0.440316
C41G7.9	0.246899	0.693173	0.67345
C42C1.11	-0.36651	0.0391921	-0.26404
C43E11.9	-0.0008177	-0.0609915	-0.0754244
C44B7.10	0.127195	-0.225747	-0.33093
C44E4.4	-0.0317021	0.073733	-0.0628722
C46C2.2	0.424627	0.261198	0.946575
C48B4.1	0.391846	-0.301436	-0.382275
C48E7.1	0.20745	0.139667	-0.0465744
C49C3.4	0.192478	-0.160282	0.168257
C49F8.3	0.0769886	0.208427	0.244541
C49G7.3	0.0304964	-0.223117	-0.494966
C50F2.3	0.622692	0.481884	0.813824
C50F7.4	-0.461641	-0.21127	-0.0494649
C53C9.2	0.250404	0.189742	0.207224
C53H9.2	0.738299	0.695034	0.680721
C55F2.1	-0.170209	-0.268489	-0.0695775
C56G2.1	0.593019	0.265106	0.630455
C56G2.7	-0.00390493	0.431111	0.0200927
cah-3	0.0796231	0.127505	0.575834
cah-4	-0.60785	0.0113773	-0.471719
cah-5	0.277402	0.47417	0.863763
calu-1	0.131786	0.241627	0.315881
cand-1	-0.0710627	0.0673161	0.166249
cap-1	0.246429	0.130145	0.326857
cap-2	0.183079	0.286646	0.264438
car-1	0.369187	0.767712	0.716289
cars-1	0.0796172	-0.0865971	-0.143053
cas-1	-0.185153	0.278801	0.291544
cash-1	1.0013	0.757648	0.72623
ccg-1	0.583643	0.329173	0.342489
cchl-1	-0.344633	-0.258121	-0.164834
cco-1	-0.0382262	-0.17843	-0.04375
cco-2	0.0817339	0.22057	0.0576365
cct-1	0.0475709	0.165707	0.155956
cct-2	0.082321	0.124935	0.16576
cct-3	-0.0719837	0.0322234	0.0980676
cct-4	-0.0953592	0.103446	0.0233674
cct-5	0.215635	0.205892	0.170417
cct-6	-0.0577544	0.0557101	0.0280338
cct-7	0.00239545	0.0750458	-0.00449832
cct-8	0.0202511	0.0805386	0.086104
cdc-37	-0.424908	0.0702769	-0.156
cdc-42	0.552104	0.0108459	0.291488
cdc-48.1	0.193763	0.15089	0.37628
cdc-48.2	0.203597	0.366896	0.336432
cdd-1	0.0714806	0.0813739	0.15082
cdd-2	-0.327554	-0.665919	0.00773093
cdk-1	-0.346552	-0.171899	-0.191012
cdr-4	-0.0539943	0.778625	0.611081
cdr-6	0.490801	0.171765	0.0617512
cec-1	0.602881	0.490345	0.809912
ced-10	0.13149	0.65256	0.164198
cee-1	0.00841714	-0.0333249	-0.146
cey-1	0.105992	-0.483378	-0.303142
cey-2	0.336807	1.15145	0.591921
cey-4	-0.100747	-0.0962983	0.0392035
cgh-1	0.0657531	0.338121	0.413114
cgp-1	0.960507	1.18792	1.25164
chc-1	-0.0359566	0.0432752	0.12637
chch-3	-0.12259	-0.269106	-0.498725
cif-1	-0.206064	-0.0521236	-0.125448
clec-150	-0.0198379	-0.421284	0.0811405
clec-41	-0.392517	-0.16464	0.262735
clec-50	0.174322	0.359333	0.435016
clec-63	0.490446	0.321082	0.7595
clec-65	0.110716	-0.0126754	-0.187204
clic-1	-0.0733707	-0.358557	0.158143
clp-1	0.490143	0.490961	0.594327
clp-7	0.18175	0.575893	0.507287
clpf-1	0.556127	0.695007	0.802756
cls-2	0.471937	-0.275754	0.356789
clu-1	-0.000574443	-0.251784	-0.544674
cmd-1	0.0886976	0.101184	-0.0600841
cnb-1	0.457072	0.38061	0.510049
cnx-1	-0.353234	-0.232093	0.0182012
col-109	-0.316478	0.172544	-0.215268
col-133	-0.165602	-0.733056	-1.36126
col-41	-1.17086	-1.70301	-1.1772
col-43	-0.316478	0.172544	-0.215268
col-73	-0.687233	-0.586682	-0.642162
col-90	-0.320862	-1.4296	-0.891803
col-92	-0.165602	-0.733056	-1.36126
col-93	-0.165602	-0.733056	-1.36126
col-94	-0.165602	-0.733056	-1.36126
col-97	-0.316478	0.172544	-0.215268
coq-5	0.121508	-0.367222	-0.0589844
coq-8	-0.497225	-0.454823	-0.742718
cor-1	-0.084083	0.0766838	-0.0576077
cpf-2	0.354686	0.39904	0.812808
cpi-2	0.399204	0.142229	0.689258
cpl-1	-0.453006	-0.75914	-0.531473
cpn-1	0.42798	0.652325	0.80075
cpn-3	0.0730966	0.0312078	-0.0209215
cpn-4	-0.0439992	0.260568	0.067181
cpna-2	0.0305806	-0.0243934	-0.233575
cpr-1	1.1976	1.25251	1.74541
cpr-4	0.738482	0.587486	1.19391
cpr-5	-0.549974	-0.170126	0.109778
cpr-6	0.184415	-0.0785265	-0.383029
cpt-1	0.267427	-0.23228	0.198654
cpt-2	-0.108319	-0.341191	-0.689185
cpz-1	-0.507229	-0.298087	-0.18452
cpz-2	-0.251853	-0.616847	-0.223896
cra-1	0.146608	-0.0274498	0.339726
cri-2	-0.545736	-0.330706	-0.577172
cri-3	-0.0781456	-0.114431	-0.164163
crn-2	-0.252759	-0.281833	-0.266662
crt-1	-0.144749	-0.18685	-0.0867196
csn-1	0.401947	-0.405208	0.174338
csn-4	-0.0932108	0.49794	0.465004
csnk-1	0.103111	0.137081	0.111954
csq-1	0.0685409	-0.268891	-0.0933605
csr-1	-0.262395	0.618683	-0.109773
ctg-2	-1.34308	0.169284	-0.117779
cth-2	0.396028	0.634299	0.755087
ctl-2	0.428518	0.518691	0.556118
ctl-3	0.88655	0.953172	1.15026
cts-1	0.318133	0.269144	0.329
cuc-1	-0.0482571	-0.0387619	0.474791
cul-1	0.123658	0.470171	0.321637
cyc-1	-0.189106	-0.0466224	-0.217101
cyc-2.1	-0.0917896	-0.0448205	-0.104163
cyn-1	0.0711662	0.277365	-0.0247249
cyn-13	-0.0031221	-0.0716403	0.102248
cyn-15	0.0793299	0.595756	0.100767
cyn-3	0.14912	0.336366	0.446116
cyn-5	0.217028	0.328615	0.371459
cyn-6	-0.458304	-0.738609	-0.922429
cyn-7	-0.28275	0.142137	0.196377
cyp-37A1	0.479613	2.37861	0.369417
D1005.1	0.109764	-0.294275	-0.277557
D1025.2	0.00456367	-0.142326	-0.445075
D1054.8	0.903653	0.715937	0.383987
D2023.5	0.019392	-0.101591	-0.00967121
D2030.2	0.244094	-0.0898014	-0.050327
D2030.4	-1.01855	-0.0339437	-0.782038
D2045.2	0.0289628	0.179724	0.133367
D2063.3	-0.260234	-0.573456	-0.286735
D2092.4	-0.0567523	-0.25212	0.426323
D2096.8	-0.199917	-0.228507	-0.308819
daf-21	0.0940039	0.229203	0.379535
daf-22	-0.0558388	0.0733362	0.204136
dao-2	-0.0827659	-0.217067	-0.385591
dao-5	-0.105235	-0.819641	-0.689515
dars-1	-0.0222506	0.003662	0.176422
dcap-1	0.434719	0.279132	0.482451
dcs-1	0.217034	0.0867972	0.17546
dct-16	-0.0105777	-0.687954	-0.610254
dct-18	0.172378	0.201103	-0.118143
ddb-1	0.34116	0.473198	0.748151
ddo-2	0.557113	0.0406815	-0.197747
ddp-1	0.125991	0.0378537	0.0863363
deb-1	0.461041	0.0469672	0.306744
dhc-1	0.0274113	0.172112	0.392229
dhs-12	0.100815	-0.0268588	0.296856
dhs-13	0.216499	0.153608	-0.325691
dhs-14	0.272915	0.506311	1.40336
dhs-21	-0.200286	-0.0782705	0.441556
dhs-22	0.00560017	-0.0945655	0.218325
dhs-24	0.256912	0.513377	-0.00674095
dhs-25	-0.223709	-0.285116	-0.710306
dhs-28	0.0573988	-0.0274018	0.180991
dhs-3	-0.0195383	-0.660209	-0.613921
dhs-6	0.128973	0.755853	0.741787
dhs-9	0.0453468	-0.0432964	0.0710417
dig-1	0.344631	0.248164	0.528961
dim-1	0.230116	0.100593	-0.0399114
dis-3	-0.0646456	-0.0182219	0.0133967
djr-1.1	-0.0506851	0.024204	0.0944805
dlc-1	0.134415	0.30897	0.387045
dlg-1	0.858688	0.445751	0.806214
dli-1	-0.043895	0.323209	0.48593
dnc-2	-0.0446031	0.149991	0.475675
dnj-10	0.533071	0.115044	-0.302606
dnj-11	-0.30745	-0.0675385	-0.155739
dnj-12	0.0560244	0.0165917	0.314992
dnj-13	0.119429	-0.24319	-0.280186
dnj-19	-0.0718138	0.0431419	0.056829
dnj-20	0.471891	0.739718	0.664784
dnj-29	-0.00544306	0.352989	0.0180801
dnj-7	-0.406953	-0.176955	-0.192316
dod-19	-0.288958	0.0820419	0.296097
dpf-3	0.268294	-0.0262593	0.142271
dpf-4	0.0399976	-0.0202077	0.173193
dpf-5	0.331831	0.277214	0.386865
dpy-11	-0.166125	-0.15648	-0.211941
dpy-18	-0.304913	-0.172674	-0.401505
dpy-30	0.21289	-0.136647	0.464783
dpy-5	-0.527356	-1.18023	-1.49947
dpyd-1	0.0893949	0.120086	0.140386
drp-1	0.0694024	0.668204	0.883241
drr-2	0.159382	0.0714614	-0.175474
dsc-4	0.336034	0.197478	0.344195
dss-1	0.0690148	0.45359	0.192548
dur-1	0.108869	-0.593438	0.533904
dyci-1	0.162316	0.293821	0.401024
dylt-1	-0.110079	0.314321	0.243391
dyn-1	0.218548	0.17072	0.236317
E01A2.1	0.127821	0.0464401	-0.0246526
E01A2.2	0.146003	0.263932	0.75313
E02D9.1	-0.0206815	-0.275671	0.274411
E02H1.6	0.146174	-0.0509113	0.138308
E04A4.5	0.29318	0.430229	0.180091
E04D5.1	-0.0954992	0.100648	0.401993
ears-1	-0.120669	0.0147508	0.00562953
eat-3	0.566451	0.519321	0.412126
eat-6	0.298293	0.190896	0.43048
ebp-1	0.858471	0.596183	0.667031
ebp-2	-0.416547	-0.0712964	-0.075925
ebp-3	0.858471	0.596183	0.667031
ech-4	-0.13434	-0.0971446	-0.261516
ech-5	-0.37253	-0.338382	-0.49288
ech-6	0.0718081	-0.166885	-0.324655
ech-7	0.604286	0.246633	0.349992
eef-1A.1	-0.102008	-0.00840206	-0.183153
eef-1A.2	-0.102008	-0.00840206	-0.183153
eef-1B.1	-0.256072	-0.339805	-0.289819
eef-1B.2	-0.191716	-0.154556	-0.204444
eef-1G	-0.0809948	-0.0660576	-0.208098
eef-2	-0.135357	-0.0680209	-0.099372
eel-1	-0.108737	0.179713	0.0568196
eftu-2	0.187043	0.195526	0.280762
egl-30	0.74661	0.336182	0.0133708
egl-4	0.0973703	0.128648	0.193231
egl-45	-0.00948673	-0.024894	-0.082982
eif-1	-0.23006	0.0330197	0.133104
eif-1.A	-0.456544	-1.09204	-0.885832
eif-3.B	-0.105504	0.0518237	-0.0255034
eif-3.C	-0.0530794	0.0344086	-0.194838
eif-3.D	-0.043087	-0.179006	-0.234341
eif-3.E	-0.115812	-0.122141	-0.0793211
eif-3.F	-0.0154071	-0.0865277	-0.127803
eif-3.G	-0.366092	0.224734	-0.17109
eif-3.H	-0.335896	-0.0258484	-0.0634113
eif-3.I	-0.0523955	0.122112	0.0442503
eif-3.J	-0.483558	-0.447177	-0.28912
eif-3.K	-0.116497	-0.0013832	-0.0305855
eif-6	-0.0998158	-0.00698626	-0.137102
elb-1	0.0880117	-0.116278	-0.155793
elc-1	-0.0177805	0.231555	0.34071
elo-1	-0.391912	-0.422877	-0.572341
elo-3	0.770766	0.198223	0.36911
emb-4	0.32413	0.163079	0.45358
emb-5	-0.344724	-0.0722856	0.277442
emb-8	0.220161	0.207445	0.214071
enol-1	0.279643	0.239758	0.342654
epi-1	0.268149	0.175516	0.196846
epn-1	-0.143485	-0.0742041	-0.0467474
eps-8	0.252553	0.322923	0.468766
erm-1	-0.166777	-0.124314	-0.0418983
F01F1.9	-0.187484	-0.162963	-0.0217012
F01G4.6	0.207779	0.0762833	0.0320953
F02A9.4	-0.0459222	-0.164434	-0.364589
F02E9.1	0.0387407	-0.29144	-0.318422
F02E9.9	0.126156	0.0109556	-0.169111
F07A11.2	-0.218788	0.146702	0.0020558
F07F6.4	-0.142755	-0.17122	-0.00101498
F08A8.2	-0.0297222	-1.76694	-1.49433
F08B12.4	0.320471	0.789857	0.586766
F08C6.2	0.29522	-0.179156	-0.0853875
F08D12.1	0.00806474	0.110996	0.264387
F08F3.4	-0.38806	-0.545889	-0.560712
F08G12.2	0.123009	1.18702	0.823072
F09B12.3	-0.0809203	-0.59764	-0.520424
F09E5.3	-0.042956	-0.0623279	-0.193703
F09E5.8	-0.402489	-0.555949	-0.0739575
F09E8.2	-0.482568	-0.523749	-0.108499
F09F7.4	-0.941684	-1.16854	-1.75609
F09G2.9	0.139443	0.436164	0.106596
F09G8.3	-0.165242	-0.0954872	-0.116565
F10F2.2	-0.0711217	0.0408207	-0.122627
F10G2.1	-0.200928	-0.127217	-0.343534
F10G8.6	0.383202	0.799592	0.326355
F11A10.7	-0.581031	-0.776243	-0.958926
F11C1.5	-0.57622	-0.635661	-1.24002
F13C5.2	1.07437	0.613319	1.22104
F13D12.6	0.0299754	0.158755	0.292505
F13E6.1	0.113469	0.00509592	-0.0257927
F13H10.8	-0.580936	-0.804727	-0.572643
F13H6.3	0.562925	0.867139	0.919833
F14E5.2	-0.0415855	-0.0313888	-0.0993013
F15B9.10	0.41557	0.922553	0.851241
F15C11.2	-0.116409	-0.0232304	0.0620899
F15E11.1	0.928921	-2.61978	-1.84459
F15E11.13	0.656408	-2.74745	-2.09773
F17A9.4	0.259289	-0.200725	-0.0220101
F19C7.1	-0.0328793	-0.239704	-0.0415672
F20D1.3	0.1439	0.278002	0.557113
F20D6.11	0.530762	0.356361	0.124512
F20G2.2	0.313738	0.301255	0.452722
F21C10.7	0.0757646	-0.483179	0.103573
F21D5.7	0.205749	0.291144	0.0769508
F21H12.6	-0.338897	-0.201143	-0.333073
F22F7.1	-0.167873	-0.879467	-1.0255
F23B12.5	0.281707	0.325373	0.270061
F23B12.7	0.0288894	-0.0634263	-0.0284986
F23C8.5	0.0180277	0.123187	0.0644683
F23C8.6	0.209087	-0.0603703	0.437186
F23H11.3	-1.03292	-0.569501	-1.09347
F25B4.1	-0.0103185	-0.132799	-0.307831
F25H2.5	-0.0779743	0.102895	0.0159237
F26B1.2	0.0799414	0.27137	0.281757
F26G1.5	0.0939688	0.23364	0.16731
F26H9.5	-0.192819	-0.629638	-1.33887
F27D4.1	0.203901	-0.0299951	0.0249957
F27D4.4	0.0999034	0.0812799	-0.140121
F28A12.4	0.218364	-0.727183	-0.827615
F28B4.3	0.0569042	-0.00278568	0.38543
F28C6.8	-0.190728	-0.00503754	-0.00756523
F28H7.3	0.136332	0.526268	0.611488
F29B9.11	-0.712912	0.416686	-0.647352
F29C12.4	-0.169303	-0.030706	-0.286304
F29C4.2	0.0761392	0.0627834	0.0617762
F29C4.7	0.0647101	0.262939	0.120362
F29G6.3	0.188733	0.0594318	0.196834
F30H5.3	-0.130412	-0.542506	-0.352178
F32A11.1	-0.130596	0.0674993	0.394722
F32A5.3	0.384785	-0.0344471	0.108941
F32A7.5	0.155958	0.336316	0.793769
F32B5.1	0.0664742	0.134209	-0.0995073
F32B6.2	-0.258913	-0.402785	-0.47294
F32D1.2	-0.590094	0.734816	0.500736
F32D1.5	-0.324818	-0.147373	-0.384937
F33D11.10	0.0535665	0.156003	0.336624
F33D4.5	0.320045	0.179739	0.119666
F33D4.6	-0.370327	-0.900591	-1.39892
F35D11.4	0.0319144	0.330709	-0.106792
F35F11.1	0.0720576	0.0556102	0.885722
F35G12.2	-0.0338656	-0.181196	0.0705329
F35G2.2	0.0889375	0.113236	0.0952533
F36A2.7	0.200175	0.103287	0.120432
F37C4.5	0.171908	0.239402	0.337557
F37H8.5	-0.0391883	-0.0474197	0.128214
F38A1.8	0.0963361	0.526438	-0.112122
F38A5.1	0.221829	-0.0829167	-0.0458037
F38B2.4	0.187578	-0.0620256	-0.159239
F38E11.5	-0.11633	-0.0540549	0.0316997
F38E9.5	0.282742	0.281236	0.429261
F40A3.3	0.232421	0.226171	0.362649
F40A3.6	0.0444148	-0.134709	0.0979411
F40F4.6	0.230625	-0.159957	0.070916
F41C3.5	-0.376305	-0.405404	-0.790518
F42A10.5	-0.0171297	-0.193015	-0.389923
F42C5.10	0.335102	0.0702608	0.0547496
F42C5.9	0.0535791	0.233423	0.417572
F42G8.10	0.134479	0.0801329	-0.119409
F42G9.1	0.174431	0.384272	0.534173
F43D9.3	0.101581	0.0480652	0.22051
F43E2.7	0.242957	0.224315	0.275491
F43G9.1	0.172632	0.0462216	-0.0282285
F44E2.4	-0.194107	-0.167604	-0.156876
F44E5.1	-0.112375	0.141061	0.0629137
F44E5.4	0.395651	0.330043	0.206083
F44E7.4	0.250411	0.344659	0.313298
F45G2.4	-0.154726	-0.181936	0.376447
F45H10.2	-0.0129463	0.285418	0.223665
F45H10.3	-0.0984452	0.0687449	0.0641072
F46G10.1	0.17186	-0.127658	0.0402514
F46H5.3	0.239556	0.240525	0.0318353
F46H5.7	0.396515	0.233563	0.210377
F47B10.1	0.000273203	0.00287122	0.162766
F47B10.2	-0.273999	-0.706459	-0.309104
F47G9.1	0.406058	0.0899976	0.19339
F48E3.3	-0.0576358	-0.139182	-0.0922549
F48E8.3	0.257954	-0.152989	0.136052
F49C12.11	-0.237853	-0.0979287	-0.0675051
F49C12.7	0.13495	-0.198108	-0.745265
F49D11.10	0.17708	0.182091	0.123423
F49E2.2	0.385168	-0.206394	0.832925
F49E2.5	0.253471	0.0840796	0.457782
F49H12.5	-0.259262	0.00603126	0.00743664
F52A8.5	-0.202448	-0.113316	-0.171227
F52B11.2	0.169601	0.416212	0.162795
F53A2.7	0.103852	0.319595	0.174832
F53B1.4	-1.08648	-0.787278	-0.819276
F53B3.6	0.393353	0.439409	0.447635
F53C11.3	0.353123	0.30556	0.20788
F53F1.2	0.0336245	0.0875034	-0.268194
F53F1.3	-0.268246	-0.0648689	-0.123526
F53F4.10	0.116515	-0.107118	0.0774696
F53F4.11	-0.375749	-0.373635	-0.383554
F53F4.13	-0.103526	-0.0432314	-0.14583
F54A3.5	0.714581	0.35062	0.36171
F54C4.1	-0.201747	-0.746724	-0.779826
F54C8.7	0.35807	-0.405637	0.258084
F54D5.12	0.487476	1.05316	0.296447
F54E2.1	-0.77067	-0.681204	-0.658068
F54F11.2	0.0503808	-0.199591	-0.0334568
F54F3.4	0.46368	0.010328	0.609894
F55A12.8	-0.199663	-0.282534	0.14441
F55A3.3	0.514365	0.427685	0.741722
F55B11.1	-0.112593	-0.0591356	-0.123723
F55C5.8	0.0843608	0.293354	0.299344
F55F10.1	0.166362	-0.0696204	-0.206876
F55F8.2	0.0156338	0.0705721	-0.197129
F55H12.4	0.704823	1.20367	1.41324
F56A4.3	0.439273	0.108165	0.452933
F56A8.3	0.236725	-0.039776	0.186273
F56B3.11	-0.112571	-0.294246	-0.511704
F56D1.3	0.424829	0.379076	0.13199
F56D2.6	0.332882	0.691766	0.808202
F56D3.1	-0.2521	-0.27892	-0.0984169
F56H1.7	-0.552451	-0.129409	-0.18459
F57B10.14	0.0742658	0.0335307	0.113313
F57B10.3	0.575571	0.185796	0.266508
F57B10.5	-0.103032	-0.460908	-0.101486
F57C9.1	0.0882202	-0.610924	-0.333204
F57F4.4	0.0820375	-0.138142	-0.100958
F57F5.1	0.282918	0.0771636	0.12591
F58B3.6	0.661887	0.638646	0.551554
F58E10.3	-0.0247482	0.0923346	0.0825937
F58F12.1	-0.154177	-0.204091	-0.0673159
F58F9.7	0.130429	0.76999	0.712552
F58G11.2	0.0302909	0.296559	0.565928
F59A2.6	0.574159	0.154466	0.608542
F59A3.3	0.517614	0.652783	0.277404
F59B1.2	0.391877	0.552314	0.440208
F59C6.5	0.0806046	-0.134268	-0.205191
faah-1	0.0308641	0.0314619	0.707397
faah-4	0.136513	0.228724	0.201095
fah-1	0.0101009	0.335818	0.271908
far-1	-0.0434782	-0.34584	-0.340859
far-2	-0.513259	-0.217166	-1.05344
far-6	1.51679	-0.0385373	0.184312
fars-1	-0.259515	0.224165	-0.3199
fars-2	-0.217548	-0.0300662	-0.59344
fars-3	0.0136742	-0.0275046	-0.134411
fasn-1	0.0120837	-0.323089	-0.358175
fat-1	-0.414011	-1.15297	-1.2218
fat-2	0.0182546	-0.522795	-0.533384
fat-6	-0.500844	-1.17005	-1.77698
fbp-1	0.267019	-0.00397368	-0.120328
fbxa-64	0.255398	0.704681	0.700063
fbxa-65	-0.211221	0.156922	0.0380146
fib-1	0.148425	0.18026	0.137036
fipr-21	-0.56988	0.209334	-0.273775
fkb-1	-0.036837	-0.0119579	0.100381
fkb-2	0.135688	0.345542	0.465998
fkb-3	-0.31681	0.138507	-0.32116
fkb-4	-0.188126	0.390676	0.301773
fkb-5	-0.428835	-0.35977	-0.425906
fkb-6	-0.0225111	0.694949	1.18977
fln-1	0.0535228	0.068397	-0.136517
fln-2	0.0205221	-0.122622	0.289922
fnta-1	-0.183803	-0.423777	-0.0446888
fntb-1	0.214099	-0.0552642	0.0580148
frm-1	0.678166	0.591999	0.923919
ftn-2	0.202466	0.795476	0.711601
ftt-2	0.425816	0.369134	0.540715
fum-1	0.317723	0.418443	0.361479
fzo-1	0.082827	-0.0304802	0.295086
gale-1	-0.015225	-0.0277704	-0.0162333
gana-1	-0.234953	0.469253	0.472841
gars-1	0.0687536	0.0782078	0.152245
gas-1	0.234524	-0.0173863	-0.0492082
gbf-1	0.0696299	0.00537795	0.175662
gcn-1	-0.0488257	-0.0882658	-0.0109515
gcs-1	-0.245239	-0.331121	-0.4395
gdi-1	0.363705	0.207806	0.414174
gei-15	0.482824	-0.386177	0.0865628
gei-7	0.10081	-0.318019	-0.42947
ger-1	-0.261128	-0.0726939	-0.0191912
gfi-1	0.0820375	-0.138142	-0.100958
glf-1	-0.405712	-0.0106009	0.262884
glh-1	-0.514629	0.228327	-0.114177
glh-2	-0.514629	0.228327	-0.114177
gln-3	0.114238	0.0463075	-0.176982
glrx-10	-0.10213	0.0702725	0.248879
glrx-21	-0.622672	-0.430956	0.0180454
glrx-5	0.245676	0.318041	0.310252
gly-8	-0.767334	0.149846	-0.113489
goa-1	0.455846	0.493635	0.702585
gop-3	-0.131677	0.0874628	-0.368021
gpb-1	0.341689	0.335999	0.725315
gpc-2	0.330801	0.533934	0.550499
gpd-1	0.221802	0.457554	0.291711
gpd-2	0.551432	0.527497	0.76857
gpd-3	0.551432	0.527497	0.76857
gpd-4	0.221802	0.457554	0.291711
gpdh-2	0.0561303	0.409312	0.0760498
gpi-1	0.186834	0.136791	0.0538685
grd-10	0.867911	0.317699	0.80143
grd-14	-0.374337	-0.22633	0.705105
grd-5	-0.72761	0.108422	-0.144523
grl-5	-0.184102	-1.13424	-1.48176
gsk-3	0.160138	0.278404	0.804987
gsnl-1	0.571367	0.119974	0.730542
gsp-1	0.200756	0.145421	0.297238
gsp-2	0.38702	0.211356	0.0489956
gspd-1	0.0875441	0.0897797	0.149107
gsr-1	0.113402	0.0320673	0.148724
gst-1	0.0777699	0.00972742	0.272108
gst-10	0.439273	0.108165	0.452933
gst-12	0.203205	0.321241	0.459497
gst-14	0.203205	0.321241	0.459497
gst-20	0.521946	1.16906	1.49165
gst-26	0.444669	0.410618	0.930595
gst-27	0.334886	0.195525	0.354691
gst-28	0.0977626	0.253021	0.670752
gst-36	-0.121561	-0.168399	-0.267312
gst-39	0.997836	1.63385	2.49748
gst-42	0.55919	0.145487	0.656271
gst-5	0.677483	0.423976	1.14259
gst-6	0.487766	0.548516	1.00589
gst-7	1.11734	0.81889	1.87903
gstk-1	-0.211498	0.167602	0.127046
gsy-1	0.00391106	-0.234156	-0.262618
gta-1	0.249604	0.374997	0.368632
gyg-1	0.0474999	-0.39696	-0.215111
H03A11.2	0.294626	0.326501	0.509573
H06I04.3	-0.0534439	-0.22991	-0.359471
H13N06.4	0.220167	0.711993	0.951449
H17B01.4	0.666068	0.15751	0.547911
H19N07.1	0.0619817	0.22862	0.211041
H24K24.3	0.0743498	0.00232415	-0.00561445
H25P06.1	0.0182249	0.0300048	-0.235058
H28O16.1	0.0911389	-0.0659584	-0.0385211
H34C03.2	-0.207224	-0.247409	-0.266415
H34I24.2	0.162825	0.222112	0.108602
H42K12.3	-0.546121	-0.395073	-0.72935
H43I07.2	-0.272698	-0.204161	-0.0165034
haao-1	0.457538	0.282797	0.222725
haf-4	-0.103143	-0.066227	0.0721336
haf-6	0.243837	0.373009	-0.35257
haf-9	0.0920455	-0.0258561	0.224778
hap-1	0.585625	0.633911	0.741967
hars-1	-0.092	-0.248772	-0.0729895
hecd-1	0.398019	0.087635	0.174672
hel-1	0.166577	0.321016	0.530591
hgo-1	-0.439818	-0.436108	0.200313
him-4	0.270545	0.289028	0.473758
hip-1	0.26691	0.503622	0.759206
hipr-1	0.716366	0.910194	1.40852
his-1	0.53854	0.429673	0.805047
his-11	0.176148	0.466192	0.730102
his-2	0.410885	0.358196	0.54472
his-24	0.839878	0.30131	1.04783
his-39	0.176148	0.466192	0.730102
his-4	0.176148	0.466192	0.730102
his-40	0.410885	0.358196	0.54472
his-41	0.176148	0.466192	0.730102
his-48	0.176148	0.466192	0.730102
hmg-1.1	0.236544	0.585149	0.925513
hmg-11	0.619532	0.691544	1.09248
hmg-3	0.452108	0.274334	0.571009
hmg-4	0.452108	0.274334	0.571009
hmr-1	-2.02354	0.0745833	-0.206138
hpd-1	0.117276	0.333534	0.458077
hrp-1	0.369179	0.168269	0.47927
hrp-2	0.264111	0.354867	0.43801
hrpf-1	-0.282861	-0.068386	0.210587
hrpf-2	0.119503	0.61903	0.10179
hsp-1	0.10461	0.170163	0.21199
hsp-12.2	0.235401	0.116836	0.323917
hsp-17	-0.185769	-0.107718	-0.382685
hsp-25	0.185147	-0.139768	0.0315451
hsp-3	-0.148616	-0.24041	-0.255665
hsp-4	-0.552555	-0.444174	-0.666405
hsp-6	-0.0360248	0.0426214	-0.0335905
hsp-60	0.124753	0.0441536	-0.0244917
hsp-70	0.395651	0.330043	0.206083
htz-1	0.347333	0.548962	0.734307
hum-4	-0.207245	-0.00939836	-0.0699842
hum-5	-0.114125	-0.0629499	0.645191
iars-1	-0.152168	-0.283246	-0.334503
icd-1	0.253986	0.482805	0.165321
idh-1	0.104768	0.183905	0.175589
idh-2	0.0826422	0.0420217	-0.0349554
ifa-1	0.36652	-0.041721	0.184874
ifa-4	-0.0817149	-0.175942	0.013651
ifb-1	0.280162	0.19097	0.273021
ifb-2	0.28986	0.131009	0.393997
ifc-1	0.599425	0.43911	0.656824
ifc-2	0.186737	0.220375	0.568207
ifd-1	0.354567	-0.0535906	0.246926
ifd-2	0.0268158	-0.148861	-0.178035
ife-1	0.105942	0.18004	-0.269228
ife-2	-0.177509	0.0911348	0.156222
iff-2	-0.0268911	0.243901	-0.181362
iffb-1	-0.231934	-0.368581	-0.422727
ifg-1	-0.19563	-0.119418	-0.154449
ifp-1	0.0150986	-0.28587	0.12363
iftb-1	0.198196	0.08106	-0.175827
ile-1	-0.158325	-0.124539	-0.229764
ile-2	0.0380363	-0.270266	-0.217387
ilys-5	-0.181593	-1.38788	-0.768159
ima-2	-0.446176	0.214434	0.343151
ima-3	0.567727	0.147024	0.399271
imb-1	0.0235507	0.0369924	0.108716
imb-3	-0.14139	-0.103902	-0.266021
immt-1	0.23823	0.0458955	0.0636839
imp-2	-0.532886	-0.533302	-0.259849
inf-1	-0.0237691	0.0179551	0.00280997
inx-12	0.191486	0.161038	-0.051662
inx-13	0.232336	0.307573	0.245207
inx-16	0.392364	0.035452	0.393475
inx-5	-0.205064	0.0282293	0.27855
isp-1	-0.123022	0.0562181	0.055043
isw-1	-0.168952	0.428205	0.712739
itx-1	0.206495	0.26511	0.16812
ivd-1	0.151952	0.618856	0.662136
JC8.2	-0.124758	0.0108877	-0.16813
jmjc-1	-0.773619	-0.19784	0.0171466
K01A2.5	0.450191	0.335719	0.436226
K01G5.5	-0.35292	-0.694617	-0.502928
K02B12.7	0.12363	0.140764	0.088465
K02D7.1	0.572844	0.443428	1.00737
K02F3.2	0.0875566	0.0229428	-0.107096
K03E5.2	0.179714	-0.0576778	0.380991
K04C2.2	-0.264089	-0.24779	-0.330507
K05C4.2	-0.195645	0.0139909	0.142826
K05C4.5	-0.242298	-0.188728	-0.139568
K06B9.2	0.0197284	0.292811	-0.0158579
K06G5.1	0.138773	0.116783	0.415373
K07C5.4	-0.0816631	-0.0162606	0.0250267
K07E3.4	-0.0629082	-0.118979	0.0136643
K07H8.10	-0.125855	-0.333646	-0.440376
K07H8.3	-0.255508	-0.067122	-0.156006
K08D12.3	-0.1947	-0.475711	-0.41298
K08E3.4	0.354737	0.1873	0.334254
K08E3.5	0.256429	0.318105	0.502113
K08F4.2	0.0755324	0.717078	0.820526
K09E2.3	-0.637188	-0.724504	-0.99101
K09H11.1	0.361956	0.58942	0.479972
K10C2.1	0.236055	-0.00945288	0.0779239
K10D3.4	-0.047142	-0.200568	-0.0869903
K10H10.2	0.475537	-0.642409	-0.824483
K11B4.1	-0.192503	0.0738242	0.284723
K11H12.1	0.311096	0.428619	0.653915
K11H3.3	-0.0653808	-0.125007	-0.116164
K12C11.1	0.261532	0.0570422	0.40902
K12H4.3	-0.229735	-0.363246	-0.355517
K12H4.4	-0.484486	-0.503042	0.0257008
K12H4.5	0.379742	0.0620926	0.0233722
K12H4.7	0.341605	0.137816	0.24299
kars-1	-0.216589	-0.242373	-0.31148
kat-1	0.103557	-0.00873934	-0.126643
kcc-1	0.323415	-0.325582	0.0229749
ketn-1	0.427151	0.215398	0.469153
kin-1	0.316687	0.667263	0.740795
kin-10	-0.010464	0.103066	0.120112
kin-19	0.0892793	0.0580949	0.164326
kin-2	0.185488	0.211212	0.368461
kin-3	0.0490834	-0.126719	-0.184709
klc-2	-0.0248485	-0.261989	0.0194924
laf-1	0.00208817	0.00537155	0.184569
lam-1	0.261606	0.283584	0.474086
lam-2	0.364769	0.264598	0.553724
lap-1	-0.435945	0.481029	0.47704
larp-1	-0.124181	-0.173264	0.125083
lars-1	0.260867	0.114627	-0.0655278
lbp-2	-0.174716	-0.361101	-0.421713
lbp-3	-0.127195	-0.338305	-0.247873
lbp-4	-0.141056	-0.219835	0.202222
lbp-5	0.115869	-0.0898011	-0.0168058
lbp-6	-0.0894456	-0.471764	-0.558275
lbp-7	-0.160443	-0.209798	0.0329998
lbp-9	0.164399	0.330293	0.427516
ldh-1	0.472493	0.810854	0.682801
lec-1	0.376401	0.415541	0.507079
lec-10	-0.122619	0.328777	0.262259
lec-3	0.254393	-0.0223242	-0.106234
lec-4	0.245433	0.0728855	0.137069
lec-5	0.586342	0.0316817	0.314695
lec-6	0.103843	0.0618794	0.180995
lec-8	0.304288	0.341453	0.694978
lec-9	0.446144	0.685132	0.374767
lem-2	0.00781873	0.0642586	0.0427921
let-2	0.16757	-0.247322	-0.0012937
let-418	0.346169	0.517863	0.782075
let-60	0.0106208	0.0623037	0.189297
let-711	0.139692	0.116561	-0.0135346
let-716	-0.506971	-0.284017	-0.313927
let-721	-0.106694	-0.18717	0.0636704
let-75	0.284165	0.122627	0.164078
let-754	-0.297638	-0.0189399	0.0647134
let-767	0.12087	0.0813691	0.168386
let-805	0.141309	0.328497	0.398188
let-92	0.413429	0.35552	0.323877
letm-1	-0.0514604	0.212958	0.200552
lfi-1	0.585459	0.246647	0.497917
lin-40	0.108544	0.595147	0.853194
lin-53	0.264756	0.312403	0.462991
LLC1.2	0.154176	-0.221644	0.0270846
LLC1.3	0.221038	0.190452	0.18176
lmn-1	0.457808	0.527928	0.762497
lmp-1	0.177632	-0.302655	0.114062
lntl-1	0.334968	-0.0969314	0.466389
lpd-5	-0.207507	-0.262748	-0.592183
lpd-7	-0.342411	-0.45168	-0.701229
lpd-9	-0.0053621	0.281794	0.261453
lpr-3	0.253059	-0.0129513	0.199069
lpr-4	0.440991	0.106962	-0.250213
lpr-5	-0.0993209	-0.318647	-0.0386667
lrp-1	-0.312279	0.122021	0.0930193
lsm-3	0.378062	0.461767	0.668749
lsm-8	0.146258	0.572566	0.613943
lst-3	0.629108	0.856518	1.20145
lys-1	0.700179	0.958113	1.3223
lys-2	0.447565	0.746767	0.361512
lys-4	-0.117938	-1.47239	-1.70201
M02D8.1	0.0719412	-0.207297	0.111713
M02H5.8	0.173229	1.16718	0.595964
M05D6.6	-0.220353	-1.00173	-0.581458
M106.4	0.435582	0.642994	0.635496
M142.5	0.299527	0.516751	0.167874
M153.1	-0.0340145	-0.40494	-0.236036
M176.2	0.126507	0.0973789	0.170157
M28.5	0.193646	0.229224	0.162771
M57.2	-0.0732789	0.0197869	0.496313
M60.2	-0.183966	0.0645921	0.15618
M88.5	-0.178709	0.146149	-0.0121014
mac-1	0.131049	-0.209177	-0.0210581
mag-1	0.244012	0.347116	0.67883
mak-2	-0.365588	-0.579038	0.181489
maoc-1	-0.367828	-0.328542	-0.196341
map-1	-0.130127	-0.291275	-0.471652
map-2	-0.371907	-0.0879339	0.0824086
mars-1	-0.0287647	-0.175682	0.0437394
math-33	0.308931	0.352764	0.273554
mbf-1	-0.41089	-0.160057	-0.00302104
mboa-6	-0.318783	-0.383973	-0.109474
mca-2	-0.140726	-0.212559	-0.607079
mce-1	-0.0465989	-0.0710924	-0.0664302
mcm-2	-0.195625	0.12682	0.442838
mcm-3	0.0805784	-0.0898778	0.550042
mcm-7	0.411324	-0.147039	0.248091
mdh-1	0.104945	0.102275	-0.0556139
mdh-2	0.104089	0.0526993	0.0288507
mdt-28	0.105485	-0.567559	-0.947576
mec-5	0.123979	-0.221342	0.508135
mec-7	0.51505	0.302566	0.521785
mecr-1	-0.217241	-0.0571268	-0.1117
mel-32	-0.490235	-0.467018	-0.635391
men-1	-0.0774955	-0.329613	0.0139843
mep-1	0.402714	0.656028	0.376402
mig-6	0.283445	0.233916	0.449322
misc-1	-0.0467023	-0.173882	-0.576857
mlc-1	-0.164212	-0.0552585	-0.199794
mlc-2	0.443687	-0.00073386	0.0331157
mlc-3	0.222363	-0.0146529	-0.0560738
mlc-4	-0.470671	0.13952	0.206389
mlp-1	0.033467	-0.541531	-0.438856
mlt-11	0.019839	-0.120483	-0.183344
mmaa-1	-0.35408	-1.16729	-1.16845
mmcm-1	-0.0313637	-0.0840831	-0.0224925
mog-2	0.436438	0.726416	0.784364
moma-1	-0.377135	-0.266904	-0.565009
mop-25.2	0.0905775	0.321911	0.349016
mpk-1	1.15304	1.03547	0.758137
mppa-1	0.112672	0.0540596	-0.260616
mppb-1	-0.283977	0.112416	0.00491492
mrg-1	0.346793	0.612851	0.613641
mrp-5	-0.035882	-0.0852774	-0.122134
mrpl-41	0.310493	-0.187733	-0.0376752
msi-1	0.0208129	-0.00798515	0.0495697
mspn-1	-0.105312	-0.120112	-0.634212
msra-1	-0.531365	-0.768076	-1.41207
MTCE.31	-0.0941303	-0.118383	-0.140006
mtr-4	-0.0570695	0.22749	0.215539
mtss-1	0.058301	-0.0189863	-0.118367
mua-6	0.0475967	-0.0552169	-0.103209
mup-2	0.1069	-0.00558522	-0.135273
mup-4	-0.491	-0.527116	0.170978
myo-2	0.24697	0.0363755	0.102762
myo-3	0.309364	0.117016	0.0893522
myo-5	0.398346	0.363367	0.227333
nars-1	-0.174718	-0.144156	-0.216713
nas-37	-0.0425245	-0.0481799	-0.0850973
ncam-1	0.0150742	-0.196223	-0.303944
ncbp-1	0.411576	0.263988	0.277623
ncbp-2	-0.25939	-0.261403	-0.130085
nck-1	-0.0377674	-0.344983	0.0777546
ncs-2	0.277493	0.106169	0.403167
nduf-5	-0.119816	0.142538	-0.0348068
nduf-6	0.318549	0.120399	0.261542
nduf-7	0.209192	-0.0564552	0.0645522
ndx-4	0.348149	0.06369	0.378219
ned-8	0.024951	0.128573	-0.646793
nex-1	0.227118	0.307026	0.550301
nex-2	0.247235	0.446369	0.559318
ngp-1	-0.167638	-0.312488	-0.641199
nid-1	0.0711571	0.115566	0.372284
nkat-3	-0.250077	-0.0874861	-0.0905605
nkb-1	0.283765	0.315694	0.643762
nkb-3	-0.108982	-0.0766093	0.112236
nlp-24	-0.0802308	0.407939	0.30056
nlp-40	0.0543788	-0.0685251	0.263575
nlt-1	0.137947	0.0471102	0.377829
nmt-1	0.322252	0.345902	0.154577
nmy-1	0.211459	0.0497621	0.286228
nmy-2	-0.0523097	-0.334094	-0.211775
noah-1	-0.091864	-0.473337	-0.446077
noah-2	-0.0178433	-0.151815	0.0375509
nol-1	-0.146177	-0.208295	-0.450641
nol-5	-0.0482708	0.0362534	0.00574528
npa-1	-0.00627394	-0.264101	-0.0312873
npl-4.1	-0.131325	0.152354	0.115888
npl-4.2	-0.131325	0.152354	0.115888
npp-1	0.0776713	0.162604	0.755867
npp-10	0.292325	0.237172	0.576986
npp-12	-0.0409163	0.0172349	0.256451
npp-13	0.450697	0.430329	0.739129
npp-17	0.198447	0.188621	0.550083
npp-19	0.106261	0.863852	1.59458
npp-20	0.0520933	0.368591	0.284488
npp-21	0.168179	0.24522	0.390574
npp-3	-0.233554	-0.00366845	0.386963
npp-8	0.279822	0.528631	0.551462
npp-9	0.323008	0.219149	0.0269149
nra-2	0.272549	0.176681	0.14103
nra-4	-0.0646632	0.00473049	-0.034507
nsf-1	0.0151383	0.204776	0.29724
nst-1	-0.322007	-0.433742	-0.310999
nuc-1	0.334347	0.2792	1.13751
nucb-1	-0.598551	-0.310344	-0.465924
nud-1	0.0122121	0.0558568	0.27236
nuo-1	0.147571	-0.109223	0.051248
nuo-2	0.124091	-0.120835	0.00288725
nuo-4	0.0544911	0.0916785	0.0468928
nuo-5	0.122936	-0.115073	-0.182364
nuo-6	0.368719	0.113248	0.387
nxf-1	-0.29118	0.166303	-0.210507
osm-11	0.607818	0.70358	1.09596
ost-1	0.678099	0.433555	0.31803
ostb-1	0.0323512	0.0763158	0.0761741
ostd-1	-0.347082	-0.213638	-0.322161
paa-1	0.258042	0.330945	0.353017
pab-1	-0.159384	-0.176236	-0.0733854
pab-2	-0.239234	-0.0954131	0.159402
pah-1	0.00804774	-0.010496	0.123561
pam-1	0.251318	0.423633	0.415702
par-1	0.683285	0.2729	0.532938
par-5	0.0134649	0.166063	0.122873
pars-1	0.00841326	0.0468394	0.10308
pas-1	-0.0184792	0.111386	-0.0513648
pas-2	-0.0841544	0.31088	-0.0189613
pas-3	-0.239062	0.0198738	-0.106325
pas-4	0.0941464	0.135775	-0.180898
pas-5	-0.104264	-0.0943443	0.0311196
pas-6	0.147497	0.321426	0.320456
pas-7	-0.203659	-0.112853	-0.0293733
pat-12	0.403492	0.0713176	0.187785
pat-2	0.488604	0.24669	0.270949
pat-3	0.268518	0.28402	0.673059
pat-4	-0.261596	-0.415857	-0.401201
pat-6	-0.0183342	-0.0747034	-0.202929
pbrm-1	0.533697	0.444027	0.192109
pbs-1	-0.379589	0.0737549	0.0567276
pbs-2	-0.0408418	-0.102591	-0.0627852
pbs-3	-0.0791984	0.0903987	0.00359778
pbs-4	0.00728635	0.0688457	0.0280096
pbs-5	-0.100706	0.15521	0.0355518
pbs-6	0.0481709	0.0366178	0.0473847
pbs-7	-0.171919	-0.0656343	0.0793823
pcca-1	0.231474	-0.0906501	-0.02466
pccb-1	0.241271	-0.0557584	-0.0900556
pcn-1	0.186777	1.07784	1.03155
pcp-3	0.0798439	0.168771	0.268956
pdi-1	0.0919325	0.390923	0.324144
pdi-2	-0.0643	-0.0260592	-0.0450946
pdi-3	-0.180396	-0.351583	-0.308965
pes-9	0.0893438	-0.0501435	-0.00324038
pfd-2	-0.122234	-0.381381	-0.542577
pfd-3	-0.0931807	-0.400652	-0.193362
pfd-5	-0.029362	-0.397212	-0.162267
pfd-6	-0.211491	-0.0434393	-0.0310239
pfn-1	-0.00147357	0.0882924	0.112705
pfn-2	-0.100224	-0.0383886	0.454937
pfn-3	0.293953	0.272738	0.682968
pgam-5	0.642383	0.512584	0.499187
pgk-1	0.147767	0.159877	0.126993
pgl-1	0.0172147	0.168204	0.00589989
pgp-2	-0.347457	0.0708149	0.25191
pgp-8	0.350017	0.40981	0.440801
pgp-9	-0.106355	0.984005	1.14883
phat-3	0.0304964	-0.223117	-0.494966
phb-1	-0.00473353	-0.0327658	-0.0736272
phb-2	-0.0723678	0.135122	0.0175601
pho-1	-2.01686	-2.40599	-0.745372
phy-2	-0.523288	-0.682374	-0.673067
plp-1	0.0273914	0.174561	0.239532
plst-1	0.750511	0.286362	0.872601
pme-5	0.780061	0.291782	0.638022
pmp-1	-0.0376909	-0.169052	-0.128855
pmp-5	-0.398165	-0.642516	-1.03596
pmt-1	-0.371943	-0.399467	-0.471871
pmt-2	-0.283081	-0.299308	-0.804327
pod-2	-0.071309	-0.390804	-0.708675
pph-4.1	1.03091	0.79359	1.0113
pph-5	-0.943311	0.0226161	-0.357223
ppk-2	0.290188	0.444371	1.38834
pptr-1	0.269591	0.164371	0.5126
ppw-2	-0.537399	0.20752	0.307003
pqn-22	0.368236	0.069831	-0.339675
pqn-27	0.331347	0.21842	0.207651
pqn-52	0.132426	0.0815458	0.540013
pqn-53	0.10027	0.420356	0.797585
pqn-59	0.524057	0.240221	0.831473
pqn-87	-0.068335	0.247116	-0.09346
prdx-2	0.14031	0.0799451	0.238772
prdx-3	0.227105	0.117989	0.246794
prdx-6	0.458875	0.327404	0.298273
prmt-1	0.178947	0.227919	0.247997
prmt-3	0.313744	0.45326	0.606556
prp-21	-0.112172	0.0355042	-0.0697197
prp-8	-0.00397445	-0.0390243	-0.246267
prx-19	-0.0994014	0.0276281	0.12129
psa-1	0.542422	0.670241	1.02931
ptp-2	-0.234582	0.343782	0.208293
puf-12	0.0469036	-0.106873	-0.155462
puf-9	-0.202784	-0.0695617	0.412454
pyc-1	-0.0317181	-0.362574	-0.343843
pyk-1	0.174032	0.357004	0.083242
pyk-2	-0.233778	0.0979019	-0.0318057
pyp-1	0.316854	-0.080992	0.136589
pyr-1	-0.375157	-0.837761	-0.982291
qars-1	-0.113727	0.0415318	-0.174462
qdpr-1	0.529847	0.555856	0.610685
R02D3.1	-0.185618	0.244836	0.340324
R02F2.9	-0.0563994	-0.260026	-0.574544
R03D7.1	-0.857001	-0.390535	-0.389228
R03E1.2	0.24377	0.0117742	0.0631193
R04F11.2	0.364531	0.0853683	0.221096
R05D3.9	0.44302	0.345517	0.591715
R05F9.6	0.0387869	-0.187199	-0.060694
R05G6.7	0.165787	0.232983	0.347742
R05H10.2	-0.28266	-0.478936	-0.465381
R05H10.5	0.224717	0.192508	0.396099
R05H5.3	-0.0133492	0.0117325	0.343736
R06C7.5	-0.157928	-0.221724	-0.262526
R07H5.8	-0.412023	-0.271499	-0.566992
R08E5.2	0.597146	0.551075	0.890271
R08E5.3	0.0393832	-0.923805	-1.99409
R09B3.3	0.0513065	0.234907	0.38106
R09H10.5	0.432167	0.144328	0.445844
R102.2	-0.145912	0.103427	-0.446714
R10H10.3	-0.401642	-0.55854	-0.127077
R119.3	0.621095	0.7613	0.536466
R11A5.4	-0.183304	-0.255442	-0.407711
R11A8.5	-0.101191	0.742323	0.763382
R11D1.9	-0.260622	-0.052634	-0.25076
R12C12.1	-0.209073	-0.779369	-1.01382
R12E2.11	-0.443277	-0.412989	-0.827415
R12E2.12	-0.0332792	0.589305	0.490384
R12E2.13	0.123848	0.111585	0.344881
R13H4.2	0.307599	0.279008	0.316821
R148.3	0.295753	-0.0840533	-0.173121
R151.2	-0.0453813	-0.125516	-0.475487
R151.7	-0.313064	-0.385612	-0.225507
R186.3	-0.412573	-0.033249	-0.154665
R193.2	0.260091	0.35514	-0.189372
R53.1	-0.242967	0.254494	0.325172
R53.2	-0.15506	-0.491385	0.103953
R53.4	0.0762363	0.109255	0.107316
rab-1	0.136055	-0.0729478	0.2915
rab-11.1	-0.0468492	0.119893	0.244714
rab-18	0.205645	0.279031	0.532127
rab-5	-0.0541445	-0.138629	0.169295
rab-6.2	0.00936389	0.101867	0.208025
rab-7	0.129845	-0.182014	-0.0445876
rab-8	0.0794423	0.0596517	-0.226189
rack-1	-0.0844302	-0.117264	-0.162778
rad-23	-0.195009	-0.219445	-0.126135
ral-1	-0.116903	0.218366	0.00888162
ran-1	0.297483	0.295728	0.368497
ran-2	-0.0372267	0.117113	0.222789
ran-3	-0.0824182	-0.432993	0.0881705
ran-4	-0.237584	0.160559	0.339123
rars-1	-0.0054845	-0.105786	0.144877
rbd-1	-0.325301	-0.116892	-0.282898
ret-1	0.333285	0.262653	0.411973
rfl-1	-0.037654	0.0508246	0.0734649
rhi-1	-0.26588	-0.423347	0.273325
rho-1	0.0560854	0.247698	0.3733
rig-3	-0.0598523	0.247046	0.711378
ril-1	-0.027846	-0.202061	-0.122664
riok-2	-0.312436	-0.374827	-0.184575
rla-0	-0.0542835	-0.0847205	-0.144385
rla-1	-0.141532	-0.0421245	-0.148526
rla-2	-0.0885743	-0.388302	-0.261104
rmd-2	0.336606	0.198904	0.150654
rme-1	0.0747019	-0.00988635	0.246621
rnh-1.0	1.08589	0.632185	0.663486
rnp-3	0.198866	0.358075	0.509785
rnp-4	0.233825	0.305655	0.949125
rnr-2	0.333952	0.338681	0.296736
rop-1	0.0195494	-0.232356	0.241038
rpa-1	0.178157	0.687374	0.771097
rpa-2	0.407237	0.090516	0.360899
rpb-2	0.270091	0.220551	0.193623
rpb-5	-0.17898	0.124518	0.253932
rpia-1	0.155416	0.110327	-0.739536
rpl-1	-0.214606	-0.0558933	-0.190589
rpl-10	-0.204738	-0.0396679	-0.12985
rpl-11.1	-0.199065	-0.230801	-0.198509
rpl-11.2	-0.199065	-0.230801	-0.198509
rpl-12	-0.273761	-0.0617869	-0.195447
rpl-13	-0.422777	-0.0876213	-0.192719
rpl-14	-0.329559	-0.105442	-0.301082
rpl-15	-0.0771299	-0.127934	-0.18591
rpl-16	-0.309392	0.0019997	-0.145603
rpl-17	-0.392505	0.00830715	-0.100322
rpl-18	-0.188202	-0.0590949	-0.14942
rpl-19	-0.124829	-0.0858161	-0.134017
rpl-2	-0.16068	-0.0575229	-0.116072
rpl-20	-0.336116	-0.0821615	-0.244428
rpl-21	-0.818433	0.186273	0.0282016
rpl-22	-0.299191	-0.225916	-0.332305
rpl-23	-0.506507	0.0113187	-0.226677
rpl-24.1	-0.39614	0.230062	-0.0232492
rpl-25.1	-0.0953041	-0.079429	-0.161216
rpl-25.2	0.0994748	0.0164181	-0.0500462
rpl-26	-0.895894	0.260334	-0.0520192
rpl-27	-0.481614	-0.0463381	-0.18303
rpl-28	-0.374908	-0.0604799	-0.125582
rpl-3	-0.126097	-0.106688	-0.261994
rpl-30	-0.182643	0.101276	-0.102275
rpl-31	-0.326438	-0.145247	-0.253612
rpl-32	-0.19693	-0.103089	-0.154247
rpl-33	-0.188229	0.157886	-0.0453826
rpl-34	-0.835166	0.143785	-0.162062
rpl-35	-0.442476	0.112278	-0.0940203
rpl-36	-0.339954	-0.199525	-0.235471
rpl-37	-0.294745	-0.269893	-0.284162
rpl-38	-0.228399	0.343389	0.268008
rpl-4	-0.160839	-0.122343	-0.21569
rpl-41	-0.213047	-0.108194	-0.0146859
rpl-43	-0.413194	-0.00294537	-0.26627
rpl-5	-0.0920013	0.0986042	0.00170246
rpl-6	-0.150553	-0.0970885	-0.242217
rpl-7	-0.279895	-0.0817376	-0.199584
rpl-7A	-0.42577	-0.0230723	-0.171715
rpl-9	-0.0911998	-0.0957895	-0.311693
rpn-1	-0.0271492	0.245464	0.206991
rpn-10	-0.256292	-0.118496	-0.0492365
rpn-11	-0.103924	-0.0188256	0.00279586
rpn-12	0.111028	0.255468	0.239513
rpn-2	0.0130597	0.293226	0.143681
rpn-3	-0.0371542	0.0889118	0.048745
rpn-5	0.631429	0.470769	0.208173
rpn-6.1	-0.170626	-0.113255	0.0122721
rpn-7	-0.142831	-0.0732175	-0.0419953
rpn-8	0.169235	0.0135868	0.276633
rpn-9	0.0540316	0.0295365	0.317096
rps-0	-0.134814	-0.0869191	-0.1309
rps-1	-0.160247	-0.191367	-0.254913
rps-10	-0.0767666	-0.0495268	-0.041539
rps-11	-0.801834	0.0767803	-0.250314
rps-12	-0.0046805	-0.151438	-0.129673
rps-13	-0.318167	-0.184875	-0.0569979
rps-14	-0.455265	-0.0895355	-0.224417
rps-15	-0.116547	-0.0635596	-0.109351
rps-16	-0.52632	0.0855465	-0.120607
rps-17	-0.29821	-0.16757	-0.0986379
rps-18	-0.290948	-0.0722512	-0.103318
rps-19	-0.601758	0.0567455	-0.158533
rps-2	-0.481505	-0.106976	-0.227446
rps-20	-0.657474	0.0716085	-0.151128
rps-21	-0.181103	-0.214943	-0.218917
rps-22	-0.0721109	-0.104386	0.0542023
rps-23	-0.775755	0.162173	-0.133434
rps-24	-0.139511	-0.0475237	-0.182352
rps-25	-0.185292	-0.132013	-0.250477
rps-26	-0.360105	-0.0765282	-0.118371
rps-27	-0.255571	-0.0939055	-0.254163
rps-28	-0.626018	-0.103694	-0.249851
rps-29	-0.639021	0.10643	-0.163604
rps-3	-0.00740813	-0.0627954	-0.151008
rps-30	-0.316337	-0.253396	-0.354142
rps-4	-0.563318	0.0529773	-0.195762
rps-5	-0.191814	-0.156073	-0.145398
rps-6	-0.253216	-0.119685	-0.139265
rps-7	-0.284223	-0.17384	-0.124377
rps-8	-0.3599	-0.119049	-0.307502
rps-9	-0.218097	-0.188326	-0.176272
rpt-1	-0.043658	0.262676	0.308166
rpt-2	-0.272204	0.12903	0.0734842
rpt-3	-0.036641	0.278684	0.0834218
rpt-4	0.156155	0.180336	0.211279
rpt-5	-0.0532338	0.17545	0.113409
rpt-6	0.0618455	0.0940671	0.22013
rrbs-1	0.00846226	0.0228205	-0.987395
rskn-2	0.292113	-0.0352639	0.433098
rsks-1	-0.117667	0.294238	0.321546
rsp-1	0.25019	0.414033	0.545051
rsp-2	0.268681	0.345097	0.574749
rsp-3	0.173351	0.00357443	0.390288
rsp-4	0.0897554	1.57656	0.121115
rsp-6	0.587266	0.581357	0.776901
rsp-8	1.52254	1.46377	2.09597
ruvb-1	0.213909	0.43203	0.704568
ruvb-2	0.0291317	0.236803	0.0868601
sams-1	-0.368556	-0.33155	-0.518187
sams-3	-0.0829821	0.0786739	-0.088433
sams-4	-0.0829821	0.0786739	-0.088433
sams-5	-0.0829821	0.0786739	-0.088433
sap-1	0.436438	0.726416	0.784364
saps-1	0.21133	0.105395	0.439456
sar-1	-0.284491	-0.366938	-0.47953
sars-1	-0.0773686	-0.105032	0.0593778
sax-7	0.265336	0.124615	0.334998
sca-1	0.499642	0.456733	0.306434
scpl-4	0.144999	-0.386811	-0.267781
sdha-1	0.150188	0.243757	0.0197456
sdha-2	0.751981	1.09809	0.746652
sdhb-1	0.151483	0.152663	0.142464
sdz-8	0.768851	0.255309	0.43457
sec-12	-0.375533	-0.516612	0.705958
sec-22	-0.186036	0.0182281	0.051939
sec-23	-0.446755	-0.529432	-0.609034
sec-24.1	0.00943815	0.029792	0.219566
sec-24.2	0.107434	-0.0952558	0.380739
sel-1	-0.365739	-0.505048	-0.569483
sel-2	0.275079	0.534437	0.739212
set-18	-0.559862	-0.524925	-0.611705
set-27	0.100215	0.364462	-0.0159787
set-30	0.0869182	-0.159956	0.185205
sft-4	-0.402589	-0.310838	-0.423832
sgt-1	-0.236517	-0.114847	-0.295475
sip-1	0.130726	0.302888	0.905325
skp-1	0.275935	0.581982	-0.383652
skr-1	0.5246	0.447503	0.571887
skr-3	0.119795	0.684594	0.38597
sma-1	-0.0481231	0.167285	0.417651
smc-3	0.0407958	-0.0978644	0.213936
smo-1	0.0781386	0.255855	0.103443
smu-1	0.485145	0.856052	0.468152
snap-1	0.0484602	0.148387	0.271613
snb-1	0.157142	0.165486	0.642773
snr-2	0.197911	0.359125	0.320625
snr-3	0.626684	0.0149489	0.123794
snr-4	0.203081	0.591845	0.562813
snx-3	0.309437	-0.31301	-0.129928
snx-6	0.114838	-0.0900495	-0.0342862
soc-2	-0.0976012	-0.128895	0.145223
sod-1	0.170534	-0.298707	0.0430843
sod-2	0.221752	0.169115	0.235217
sodh-1	0.824896	-1.0648	-1.90325
spc-1	0.309429	0.333805	0.521405
spd-5	0.286381	0.397316	0.530891
spg-7	0.548428	0.377652	0.267692
spl-1	-0.0242234	-0.200806	-0.0115023
spp-10	0.323956	-0.105436	-0.0902847
spp-14	-0.168122	-0.285758	0.0602533
spp-5	0.151796	0.0990106	0.348592
spr-2	0.675701	0.385103	0.419331
spt-5	-0.35224	0.076206	-0.0986269
sptl-1	-0.0244474	-0.153109	-0.0585045
sqd-1	-0.257718	-0.289682	-0.307062
sqt-3	-0.316478	0.172544	-0.215268
sqv-4	-0.261728	-0.547432	-0.454436
srp-7	0.169557	0.138489	0.400957
stam-1	0.214805	-0.148696	-0.100813
sti-1	-0.0773684	-0.017348	-0.0166987
stl-1	-0.34295	-0.346993	-0.350421
sur-5	-0.484388	-0.662586	-0.596423
sur-6	0.127773	-0.0610922	0.246302
sym-1	-0.668347	-1.05967	-1.06485
T01C8.5	0.0417198	0.24889	0.063992
T01D3.6	0.232386	0.422305	0.346326
T01E8.6	-0.0867678	-0.0241889	0.0606734
T02D1.8	-0.0517455	-0.373969	-0.407246
T02G5.7	-0.0887851	-0.615502	-0.747736
T02H6.1	-0.297089	0.0314316	0.123986
T02H6.11	0.191427	0.184113	0.0145891
T03F1.1	-0.0668594	0.181791	0.244149
T03F1.11	0.2406	0.0568668	0.0229202
T03F1.8	0.17592	0.0618032	-0.108111
T04A8.6	0.0180411	-0.0693116	-0.25151
T04A8.7	0.502644	-0.276073	0.0288153
T05E11.3	0.243868	0.208525	0.37237
T05H10.6	0.121131	-0.109907	-0.132867
T05H4.5	-0.0307239	0.0890589	0.231331
T05H4.6a	-0.0577729	-0.0710056	-0.0366927
T06D8.1	0.0403902	-0.38584	-0.224948
T07A9.9	-0.377093	-0.484182	-0.451565
T08A11.2	0.169309	0.241184	0.222798
T08B2.7	0.158026	0.240172	0.0904213
T08G11.1	0.0038965	-0.0586616	-0.0283409
T08H10.1	0.185046	-0.00265015	-0.245629
T09A5.9	0.0438348	0.19863	0.434172
T09B4.5	0.576789	0.432363	0.771125
T09B4.8	-0.0561814	-0.17531	-0.503822
T09B4.9	-0.620245	-0.517964	-0.257361
T10B5.3	0.456138	0.403326	0.263883
T10F2.4	0.388205	0.318562	0.42925
T11G6.8	-0.179757	0.303245	0.210538
T12A2.2	0.0493063	0.0524268	0.156361
T12D8.10	-0.309515	0.534514	-0.242433
T12D8.6	0.0279851	0.174418	0.302067
T12D8.9	0.404772	0.225063	0.64331
T13H5.4	0.816074	-0.124978	0.336503
T14D7.1	0.445579	0.556345	0.497698
T14G10.5	-0.112466	-0.00923325	-0.201101
T14G8.3	-0.109454	-0.298409	-0.455283
T16G12.1	-0.176908	-0.125953	-0.335471
T19B10.2	-0.349828	-0.518262	-0.55049
T19B4.3	-0.0807029	0.17162	-0.116174
T19C3.3	0.539991	0.175557	0.536481
T19D12.1	0.671266	0.732625	1.03143
T19D12.2	0.671266	0.732625	1.03143
T19D12.4	0.266124	0.371048	0.631025
T20B12.1	-1.05885	0.021678	-0.259609
T20B12.7	0.130343	-0.162715	0.0139581
T20H4.5	0.640747	0.044533	0.178684
T21C9.3	0.26697	0.25204	0.785106
T21H3.1	0.0728413	-0.285329	0.250829
T22B11.4	0.39958	0.0277216	0.163406
T22B11.5	0.0890104	-0.0434078	-0.0278561
T22D1.3	0.0203986	0.358416	0.513255
T22D1.4	0.118399	-0.0559025	0.112611
T22F3.3	0.168665	0.136322	0.0829456
T23E7.2	-0.388581	-0.223565	-0.475204
T23F11.1	0.100787	0.0162238	0.318628
T23G11.7	0.439733	-0.194615	0.856197
T24C12.3	0.26065	-0.0216733	0.186699
T24H7.2	-0.22239	-0.0983751	-0.323659
T25B6.2	0.191459	-0.542762	-0.139472
T25B9.1	0.269957	0.228495	1.03355
T25B9.9	0.136294	0.150416	0.347466
T25C12.3	-0.0805964	-0.47412	-0.0742283
T25F10.6	0.0933113	0.00278419	-0.190075
T25G3.3	-0.434216	-0.435832	-0.61913
T25G3.4	0.373166	0.379661	0.132817
T26C12.1	0.80799	0.803553	1.02261
T27A3.2	-0.575098	0.255573	-0.211814
T27E9.2	0.100619	-0.0627028	0.169298
T27F6.6	0.142376	-0.108777	0.295317
T28A11.2	0.0423115	-0.651215	0.66274
T28D6.6	-0.362822	-0.154141	-0.421813
tag-10	-0.318639	-0.445849	-0.660519
tag-151	-0.0193677	-0.283724	0.0190109
tag-163	0.118025	0.0806359	-0.0582621
tag-165	-0.56455	-0.851318	-1.36451
tag-170	0.258396	0.587822	0.514455
tag-173	-0.064618	0.106204	-0.0303518
tag-174	0.175729	0.167161	0.196402
tag-18	-0.262931	-0.169249	-0.235226
tag-210	-0.0677891	-0.105416	-0.102609
tag-231	-0.220492	0.0672132	0.118484
tag-242	-0.0467668	-0.117412	-0.0459473
tag-273	0.400905	0.266863	0.572213
tag-277	0.290101	0.223041	0.588708
tag-297	-0.382856	0.0386047	0.405251
tag-310	0.0693171	0.52354	0.710626
tag-320	-0.12142	-0.0661316	-0.136102
tag-335	-0.198392	-0.203666	-0.203713
tag-345	-0.239523	-0.0340404	-0.0912412
tag-60	0.268505	0.150827	0.270633
tag-72	0.652723	0.391231	0.55314
tag-93	-0.0386728	0.0744204	-0.164188
tars-1	-0.0710809	-0.216614	-0.0880677
tatn-1	0.431235	0.307773	0.0714775
tax-6	0.163934	0.421684	0.393449
tba-1	0.366431	0.271962	0.40017
tba-2	0.171629	0.263476	0.38427
tba-4	-0.0395873	0.303027	0.261348
tba-7	0.0825346	0.261333	0.423902
tbb-1	0.145361	0.171087	0.339734
tbb-2	0.254579	0.316951	0.488372
tcer-1	0.435415	0.0972581	0.662275
tct-1	-0.114617	-0.354855	-0.149147
teg-4	-0.0446154	0.193811	0.385698
tep-1	0.63189	0.519966	0.481298
tiar-1	-0.331166	-0.199215	-0.368432
tin-10	0.503034	0.507975	0.0530055
tin-13	0.235153	-0.0557823	0.0571329
tin-9.1	-0.588411	-0.31574	-0.303921
tkt-1	-0.0988906	-0.225679	-0.164403
tnc-2	0.263156	0.0353522	0.134053
tni-1	0.102532	0.246638	0.00524758
tni-4	0.497823	0.73439	0.472852
tnt-2	0.503343	0.239466	-0.159981
tnt-4	0.160586	-0.0489155	-0.165621
toe-1	0.0365954	-0.154856	0.345135
tomm-20	0.430561	-0.0190677	-0.125095
tomm-22	-0.0941643	-0.206504	0.485498
tomm-40	-0.220319	-0.204407	-0.280207
top-1	-0.0674873	-0.671649	-0.101133
top-2	0.503641	0.648862	1.00235
tpi-1	0.283731	0.335073	0.339264
trap-1	0.0452332	0.0777512	0.0864939
trap-3	-0.495455	-0.644256	-0.383391
trap-4	-0.263178	-0.240611	-0.255963
tsfm-1	-0.116406	-0.0935877	-0.301079
tsn-1	-0.219859	-0.322947	-0.285079
tth-1	0.134589	-0.168387	0.851684
ttn-1	0.166719	-0.0963294	0.0415408
ttr-15	-0.331177	-1.22281	-0.656429
ttr-16	0.0490367	-0.342963	-0.115205
ttr-2	0.0951329	0.135916	0.107901
ttr-31	0.254272	-0.0467646	0.16786
ttr-46	0.241857	0.0617054	0.29937
ttr-47	0.42974	0.517271	0.510634
ttr-48	0.0130805	0.280067	0.0979878
ttr-5	0.681522	-0.101808	0.723338
ttr-6	0.516039	0.121063	0.539786
ttx-7	0.236105	0.497244	0.482746
tufm-1	0.0577595	0.17899	0.113882
tufm-2	0.452369	0.0219923	0.345521
tyr-4	-0.0673587	0.384624	0.202446
uaf-1	0.418162	0.123873	0.448608
uaf-2	0.232676	0.0303625	-0.237198
uba-1	0.2257	0.309115	0.439511
uba-2	0.311509	0.700939	0.708319
ubc-13	0.785387	0.388126	0.75778
ubc-14	-0.193701	-0.134554	-0.298112
ubc-18	0.10807	-0.0962179	-0.211679
ubc-9	0.116714	0.293975	0.634478
ubh-4	0.115835	0.0376595	0.0870222
ubl-1	-0.193341	-0.388837	-0.359309
ubq-1	0.139416	0.303815	0.405817
ubq-2	0.139416	0.303815	0.405817
ubxn-1	0.150222	0.0833329	0.343332
ucr-1	0.170993	0.0396167	-0.0343333
ucr-2.1	0.236937	0.0837128	0.042056
ucr-2.2	0.0890135	0.000823143	0.0685321
ucr-2.3	0.0185787	0.184171	0.410827
uev-1	-0.102933	0.0786119	0.0423315
ufd-2	0.0315713	0.217405	0.24268
ufd-3	-0.0530608	0.410217	0.355809
ugt-22	0.102877	0.430868	0.454405
ugt-26	-0.626326	-0.284222	-0.918961
ugt-46	-0.0370448	-0.285896	-0.304287
ugt-58	-0.0593565	-0.228011	-0.281076
umps-1	-0.838155	-1.42048	-1.12782
unc-108	0.049011	0.0228033	0.134401
unc-112	-0.0696221	-0.118957	-0.137552
unc-115	0.68704	0.823118	0.322515
unc-116	-0.041458	0.0558272	0.423203
unc-15	0.192059	0.0227514	-0.200443
unc-18	0.171904	0.141868	0.189514
unc-22	0.286001	0.236963	0.250184
unc-25	0.538662	0.643548	0.485846
unc-27	-0.0488321	-0.305157	-0.433928
unc-32	0.50129	0.39778	0.426198
unc-35	0.380963	0.0721002	0.352016
unc-43	0.0839925	0.286235	0.2433
unc-44	0.736033	0.491669	0.490922
unc-45	-0.208973	-0.181619	-0.197244
unc-52	-0.0700153	-0.0776506	0.0402367
unc-54	0.121745	0.0360915	-0.139708
unc-60	0.188668	-0.134678	0.578071
unc-64	0.106115	0.286297	0.0648989
unc-70	0.304399	0.24388	0.465972
unc-78	0.271554	0.117496	0.0695274
unc-87	0.0278952	-0.159036	-0.213101
unc-89	0.312577	0.149971	0.159226
unc-95	0.260844	-0.690418	0.211478
unc-96	-0.0234343	0.199858	0.159791
unc-97	0.292686	-0.0440067	0.132685
upb-1	-0.218429	-0.477869	-0.687929
upp-1	0.032024	0.281572	0.922433
usp-14	0.195947	-0.0356824	0.0555814
vab-10	0.471384	0.273491	0.403458
vars-2	-0.320916	-0.485591	-0.469773
vbh-1	-0.308799	0.0209739	-0.322375
VF13D12L.1	-0.089259	0.0697285	-0.196715
VF13D12L.3	0.667431	0.376754	0.44667
vha-10	-0.542075	-0.172609	-0.131467
vha-11	-0.06363	-0.221033	-0.0873785
vha-12	-0.154096	-0.194622	-0.114581
vha-13	-0.0906043	-0.164631	-0.0469025
vha-14	-0.0205102	-0.121634	0.21946
vha-15	0.00183774	0.0941119	0.129868
vha-16	0.076246	0.0496473	0.236163
vha-19	-0.0442767	0.159181	0.271872
vha-2	-0.0118923	-0.0286023	0.236438
vha-5	-0.176426	-0.115166	0.25696
vha-6	-0.0515521	-0.323395	0.0080145
vha-8	-0.291224	-0.161514	-0.0715605
vha-9	-0.129948	-0.369698	-0.34357
vig-1	0.277149	0.248304	0.0196625
vit-1	1.70628	-0.142781	0.804366
vit-2	1.70628	-0.142781	0.804366
vit-6	1.69882	-0.691173	-0.165877
vpr-1	-0.282727	0.217593	-0.0629841
vps-25	0.947624	0.21097	1.32753
vps-28	0.0083354	-0.701208	0.164851
vps-35	0.227321	0.452727	0.592414
vps-4	0.0486125	0.309236	0.891487
W01A11.1	0.775527	0.347136	0.743256
W01D2.1	-0.294745	-0.269893	-0.284162
W02B12.15	-0.0175447	0.480148	0.489152
W02D3.1	0.0058218	0.0744739	0.264751
W02F12.5	0.259519	0.0331056	-0.0635888
W03F8.4	-0.057611	0.581936	0.565187
W03F9.1	-0.421862	-0.345245	-0.357027
W04C9.2	0.338049	0.111686	-0.103873
W04G3.5	0.137431	-0.0568455	-0.152893
W05G11.6	0.617523	0.121943	-0.202152
W06H3.3	-0.46787	-0.200082	-0.412924
W07E11.1	0.482778	0.297677	0.365416
W07E6.2	-0.138545	-0.133003	0.0731577
W07G4.4	0.0370493	0.142071	0.188288
W08E12.7	-0.192563	-0.144275	-0.221827
W09C5.8	0.0929498	0.0188216	0.25439
W09D10.3	0.0551767	1.03963	0.392973
W10C8.5	0.0664742	0.134209	-0.0995073
wah-1	-0.181182	0.0855203	0.266483
wars-1	-0.121204	-0.0110733	-0.085121
wdr-5	0.0346806	-0.255439	0.296785
wrt-10	0.192684	-0.97817	-0.974297
xpo-2	0.278794	0.350084	0.488893
xrn-1	-0.488833	-0.225531	-0.22114
Y102E9.2	0.00130664	-0.038512	0.199933
Y105E8A.19	-0.0583249	-0.0920515	-0.0245826
Y105E8B.5	-0.358963	-0.215975	-0.194188
Y110A7A.19	-0.136193	-0.316625	0.021331
Y110A7A.6	-0.41125	-0.949195	-0.606562
Y113G7B.16	-0.130352	0.138295	-0.0319163
Y116A8C.27	-0.371373	-0.412438	-0.621483
Y119D3B.16	-0.0193797	-0.996007	-0.575258
Y16B4A.2	0.588203	0.0345596	0.537738
Y18H1A.4	-0.228183	-0.0777339	-0.050682
Y22D7AL.10	0.123736	-0.0272311	-0.16062
Y24D9A.8	0.0886119	0.0235306	0.170129
Y25C1A.13	0.644087	0.810487	0.70449
Y25C1A.5	-0.0236279	-0.260597	-0.278929
Y32F6A.5	0.0185105	-0.118146	0.18928
Y32G9A.8	0.207196	0.287303	0.28819
Y34B4A.6	-0.187562	-0.481161	0.181264
Y34D9A.1	-0.327693	-0.207027	-0.249179
Y37D8A.18	0.393213	0.282891	0.219747
Y37D8A.2	0.195299	0.0400971	-0.180964
Y37E11B.5	-0.216503	0.367943	0.147523
Y37E3.10	-0.0245813	-0.306578	-0.134595
Y37E3.17	0.165295	0.10982	0.271492
Y37E3.8	-0.640187	0.0540684	-0.120423
Y38F1A.6	-0.208877	-0.567836	-0.90848
Y38F2AR.12	0.266759	0.324377	0.331751
Y38F2AR.9	-0.181743	-0.106204	-0.15287
Y39A1A.14	-0.00870805	-0.504553	0.019256
Y39B6A.1	0.615695	0.535115	1.27552
Y39B6A.33	0.215518	0.350226	-0.0324417
Y39E4A.3	-0.209169	-0.28915	-0.375778
Y39G10AR.8	-0.173555	-0.229407	-0.139738
Y39G8B.1	-0.0116514	0.306646	0.246499
Y40B10A.2	0.226558	0.698363	0.292437
Y41C4A.13	0.755124	0.588257	1.11542
Y41D4A.4	0.071597	0.132145	0.42614
Y41D4A.5	-0.254886	-0.187653	0.0504117
Y41D4B.16	-0.286954	-0.14881	0.310524
Y42H9AR.1	-0.200782	-0.586704	0.1154
Y43F4B.5	0.192463	0.288025	0.349885
Y43F8B.1	0.477049	0.347162	0.424306
Y43F8C.13	-0.019223	-0.100702	-0.118637
Y44A6D.2	0.0740083	-0.205813	0.0108819
Y44E3A.6	0.139846	0.247487	0.889877
Y45F10D.7	-0.137841	0.046092	0.194887
Y46E12BL.2	-0.106783	-0.169183	-0.0875418
Y46G5A.19	-0.182293	-0.0900607	0.16414
Y46G5A.4	-0.078482	0.103859	0.160015
Y47D3A.21	-0.584324	-0.154506	-0.476081
Y47G6A.18	-0.0658424	0.299933	-0.156515
Y47G6A.21	-0.136434	0.167524	0.152848
Y47G6A.22	0.04718	0.320319	0.227257
Y48A6B.3	-0.427304	-0.324319	-0.129665
Y48B6A.1	-0.772003	-0.465641	-0.886678
Y48C3A.3	-0.311645	-0.0553389	0.105706
Y48E1A.1	-0.208902	0.00553946	0.0084512
Y48E1B.5	-0.142152	0.349804	-0.104089
Y48G10A.1	0.14564	0.411753	0.215898
Y48G8AL.5	-0.120462	-0.0591234	-0.238596
Y49E10.18	0.0186338	-0.495564	-0.0942377
Y50D4C.2	0.0743498	0.00232415	-0.00561445
Y50D7A.4	-0.11538	-0.066744	0.405133
Y51H1A.3	-0.240828	0.0270107	0.0708556
Y53C12B.1	-0.402936	-0.471491	-0.00296087
Y53F4B.39	-0.00163104	-0.271569	-0.601934
Y53G8AL.2	-0.240148	-0.253137	-0.179846
Y53G8AR.9	0.196125	0.161852	0.476941
Y54E10A.3	0.503248	0.179209	0.58044
Y54E10A.6	-0.33531	-0.580386	0.266812
Y54E10A.7	0.0944843	0.190323	0.104411
Y54E10BR.5	0.0873917	-0.183421	0.0571933
Y54E5A.5	-0.291808	-0.26408	-0.198855
Y54F10AM.5	0.193778	0.0492057	0.199037
Y54F10AM.8	0.0127626	-0.407542	-0.0754699
Y54F10AR.1	0.0662146	0.333913	-0.00251969
Y54G11A.7	0.756985	0.880102	0.887683
Y54G2A.2	0.297958	0.399974	0.378414
Y54H5A.1	-0.282316	-0.0354502	0.126473
Y54H5A.2	-0.251789	0.161775	-0.235387
Y55F3AM.13	-0.334887	-0.0885994	-0.136878
Y55F3AR.2	-0.402671	0.643672	0.426093
Y56A3A.19	0.280499	0.280434	0.282692
Y56A3A.7	-0.0366718	0.2017	-0.00486138
Y57A10A.23	-0.0707952	0.192299	-0.000440268
Y57A10A.27	-0.109501	0.00897226	-0.0969731
Y57G11C.15	-0.394911	-0.510915	-0.433764
Y57G11C.3	-0.157279	-0.0126158	0.132593
Y57G11C.34	-0.667723	-0.170946	-0.292561
Y57G7A.10	-0.270422	-0.0587305	0.026603
Y59A8A.3	-0.080084	-0.0142708	0.203946
Y59A8B.10	0.117812	0.281499	0.517787
Y59A8B.6	0.25609	0.196205	0.328183
Y60A3A.9	-0.602678	-0.498067	-0.399122
Y62E10A.13	0.0564996	0.133855	-0.570944
Y65B4A.6	0.0535665	0.156003	0.336624
Y65B4BR.5	0.04681	-0.00777901	0.0629829
Y66D12A.9	-0.0736786	0.118148	0.289977
Y66H1A.4	-0.556026	-0.830125	-0.415461
Y67D2.3	-0.0693381	0.292171	0.092398
Y67H2A.5	0.158095	0.24505	0.361521
Y69A2AR.18	0.106545	-0.103959	-0.0422927
Y71F9AL.17	-0.217361	-0.0688773	-0.0684917
Y71F9AL.9	-0.0652005	0.0857553	-0.250343
Y71G10AL.1	0.318513	0.390878	0.625401
Y71G12B.10	0.17373	0.222435	-0.160658
Y71G12B.6	0.0833853	-0.0120006	-0.259762
Y71G12B.8	-0.18342	-0.600559	-0.652661
Y71H10A.1	0.282559	0.23516	0.268432
Y71H10B.1	-0.189385	-0.199766	0.0194379
Y71H2AM.11	-0.215111	-0.133633	0.0828789
Y71H2AM.4	0.345137	0.316596	0.765185
Y71H2AM.5	0.0937444	0.115239	0.194408
Y71H2AR.1	-0.127414	0.229433	0.377384
Y75B7AR.1	0.33635	-0.664361	-0.54367
Y75B8A.7	-0.369829	-0.54122	-0.6655
Y77E11A.1	0.876401	0.237985	-0.0337322
Y7A5A.1	0.0358305	-0.0515381	0.568882
Y82E9BR.14	-0.0456414	0.0881598	0.274186
Y92H12A.5	-0.0500912	0.211103	0.0840263
Y92H12BL.1	0.028628	0.459638	0.231362
Y94H6A.8	-0.248793	-0.180646	-0.167057
ykt-6	-0.147383	-0.289746	-0.255282
ZC247.1	0.289232	0.228664	0.527755
ZC373.1	0.0584798	0.0389785	0.205972
ZC395.10	-0.303041	-0.200272	0.114381
ZC410.5	0.979988	0.83875	0.7255
ZC434.8	0.0563367	0.394512	-0.359379
ZK1025.3	-0.621606	-1.25612	-0.231122
ZK1055.7	0.330333	0.700066	1.02426
ZK1073.1	0.538011	0.391593	0.593049
ZK1098.4	-0.441234	0.0614223	0.080777
ZK1098.7	0.148733	0.195231	0.160517
ZK1307.1	-0.242782	0.152376	0.0475602
ZK1307.8	0.0962995	0.173028	0.307052
ZK1320.9	-0.308332	-0.482168	-0.46696
ZK1321.4	0.386045	0.247143	-0.469493
ZK154.1	0.233594	-0.257594	0.570141
ZK185.3	-0.395502	0.207128	0.184081
ZK370.8	-0.391972	0.44038	-0.909056
ZK512.2	-0.2023	-0.0969682	-0.700187
ZK550.3	0.0310422	0.217929	-0.0179202
ZK550.6	0.093137	0.522416	0.369454
ZK6.11	-0.177066	-0.50044	-0.501831
ZK616.4	0.190314	0.447892	1.03317
ZK632.4	-0.295107	0.189113	-0.0640104
ZK637.2	-0.394719	-0.294179	-0.722942
ZK669.4	-0.0935469	0.00077606	-0.296849
ZK673.2	0.111071	0.178717	0.130215
ZK686.3	0.119572	0.055988	0.255486
ZK809.3	0.229676	0.155871	0.185901
ZK829.4	0.405908	0.331499	0.457221
ZK829.7	-0.137374	0.0325118	0.207899
ZK836.2	-0.0656516	-0.153014	-0.0748859
ZK909.3	0.182292	0.273581	0.235711
ztf-7	0.0504984	-0.0960143	-0.0887014
zyg-9	-0.223503	0.00785013	0.285022
zyx-1	0.187512	-0.0755615	0.0519982

## Sheet: Unfract. SILAC 587 Proteins
Protein	log2 fold change protein (mir-58.1 / WT)	log2 fold change protein (mir-80; mir-58.1 / WT)	log2 fold change protein (mir-80; mir-58.1; mir-81-82 / WT)
aagr-3	-0.436457	0.149878	0.0107794
aars-2	0.0594736	-0.0330398	-0.330543
acbp-1	0.147286	-0.647174	-0.449095
acbp-3	-0.0581806	0.0908776	0.286934
acdh-1	-0.257366	-0.528908	-0.885366
acdh-10	-0.0170619	-0.357418	-0.229589
acdh-3	0.0941466	0.0082212	0.310072
acdh-7	0.179122	0.108337	0.0577546
acdh-8	-0.0170619	-0.357418	-0.229589
aco-1	-0.123364	-0.114032	-0.151951
aco-2	-0.0428433	0.00224595	-0.14843
acs-4	0.628078	0.381177	0.830655
act-4	0.171212	0.0728721	0.0666568
act-5	0.154074	0.0305566	0.123562
ads-1	0.00455805	-0.0298315	0.114488
ahcy-1	-0.155599	-0.126874	-0.511763
aldo-1	0.639207	0.697585	0.867105
aldo-2	-0.0567521	-0.120164	-0.0958865
alh-1	0.543103	0.312471	0.209938
alh-13	-0.329023	-0.368022	-0.525216
alh-3	-0.140983	-0.0906562	0.172262
alh-8	-0.0653378	-0.0777208	-0.424294
alh-9	-0.200329	0.0520332	0.021431
anc-1	0.192128	0.260097	0.39164
ant-1.1	0.127557	0.0611882	0.0868898
ant-1.2	0.139081	0.0953629	0.0726164
aqp-2	0.803249	0.346698	0.355617
ard-1	-0.0138052	0.136366	0.0513602
arf-3	0.134219	0.126714	0.159822
asb-2	0.272291	-0.129293	0.117448
asg-2	-0.0526319	0.0344113	-0.038791
asp-1	0.141978	-0.390914	-0.391648
asp-2	-0.202653	-0.574062	-0.384356
asp-3	-0.0335555	-0.487941	-0.218548
asp-4	0.17462	-0.0510056	-0.149623
asp-5	0.026192	-0.536783	-0.251689
asp-6	0.295598	-0.379856	0.0601267
atad-3	-0.168513	0.0330924	-0.376202
atp-2	0.0967631	-0.0366634	-0.0504906
atp-3	-0.377677	-0.134389	-0.091239
atp-4	-0.0555947	-0.0690157	-0.11626
atp-5	0.156806	0.0601715	-0.0698904
B0286.3	-0.0980666	-0.453453	-0.352837
B0303.3	-0.0902638	-0.0648407	0.0186404
B0334.3	-0.0211427	0.218213	0.398607
B0365.1	0.237055	-0.831546	-0.371569
B0495.7	0.14028	-0.301738	-1.00225
B0546.1	0.102307	0.145788	0.238618
baf-1	0.168504	0.0131596	0.209769
C01B10.11	0.172037	-0.134043	-0.0750572
C04C3.3	0.15337	0.199608	0.119038
C05C10.3	-0.146893	-0.102985	-0.394885
C05G5.4	-0.268478	-0.227456	0.087903
C06A8.1	-0.0845563	-0.0303892	-0.0576803
C06A8.3	0.00415949	0.078644	0.219955
C06G3.5	0.174891	0.247465	0.492955
C07D8.6	0.215149	0.210618	0.188845
C08H9.2	-0.161265	-0.0726275	0.0054572
C10G11.7	0.623872	0.572071	1.2082
C13B9.3	-0.311638	0.0529009	-0.460426
C14B9.2	0.224018	0.236	0.664915
C14F11.1	0.135414	0.0250593	0.0449667
C14F11.6	-0.0892285	0.0531388	0.12008
C15H9.9	0.417565	0.32626	0.521326
C16A3.10	-0.184249	0.48919	0.85127
C23G10.2	0.5888	0.761903	1.57793
C25H3.9	-0.518579	-0.405961	-0.428524
C30C11.4	0.597365	0.503802	0.601968
C31C9.2	-0.259588	-0.799527	-1.09313
C32D5.8	0.0955821	0.47079	0.771021
C32F10.8	0.404176	-0.168225	-0.196336
C33A12.1	-0.373954	-0.529879	-0.308256
C35B1.5	-0.0195198	-3.48795	0.608997
C37A2.7	-0.0800388	-0.129118	-0.323069
C37E2.1	0.363539	0.561962	0.173563
C37H5.6	0.188814	0.20929	0.524461
C41G7.9	0.395359	0.217268	0.971783
C44B7.10	0.222479	-0.162332	-0.457092
C44E4.4	0.16147	0.343471	0.0579784
calu-1	0.447462	0.0954942	0.612141
cco-2	0.0781762	0.031875	0.290377
cct-1	0.720225	0.709441	0.614506
cct-2	0.0300957	0.217901	0.209751
cct-3	-0.0362551	0.040036	0.0688864
cct-4	0.0404464	0.0899596	0.056679
cct-5	0.0597049	-0.00205476	0.049957
cct-6	0.660489	0.53573	0.536061
cct-7	0.0182123	0.0209504	0.0759781
cct-8	0.204212	0.268774	0.305147
cdc-48.1	0.352456	0.836484	0.180848
cdc-48.2	0.040072	0.187465	0.251036
cey-4	0.217529	0.0742221	0.198985
cgh-1	0.090799	0.290626	0.378588
chc-1	0.0810513	0.359718	0.19886
clec-63	0.26474	0.328142	0.846988
clu-1	0.12346	0.0815007	-0.270652
cmd-1	-0.00358705	0.375764	0.161235
cpl-1	-0.29061	-0.54297	-0.590236
cpn-3	0.264794	0.146794	0.183488
cpr-1	1.00725	1.30101	1.79229
cpr-4	0.347896	0.232923	0.715352
cpr-5	-0.768221	-0.636582	-0.259841
cri-3	-0.0952655	-0.115022	-0.264255
crt-1	0.011967	-0.0718525	-0.105977
csq-1	0.1823	0.0748786	-0.200594
cts-1	0.15389	0.273124	0.303987
cyc-1	0.124771	0.0770846	0.101203
cyc-2.1	0.0453662	0.148538	-0.0154015
cyn-1	-0.234476	-0.258133	-0.163184
cyn-3	0.134896	0.543378	0.61421
cyn-5	0.177636	0.413676	0.612046
cyn-7	-0.128886	0.23066	0.233288
D1005.1	0.237055	-0.831546	-0.371569
D1022.4	0.493967	0.819892	0.743758
D2096.8	-0.0507286	-0.131389	-0.0316675
daf-21	0.138295	0.262621	0.437017
daf-22	0.00598947	-0.591296	-0.152726
dao-2	0.180213	0.0278481	-0.0474485
dars-1	0.141278	0.0412641	0.427558
dct-16	-0.326839	-0.745177	-0.761426
dct-18	-0.349423	-0.625011	-0.570304
deb-1	0.188131	-0.0241022	0.309057
dhs-28	-0.0637375	-0.0525826	-0.0615135
dhs-6	-0.163535	0.181211	0.0986036
dim-1	0.594758	0.0222916	0.0488006
dlc-1	0.129273	0.270978	0.419668
dod-19	-0.0638146	-0.0171456	0.491401
dpy-11	-0.11222	0.184403	0.193209
dpy-18	-0.338895	-0.134031	-0.203858
dpy-30	0.126244	0.276174	0.779605
drr-2	0.129041	0.305442	-0.0741847
dsc-4	-0.0600256	-0.330071	-0.111321
eat-6	0.2848	0.118736	0.303873
ech-6	-0.307013	-0.249814	-0.453044
eef-1A.1	-0.0268716	0.168116	0.178773
eef-1A.2	-0.0268716	0.168116	0.178773
eef-1B.1	-0.0522336	-0.0848614	-0.0444987
eef-1B.2	-0.0522336	-0.0848614	-0.0444987
eef-1G	-0.0310966	-0.0353215	-0.0785533
eef-2	-0.139421	-0.157877	-0.109872
egl-45	0.166177	0.237588	0.00427412
eif-6	0.11733	0.350917	0.315976
enol-1	0.287848	0.436364	0.336518
eps-8	0.0354537	0.1895	0.38888
erm-1	0.0332695	0.2552	0.118448
erm-1	0.0332695	0.2552	0.118448
F01F1.9	-0.420935	-0.312052	-0.0743736
F01G4.6	-0.0371591	0.0593858	0.21216
F09B12.3	-0.635937	-0.803196	-0.909276
F09E5.3	-0.325365	-0.262212	-0.272406
F09F7.4	-1.00138	-1.14275	-1.78766
F13E6.1	-0.02152	0.139218	0.0516737
F20G2.2	-0.0212824	0.239687	0.183868
F22F7.1	-0.811237	-1.28185	-1.57638
F23B12.5	0.229864	0.051276	-0.0771947
F23C8.5	-0.605775	1.62859	0.507482
F25H2.5	0.121292	0.108928	0.215578
F26E4.6	0.0213943	0.219052	0.0752371
F27D4.1	0.0106943	0.00401429	0.0186337
F29C4.2	0.178828	0.0068851	0.145463
F32B5.1	-0.1599	-0.157889	-0.38623
F32D1.2	-1.26462	0.250065	0.525648
F36A2.7	0.113943	0.109935	0.211381
F37C4.5	0.0332012	0.0328238	0.136164
F38B2.4	0.16774	-0.0882119	-0.0863216
F40F4.6	-0.0664294	-0.50223	-0.142867
F41C3.5	-0.112338	-0.397927	-0.694495
F42G8.10	-0.224375	-0.0820886	-0.10161
F43G9.1	0.0523986	-0.180396	-0.22568
F44E5.1	-0.182269	-0.0902728	0.114035
F44E5.4	-0.048883	0.0633208	0.204913
F45H10.2	-0.198114	-0.0875278	-0.399202
F46H5.3	0.262009	0.28601	0.0208824
F47B10.1	0.0575596	0.506085	0.148608
F49E2.5	0.556058	0.39146	0.6445
F53A2.7	0.256168	0.455182	0.0934315
F53F1.2	-0.504753	-0.538109	-0.699342
F53F4.10	0.235975	0.0826854	0.0533555
F54A3.5	0.532966	-0.912591	-0.138447
F54C8.7	-0.158405	-0.154658	-0.00775302
F54F11.2	0.0993454	-0.301797	-0.539755
F57B10.3	-0.195931	-0.256453	0.0635145
F57F4.4	0.0665004	-0.260617	-0.269139
F57F5.1	0.031377	0.209538	0.266198
F58E10.3	-1.1236	-0.920056	-0.937937
F58F12.1	0.217401	0.181197	0.304971
fah-1	0.32481	0.293503	0.545196
far-1	-0.0553083	-0.431357	-0.259028
far-2	-0.476904	0.190135	-0.112842
fars-3	-0.174133	-0.0954977	-0.267208
fasn-1	-0.0875167	-0.585294	-0.44346
fat-2	0.0290277	-0.550196	-0.666656
fbp-1	0.152491	0.25168	0.0683367
fib-1	0.0423267	0.16453	0.124766
fipr-21	-0.332238	0.2278	0.347222
fkb-2	0.501966	0.579387	0.809688
fkb-6	-0.511126	-0.208668	0.78274
fln-1	-0.120579	-0.215842	-0.101538
ftn-2	0.216028	1.12365	0.870985
ftt-2	0.283111	0.228448	0.465983
fum-1	0.666923	0.572018	0.648756
gars-1	0.141197	0.17412	0.056679
gdi-1	0.0527991	0.332004	0.156865
gei-7	0.0573862	-0.324919	-0.674978
gfi-1	0.0665004	-0.260617	-0.269139
gln-3	0.0602875	0.0567655	-0.206605
glrx-10	-0.156803	-0.014521	-0.10055
gpb-1	0.52482	0.51249	0.572341
gpd-2	0.296744	0.422341	0.376134
gpd-3	0.296744	0.422341	0.376134
grd-10	1.69817	1.36495	0.291251
gsp-1	0.226381	0.16314	0.274477
gsp-2	0.226381	0.16314	0.274477
gst-1	0.0146414	0.241876	0.433546
gst-10	-0.271536	-0.408091	0.0546995
gst-26	0.377348	0.311825	0.704681
gst-5	0.346644	0.057408	0.544296
gsy-1	0.0899085	-0.0614753	-0.0415009
gta-1	0.224803	0.358965	0.372919
H03A11.2	0.137968	0.22903	0.715325
H19N07.1	-0.115289	-0.223523	0.0727968
H24G06.1	0.0534785	-0.126706	-0.996858
H24K24.3	-0.0633912	-0.206929	-0.567275
H28O16.1	-0.00329595	-0.0938624	-0.0604079
haf-4	-0.128135	-0.58948	-0.0220415
hel-1	0.30584	0.184159	0.433454
his-1	0.3736	0.17227	0.511941
his-11	0.295503	0.475509	0.73681
his-2	0.516689	0.444797	0.753798
his-3	0.76649	1.07063	0.880513
his-35	0.76649	1.07063	0.880513
his-39	0.295503	0.475509	0.73681
his-4	0.295503	0.475509	0.73681
his-40	0.516689	0.444797	0.753798
his-41	0.295503	0.475509	0.73681
his-48	0.295503	0.475509	0.73681
his-57	0.76649	1.07063	0.880513
hmg-11	0.973985	1.21553	1.6655
hpd-1	-0.383534	-0.00681869	0.150616
hrp-1	-1.00575	-0.874003	-0.78043
hsp-1	0.0853223	0.176985	0.27113
hsp-12.2	0.338989	0.225033	0.369872
hsp-3	-0.179417	-0.207871	-0.114913
hsp-6	-0.0885674	0.0245766	0.0417654
hsp-60	0.110301	0.130388	-0.0781488
hsp-70	-0.048883	0.0633208	0.204913
iars-1	-0.309481	-0.37555	-0.373139
icd-1	0.193895	0.414213	0.309311
idh-1	0.227637	0.390232	0.26446
ifb-1	0.38643	0.305402	0.202033
ifb-2	0.126678	0.140906	0.375908
ifc-1	0.351437	-0.0716326	0.560803
ifc-2	0.267996	0.177485	0.592347
iff-2	-0.0186652	-0.179986	-0.215112
ifg-1	-0.537362	-0.0379749	0.196235
ifp-1	0.0107995	-0.367169	0.0397908
ilys-5	-0.165333	-0.848856	-0.260508
ima-3	0.281347	0.01551	0.176711
imb-3	-0.171021	-0.0842417	-0.233275
inf-1	0.0854161	0.0636492	0.251215
isp-1	0.099439	0.0621884	0.166818
ivd-1	0.160956	0.37677	0.494872
K01G5.5	0.189073	-0.0443554	-0.222372
K06G5.1	0.0951865	0.0316809	0.263739
K07C5.4	0.193505	0.180484	0.289765
K08F4.2	-0.267866	0.133339	0.213394
K10C2.1	0.181239	0.0709665	-0.0147448
kars-1	-0.110102	-0.131467	-0.0781065
kat-1	-0.34761	-0.220863	-0.312113
ketn-1	-0.557378	0.242559	0.15702
kin-2	0.20166	0.202441	0.328697
kin-3	-0.0949105	0.048102	0.0197882
laf-1	-0.0285197	0.0390186	0.138124
lam-1	-0.00272106	0.0708733	-0.340206
larp-1	0.307994	0.44752	0.315672
lbp-6	-0.195473	-0.467616	-0.716041
ldh-1	0.268037	0.899452	0.653431
lea-1	0.250294	0.0166885	0.566961
lec-1	0.399198	0.531932	0.571474
lec-10	0.216184	0.563007	0.640639
lec-2	0.502955	0.318857	0.141281
lec-4	-0.0911555	-0.0209186	-0.104842
lec-5	0.410132	0.262915	0.382493
lec-6	-0.0478352	0.206715	0.48811
lec-9	0.101248	-0.344796	-0.0130881
let-75	0.2222	0.184434	0.0979765
let-754	-0.273511	-0.198915	-0.370094
let-767	-0.346991	0.348597	0.508383
let-92	0.121618	0.267854	0.737871
lev-11	0.0921849	-0.23712	-0.258858
LLC1.3	0.081362	0.144676	-0.0298449
lmn-1	0.576144	0.451571	0.93201
lpr-3	-0.0436679	0.203153	0.244343
lys-1	0.638976	0.958872	1.37267
lys-4	-0.163104	-1.23838	-1.98032
M02D8.1	0.164267	-0.194159	-0.149534
M28.5	0.392298	0.701326	0.407664
mdh-1	-0.0440873	-0.0745472	-0.139363
mdh-2	0.0630261	0.142469	0.125529
mel-32	-0.396306	-0.261436	-0.248016
mig-6	0.321628	0.485751	0.351077
mlc-1	0.148561	0.00331894	-0.159593
mlc-2	-0.14455	-0.209541	-0.182679
mlc-3	0.152552	-0.0519059	-0.0796042
msra-1	-0.0362437	-0.822245	-1.74654
MTCE.31	0.0617418	0.0220581	0.0707074
mup-2	0.15121	-0.0612995	-0.119717
myo-2	0.0455536	0.0687953	-0.0391968
myo-3	0.15568	0.22429	0.042504
ncs-2	-0.221293	-0.174867	-0.184848
nex-1	0.230395	0.483811	0.72435
nkb-1	0.321966	0.159085	0.449837
nkb-3	0.0386903	-0.0427249	0.138274
nmt-1	0.0890421	0.207651	0.186761
nol-1	-0.0149173	-0.194662	-0.179699
nol-5	0.158983	0.0865758	0.084947
npa-1	-0.130911	-0.576382	-0.135824
nst-1	-0.328785	-0.196842	-0.99986
nuo-1	-0.00353972	0.0312907	-0.0932065
nuo-4	-0.0456654	-0.0968875	-0.154713
nuo-5	0.113278	0.0310753	0.0500851
paa-1	0.259939	0.249746	0.373555
pab-1	-0.140183	0.0706154	0.0734378
pam-1	0.202383	0.527561	0.200424
par-5	0.171853	0.478567	0.600331
pars-1	-0.448144	-0.567853	-0.37603
pas-1	0.00994966	0.240637	0.5955
pas-2	-0.360649	-0.306015	-0.154524
pas-3	0.026795	0.165134	0.174143
pas-4	-0.238659	0.252834	0.216385
pas-5	0.489338	0.236492	0.262089
pas-6	0.147846	0.309532	0.247611
pas-7	-0.105861	-0.00536597	-0.0816147
pat-10	0.197054	0.225155	0.0255821
pbs-1	0.25594	0.172622	0.644634
pbs-5	0.305693	0.209882	0.453558
pbs-6	0.0522314	0.000762213	-0.0275827
pbs-7	-0.103899	-0.116967	-0.100182
pcca-1	-0.0140754	0.0895756	-0.258417
pccb-1	-0.1109	-0.193352	-0.240796
pdi-1	0.166425	0.452864	0.604817
pdi-2	-0.184656	-0.211283	-0.0390304
pdi-3	-0.114249	-0.231421	-0.206345
pes-9	0.0490384	-0.0719252	-0.18751
pfn-1	-1.13559	-0.320049	-0.273026
pfn-3	0.344458	0.168034	0.654662
pgk-1	0.171138	0.210681	0.0875617
phb-1	0.055977	-0.143361	-0.180233
phb-2	0.0881364	-0.00159749	-0.075805
plp-1	0.352814	0.0935455	0.357518
pmt-1	-0.260302	-0.341584	-0.383431
pmt-2	-0.205387	-0.237832	-0.539757
pph-5	0.371806	0.0072814	0.432264
pqn-59	-0.0236321	0.310473	0.535007
prdx-2	0.0847307	0.018181	0.138594
prdx-3	0.217034	0.135469	0.304962
prmt-1	0.103822	0.231434	0.323523
pyc-1	-0.363652	-0.468656	-0.348373
pyk-1	-0.168238	0.0352955	-0.300993
pyp-1	-0.174346	-0.282931	-0.102449
qdpr-1	0.120346	0.478824	0.682333
R02D3.1	0.0077146	0.00649376	0.0273899
R04F11.2	-0.0688783	-0.0740381	-0.00176265
R05D3.6	-1.26462	0.250065	0.525648
R05G6.7	0.143738	0.21998	0.354412
R05H10.5	1.35641	1.49894	1.33729
R07E4.3	-0.198114	-0.0875278	-0.399202
R07H5.8	-0.176073	-0.0709411	-0.190492
R09B3.3	-0.223128	-0.405243	-0.0376617
R11A5.4	-0.308157	-0.335953	-0.616652
R151.2	-0.365829	-0.820907	-0.540702
R53.4	0.0605574	-0.0457226	-0.0121799
rab-1	-0.295885	-0.379487	-0.0972457
rab-6.1	-0.0385027	-0.118184	-0.0275114
rab-6.2	-0.0385027	-0.118184	-0.0275114
rack-1	0.0237608	-0.103954	-0.129036
rad-23	-0.0690114	0.0145909	0.277185
ran-1	0.197205	0.135602	0.307309
ran-3	-0.213723	0.220045	0.20173
ran-4	-0.305222	-0.426685	-0.176419
ril-1	0.380268	-0.0322254	-0.696746
rla-0	-0.0379839	-0.0549601	-0.122194
rla-1	0.123453	-0.18076	-0.0512622
rla-2	-0.177413	-1.26495	0.502212
rpl-1	-0.0709585	-0.198932	-0.104836
rpl-10	-0.185909	0.0121612	-0.0880185
rpl-11.1	0.0277592	0.0284053	0.121084
rpl-11.2	0.0277592	0.0284053	0.121084
rpl-12	-0.189081	0.0228757	-0.0653652
rpl-13	-0.240538	0.0581535	-0.0449978
rpl-14	-0.117004	0.12567	0.0615896
rpl-15	0.117234	0.106721	0.057856
rpl-16	-0.0695326	0.192577	-0.0948539
rpl-17	-0.114564	0.107023	-0.0235516
rpl-18	-0.123882	-0.0275197	-0.133103
rpl-19	0.0366368	0.0557715	0.0395993
rpl-2	-0.106301	-0.0930684	-0.161924
rpl-20	-0.251811	0.028663	-0.0881387
rpl-21	-0.757571	0.614431	0.375193
rpl-22	-0.0613886	0.147886	-0.108845
rpl-23	-0.296533	-0.118726	-0.162166
rpl-24.1	-0.578361	0.114296	0.0197546
rpl-25.1	-0.0744868	-0.133625	-0.160472
rpl-25.2	-0.144187	-0.0921706	-0.107987
rpl-26	-1.10018	-0.0390725	-0.0638914
rpl-27	-0.227105	-0.0503849	0.0154374
rpl-28	-0.0715914	-0.0310137	-0.155631
rpl-3	-0.168649	-0.130297	-0.204762
rpl-30	-0.384277	-0.197534	-0.122898
rpl-31	0.554229	0.293688	0.301508
rpl-32	-0.127711	-0.0680184	-0.167771
rpl-33	-0.305057	-0.237936	0.0103242
rpl-34	-0.713311	-0.0113519	-0.00816506
rpl-35	-0.311482	0.054037	-0.00607347
rpl-36	-0.110542	0.0596468	0.0641173
rpl-38	-0.848016	-0.341531	-0.0657789
rpl-39	-0.199507	-0.364412	-0.323683
rpl-4	-0.0896083	-0.104366	-0.139974
rpl-41	-0.0923322	-0.189624	-0.178149
rpl-43	-0.269235	-0.0725975	-0.0561318
rpl-5	-0.0843759	-0.0737708	-0.0839694
rpl-6	-0.206527	-0.205867	-0.123692
rpl-7	-0.169258	0.0141819	-0.02551
rpl-7A	-0.437299	-0.259978	-0.380023
rpl-9	-0.0717157	-0.0523692	-0.146211
rpn-1	0.146882	0.257688	-0.137065
rpn-6.1	-0.0390829	-0.0257156	0.0408153
rps-0	-0.0280569	-0.0418162	-0.149029
rps-1	-0.0488301	-0.189327	-0.226735
rps-10	-0.170594	-0.0232608	-0.0585281
rps-11	-0.691252	0.0717054	-0.0755749
rps-12	0.0761662	-0.153183	-0.0553458
rps-13	-0.477643	-0.183681	-0.175564
rps-14	-0.54894	0.0259313	-0.281349
rps-15	-0.11301	0.0659065	-0.0386569
rps-16	-0.431859	-0.131137	-0.299973
rps-17	0.0773525	0.00460829	-0.0187811
rps-18	-0.20379	-0.00905337	-0.0273789
rps-19	-0.442197	-0.138112	-0.154321
rps-2	-0.300664	-0.0138128	-0.0558108
rps-20	-0.373703	-0.0311843	-0.0839036
rps-21	0.0357156	-0.0756181	-0.211113
rps-22	-0.0799033	-0.0795614	-0.0885395
rps-23	-0.778202	0.0986283	-0.16481
rps-24	-0.0239738	0.016416	-0.111438
rps-25	-0.18071	-0.157612	-0.191459
rps-26	-0.437445	-0.0505839	-0.348389
rps-27	0.0821606	0.0431341	0.183477
rps-28	-0.22946	0.0441682	0.159658
rps-29	-0.523179	0.06606	-0.114964
rps-3	-0.196346	-0.145578	-0.0104574
rps-4	-0.483912	0.0271947	-0.0629564
rps-5	-0.0848348	-0.0951285	-0.168211
rps-6	0.147853	0.156366	0.0772828
rps-7	-0.0953074	-0.104265	-0.0852997
rps-8	-0.304028	-0.111133	-0.140659
rps-9	-0.121512	-0.173874	-0.240339
rpt-4	-0.109949	0.122889	0.444963
rpt-5	-0.109357	-0.228926	-0.07807
rsp-3	0.347294	0.500233	0.453402
sams-1	-0.364227	-0.310829	-0.449746
sar-1	-0.403094	-0.414841	-0.764745
sars-1	-0.115121	-0.420031	0.0891277
sca-1	0.121829	0.275303	0.119755
sdha-1	0.150045	0.144423	0.166345
sdha-2	0.150045	0.144423	0.166345
sdhb-1	0.517831	0.410328	0.62917
sec-23	0.334266	0.178296	0.253731
sgt-1	-0.389015	-0.413277	-0.295149
smo-1	0.48467	0.585666	0.639678
snr-3	0.246991	0.787129	0.543863
snr-6	0.325473	0.728428	1.11198
sod-1	0.233492	-0.188224	0.488807
sod-5	0.233492	-0.188224	0.488807
spc-1	0.227479	0.223274	0.168649
spp-5	0.00143371	-0.123426	0.337081
sqd-1	-0.12086	-0.13735	-0.112576
sti-1	-0.183508	-0.137861	0.081871
T01C8.5	-0.244417	-0.594193	0.0896439
T02H6.11	-0.0921003	-0.153366	-0.127772
T03F1.11	0.167102	0.156886	0.290237
T05E11.3	0.13426	0.147462	0.295056
T05H10.6	0.346631	0.482204	0.443923
T05H4.6a	-0.39824	0.0895745	-0.0967098
T08B2.7	-0.0110002	0.345914	0.132488
T08H10.1	-0.0333737	-0.302279	-0.471644
T09B4.8	-0.00176305	-0.0226448	-0.116411
T10G3.8	0.134917	-0.274011	-0.353433
T12D8.6	-0.0911174	-0.189935	0.0766609
T14G10.5	-0.191558	-0.512873	-0.354619
T14G8.3	-0.228676	-0.223814	-0.0793421
T19B10.2	-0.193488	-0.264083	-0.231214
T22B11.5	0.0906465	0.0983414	-0.113642
T22D1.4	-0.530556	-0.679786	-0.511774
T22F3.3	0.0540117	0.176981	0.122896
T25B9.9	0.0896258	0.144672	0.270214
T25F10.6	0.196463	0.0377463	-0.0562357
T27E9.2	0.227977	0.0563225	0.041245
tag-174	-0.17199	-0.133869	0.102298
tag-210	-0.0923828	0.0386367	-0.0916979
tag-320	-0.195729	-0.559217	-0.36296
tba-1	0.156074	0.303524	0.607262
tba-2	0.314409	0.447793	0.536374
tba-4	0.156074	0.303524	0.607262
tbb-1	0.263011	0.29471	0.548698
tbb-2	0.263011	0.29471	0.548698
tct-1	-0.146126	-0.182192	-0.265984
tfg-1	0.112924	0.302634	0.338629
tkt-1	-0.153694	-0.355294	-0.28565
tni-4	0.0749371	-0.127146	-0.0596511
tnt-2	0.0584773	-0.415006	-0.737446
tomm-22	-0.092659	-0.235578	-0.142719
tpi-1	0.38448	0.594171	0.469523
trap-1	-0.141006	-0.110318	-0.323058
trap-4	-0.192272	-0.225479	-0.166422
tsn-1	-0.218238	-0.326991	-0.350871
ttn-1	0.338481	0.127101	0.0955968
tufm-1	0.0740595	0.591109	0.113352
uba-1	0.275398	0.0331166	0.0160174
ubl-1	0.0450698	-0.218435	-0.0345176
ubq-1	0.163327	0.166539	0.362979
ubq-2	0.163327	0.166539	0.362979
ucr-1	0.0039931	-0.028525	0.108541
ucr-2.1	-0.0323383	-0.0827041	-0.132696
ucr-2.2	-0.109285	-0.0169656	-0.0909344
unc-108	-0.0878976	0.191671	-0.294217
unc-15	0.0713579	-0.0360264	-0.244276
unc-27	0.268088	0.0857618	0.841905
unc-44	0.500079	0.220885	0.49472
unc-54	0.0680097	0.0310909	-0.196697
unc-60	0.0575159	0.274656	0.260648
unc-87	0.0724724	-0.117702	-0.108515
upb-1	0.281911	-0.135149	-0.211947
vab-10	0.684197	0.269947	0.639829
vars-2	0.0184567	-0.581105	-0.69165
vha-10	-0.285572	-0.327261	-0.161389
vha-11	-0.531792	-0.675212	-0.339039
vha-12	-0.182824	-0.217444	-0.0849145
vha-13	-0.164649	-0.226578	-0.180797
vha-14	-0.0544425	-0.111363	0.144368
vha-15	0.0271739	-0.342868	-0.274416
vha-16	-0.0314987	-0.00630566	0.0532616
vha-2	-0.162963	0.168234	0.0782562
vha-8	-0.121143	-0.272415	-0.155662
vha-9	-0.198265	-0.0794548	-0.156282
vig-1	-0.208834	-0.340443	-0.204122
W02F12.5	-0.473724	-1.07399	-0.668566
W05G11.6	0.360119	-0.000647212	-0.371075
W06H3.3	-0.0958072	-0.204821	-0.250312
W08E12.7	-0.00567087	0.00569325	-0.179633
W09C5.8	-0.0337426	0.0510311	-0.0787175
W10C8.5	-0.1599	-0.157889	-0.38623
Y105E8B.5	-0.682125	-0.362321	-0.646723
Y22D7AL.10	0.0453203	-0.096652	-0.0594166
Y24D9A.8	0.0123184	-0.0101628	-0.00988904
Y25C1A.5	0.0941512	-0.0153051	-0.0493011
Y34B4A.6	-0.124981	-0.0308219	0.254742
Y37D8A.2	-0.0780545	0.0171878	0.105337
Y37E3.8	-0.707816	0.0620919	-0.0451883
Y38F1A.6	-0.0576673	-0.365352	-0.277885
Y39G10AR.8	-0.374351	-0.209958	-0.199787
Y39G8B.1	0.199503	0.456045	0.349693
Y39G8C.2	0.506603	0.106122	-0.0303094
Y43F4B.5	-0.114	-0.197802	0.0759258
Y48A6B.3	0.15777	0.0106821	0.0234337
Y53G8AL.2	0.11205	0.17431	0.405057
Y54E5A.5	-0.313589	-0.00516126	0.0588967
Y54G2A.2	0.233254	0.456354	0.474603
Y57G11C.15	0.0310464	0.0935787	0.483769
Y65B4BR.5	0.0243535	-0.0301934	-0.115466
Y66H1A.4	-0.0296017	-0.0973294	0.0459478
Y67D2.3	-0.593734	-0.294274	-0.0377593
Y67H2A.5	-0.395642	-0.105447	0.536303
Y69A2AR.18	-0.0923606	-0.291482	-0.160013
Y71F9AL.17	0.0382479	0.0744847	-0.00438551
Y71F9AL.9	-0.375216	-1.00576	-0.264084
Y71H10A.1	0.0639769	0.130609	0.108959
Y71H2AM.11	-0.13823	0.165305	0.230518
Y71H2AM.12	-0.0385027	-0.118184	-0.0275114
Y71H2AM.4	-0.134454	0.00171954	0.0113437
Y71H2AM.5	0.134989	0.128281	0.232747
Y94H6A.8	-0.163443	-0.0878916	-0.00671386
ZC247.1	0.511515	0.0929957	0.697758
ZC395.10	-0.0438556	-0.094752	-0.0565623
ZC443.1	-0.177531	0.244093	0.241206
ZK6.11	-0.257447	-0.530492	-0.593242
ZK829.4	0.357121	0.333196	0.422569

## Sheet: RNA-seq 16309 transcripts
Transcript	log2 fold change mRNA (mir-58.1 / WT)	log2 fold change mRNA (mir-80; mir-58.1 / WT)	log2 fold change mRNA (mir-80; mir-58.1; mir-81-82 / WT)	miR-80/81/82 predicted target by TargetScan	miR-58.1 predicted target by TargetScan	P_adjusted (mir-58.1 / WT)	P_adjusted (mir-80; mir-58.1 / WT)	P_adjusted (mir-80; mir-58.1; mir-81-82 / WT)
B0563.9	-0.575186	2.76989	7.27916	NA	NA	1	0.209286	6.62244e-16
T26H5.10	3.35801	5.27727	7.27783	NA	NA	0.180801	0.000180976	1.3548e-13
C02E7.10	1.222	1.4365	7.08986	NA	NA	0.884587	0.789374	1.38039e-20
B0507.6	4.35437	6.11354	6.90345	NA	NA	0.0111653	5.85661e-07	5.78026e-11
W08A12.4	1.35354	5.61344	6.57997	NA	NA	0.946441	1.49702e-05	1.57762e-09
Y53C10A.10	-1.36013	6.03058	6.3974	NA	NA	0.916089	2.20221e-11	3.2698e-14
lys-10	1.25962	4.96427	6.39297	NA	NA	0.193472	1.81311e-28	1.81029e-61
F07E5.9	0.667465	5.28238	6.22787	NA	NA	1	3.07583e-07	9.10638e-13
K05F6.10	1.45911	4.33251	6.09771	NA	NA	0.77287	0.000285745	2.45571e-12
F37E3.3	-1.17114	6.2454	6.04204	NA	NA	0.916089	5.92073e-13	1.42091e-11
Y105C5A.13	2.04645	3.28678	6.0254	NA	NA	0.61599	0.0969354	5.71727e-08
B0507.8	1.46442	4.63009	5.88828	NA	NA	0.566695	3.46638e-06	8.47878e-14
ilys-2	1.26143	5.01178	5.80328	NA	NA	0.0244924	2.07079e-48	2.19736e-68
F35H8.1	-0.373394	5.37397	5.76549	NA	NA	1	9.5005e-05	7.22552e-06
F47B3.2	-1.7561	5.75981	5.74147	NA	NA	0.799117	7.12673e-13	5.65133e-13
F42C5.3	2.10334	4.26468	5.70814	NA	NA	0.763738	0.0163054	1.10623e-05
C17H1.3	1.89986	4.91919	5.69564	NA	NA	0.848182	0.000296825	1.57779e-06
F09E8.1	2.10334	5.731	5.6818	NA	NA	0.763738	1.10287e-05	1.01561e-05
Y38H6C.15	1.19435	4.92896	5.65779	NA	NA	0.946441	0.000889067	9.6512e-06
Y75B8A.39	3.14995	4.73906	5.60611	NA	NA	0.287813	0.00264727	2.36726e-05
B0524.2	-0.279936	5.88251	5.54058	NA	NA	1	4.46573e-06	2.51033e-05
sri-36	0.720064	4.81439	5.52309	NA	NA	1	0.00179191	5.166e-05
sri-70	3.88471	4.27197	5.50092	NA	NA	0.000968218	0.000393619	9.61727e-09
T13F2.9	-2.68607	5.65501	5.46072	NA	NA	0.0991106	1.51147e-29	3.35453e-26
C53A5.9	0.979292	4.75873	5.43305	NA	NA	0.946441	0.000734483	1.07829e-05
msp-59	-2.66637	5.30329	5.42759	NA	NA	0.463441	1.04192e-13	4.67026e-15
F20D6.1	-1.09095	5.48283	5.42758	NA	NA	0.916089	8.54835e-08	1.12117e-07
nep-9	-0.794542	5.30926	5.42136	NA	NA	0.961133	2.12034e-09	3.49706e-10
F36D4.1	-0.373394	5.14466	5.42014	NA	NA	1	0.000426974	6.34821e-05
T08B6.9	-1.12843	5.35251	5.41911	NA	NA	0.611618	7.76519e-18	1.03272e-18
ZK355.8	1.96598	4.27731	5.4129	NA	NA	0.763738	0.0108155	6.08018e-05
F30A10.12	-0.0909504	5.56657	5.40325	NA	NA	1	3.8347e-05	8.63943e-05
F52F12.8	-0.360126	5.05362	5.36893	NA	NA	1	0.000428684	5.40307e-05
F14H3.6	0.737459	4.76564	5.34038	NA	NA	1	0.00148721	6.34211e-05
C24G7.1	0.0603814	2.43936	5.32719	NA	NA	1	0.0037262	6.11938e-29
msp-152	-3.54705	5.24951	5.31109	NA	NA	0.100137	1.41473e-20	1.98756e-21
F37C4.8	-0.373394	5.47347	5.30863	NA	NA	1	7.40348e-05	0.000123438
R08A2.3	-0.453585	5.76159	5.29968	NA	NA	1	6.02578e-06	7.54746e-05
C28D4.4	1.16321	5.40537	5.28868	NA	NA	0.946441	6.30008e-05	7.60261e-05
F48G7.2	2.01292	4.01193	5.25976	NA	NA	0.32531	0.000319757	3.38945e-09
C31B8.4	1.69586	4.2068	5.24359	NA	NA	0.587489	0.000836636	4.55508e-07
ZK1307.4	-0.24138	4.85093	5.24288	NA	NA	0.969384	4.13225e-07	4.01153e-09
H27M09.5	-0.360126	5.08813	5.23163	NA	NA	1	0.000357836	0.000106199
F32B6.10	1.31199	4.77233	5.22002	NA	NA	0.946441	0.00219301	0.00013694
C17H12.12	-0.0145109	4.99117	5.21798	NA	NA	1	3.77766e-17	4.45081e-20
ZK265.3	-2.00666	5.35053	5.20498	NA	NA	0.114617	5.31811e-29	1.80368e-26
pitr-5	0.639264	3.73766	5.19842	NA	NA	0.255889	2.02438e-31	1.72385e-64
R07C3.4	-2.1316	4.9015	5.18739	NA	NA	0.579951	7.05768e-09	7.16201e-11
msp-79	-2.17114	4.80091	5.13239	NA	NA	0.579951	1.23532e-08	9.42899e-11
ZK945.8	1.08389	4.58759	5.12624	NA	NA	0.976524	0.000100198	1.18205e-06
F21C3.7	-1.94509	4.93727	5.11231	NA	NA	0.799117	9.25854e-08	1.14564e-08
ZK177.9	0.817649	3.41957	5.11051	NA	NA	1	0.15255	0.000419231
F59A6.2	-0.566274	4.4658	5.0851	NA	NA	0.769826	1.72007e-06	5.94072e-10
srj-29	0.546415	2.98548	5.08459	NA	NA	1	0.209216	0.000295088
EGAP1.1	2.63115	3.52017	5.06419	NA	NA	0.43765	0.0969354	0.000298823
ZK666.8	0.327889	5.17757	5.03598	NA	NA	1	7.6166e-11	4.66824e-10
T23B3.5	-1.15151	4.69957	5.02794	NA	NA	0.627979	6.12905e-08	5.33205e-10
Y51A2A.4	2.88957	2.88046	4.99677	NA	NA	0.353653	0.265074	0.000426522
M01E5.1	1.29062	4.97985	4.994	NA	NA	0.946441	0.000734524	0.000427031
C10G11.8	-3.49741	4.86531	4.99173	NA	NA	1.02807e-05	4.05366e-39	7.51935e-42
F49H6.5	1.79252	3.64156	4.97882	NA	NA	0.168998	2.5518e-05	1.58984e-13
wht-8	-1.24402	4.78967	4.95725	NA	NA	0.562388	2.70266e-11	6.78122e-13
Y53H1C.3	-2.01231	4.70131	4.94841	NA	NA	0.799117	1.42386e-06	7.96549e-08
F28D1.8	-0.360126	4.11965	4.94708	NA	NA	1	0.0200746	0.000438348
F22B3.8	-0.328583	4.72193	4.94506	NA	NA	0.991192	2.59676e-09	5.71208e-11
fbxa-165	1.56275	3.81756	4.94219	NA	NA	0.376659	6.85262e-05	3.11514e-10
fbxa-163	1.78222	4.21438	4.9087	NA	NA	0.380096	4.68009e-05	7.46884e-08
E03H12.7	-3.34049	4.5089	4.90698	NA	NA	0.150352	4.39404e-11	9.1343e-15
F35H8.4	1.43004	4.9575	4.9013	NA	NA	0.856906	0.000211684	0.000182385
R07C3.13	-0.890424	5.31805	4.89674	NA	NA	0.961133	8.40601e-10	1.2664e-07
B0379.7	-1.76719	4.64149	4.88431	NA	NA	0.385533	1.26282e-12	4.02106e-15
nep-8	-2.7561	4.89262	4.87712	NA	NA	0.287813	4.94384e-12	4.66647e-12
thn-1	0.896191	3.15403	4.86929	NA	NA	0.377673	4.51876e-08	9.1969e-30
C55C2.4	-0.453585	3.81501	4.86519	NA	NA	1	0.0404466	0.000741409
R09E10.6	-3.4979	4.91164	4.8587	NA	NA	2.25825e-08	5.18015e-49	6.85405e-48
F15H9.1	-0.305462	4.96726	4.84752	NA	NA	1	4.65129e-06	1.03112e-05
T08E11.1	2.86957	4.39028	4.84536	NA	NA	0.000220365	1.39499e-10	1.43882e-14
T26H5.9	1.21549	2.57821	4.83767	NA	NA	0.00612804	3.95804e-11	8.41095e-54
msp-3	-2.79816	4.75319	4.82057	NA	NA	0.021724	4.44415e-22	3.72262e-23
F10E9.2	1.14416	4.78122	4.81567	NA	NA	0.81612	6.04183e-07	3.83013e-07
C50D2.3	-0.259285	4.72059	4.81499	NA	NA	0.969384	9.65419e-07	2.65494e-07
F38A5.8	-0.360126	4.9639	4.79541	NA	NA	1	0.000740247	0.000992705
C16D2.1	-0.606926	4.43977	4.79138	NA	NA	0.768981	1.35679e-06	1.65783e-08
F44G4.5	-1.13559	4.74924	4.78766	NA	NA	0.655791	3.37919e-10	1.54304e-10
F53H2.1	2.45526	4.07886	4.78006	NA	NA	0.0386639	1.0426e-05	4.15074e-09
F07E5.8	-2.71657	4.70468	4.77662	NA	NA	0.289468	2.74723e-10	4.81308e-11
nspd-2	-3.14609	4.57724	4.76755	NA	NA	0.00292216	7.07806e-24	3.86498e-27
D1081.5	-3.74304	4.53955	4.76603	NA	NA	0.030437	4.3794e-15	7.0421e-18
F18A1.1	-0.364373	3.74773	4.75984	NA	NA	0.969384	0.00116236	4.54488e-07
F27C1.1	-4.10244	4.94429	4.74458	NA	NA	2.12524e-05	4.37288e-36	6.37162e-32
T22A3.6	-0.435101	4.58873	4.74222	NA	NA	1	6.0148e-05	9.56699e-06
Y46G5A.34	-0.265924	4.37299	4.73864	NA	NA	1	0.000460493	2.82044e-05
C27D6.11	-2.72013	4.66919	4.73791	NA	NA	0.130323	4.01738e-15	5.92174e-16
C08F11.10	-2.10466	4.67825	4.72125	NA	NA	0.248971	6.61348e-15	1.61964e-15
nhx-6	1.60491	0.773003	4.72025	NA	NA	0.501595	0.909645	6.23933e-07
Y46G5A.14	0.215646	4.79058	4.71681	NA	NA	1	1.20027e-05	1.22967e-05
sdz-35	1.39514	2.3903	4.71614	NA	NA	0.772709	0.180995	1.33638e-05
C27D6.3	-3.13366	4.64669	4.71552	NA	NA	0.213703	5.03615e-11	1.0596e-11
F54C1.8	-0.517632	4.85922	4.71149	NA	NA	1	4.61409e-06	1.05866e-05
W01B6.5	-0.353166	4.34006	4.70475	NA	NA	0.969384	2.40217e-05	6.48244e-07
T11F8.1	-1.36013	4.41379	4.69971	NA	NA	0.916089	0.000246311	2.48577e-05
ZK596.2	-0.300515	4.64134	4.69566	NA	NA	0.980943	5.53084e-08	2.07721e-08
sss-1	-4.23548	4.86254	4.68065	NA	NA	0.00347688	7.02846e-24	4.1448e-21
T28H11.7	-1.61632	4.82142	4.67734	NA	NA	0.235323	2.10544e-17	9.33523e-16
F44G3.2	-0.134119	3.04129	4.67057	NA	NA	0.930119	7.54338e-13	2.99413e-41
F02E9.3	-0.794542	4.38833	4.64875	NA	NA	0.961133	2.41975e-05	2.05009e-06
B0218.7	-2.80333	4.61944	4.64552	NA	NA	0.0151807	4.03549e-21	1.63924e-21
B0284.2	1.81765	4.20024	4.63877	NA	NA	0.856906	0.0200775	0.00315641
B0432.11	-0.320588	4.34234	4.63861	NA	NA	1	0.000541952	5.86948e-05
his-67	2.35633	3.68002	4.61045	NA	NA	0.61599	0.0782725	0.00318911
ZC190.8	0.546415	4.5877	4.60462	NA	NA	1	0.0039512	0.00217399
Y57G11A.2	-3.69259	4.56804	4.60193	NA	NA	4.45514e-09	1.2154e-41	3.54675e-42
B0238.13	1.28775	0.661418	4.59698	NA	NA	0.634764	0.983519	2.97863e-06
math-28	1.5939	3.74214	4.59642	NA	NA	0.856906	0.0500343	0.00259598
Y57G11C.23	-2.74397	4.6566	4.59575	NA	NA	0.463644	6.81498e-09	9.61727e-09
K06A1.2	0.175865	4.72091	4.58067	NA	NA	1	3.57902e-09	1.83465e-08
K09C6.1	-0.0820083	3.98399	4.57551	NA	NA	1	4.83676e-07	8.51032e-11
F58E6.5	-3.24291	4.64158	4.56293	NA	NA	0.0113566	1.05477e-19	1.03272e-18
fbxa-125	-0.212249	4.30486	4.56026	NA	NA	0.991192	6.05106e-07	1.66367e-08
F10G7.6	0.774729	4.8163	4.55978	NA	NA	1	0.00179129	0.0039103
ZK688.12	-0.131603	4.38756	4.55781	NA	NA	1	0.000394253	0.000106756
T05C12.9	0.163208	4.11331	4.55576	NA	NA	1	0.00115011	6.34211e-05
T26H5.4	2.0057	3.10798	4.55274	NA	NA	0.763738	0.169595	0.00379504
msp-81	-4.89439	4.60042	4.54824	NA	NA	5.91642e-08	6.28296e-36	1.39596e-34
F32B6.4	-2.44859	4.72067	4.54719	NA	NA	0.0131494	1.73124e-26	1.34521e-23
C18H2.5	-2.15629	3.86113	4.5465	NA	NA	0.323664	1.76077e-06	1.00144e-10
T06D4.2	1.66746	5.35005	4.54105	NA	NA	0.856906	0.000102336	0.00381179
oac-27	-0.805649	4.22191	4.54051	NA	NA	0.769905	6.39533e-06	2.10191e-07
F28E10.4	-2.39386	4.50883	4.53955	NA	NA	0.580293	7.56055e-07	3.83161e-07
F07A5.2	-3.70234	4.63208	4.53026	NA	NA	3.81099e-06	5.67147e-35	1.02638e-32
msp-40	-3.30914	4.59766	4.5292	NA	NA	0.000189502	3.63257e-30	8.8159e-29
Y6E2A.10	0.135641	4.13044	4.525	NA	NA	1	5.50573e-07	2.90073e-09
C34F11.2	-2.62718	4.39863	4.51997	NA	NA	0.131526	3.96574e-12	2.02335e-13
msp-50	-1.76122	4.66019	4.51834	NA	NA	0.0828981	1.76533e-26	5.85325e-24
sfxn-1.2	-0.38533	4.53464	4.51385	NA	NA	0.941844	1.06433e-11	1.38027e-11
fbxa-12	4.23842	4.31451	4.5083	NA	NA	0.0111363	0.00883931	0.00462506
Y43F8B.15	2.32461	3.68704	4.50629	NA	NA	0.302412	0.00919619	0.000130467
F36H5.10	1.72529	3.66222	4.5054	NA	NA	0.856906	0.0782725	0.00574792
C15C6.2	-2.98845	4.51586	4.50459	NA	NA	8.08575e-05	1.12823e-33	2.93001e-33
Y69E1A.1	-3.6246	4.63997	4.50429	NA	NA	4.13253e-07	1.96277e-38	2.89806e-35
C25D7.16	-2.32059	4.1401	4.49735	NA	NA	0.579951	2.22659e-05	5.99698e-07
Y106G6D.3	0.425848	3.64031	4.4793	NA	NA	1	4.85291e-06	2.75901e-11
Y40H4A.2	-1.82127	4.63424	4.47674	NA	NA	0.407222	6.82182e-10	3.68159e-09
T20B6.2	-1.38647	4.18223	4.47582	NA	NA	0.631295	1.17653e-05	4.37701e-07
C54D10.4	-2.15629	4.51175	4.47458	NA	NA	0.323664	2.68531e-10	3.61177e-10
F36D1.4	-2.45358	4.63923	4.46877	NA	NA	0.579951	9.81448e-08	4.29721e-07
W03D8.3	0.104529	4.33895	4.46687	NA	NA	1	2.40318e-05	5.92715e-06
F43G6.6	-2.7687	4.40181	4.45287	NA	NA	0.28751	1.03071e-08	2.93736e-09
msp-19	-4.34529	4.71762	4.4527	NA	NA	0.00544695	7.11104e-21	2.51573e-17
Y105C5A.9	-0.171141	2.02064	4.45098	NA	NA	1	0.730889	0.00461504
Y39A3A.4	2.8082	3.07119	4.44913	NA	NA	0.0320716	0.0170042	4.37636e-06
spe-11	-3.66242	4.06472	4.44677	NA	NA	0.00225706	5.93376e-15	5.25654e-20
C49A1.2	-0.434402	4.21057	4.42999	NA	NA	0.991192	9.89031e-07	6.20169e-08
F47D12.7	-3.52559	4.45784	4.42671	NA	NA	0.00504898	5.70945e-19	1.24054e-18
Y6E2A.4	2.31268	2.85448	4.42535	NA	NA	0.0248524	0.00612064	3.63273e-09
msp-33	-3.4613	4.50685	4.41309	NA	NA	0.000369248	1.63137e-25	6.25215e-24
C17E4.1	-1.17114	3.91912	4.41036	NA	NA	0.916089	0.00265039	0.000154239
C46E10.1	-2.1617	4.29687	4.40723	NA	NA	0.14019	5.26423e-12	4.20328e-13
oac-10	-3.75192	3.98681	4.40272	NA	NA	0.070689	7.56876e-09	3.92636e-12
cyp-35B2	2.88173	2.51117	4.4027	NA	NA	0.224556	0.324852	0.00255846
F55C5.1	-1.61226	4.28569	4.38975	NA	NA	0.101762	2.01494e-19	6.0272e-21
F26E4.5	-0.0414745	3.8463	4.38432	NA	NA	1	0.000489141	7.43181e-06
chaperone	-0.367258	4.30325	4.37246	NA	NA	0.764537	5.25635e-14	7.61612e-15
C01A2.6	2.92439	4.54275	4.37127	NA	NA	0.353653	0.00486904	0.00837819
F53B2.5	-2.41549	4.49304	4.3701	NA	NA	0.0774679	1.23847e-15	1.71946e-14
B0273.1	2.40437	3.19005	4.36712	NA	NA	0.000197195	7.01724e-07	3.10583e-17
nspd-1	-3.67071	4.14894	4.36644	NA	NA	3.6255e-07	1.13424e-28	6.6559e-33
T22B3.3	-3.51261	3.86198	4.36197	NA	NA	0.10177	1.50038e-07	4.62835e-11
srr-6	1.24168	2.92694	4.36138	NA	NA	0.261017	8.31092e-05	1.03505e-14
F47F6.4	-0.453585	4.23154	4.35694	NA	NA	1	0.0131785	0.00477709
clec-153	-0.606886	4.32819	4.35169	NA	NA	0.891092	5.40497e-07	2.6432e-07
Y38H8A.2	-0.360126	4.22187	4.34702	NA	NA	1	0.000608155	0.000210846
Y49F6B.8	-1.7576	4.5177	4.33877	NA	NA	0.385847	1.7289e-11	2.65657e-10
C14A6.3	2.52158	3.7126	4.33616	NA	NA	0.0151557	2.56323e-05	2.01026e-08
R06B9.1	1.7715	2.98134	4.33246	NA	NA	0.502982	0.0530569	0.000203161
M02B1.4	-0.968661	4.50492	4.32927	NA	NA	0.60321	2.64148e-12	6.09366e-11
C50E10.1	-2.29376	4.40485	4.32684	NA	NA	0.0430574	1.47848e-18	1.38083e-17
F42C5.5	-1.17382	4.25737	4.32675	NA	NA	0.658644	4.53214e-07	1.40308e-07
Y39F10C.1	-2.11385	4.21028	4.31599	NA	NA	0.799117	3.58429e-05	1.25689e-05
clec-117	-2.46153	4.45242	4.31405	NA	NA	0.463428	9.72989e-08	3.06968e-07
F56D5.2	-1.33389	4.18404	4.3052	NA	NA	0.565136	2.81357e-07	4.1544e-08
tbb-6	2.22211	1.65857	4.30484	NA	NA	2.48833e-13	4.89198e-05	2.51719e-47
Y53F4B.36	0.891008	4.40996	4.30466	NA	NA	0.976524	0.000156782	0.000236623
Y50E8A.6	-2.17114	3.93691	4.30348	NA	NA	0.579951	8.22213e-05	2.33449e-06
C28D4.5	-2.03607	4.32447	4.29769	NA	NA	0.323664	7.40316e-09	7.61696e-09
nspd-10	-2.87712	4.43495	4.29221	NA	NA	0.100017	5.49075e-13	8.41224e-12
Y57A10B.7	-1.83444	4.40749	4.28898	NA	NA	0.40654	1.18118e-08	5.07616e-08
Y68A4A.13	2.12973	3.01396	4.28761	NA	NA	0.000423648	7.42262e-07	4.66797e-19
C54D10.8	1.5462	3.49968	4.27902	NA	NA	0.770975	0.0193366	0.000505273
F13H8.12	-0.3862	4.23421	4.2775	NA	NA	1	0.00486904	0.00387064
thn-2	1.51726	2.53632	4.27504	NA	NA	2.95648e-10	2.6429e-21	1.50564e-48
K01H12.4	-1.6613	4.11473	4.26991	NA	NA	0.236243	1.90746e-10	7.1979e-12
Y39B6A.30	-0.403785	3.80443	4.26762	NA	NA	0.791203	2.97123e-07	2.31888e-10
W01B6.6	-2.80597	4.22403	4.26095	NA	NA	0.463366	6.80077e-07	2.73212e-07
Y42H9AR.2	-0.131702	4.13177	4.25821	NA	NA	1	9.22774e-06	2.36928e-06
F17E9.5	-3.14017	4.48918	4.25802	NA	NA	2.56884e-09	2.11501e-44	6.56379e-39
F49C12.2	2.80682	5.89865	4.2566	NA	NA	0.0503844	9.50714e-14	5.31886e-05
C15H11.1	-2.66637	4.07746	4.25607	NA	NA	0.463441	4.68465e-06	4.54488e-07
ZK484.5	-4.11747	4.21434	4.25149	NA	NA	2.01521e-17	5.00014e-44	1.6731e-44
F44D12.4	-2.47045	4.45073	4.25063	NA	NA	2.1382e-07	5.79256e-45	3.50798e-40
E03H12.5	-2.54093	3.71585	4.2501	NA	NA	0.185309	1.00191e-06	4.09703e-10
ssq-1	-3.08075	4.49883	4.2464	NA	NA	5.69381e-08	6.12631e-42	5.24747e-36
msp-142	-3.0421	4.28278	4.23465	NA	NA	0.00133198	1.86046e-21	1.19327e-20
C49G7.7	2.75849	4.59778	4.2306	NA	NA	0.000915689	9.70846e-12	3.43517e-09
Y51H4A.22	-2.49307	4.37838	4.22656	NA	NA	0.463366	1.70759e-07	6.74642e-07
F18C12.4	-1.36013	4.35657	4.22501	NA	NA	0.916089	0.000393046	0.000529175
F36A2.10	-1.06066	4.22954	4.2243	NA	NA	0.380916	2.10544e-17	2.33397e-17
F36A4.3	-1.02039	4.56354	4.21762	NA	NA	0.961133	2.07559e-06	2.78758e-05
phophatase	-3.22712	4.31351	4.21628	NA	NA	0.214266	7.47625e-09	2.42721e-08
F25F2.1	-0.703897	3.55354	4.21556	NA	NA	0.742098	8.43548e-07	2.23787e-11
C34F11.5	-1.21736	3.47857	4.21547	NA	NA	0.238658	1.686e-09	4.20664e-17
ZC239.14	2.05867	3.31516	4.21208	NA	NA	0.0429029	6.14402e-05	8.93067e-10
Y41C4A.7	-1.72871	4.03261	4.20988	NA	NA	0.386564	4.79616e-08	2.99634e-09
F44D12.3	-3.61786	4.2925	4.2094	NA	NA	9.4023e-10	5.02995e-37	6.47196e-35
Y53C12A.7	1.62238	4.17279	4.20867	NA	NA	0.856906	0.0163252	0.00855576
Y57G11B.7	-1.91885	4.51538	4.20633	NA	NA	0.799117	8.83608e-06	6.37563e-05
B0261.6	-2.66214	4.43966	4.20401	NA	NA	0.0137959	2.55637e-20	4.39622e-17
Y71G12B.22	-0.787305	4.0762	4.1986	NA	NA	0.891092	8.94046e-07	1.60688e-07
H04M03.1	-2.93842	4.32791	4.1986	NA	NA	0.00048355	9.51701e-25	1.6169e-22
Y67A10A.3	-2.26254	4.129	4.1944	NA	NA	0.239202	1.23002e-08	2.60037e-09
Y47D3A.31	-0.77809	4.17645	4.18989	NA	NA	0.489744	4.83705e-14	2.32766e-14
ilys-3	1.54893	1.8103	4.18863	NA	NA	0.174437	0.124792	1.9957e-10
T27A3.4	-2.83052	4.12782	4.17849	NA	NA	7.05689e-09	2.5849e-38	3.48332e-39
C24D10.2	-2.0807	4.05058	4.17152	NA	NA	0.321704	1.71758e-07	2.42721e-08
R09E10.3	-4.09164	4.204	4.16947	NA	NA	0.000119056	2.93144e-20	8.3691e-20
T04B2.8	-0.453585	4.37754	4.16926	NA	NA	1	0.00722908	0.0104143
T27E7.1	-3.46972	4.23435	4.15962	NA	NA	2.23404e-05	1.7747e-25	3.7892e-24
F40H6.1	-1.01438	4.49321	4.15753	NA	NA	0.563772	5.90281e-11	7.76315e-09
F08H9.2	-3.56697	4.55652	4.15717	NA	NA	0.00134201	1.26678e-22	4.63858e-17
msp-64	-4.79992	4.26369	4.15417	NA	NA	9.50484e-08	2.94922e-28	3.2304e-26
F32H2.7	-3.18306	4.32157	4.15087	NA	NA	4.6581e-05	1.66879e-27	2.26936e-24
Y44A6D.5	-1.56708	4.0355	4.14715	NA	NA	0.186027	3.2811e-12	2.02176e-13
C05C12.5	-2.00783	4.36255	4.14536	NA	NA	0.0912594	1.95451e-16	3.58296e-14
F58F12.3	-1.74304	4.19632	4.14384	NA	NA	0.404971	1.80521e-07	2.62118e-07
F52H3.6	-0.310819	4.29047	4.14281	NA	NA	0.80874	2.34615e-14	4.91288e-13
ZK354.2	-3.25794	3.95113	4.14214	NA	NA	3.38421e-05	2.30953e-21	1.36381e-24
C10G11.9	-3.43476	4.13174	4.14185	NA	NA	5.28873e-05	1.65838e-22	1.23901e-22
scrm-8	-1.10553	4.21241	4.1408	NA	NA	0.497602	8.20189e-12	2.26257e-11
Y6E2A.5	1.40888	2.88364	4.14068	NA	NA	0.478636	0.00879942	9.19926e-07
sfxn-1.1	-1.6127	4.27878	4.13964	NA	NA	0.458699	8.95625e-09	4.04353e-08
Y52D5A.2	-2.15151	3.86677	4.13949	NA	NA	0.579951	0.000118104	1.07504e-05
snf-9	-2.34226	4.21088	4.13476	NA	NA	0.00804436	3.1184e-21	4.03255e-20
math-38	2.03514	3.04461	4.13474	NA	NA	5.25522e-05	1.95222e-09	7.87912e-23
C05C12.1	-1.92765	4.00457	4.1334	NA	NA	0.310165	2.00451e-08	1.87352e-09
C48B6.4	-1.78549	3.9921	4.13178	NA	NA	0.239202	1.83238e-09	1.29985e-10
F14E5.6	-0.279936	3.40509	4.13126	NA	NA	1	0.15255	0.0194182
acdh-5	-0.781719	4.22336	4.13075	NA	NA	0.584367	2.40729e-13	1.5515e-12
C32C4.3	-2.74397	3.99215	4.12789	NA	NA	0.463644	1.21527e-05	2.07194e-06
C43F9.6	-4.51325	4.0462	4.12678	NA	NA	0.00360275	4.21775e-13	4.59187e-14
C27D8.2	-1.13596	3.7727	4.12486	NA	NA	0.321201	2.63914e-11	5.16713e-15
F33D11.7	-2.45358	4.44066	4.12312	NA	NA	0.579951	8.45573e-07	1.33638e-05
R08A2.1	-2.71251	4.09491	4.11966	NA	NA	0.463366	2.27991e-06	1.14629e-06
clec-142	0.0894738	3.6191	4.1164	NA	NA	1	0.000199201	1.56491e-06
ubxn-5	-3.50381	4.00316	4.1158	NA	NA	0.102204	2.21518e-08	2.7539e-09
T21G5.1	-0.90223	4.11456	4.11342	NA	NA	0.561347	1.72263e-08	1.40429e-08
R102.10	-0.127834	4.1113	4.1132	NA	NA	0.986605	5.06644e-13	3.29229e-13
K09C6.7	-0.802427	4.19599	4.11093	NA	NA	0.716354	8.39374e-10	2.39549e-09
pqn-84	-1.17114	3.6975	4.10806	NA	NA	0.916089	0.00767431	0.000806321
ssp-10	-2.78857	4.19713	4.10666	NA	NA	0.000288716	2.35441e-25	1.14769e-23
F21D9.2	-1.70894	4.46519	4.10547	NA	NA	0.387006	1.16212e-10	1.63003e-08
msp-38	-1.98452	3.8127	4.10526	NA	NA	0.0921861	1.23717e-10	1.73348e-13
Y47G6A.26	-1.98929	4.04623	4.10373	NA	NA	0.0919577	8.48749e-13	1.30371e-13
gska-3	-2.41514	4.03395	4.10287	NA	NA	0.00606325	1.91943e-19	1.64836e-20
C06C6.8	-0.171141	3.67521	4.09636	NA	NA	1	0.0627501	0.0157095
C34D4.3	-2.34049	4.48715	4.09569	NA	NA	0.106405	1.80593e-14	5.83231e-11
msp-31	-3.97872	4.22871	4.09501	NA	NA	0.00028453	1.40481e-19	9.30765e-18
T27A3.5	-2.5878	3.76892	4.09241	NA	NA	5.56114e-06	1.59305e-25	9.18946e-32
wht-6	-1.34045	4.18997	4.09153	NA	NA	0.397819	3.77954e-12	2.02321e-11
C50E10.2	-1.30647	4.173	4.08896	NA	NA	0.414004	4.49026e-10	1.15786e-09
T07E3.2	-0.279936	4.19564	4.08756	NA	NA	1	0.020091	0.0195258
Y6E2A.8	0.284447	3.61436	4.08404	NA	NA	1	0.000427334	1.07069e-05
K06A5.2	-2.80396	4.11895	4.08135	NA	NA	3.34283e-07	1.69528e-34	2.57741e-33
D2089.2	-1.36656	3.75511	4.07667	NA	NA	0.631976	0.000335929	2.12049e-05
ZC168.6	-3.34372	4.29114	4.07516	NA	NA	0.000352661	5.64178e-22	7.5204e-19
F55D12.6	-0.958831	4.20451	4.07315	NA	NA	0.563886	7.05469e-09	2.98656e-08
K07A1.4	-3.35008	4.22458	4.07314	NA	NA	0.149836	3.82667e-09	2.32921e-08
C10C6.3	-2.66637	3.68278	4.06909	NA	NA	0.463441	0.000137945	2.94066e-06
H05L14.1	-4.21858	4.05516	4.06852	NA	NA	0.00488876	1.79455e-13	9.15327e-14
C16A11.7	-2.99973	4.00632	4.06444	NA	NA	0.0515511	8.93316e-11	1.82883e-11
F44D12.8	-2.97477	3.8253	4.05769	NA	NA	0.0512553	1.55443e-09	1.42617e-11
C33H5.1	3.33818	5.79745	4.05291	NA	NA	0.137639	4.47266e-06	0.0239392
C35E7.9	-1.83141	3.46247	4.05076	NA	NA	0.401176	9.26486e-05	2.46697e-07
nep-5	-3.50381	4.11078	4.04828	NA	NA	0.102204	4.80193e-09	8.23089e-09
Y39E4A.1	-1.80652	3.99227	4.04502	NA	NA	0.799117	0.000180646	0.000103418
Y71G12B.27	-3.30597	3.97483	4.04117	NA	NA	0.10177	4.04212e-08	1.14187e-08
Y71G12B.3	-1.34005	4.0876	4.03788	NA	NA	0.413961	1.28592e-09	2.00153e-09
F59A3.8	-2.04245	3.94493	4.03355	NA	NA	0.146986	3.25614e-10	3.74939e-11
M28.9	-2.73375	4.03623	4.03341	NA	NA	0.0103581	4.02333e-15	2.88083e-15
C33F10.11	-3.16009	4.11478	4.03205	NA	NA	0.00293438	6.94745e-17	7.64924e-16
T02B11.9	-3.30597	3.61866	4.03021	NA	NA	0.10177	3.2074e-06	1.38693e-08
C04G2.8	-3.73002	4.18771	4.0234	NA	NA	8.93663e-18	3.40253e-45	2.07703e-41
Y49E10.10	-3.0722	3.94272	4.02277	NA	NA	0.0514418	1.92647e-10	2.78108e-11
mps-3	-2.21166	3.45315	4.02135	NA	NA	0.13923	1.97484e-06	4.25152e-10
sss-2	-3.40432	4.34075	4.01669	NA	NA	2.4643e-05	6.73354e-29	5.57066e-23
Y106G6G.4	-0.872606	3.91619	4.01506	NA	NA	0.330114	6.54995e-19	2.37614e-20
nspd-5	-2.46342	3.92881	4.01497	NA	NA	0.00128688	6.26701e-20	3.18437e-21
F54D1.1	0.109498	4.24367	4.01174	NA	NA	1	1.40945e-10	3.96987e-09
C49C3.11	1.40587	3.77763	4.0104	NA	NA	0.946441	0.0627355	0.0301172
F59A6.4	-2.55691	3.72934	4.01035	NA	NA	0.0143173	2.16391e-11	1.96852e-14
K09C6.2	-2.72771	3.32737	4.00872	NA	NA	0.463187	0.000903504	3.10197e-06
T23F6.3	-1.40858	3.86164	4.0086	NA	NA	0.124833	3.24632e-17	2.89585e-19
C35A5.4	-0.0127966	3.73358	4.00495	NA	NA	1	5.92665e-08	7.1758e-10
K08F4.5	-2.96731	3.70634	4.00416	NA	NA	0.210924	9.49647e-06	2.42695e-07
gln-2	-2.95963	3.99413	4.00274	NA	NA	3.75237e-07	7.99301e-30	6.24236e-30
F22B5.5	-3.3981	4.02058	4.00178	NA	NA	0.146945	2.87251e-08	2.69436e-08
R03D7.8	-2.83444	4.12701	4.0003	NA	NA	0.0706726	3.37812e-11	2.37661e-10
F21H7.5	-3.00293	4.09411	3.99855	NA	NA	0.00025555	1.57021e-21	4.32482e-20
D2062.7	-3.16748	4.31371	3.99842	NA	NA	0.211788	4.97157e-09	2.42481e-07
C18G1.3	-0.282674	3.80285	3.99678	NA	NA	1	0.00264727	0.000803845
W02D7.11	1.26151	0.967835	3.98853	NA	NA	0.946441	1	0.0298481
snf-10	-0.426843	4.08941	3.98783	NA	NA	0.770975	2.22659e-08	4.91624e-08
Y54G2A.15	-1.29061	4.08222	3.98666	NA	NA	0.518115	3.38557e-08	8.89968e-08
T05C12.3	-3.41063	4.04436	3.98556	NA	NA	0.00510524	1.01785e-13	2.89352e-13
Y57G11C.6	-3.48605	3.67114	3.97519	NA	NA	0.103011	2.07559e-06	3.04365e-08
ZK688.10	-1.35907	3.87037	3.97467	NA	NA	0.249388	3.85631e-12	2.89352e-13
ttr-9	-1.71234	3.86824	3.97156	NA	NA	0.500433	2.72818e-05	7.54117e-06
Y50D4B.7	2.27454	2.66864	3.97081	NA	NA	0.616026	0.414447	0.0253267
F22G12.1	1.29447	3.02403	3.97012	NA	NA	0.227302	1.09542e-05	2.92174e-12
F53E10.5	1.92927	4.00766	3.96942	NA	NA	0.503442	0.00225422	0.00216047
C53D6.10	-2.4727	3.72162	3.96908	NA	NA	0.23995	1.46596e-06	4.90992e-08
ZK858.2	-2.46627	4.01422	3.96762	NA	NA	0.181586	7.6193e-09	1.09875e-08
Y106G6A.4	-1.62443	4.24492	3.96708	NA	NA	0.189429	3.85216e-14	1.49384e-11
msp-49	-3.98821	4.22944	3.96573	NA	NA	0.000277377	1.03031e-19	3.26358e-16
T23G11.1	-1.55642	3.97167	3.96499	NA	NA	0.017333	2.05401e-25	2.86325e-25
F21H7.2	-2.07445	3.76043	3.95906	NA	NA	0.249209	1.543e-07	6.43542e-09
F10D11.5	-1.66545	3.66633	3.95587	NA	NA	0.291356	6.89894e-08	5.31725e-10
C44B7.5	-0.3862	5.28589	3.95323	NA	NA	1	3.27166e-05	0.0103824
R05D7.2	-0.373993	3.96219	3.95256	NA	NA	1	2.98423e-06	2.07194e-06
K09F6.3	-1.24728	3.70684	3.94573	NA	NA	0.047792	1.42373e-20	1.26077e-24
F40F9.3	-2.1011	3.69943	3.94041	NA	NA	0.145634	8.64544e-09	1.176e-10
Y54E2A.9	-1.272	4.04685	3.93924	NA	NA	0.517305	2.88838e-08	8.96574e-08
ssq-2	-3.63394	4.08725	3.93746	NA	NA	1.55737e-12	1.74877e-38	6.20326e-35
Y38H8A.3	-1.77625	4.03602	3.93615	NA	NA	0.00533785	8.75872e-27	6.86069e-25
tsp-18	-2.53872	3.81183	3.93454	NA	NA	0.462486	3.02887e-05	7.41514e-06
C30G7.3	-2.23795	3.90969	3.93173	NA	NA	0.0372444	2.18843e-14	9.53732e-15
ZK353.4	-0.176442	3.77404	3.93131	NA	NA	1	4.85072e-06	5.37834e-07
str-7	-2.30426	2.54196	3.92958	NA	NA	0.32217	0.0148711	3.41449e-07
T28F4.3	-0.277146	3.30346	3.92866	NA	NA	0.856485	0.000276667	5.65669e-07
H06H21.9	-3.04852	3.6997	3.92763	NA	NA	0.0516939	1.65187e-08	2.59892e-10
math-5	0.522399	3.0205	3.92495	NA	NA	1	0.137724	0.0155415
ZK546.3	0.0623856	3.87225	3.92293	NA	NA	1	3.55733e-10	9.44782e-11
Y73F8A.20	-2.33353	3.91223	3.91869	NA	NA	0.10634	1.66129e-09	1.02329e-09
D2062.4	-2.90555	3.66568	3.91831	NA	NA	0.358478	5.93279e-05	4.02971e-06
T27C10.8	-2.99236	3.77032	3.91665	NA	NA	0.0510553	2.89538e-09	1.50313e-10
ttr-14	-6.50987	3.81878	3.91577	NA	NA	2.09672e-13	6.79835e-27	8.8159e-29
Y47D3A.13	-2.84921	4.0072	3.9157	NA	NA	0.00517178	6.91964e-16	6.50662e-15
msp-77	-3.44097	4.12635	3.91437	NA	NA	0.000392104	4.38563e-19	2.57436e-16
F41G3.5	-2.12718	3.75828	3.91289	NA	NA	0.249263	2.07299e-07	1.88176e-08
try-7	-3.47709	3.93874	3.91187	NA	NA	0.103436	7.8254e-08	8.06667e-08
F16C3.4	-1.80652	3.73191	3.90578	NA	NA	0.799117	0.00102148	0.000227159
Y105C5B.18	-2.54979	3.94379	3.90509	NA	NA	0.185096	5.45887e-08	5.96959e-08
C25D7.12	-0.360126	2.98478	3.89392	NA	NA	1	0.209216	0.0302171
F21F3.2	-4.06235	3.96849	3.89278	NA	NA	0.00839275	1.91292e-11	5.71208e-11
C36H8.1	-3.44011	3.93685	3.88855	NA	NA	1.57151e-08	4.58903e-29	5.01235e-28
F37A8.1	-1.37159	4.12159	3.88788	NA	NA	0.400222	3.29949e-11	1.32414e-09
F58D2.2	-2.59836	3.96772	3.88752	NA	NA	6.32708e-06	8.6476e-29	3.47824e-27
F55C5.2	-1.61501	3.61213	3.8874	NA	NA	0.0820162	4.67294e-12	4.1936e-15
C04G2.9	-4.05406	4.00489	3.88694	NA	NA	7.23296e-22	5.32727e-43	4.80532e-40
C38C10.3	-3.48605	4.02701	3.88381	NA	NA	0.103011	2.21192e-08	9.83551e-08
chil-18	2.07889	1.4896	3.8836	NA	NA	0.61599	0.842966	0.0192357
T23F11.2	-1.96845	3.93997	3.88264	NA	NA	0.0406725	1.94506e-16	9.50624e-16
F26B1.1	-4.33153	3.9032	3.88221	NA	NA	6.19377e-06	1.07752e-18	1.8673e-18
srz-99	1.62254	3.66327	3.88184	NA	NA	0.289468	8.31868e-05	1.10623e-05
F26A1.4	-1.42495	3.75072	3.88062	NA	NA	0.629529	0.000251585	5.94777e-05
R07B7.12	2.98598	3.50765	3.87448	NA	NA	0.287813	0.0969354	0.0253578
T04A8.13	-1.27994	3.39759	3.87344	NA	NA	0.916089	0.0283204	0.00265047
T02E1.6	-4.23547	3.85556	3.87097	NA	NA	0.00867637	2.15412e-10	1.24823e-10
C50F7.3	-1.95152	3.63712	3.8686	NA	NA	0.409457	7.5236e-05	6.09437e-06
W02D7.4	-1.79015	3.7767	3.86677	NA	NA	0.309898	4.07807e-07	1.14168e-07
F26F12.2	-0.250788	3.62913	3.86433	NA	NA	0.980943	0.000742078	0.000145995
Y37E11B.10	-1.48802	3.63051	3.86251	NA	NA	0.0511875	2.08554e-16	9.85513e-20
C38C3.3	-1.29698	3.5688	3.86165	NA	NA	0.308554	7.47625e-09	2.69733e-11
Y27F2A.6	0.374456	3.79441	3.86157	NA	NA	1	0.00138104	0.000543874
W03D8.1	-0.938099	3.98153	3.86124	NA	NA	0.961133	0.000422922	0.000618648
fut-5	-0.24138	3.89515	3.86011	NA	NA	0.969384	0.000758882	0.00054415
clec-40	2.66595	3.47123	3.85832	NA	NA	0.00965045	0.00036648	1.51564e-05
F54B3.2	0.438535	3.74635	3.8559	NA	NA	1	1.8053e-05	4.33024e-06
T05C12.1	-3.17395	3.86216	3.8528	NA	NA	0.0029232	5.44916e-14	4.75302e-14
C02F5.5	-1.29852	3.87034	3.85038	NA	NA	0.241516	8.36499e-13	8.39353e-13
C32D5.4	-2.03389	3.85832	3.84764	NA	NA	0.0921861	3.65452e-11	3.1591e-11
T06G6.8	0.494012	3.19556	3.8443	NA	NA	1	0.0442712	0.00425111
D2045.5	0.237247	4.03661	3.84137	NA	NA	1	1.40925e-06	6.64465e-06
H08M01.1	-1.7123	3.72358	3.83624	NA	NA	0.384383	1.36695e-06	2.51128e-07
C34G6.3	-2.30998	3.55675	3.83456	NA	NA	0.23695	7.46782e-06	1.96222e-07
C45B11.8	0.231796	3.11537	3.83415	NA	NA	1	0.0442376	0.00312297
R10E9.2	-2.82368	3.89284	3.83392	NA	NA	9.50484e-08	4.96954e-30	8.98264e-29
T27F6.1	-1.24402	4.03438	3.83357	NA	NA	0.562388	1.04888e-06	5.40136e-06
C39H7.1	-4.44613	3.89475	3.82743	NA	NA	8.34252e-11	7.24567e-28	1.76977e-26
ssq-4	-3.62779	4.08907	3.82573	NA	NA	3.89372e-12	3.5764e-37	2.15179e-31
D1081.10	-1.91885	3.9407	3.8234	NA	NA	0.799117	0.000426326	0.000482963
Y54G2A.24	-1.33235	3.80865	3.82254	NA	NA	0.414004	9.41477e-08	4.85132e-08
C14C10.1	-2.58326	3.79719	3.81544	NA	NA	0.000962813	1.23995e-18	6.40089e-19
Y37E3.19	-1.19099	4.06772	3.81417	NA	NA	0.611618	1.92162e-07	2.14142e-06
Y116F11B.8	-2.09145	3.48962	3.81382	NA	NA	0.139663	1.78299e-06	1.5731e-08
C01G12.9	-1.1316	3.40325	3.81244	NA	NA	0.916089	0.0234202	0.00310736
ZC376.8	-3.34049	3.38595	3.80948	NA	NA	0.150352	6.60254e-05	6.40976e-07
C17H1.10	-0.279936	1.84881	3.80801	NA	NA	1	0.842658	0.0389252
B0280.17	-0.483861	3.88945	3.80424	NA	NA	0.596304	5.58228e-24	1.90068e-22
K03H1.9	-2.75723	3.47838	3.80414	NA	NA	0.462486	0.000248509	1.43256e-05
math-48	0.179087	3.48198	3.80257	NA	NA	1	0.0131159	0.00219464
F42G8.9	-3.15599	3.77899	3.79696	NA	NA	0.212568	4.36908e-06	2.3705e-06
C15H11.10	-1.32059	3.41708	3.79683	NA	NA	0.916089	0.0233399	0.00425615
B0507.10	0.0189265	2.31692	3.78612	NA	NA	1	0.000883928	4.04564e-14
Y43F8A.2	-2.44585	3.94959	3.78382	NA	NA	2.97039e-05	1.00257e-27	1.36381e-24
clec-151	-4.09146	3.63993	3.78087	NA	NA	0.000183079	9.11998e-13	1.72553e-14
ferl-1	0.0164125	3.64298	3.77816	NA	NA	1	0.000121164	2.09467e-05
R01H2.4	-1.32059	3.68032	3.77461	NA	NA	0.631345	0.000577288	0.000217605
ssp-32	-0.360126	3.94289	3.77271	NA	NA	1	0.0264839	0.0316031
H32C10.3	-1.83496	3.78305	3.77093	NA	NA	0.157112	8.24138e-10	7.31152e-10
fbxa-162	0.915127	2.95052	3.77076	NA	NA	0.462486	3.63554e-05	4.53601e-10
ZK930.7	-1.21727	3.64359	3.77072	NA	NA	0.357055	4.95761e-09	3.91064e-10
scl-12	2.57449	3.02851	3.77015	NA	NA	0.353653	0.137759	0.0298132
Y116A8C.23	-3.47738	3.6834	3.76883	NA	NA	0.0692839	4.21044e-07	9.09478e-08
Y4C6A.3	-1.978	3.80067	3.76822	NA	NA	0.408587	1.13886e-05	9.88191e-06
W08E3.4	-0.482911	3.90166	3.76509	NA	NA	0.768337	1.42043e-06	4.07891e-06
ftn-1	1.43622	3.29947	3.76224	NA	NA	2.61472e-05	4.70787e-27	6.93954e-36
D1054.11	-2.16015	5.14344	3.75877	NA	NA	0.799117	4.26845e-10	0.00020742
W04E12.5	-1.30041	4.17614	3.75859	NA	NA	0.631976	1.73649e-05	0.000212911
T22B3.2	-1.87282	3.8262	3.75375	NA	NA	9.32268e-06	2.91527e-35	2.18618e-33
C08F8.6	-2.64686	3.37753	3.75277	NA	NA	0.019375	1.36501e-08	8.21424e-12
F07F6.1	-3.74561	3.82441	3.75214	NA	NA	1.03675e-06	4.90741e-21	6.28759e-20
C56C10.6	0.157434	3.51644	3.74827	NA	NA	1	0.000150173	1.5881e-05
T01C3.5	-2.56733	3.69829	3.74483	NA	NA	0.184236	9.11073e-07	3.8382e-07
Y39G10AR.16	-2.51261	3.69825	3.74457	NA	NA	0.184236	1.00181e-06	3.63738e-07
F01D5.7	-0.43073	2.87233	3.74319	NA	NA	0.770975	0.000571578	4.51226e-08
C04F12.7	-2.36855	3.91571	3.735	NA	NA	4.73462e-06	2.39521e-31	1.21907e-27
spp-11	1.07556	3.72837	3.73353	NA	NA	0.946447	0.0264752	0.0299377
F22E5.6	1.47679	2.44209	3.73195	NA	NA	0.770975	0.21584	0.00705516
Y48B6A.5	-2.36868	3.83328	3.72838	NA	NA	0.000688098	2.73898e-21	1.16178e-19
T28B8.6	-1.82127	3.78737	3.72727	NA	NA	0.407222	1.61065e-05	1.90921e-05
D2062.6	-2.63448	3.67784	3.72503	NA	NA	0.463644	0.000176781	7.65722e-05
T16A9.5	-1.2147	3.83032	3.72455	NA	NA	0.017091	5.1644e-31	1.0641e-28
T10E9.6	-2.47166	3.48805	3.72444	NA	NA	0.5796	0.000564013	0.000112207
C32E8.4	-2.28661	3.83812	3.72177	NA	NA	0.0892865	2.76676e-10	1.54714e-09
ZK795.2	-2.50381	3.57873	3.71955	NA	NA	0.18475	4.87236e-06	5.77153e-07
Y69A2AR.12	1.76101	3.47727	3.71639	NA	NA	0.00612804	2.70675e-11	7.3918e-14
F21F3.3	-1.75551	2.92781	3.71536	NA	NA	0.00977154	3.73232e-10	4.91128e-20
Y51H7C.9	-0.974669	3.84252	3.71442	NA	NA	0.562912	6.59932e-07	1.61818e-06
D1086.17	-3.95077	3.78043	3.71158	NA	NA	0.00017743	2.50261e-14	1.08355e-13
fbxb-36	-3.32572	3.37168	3.70881	NA	NA	0.207388	7.82058e-05	2.63207e-06
Y106G6H.13	-2.38807	3.71788	3.70852	NA	NA	0.00134295	1.59223e-18	1.83301e-18
msp-36	-4.80879	4.01903	3.70812	NA	NA	9.1788e-08	5.53243e-24	5.86722e-19
W03D8.9	-2.61595	3.75597	3.7072	NA	NA	7.69946e-08	7.21624e-30	9.16118e-29
Y43F8C.5	-2.28304	3.77803	3.70376	NA	NA	0.00893943	1.15144e-15	8.38733e-15
T16A1.2	-2.16748	3.87344	3.70133	NA	NA	0.32348	1.27054e-06	5.92715e-06
C45B11.5	-0.453585	3.49452	3.69758	NA	NA	1	0.0969354	0.0389837
T02E1.7	-3.44856	3.54017	3.69542	NA	NA	2.44496e-05	1.20642e-14	9.49644e-17
C43G2.3	-0.308369	3.83169	3.69475	NA	NA	0.991192	4.54842e-05	8.78291e-05
C23H4.6	1.31325	2.95108	3.69399	NA	NA	0.461719	0.00367821	1.36923e-05
Y39B6A.18	-1.26957	3.11158	3.69234	NA	NA	0.561505	0.00150557	1.27106e-05
tag-76	-3.82266	3.77259	3.6913	NA	NA	4.44151e-20	6.2914e-38	1.00589e-35
M110.7	-2.46669	4.05092	3.68935	NA	NA	0.183695	8.43443e-09	6.18789e-07
T05F1.5	-4.35259	3.77009	3.6879	NA	NA	2.11736e-05	4.93376e-16	4.67026e-15
Y18H1A.10	-1.19898	3.85623	3.68708	NA	NA	0.4109	3.53919e-08	2.65212e-07
ssp-31	-2.65051	4.17171	3.68389	NA	NA	0.133487	4.49026e-10	3.6976e-07
Y119C1B.1	-1.06198	3.57402	3.67563	NA	NA	0.394109	1.13144e-08	1.2246e-09
F26D2.10	-3.63335	3.55326	3.67352	NA	NA	0.00337666	1.28091e-09	9.22602e-11
Y6B3B.3	-1.17114	4.03603	3.67293	NA	NA	0.916089	0.00189682	0.00514784
ZC477.7	-3.57145	3.6853	3.66987	NA	NA	0.00507787	1.81426e-10	1.5275e-10
Y51B9A.5	-1.96482	3.28814	3.66829	NA	NA	0.408931	0.00071639	3.39756e-05
C15H7.3	-4.16613	3.24566	3.66742	NA	NA	0.00529692	9.03924e-07	8.8216e-10
T05A7.6	-3.23533	3.68495	3.66668	NA	NA	3.18293e-07	1.04405e-22	2.08163e-22
C17D12.5	-2.74397	3.64058	3.6647	NA	NA	0.463644	0.000172656	0.000111244
K08A2.2	-0.393332	3.69046	3.66287	NA	NA	0.764537	6.57174e-09	6.65647e-09
ZK673.6	-2.33057	3.38266	3.66038	NA	NA	0.241869	7.40348e-05	3.73623e-06
C27B7.6	-2.37924	3.59391	3.65962	NA	NA	0.239202	6.04868e-06	2.20441e-06
T02H6.7	-2.34049	3.96244	3.65959	NA	NA	0.579951	6.08337e-05	0.000357858
R10E4.7	-1.76458	3.47548	3.6578	NA	NA	0.0998751	7.1002e-10	1.38027e-11
F26A3.5	-3.291	4.04697	3.65774	NA	NA	0.00116565	6.03883e-17	1.45182e-12
C14A6.13	-2.04744	3.35319	3.65119	NA	NA	0.32348	0.000195825	1.07094e-05
T08G11.2	-2.07008	3.68169	3.64989	NA	NA	0.148293	3.12278e-08	2.82861e-08
F36D3.4	-3.41052	3.58909	3.64976	NA	NA	0.00510524	1.35765e-09	3.28315e-10
F36F12.7	-1.11142	4.02824	3.64957	NA	NA	0.62881	6.32682e-05	0.000535994
R07E5.6	-0.618626	3.59233	3.64837	NA	NA	0.634826	7.55607e-08	2.11147e-08
hdl-1	-1.58707	3.78869	3.64002	NA	NA	0.288614	5.38349e-09	3.28202e-08
F28A10.9	0.639874	4.14809	3.63897	NA	NA	1	0.0199722	0.0487871
F36D3.5	-1.6785	3.54126	3.6389	NA	NA	0.15273	2.41553e-09	2.59892e-10
C14A4.13	-0.290232	3.48864	3.63809	NA	NA	0.907474	1.31064e-08	6.45426e-10
F36A4.2	-3.15151	4.16789	3.63646	NA	NA	0.149351	8.54679e-09	4.02284e-06
F58A6.5	-2.58892	3.64328	3.63301	NA	NA	0.00556441	1.30637e-12	1.36884e-12
R08C7.5	-3.78713	3.52404	3.63156	NA	NA	0.0014231	4.14409e-10	3.70622e-11
Y38H8A.4	-2.48928	3.69612	3.63146	NA	NA	0.0397998	1.67601e-10	3.90195e-10
H12I13.1	0.00569786	3.7335	3.62703	NA	NA	1	0.000292969	0.000377452
fbxa-136	3.95784	3.34244	3.62487	NA	NA	7.23721e-06	0.00399632	0.000818111
F41D3.6	1.43373	3.07432	3.62222	NA	NA	0.946441	0.209216	0.0605404
fbxa-127	1.25226	3.62401	3.61679	NA	NA	0.361018	2.93889e-06	2.48508e-06
fbxa-144	1.65487	2.50281	3.61489	NA	NA	0.427242	0.0864207	0.000671474
Y38C1AA.7	-3.53307	3.73677	3.61399	NA	NA	1.48958e-17	2.98842e-36	2.93001e-33
C33H5.2	3.05826	5.70532	3.61192	NA	NA	0.036375	6.06662e-10	0.00694811
ZK177.3	1.43726	3.07757	3.60731	NA	NA	0.770975	0.0530014	0.00856368
F22D3.4	-0.212249	3.29585	3.60658	NA	NA	0.991192	0.00151964	0.000144526
BE10.1	-2.61545	3.56993	3.60635	NA	NA	0.000952067	1.69406e-14	4.50023e-15
ZK945.7	-2.04067	3.69063	3.60468	NA	NA	0.00643656	3.15805e-18	5.2132e-17
F37C4.7	-0.171141	3.49452	3.6039	NA	NA	1	0.0969354	0.0488548
C04G2.5	-3.89158	3.33154	3.6028	NA	NA	0.0469635	1.07472e-05	3.26361e-07
F56F3.4	-0.77495	3.34619	3.60264	NA	NA	0.470506	1.37303e-09	4.74389e-12
C25A8.4	-2.47738	4.57722	3.60238	NA	NA	0.463366	1.59775e-08	0.000148294
F10D11.3	-3.35986	3.62063	3.60193	NA	NA	0.149351	6.02578e-06	5.13485e-06
F10G8.2	-0.0484295	3.44166	3.59947	NA	NA	1	8.94528e-05	1.52354e-05
C25G4.8	-3.47738	3.68281	3.59942	NA	NA	0.0692839	4.63733e-07	8.67634e-07
M05B5.1	-2.22899	3.60527	3.59916	NA	NA	0.0879923	1.00987e-08	7.76315e-09
C04E6.5	-2.3746	3.62743	3.59715	NA	NA	0.0774585	3.6256e-08	4.00066e-08
abt-5	-1.41835	3.72172	3.595	NA	NA	0.0862728	6.65331e-17	2.11911e-15
Y116A8C.4	-3.7887	3.5265	3.59454	NA	NA	3.53496e-05	1.82733e-13	2.31348e-14
B0207.7	-3.49315	3.55775	3.5943	NA	NA	0.000369248	2.19078e-12	7.01209e-13
K09G1.2	-4.03025	3.28449	3.58962	NA	NA	0.020268	4.61861e-06	7.26397e-08
M28.4	-1.02554	3.30701	3.58845	NA	NA	0.562253	0.000102771	4.62513e-06
Y47G6A.3	-1.14274	3.2804	3.58745	NA	NA	0.656805	0.00102068	9.90348e-05
T03F6.8	-3.41405	3.6621	3.58583	NA	NA	0.152249	5.46031e-06	8.79241e-06
ZK507.1	-1.55293	3.79974	3.58532	NA	NA	0.499423	5.77989e-05	0.000206209
nas-3	1.44154	1.75738	3.58494	x	x	7.43104e-05	1.79442e-05	1.77003e-30
Y69A2AR.19	-3.29946	3.76607	3.58459	NA	NA	2.95648e-10	1.57164e-29	7.07197e-26
T07D3.6	1.41033	2.88691	3.58381	NA	NA	0.77287	0.0637523	0.00597963
B0205.14	0.502412	0.706408	3.58154	NA	NA	0.831404	0.742885	3.98013e-07
F01D4.3	-1.56737	3.29164	3.57916	NA	NA	0.45748	0.000218648	1.37002e-05
kel-10	-2.38279	3.64702	3.57865	NA	NA	6.71165e-07	3.67965e-27	8.57705e-26
rpl-42	-2.65051	3.1635	3.57788	NA	NA	0.463644	0.00340777	0.000183402
F37C12.18	-3.96716	3.61733	3.57513	NA	NA	0.0128273	2.00451e-08	2.81104e-08
Y47H9B.2	-2.17963	3.21211	3.57375	NA	NA	0.32531	0.000633336	2.67211e-05
ccch-5	1.88349	3.01333	3.57011	NA	NA	0.848155	0.137694	0.0386665
D1081.12	-2.407	3.72925	3.56814	NA	NA	0.0512553	1.33682e-10	2.00242e-09
rpl-19	2.92982	1.31616	3.56374	NA	NA	3.12155e-15	0.0526186	1.30028e-19
Y4C6A.1	-3.47738	3.7776	3.56245	NA	NA	0.0692839	1.15117e-07	1.17559e-06
F46A9.2	-2.98323	3.13991	3.55994	NA	NA	0.28751	0.0011681	4.34056e-05
ZK550.5	-2.58784	3.18643	3.55987	NA	NA	2.51383e-05	1.07017e-14	4.71993e-20
F29D10.1	0.225158	3.17738	3.55738	NA	NA	1	0.0170338	0.00205708
C08E3.13	1.33195	2.36644	3.55154	NA	NA	0.0369507	4.08193e-05	5.33874e-15
C28C12.1	0.613185	2.84591	3.54933	NA	NA	0.919404	0.0175701	0.000363232
Y32G9A.11	0.737459	2.99981	3.54831	NA	NA	0.982075	0.0247031	0.0020377
srw-89	0.774729	3.32318	3.54646	NA	NA	1	0.137694	0.0754331
ZK546.4	-0.79043	3.51793	3.54626	NA	NA	0.571567	1.29776e-08	6.60251e-09
ZK1053.2	-2.43036	3.58737	3.54517	NA	NA	0.000826178	3.67616e-16	1.13517e-15
srr-8	1.00552	1.02484	3.54296	x	x	0.976524	0.974282	0.0124567
C29F9.5	1.02315	2.8055	3.54105	NA	NA	0.976524	0.11288	0.0122896
clec-119	-0.278189	3.21685	3.53896	NA	NA	0.770975	2.78753e-14	8.77072e-19
C01G12.8	-3.1764	3.70906	3.53867	NA	NA	2.50995e-11	8.00344e-31	2.38206e-27
ZK616.8	-3.30764	3.5825	3.53658	NA	NA	0.0169678	1.41395e-08	1.96831e-08
cyp-13A5	0.4405	1.98743	3.5307	NA	NA	0.617555	0.000127926	1.5402e-20
gsp-4	-3.96198	3.66198	3.52936	NA	NA	3.66406e-10	3.98071e-24	9.09608e-22
W09D6.4	-3.62346	3.51783	3.52861	NA	NA	0.0455974	1.08763e-06	7.5267e-07
F13E9.5	-2.80597	3.40122	3.52733	NA	NA	0.463366	0.000613778	0.000145909
Y57G7A.6	-2.13427	3.43174	3.52702	NA	NA	0.00617979	2.9826e-13	1.53398e-14
fbxa-158	1.51909	3.127	3.52677	NA	NA	0.015142	1.58053e-09	2.1753e-13
rnh-1.1	-3.73375	3.48425	3.52513	NA	NA	0.00143381	9.77856e-10	3.28315e-10
T23G11.10	0.378842	3.90475	3.5244	NA	NA	1	0.0200355	0.031629
F25H5.7	-1.53466	3.16426	3.52368	NA	NA	0.458381	0.000632713	3.32848e-05
T12A7.7	1.79064	2.38523	3.52336	NA	NA	0.764641	0.414477	0.0388363
W02B12.12	-2.96133	3.49384	3.52182	NA	NA	2.90271e-10	3.96269e-26	1.69045e-26
B0207.11	-2.7561	3.11534	3.52074	NA	NA	0.287813	0.00193276	7.62378e-05
F15D3.4	-1.91876	3.76635	3.51138	NA	NA	0.0621392	2.36481e-12	3.21058e-10
F56B3.6	-1.99032	3.64321	3.50905	NA	NA	0.0184844	1.17576e-14	3.1236e-13
C53B4.2	-1.94509	3.11534	3.50877	NA	NA	0.799117	0.0200746	0.00181679
col-129	-1.98778	3.96132	3.50732	NA	NA	1.2218e-07	3.14081e-42	2.32953e-32
Y37D8A.8	-0.324403	3.01057	3.50601	NA	NA	0.991192	0.00672357	0.0003439
nhr-266	0.0850701	3.64254	3.5055	NA	NA	1	0.00199411	0.00280753
R08C7.8	-2.23452	3.40976	3.5051	NA	NA	0.14019	3.64358e-06	7.5267e-07
col-139	-2.4149	3.93133	3.50467	NA	NA	1.43017e-09	7.66171e-40	1.52695e-30
F58D5.8	-1.53872	3.53495	3.50316	NA	NA	0.495795	0.000195523	0.000206134
W06H8.4	-2.15151	3.24545	3.50009	NA	NA	0.579951	0.00463108	0.000797543
F55F8.7	-2.34176	3.24672	3.49979	NA	NA	0.0179362	4.87087e-08	3.94579e-10
Y40H7A.11	1.98598	2.22854	3.49952	NA	NA	0.427242	0.309862	0.0124567
C06A8.6	-3.79896	3.49093	3.49869	NA	NA	9.65786e-10	7.037e-21	5.89096e-21
C03C11.1	-2.09294	3.34252	3.49831	NA	NA	0.0609242	2.10928e-08	1.08308e-09
C52E4.7	-2.54842	3.58252	3.49635	NA	NA	0.00986658	1.40945e-10	5.32113e-10
K06H7.8	-2.44534	3.61808	3.49585	NA	NA	0.0400694	1.15296e-09	6.61699e-09
Y57G11C.52	-0.270492	3.7963	3.4936	NA	NA	0.969384	0.00138089	0.0037495
Y54E2A.7	-2.60461	3.72543	3.49289	NA	NA	0.0588382	6.57174e-09	1.22766e-07
F09C12.8	-1.25389	3.57444	3.4921	NA	NA	0.119194	1.00764e-15	9.40033e-15
T28C6.5	-4.35378	3.50331	3.48827	NA	NA	0.00209556	3.26919e-09	3.26968e-09
K09C6.8	-3.17088	3.60057	3.48655	NA	NA	0.148129	7.49491e-06	1.31232e-05
R102.3	-3.14785	3.59757	3.4864	NA	NA	0.0516939	5.73766e-08	1.93333e-07
C32E12.1	-0.852976	3.08168	3.48515	NA	NA	0.602002	0.0003784	5.63767e-06
T04F3.3	-1.27981	3.6923	3.48425	NA	NA	0.241719	4.31844e-11	1.71763e-09
F16G10.11	0.0828179	2.60907	3.48395	NA	NA	1	0.137054	0.0101254
oac-50	-0.838054	3.36034	3.48172	NA	NA	0.492007	2.04274e-07	2.54928e-08
Y69E1A.2	-3.02074	3.57341	3.48151	NA	NA	5.97708e-12	6.56736e-30	6.37459e-28
wht-5	-4.12263	3.56072	3.48109	NA	NA	2.83531e-07	5.91768e-17	5.92347e-16
F14E5.3	-1.26202	3.82083	3.48031	NA	NA	0.628117	0.000152298	0.000927624
T13F2.12	-1.36013	3.41891	3.47998	NA	NA	0.916089	0.0193195	0.012515
gcy-13	1.65054	3.41249	3.47825	NA	NA	0.856906	0.15255	0.0958655
C25A8.5	-2.31629	3.65022	3.47818	NA	NA	0.0312045	6.97154e-11	1.24736e-09
C33F10.12	-1.92526	3.56617	3.4779	NA	NA	0.00373764	1.67108e-17	2.66122e-16
T04B2.7	1.69844	3.1512	3.47542	NA	NA	0.500746	0.0170222	0.00277221
C01G12.13	-1.8475	2.6389	3.47537	NA	NA	0.405511	0.0156474	9.80478e-05
acdh-8	-3.4567	3.7179	3.47423	NA	NA	9.45785e-09	8.64031e-25	1.64836e-20
csp-1	0.563442	2.58831	3.47382	NA	NA	0.936544	0.0313227	0.000257956
ZC317.6	-2.08896	3.95968	3.47232	NA	NA	0.799117	0.000236895	0.0020576
col-81	-1.89863	4.16703	3.47184	NA	NA	3.2895e-05	7.66171e-40	3.69699e-25
F08F8.6	-1.09603	3.10556	3.47118	NA	NA	0.528793	0.000174103	4.55238e-06
R155.2	-2.08543	3.49526	3.47071	NA	NA	0.000108193	7.57716e-22	2.05984e-21
F56A11.6	-3.06809	3.52014	3.46655	NA	NA	3.23784e-06	1.39989e-18	8.12275e-18
F58G1.3	-2.64072	3.38771	3.46627	NA	NA	8.01832e-06	1.26666e-17	8.34881e-19
Y7A5A.6	0.667465	2.8157	3.46444	NA	NA	1	0.112796	0.0125817
F36G9.13	-2.93266	3.52743	3.46333	NA	NA	0.0516939	2.28988e-07	3.70285e-07
K11C4.1	-1.72318	3.41625	3.45553	NA	NA	0.0455974	6.67284e-12	1.85567e-12
Y82E9BR.11	0.674092	2.81646	3.45442	NA	NA	1	0.137133	0.0182615
ZK858.8	-2.06587	3.18844	3.44988	NA	NA	0.0919577	1.52327e-06	2.71887e-08
R10E4.3	-2.77551	2.90961	3.4482	NA	NA	0.463441	0.0100461	0.000338946
Y69E1A.8	-3.26783	3.61139	3.44455	NA	NA	0.00293427	2.23255e-11	4.43021e-10
C47E12.10	-2.72987	2.99701	3.44445	NA	NA	0.289256	0.00416186	0.000195284
C35D10.3	-2.15151	3.07131	3.44311	NA	NA	0.579951	0.00854752	0.0010525
C04G2.2	-3.60794	3.45983	3.44268	NA	NA	0.0032349	4.22131e-09	4.0236e-09
Y41C4A.1	-2.93203	3.13255	3.44251	NA	NA	0.289468	0.00151393	0.000154536
C38C3.7	-2.32614	3.20162	3.44248	NA	NA	0.102862	1.08175e-05	4.2025e-07
C09B9.4	-1.80046	3.60811	3.44119	NA	NA	0.0154205	7.47565e-16	6.77003e-14
Y116F11B.7	-3.33214	3.53167	3.44076	NA	NA	0.100578	6.68979e-06	1.01655e-05
C15H7.4	-3.19025	3.01262	3.43904	NA	NA	0.146945	0.000862786	1.84608e-05
W01B6.2	-2.77599	3.48716	3.43887	NA	NA	0.000207026	6.65003e-15	2.17173e-14
tag-344	-1.80341	3.61597	3.4382	NA	NA	0.10288	1.5176e-10	2.84091e-09
F53B6.4	-2.10043	3.53514	3.43641	NA	NA	0.000114998	1.49219e-21	5.81903e-20
Y75B8A.23	-1.06116	3.49583	3.43609	NA	NA	0.528849	5.70533e-06	7.76502e-06
F40B5.3	-0.626473	3.4561	3.43511	NA	NA	0.913912	0.000167314	0.00013694
sst-20	-2.47678	3.20715	3.43434	NA	NA	0.000959382	3.41103e-11	8.62329e-14
srt-63	-0.575186	-0.831479	3.43238	NA	NA	1	1	0.0487446
F32B4.2	-3.89947	3.43571	3.42625	NA	NA	3.56928e-07	7.66985e-16	8.54901e-16
Y37D8A.5	-2.69541	2.62714	3.4262	NA	NA	7.42752e-06	5.71212e-09	1.24054e-18
F46A9.1	-2.69688	2.72639	3.42527	NA	NA	0.000203503	1.20965e-07	1.44723e-14
K06A5.3	-1.59332	3.20579	3.42413	NA	NA	0.457977	0.000497365	6.4032e-05
fbxa-111	2.5792	2.03546	3.42321	NA	NA	0.353653	0.479195	0.0487523
Y67A6A.1	-2.84105	2.92775	3.4225	NA	NA	0.00260583	1.02543e-06	1.78351e-10
R08A2.2	-4.08812	3.48485	3.41994	NA	NA	0.00807549	4.78019e-08	8.19997e-08
F49C12.4	1.67414	5.02957	3.41853	NA	NA	0.289468	1.01498e-11	0.000474602
F40G12.10	-2.44019	3.10368	3.41844	NA	NA	0.000237625	1.17632e-11	1.67448e-15
W01C9.4	-1.09182	3.42656	3.41793	NA	NA	0.397189	1.08876e-08	9.73033e-09
K07H8.5	-0.966404	3.34268	3.41789	NA	NA	0.525749	3.07516e-07	7.00335e-08
M117.4	-1.78726	3.52609	3.41605	NA	NA	0.152057	1.86234e-08	5.75991e-08
R07E5.15	-2.96654	3.45328	3.41489	NA	NA	1.32508e-05	9.34305e-17	2.84657e-16
Y57G7A.5	-1.74192	3.39901	3.41346	NA	NA	0.122216	7.07971e-08	3.69012e-08
F38H4.6	-1.8601	3.59686	3.41301	NA	NA	0.404971	5.73518e-05	0.00015116
M70.3	-2.12477	3.6452	3.40955	NA	NA	0.00229054	1.14053e-17	1.24039e-14
F49E11.7	-2.69716	3.43121	3.40638	NA	NA	0.463366	0.000540509	0.000446228
Y38E10A.17	-2.3011	3.48139	3.40517	NA	NA	4.79886e-06	7.02846e-24	1.6169e-22
spe-17	-2.51649	3.6729	3.40446	NA	NA	0.0424044	5.65837e-09	2.16638e-07
kin-5	-2.60722	3.36412	3.39955	NA	NA	0.005527	4.00201e-10	1.43114e-10
Y41E3.18	-2.47738	3.56553	3.39939	NA	NA	0.463366	0.000250428	0.000501252
H34I24.1	-0.18967	3.3187	3.39695	NA	NA	0.910194	2.95334e-05	1.03786e-05
B0207.1	-3.94467	3.17043	3.39654	NA	NA	0.0131494	9.73658e-06	4.24077e-07
ZC395.4	-1.71234	3.02017	3.39608	NA	NA	0.500433	0.00587759	0.000562556
C01G12.3	-1.41819	3.34677	3.39484	NA	NA	0.265757	2.58333e-07	8.19997e-08
F32A11.3	-2.51174	3.58155	3.39475	NA	NA	6.99307e-13	3.94488e-35	7.27628e-31
F36H12.14	-1.9994	3.15504	3.39468	NA	NA	0.0596277	3.07583e-07	4.94226e-09
F37A4.4	-1.72523	3.27141	3.3892	NA	NA	0.0158963	1.15239e-12	3.16037e-14
E02H9.1	1.47443	2.55295	3.38697	NA	NA	0.857652	0.3252	0.0603891
sdz-3	0.181087	3.08694	3.38496	NA	NA	1	0.00127639	0.000111572
F07C4.12	3.43188	2.29722	3.38427	NA	NA	0.00137241	0.167388	0.00429561
F36H12.5	-0.665318	3.08828	3.38049	NA	NA	0.768402	0.00834034	0.00120818
ZK892.4	0.688004	3.3095	3.38	NA	NA	0.982053	0.00893278	0.00599161
snf-5	-1.11518	3.38904	3.37271	NA	NA	0.0256805	4.92639e-24	1.11234e-23
C24D10.1	-1.73883	3.01591	3.3717	NA	NA	0.195743	4.44568e-05	5.45126e-07
F20D6.6	-0.309712	3.07095	3.37049	NA	NA	0.884587	9.72973e-06	1.69234e-07
F13A7.1	-3.17166	3.44188	3.37004	NA	NA	1.15931e-07	1.62102e-19	1.92409e-18
R07C12.1	1.88184	2.57739	3.3695	NA	NA	0.000875377	2.53696e-05	9.93495e-11
T25B9.5	-1.27519	3.43501	3.36904	NA	NA	0.413645	8.63795e-06	1.15643e-05
C09D4.3	-2.24074	3.42195	3.36842	NA	NA	1.55771e-05	1.71112e-20	1.2692e-19
ZK1290.7	-1.30041	3.35893	3.36796	NA	NA	0.631976	0.00302382	0.00242071
C12D8.9	-2.34049	3.56615	3.36717	NA	NA	0.579951	0.000849113	0.00183638
AH10.1	-3.67025	3.47625	3.36659	NA	NA	9.67232e-10	5.64135e-21	3.9476e-19
W02A2.8	-0.875153	3.37173	3.36477	NA	NA	0.513832	3.91045e-08	3.10384e-08
B0462.1	2.02782	3.36363	3.35974	NA	NA	0.272239	0.00472002	0.00435768
ZK1225.4	-3.81463	3.41321	3.35948	NA	NA	0.00043019	7.90263e-10	1.28705e-09
C08F11.11	-2.85535	3.8693	3.35723	NA	NA	1.58897e-05	5.68121e-24	5.19203e-16
F54H12.7	-1.59691	2.97973	3.35663	NA	NA	0.14565	1.18689e-06	2.78698e-09
T21G5.4	-0.563324	3.57607	3.35057	NA	NA	0.497796	1.7178e-18	2.24973e-15
T11F8.4	-3.03916	3.11883	3.34712	NA	NA	0.00133703	2.82016e-08	2.96719e-10
F27C8.5	-3.00486	3.3638	3.34544	NA	NA	9.66267e-06	7.47565e-16	1.20218e-15
T26F2.3	1.42694	3.28561	3.34491	NA	NA	0.0110191	8.68191e-13	2.12726e-13
nep-13	-2.78262	3.39608	3.34439	NA	NA	0.00508223	1.09343e-09	1.92967e-09
F36D1.6	-1.01231	3.14855	3.34382	NA	NA	0.703964	0.00151338	0.000394442
F40F12.3	-3.46419	3.18239	3.34297	NA	NA	0.000367531	5.30763e-09	1.79965e-10
T06C10.3	-2.95215	3.07487	3.34238	NA	NA	0.00047871	4.86064e-09	1.53319e-11
C16C8.18	-2.8965	3.36571	3.33949	NA	NA	0.000109172	4.02479e-14	6.67946e-14
clec-175	-1.75849	3.84407	3.33815	NA	NA	0.499094	2.15054e-05	0.000505273
Y69A2AR.14	-4.14502	3.14618	3.33804	NA	NA	0.0131494	1.06503e-05	7.89013e-07
H06I04.5	-3.12517	3.37664	3.33746	NA	NA	0.000184987	2.64361e-12	4.62614e-12
F48G7.10	0.658708	1.92223	3.33422	NA	NA	0.551229	0.00872205	1.28303e-10
wht-9	-1.7561	3.42436	3.33368	NA	NA	0.799117	0.00471074	0.0051893
fbxa-183	-1.27188	2.90181	3.33269	NA	NA	0.562722	0.0053756	0.000282413
C33C12.7	0.180793	3.0076	3.33004	NA	NA	1	0.000968329	5.87897e-05
C17G10.3	-2.97143	3.50509	3.32992	NA	NA	0.0710274	5.94819e-07	3.65535e-06
C50F7.5	1.19027	1.2234	3.32921	NA	NA	8.63762e-05	0.000842718	5.97513e-32
B0496.6	0.045935	3.10931	3.32876	NA	NA	1	0.0016969	0.000274488
M01G12.7	-0.481073	3.91735	3.32685	NA	NA	1	0.00226022	0.0151402
gsp-3	-3.62785	3.45925	3.32185	NA	NA	6.4577e-14	1.26454e-26	6.35916e-24
C18H7.4	-1.96029	3.38943	3.32171	NA	NA	0.0378959	1.45448e-09	3.78655e-09
R105.1	-0.860684	3.59012	3.31917	NA	NA	0.283497	1.13014e-16	2.45808e-13
cyp-33C6	1.18905	1.67913	3.31899	NA	NA	0.513114	0.244111	0.000305144
glucose-1-dehydrogenase	2.185	1.81612	3.31716	NA	NA	0.148293	0.31639	0.0023705
ZK1010.5	-2.72599	3.26786	3.31395	NA	NA	1.03675e-06	1.93921e-17	3.50264e-18
clp-3	-1.43642	3.38982	3.31339	NA	NA	0.310733	1.11024e-07	2.05281e-07
ZK512.8	-2.19033	3.37411	3.31219	NA	NA	0.00768563	3.9783e-12	1.29749e-11
C02B10.6	-1.70314	3.30619	3.31218	NA	NA	0.799117	0.010467	0.00712035
snf-2	-3.51608	3.58171	3.31197	NA	NA	0.000583702	4.0701e-12	8.14932e-10
wht-4	-4.41063	3.54525	3.30864	NA	NA	2.65318e-06	1.7112e-14	6.56062e-12
Y66D12A.11	-0.596599	3.38275	3.30533	NA	NA	0.595809	1.13757e-08	2.99873e-08
K08D10.5	-0.182351	2.96056	3.30497	NA	NA	1	0.0936237	0.0267293
F19H8.5	1.60877	2.40141	3.30439	NA	NA	0.0840103	0.00501887	1.54765e-06
ZK622.1	-0.258681	3.22488	3.2996	NA	NA	0.972009	9.97271e-06	3.31615e-06
W09C3.8	-1.41405	3.15899	3.29623	NA	NA	0.632578	0.00833263	0.0027806
C04E6.4	-2.33485	3.02583	3.29504	NA	NA	0.0777631	6.20215e-05	2.32985e-06
T08B6.4	-2.82976	3.38972	3.29426	NA	NA	7.85965e-10	1.9683e-24	1.30949e-22
str-124	0.577958	2.02846	3.29295	NA	NA	1	0.374481	0.018009
Y4C6A.4	-3.01231	3.0878	3.29222	NA	NA	0.358478	0.00221138	0.000508551
F36D3.8	-3.06205	3.4565	3.29152	NA	NA	0.00258303	6.73908e-11	1.14953e-09
T03F6.6	-1.37308	3.32697	3.29084	NA	NA	0.0288828	3.04056e-16	8.77819e-16
dynein	1.47178	1.44275	3.2881	NA	NA	0.484921	0.512101	0.00247679
R06B10.2	-0.519949	2.91996	3.28507	NA	NA	0.672868	1.10138e-06	1.88572e-09
F31E8.5	-3.25644	3.56121	3.28299	NA	NA	0.000483248	2.81691e-13	1.30827e-10
T22C1.8	-1.72382	3.09128	3.28259	NA	NA	0.0187913	5.30235e-10	5.06038e-12
F37A8.2	-3.06206	3.52401	3.28187	NA	NA	0.016651	4.03227e-08	6.68639e-07
Y37F4.1	0.0296636	2.98513	3.28149	NA	NA	1	0.000278775	1.39202e-05
F46A8.6	-1.41405	2.99161	3.27277	NA	NA	0.916089	0.0778896	0.0266646
F21H7.12	2.88458	2.06654	3.27028	NA	NA	0.353653	0.729986	0.135528
F36A2.11	-2.9514	3.27816	3.26862	NA	NA	0.0705074	6.73896e-06	4.83017e-06
T05A7.3	1.6451	2.96766	3.26586	NA	NA	0.856906	0.209202	0.108456
scrm-5	-1.48777	3.32289	3.26461	NA	NA	0.138921	1.41835e-09	2.69469e-09
H37A05.4	1.45564	3.31719	3.25965	NA	NA	0.326721	0.000238194	0.000271199
R02F2.6	0.684635	3.04681	3.25675	NA	NA	1	0.0637776	0.026738
K08C9.2	-2.55058	3.16493	3.25565	NA	NA	3.55897e-07	5.21771e-18	2.23017e-19
ZC190.7	-1.83746	3.37512	3.25367	NA	NA	0.408931	0.000438823	0.00065441
F36A2.12	-2.20096	3.11042	3.24867	NA	NA	0.0197227	1.24921e-07	9.99872e-09
C18E9.8	-3.80808	3.41384	3.24817	NA	NA	2.04685e-07	1.30104e-16	1.81793e-14
C14C11.1	-2.80652	3.34354	3.24768	NA	NA	0.284765	0.000306535	0.000354026
F54F12.1	-2.00261	3.22982	3.24761	NA	NA	0.00457294	5.07351e-12	2.33325e-12
F14H8.8	-2.51043	2.57214	3.24726	NA	NA	0.579951	0.0461389	0.00209906
C18A3.7	-3.66637	2.93096	3.24667	NA	NA	0.0700106	0.000617592	3.48471e-05
F58D5.7	-3.03563	3.40793	3.24642	NA	NA	7.68371e-06	1.27658e-15	1.02538e-13
H23L24.2	-2.80531	3.04381	3.24626	NA	NA	0.0988717	0.000151709	1.56937e-05
F57B9.3	2.06687	2.74053	3.24575	NA	NA	0.00383549	0.000269652	1.17734e-06
K09D9.1	0.9443	2.59141	3.24515	NA	NA	0.127572	2.48962e-08	3.55598e-15
tsp-19	-1.26375	3.13927	3.244	NA	NA	0.30695	2.37887e-06	4.39664e-07
dod-23	-0.82283	3.14814	3.23827	NA	NA	0.627786	0.000102953	2.84301e-05
cyp-37B1	0.795072	1.87886	3.23697	NA	NA	0.299963	0.00224358	6.09139e-13
fbxb-38	2.26768	2.9754	3.23666	NA	NA	0.0691746	0.00512699	0.00120818
scl-24	-2.60134	0.584157	3.23331	NA	NA	0.182798	0.844671	5.7383e-05
C18H2.4	-1.32457	2.8215	3.2313	NA	NA	0.517402	0.00273793	9.40183e-05
fipr-24	1.6521	2.35915	3.23003	NA	NA	0.375396	0.105935	0.004206
Y65B4A.9	-1.51286	3.1757	3.22889	NA	NA	0.179421	1.07726e-07	3.59948e-08
F02C9.4	-2.32977	3.01866	3.22854	NA	NA	0.00803327	6.02258e-08	1.06117e-09
pph-2	-2.36958	3.26088	3.22653	NA	NA	0.239663	0.000160913	0.000127443
F14F9.2	2.71397	2.82264	3.22468	NA	NA	0.179919	0.137108	0.0468764
C18H7.7	-4.33554	3.07704	3.22462	NA	NA	0.005527	9.23247e-06	1.03508e-06
Y66D12A.3	-0.645848	3.39805	3.22408	NA	NA	0.635563	4.03421e-08	3.11426e-07
F11G11.9	-4.33904	3.28715	3.22314	NA	NA	4.06576e-08	2.19909e-14	1.04512e-13
bath-23	0.378842	0.220277	3.22304	NA	NA	1	1	0.0754331
Y47D9A.5	-3.16136	3.2298	3.21943	NA	NA	0.148583	0.000223144	0.00015599
C17H1.7	1.38155	2.47409	3.21936	NA	NA	0.0344889	1.16567e-05	2.55356e-11
M7.7	-0.989419	3.48857	3.21886	NA	NA	0.415573	2.86804e-08	7.95215e-07
str-183	1.31265	2.01278	3.21712	NA	NA	0.770975	0.374481	0.0217849
C09B9.3	-2.55412	3.0827	3.21608	NA	NA	0.00970824	9.79932e-08	7.50144e-09
T25B9.6	-2.8526	3.39539	3.21504	NA	NA	4.37564e-05	4.57916e-15	5.86962e-13
T07A5.7	1.13929	2.11664	3.2134	NA	NA	0.617979	0.166075	0.00275126
F53C3.1	-4.24078	3.12536	3.21313	NA	NA	0.00860527	7.93079e-06	1.9455e-06
clec-154	-1.391	3.2658	3.21141	NA	NA	0.410806	1.92564e-05	2.32194e-05
C33H5.16	-2.50234	3.10798	3.2075	NA	NA	0.0396383	1.63326e-06	2.49884e-07
C50F4.9	0.780201	1.92527	3.20574	NA	NA	0.43765	0.0126702	8.55475e-09
B0524.4	-1.66637	3.40098	3.20212	NA	NA	0.500053	0.000902169	0.00162613
F47H4.2	1.30455	2.46972	3.20038	NA	NA	0.00172629	1.8239e-10	3.09402e-20
clec-79	-2.37077	3.43452	3.19917	NA	NA	1.43009e-05	3.10265e-20	1.01651e-16
F49C12.15	-0.566915	2.91459	3.19555	NA	NA	0.282698	4.35424e-21	4.33912e-26
C50F2.5	-1.79542	3.10393	3.19286	NA	NA	0.0818856	3.26657e-07	5.19456e-08
W09C3.7	-3.09135	3.36648	3.19268	NA	NA	1.4535e-05	5.39017e-15	4.91288e-13
W03F11.4	-2.95684	3.26527	3.19223	NA	NA	1.2335e-10	6.09987e-23	1.42264e-21
C06A1.3	-1.39375	3.41433	3.19085	NA	NA	0.0553848	6.25807e-15	2.28793e-12
F22B5.6	-0.0151707	2.84065	3.19016	NA	NA	1	0.0345976	0.00607897
H04D03.4	0.960241	2.0914	3.18479	NA	NA	0.627052	0.0892072	0.000494462
F22F4.5	0.522399	3.72308	3.18466	NA	NA	1	0.0264752	0.0958565
his-48	0.630761	2.59937	3.17893	NA	NA	0.891092	0.0177223	0.000810096
C35D10.2	-2.36994	3.17053	3.17731	NA	NA	1.94747e-13	4.58903e-29	9.34214e-29
F35C11.3	-0.0909504	4.45097	3.17553	NA	NA	1	0.00724978	0.135096
C05D2.3	-1.43877	3.42316	3.17476	NA	NA	0.137155	8.22875e-11	7.07628e-09
cpr-2	0.817896	4.41306	3.17323	NA	NA	0.976524	0.000133481	0.0262705
C05B5.2	-1.29123	3.34409	3.17309	NA	NA	0.0769006	1.09132e-14	1.03516e-12
C24A11.1	-1.42876	3.28391	3.17203	NA	NA	0.127354	2.01264e-10	1.29792e-09
elo-8	-0.685176	3.36201	3.17156	NA	NA	0.569174	5.23818e-10	1.26259e-08
F36A2.14	-2.1478	2.58574	3.17152	NA	NA	0.00379863	3.36243e-06	6.98461e-11
ZK930.4	-2.70741	3.09471	3.17099	NA	NA	0.00554901	4.45179e-08	9.49247e-09
Y22D7AR.12	-1.73134	2.92941	3.1689	NA	NA	0.0295062	4.85269e-08	3.54038e-10
ttr-12	0.0430274	3.33139	3.16757	NA	NA	1	1.74189e-06	7.76502e-06
B0252.5	-1.9756	2.99278	3.16153	NA	NA	0.0131319	1.52731e-08	4.42766e-10
F21F8.5	0.593901	3.48203	3.16141	NA	NA	1	0.0969422	0.108147
ZK783.6	-2.55194	3.17672	3.16087	NA	NA	0.00986658	3.35018e-08	3.09778e-08
F55H12.5	-0.975798	2.9123	3.16078	NA	NA	0.494665	0.00010458	5.78509e-06
ZK945.6	-2.24346	3.15212	3.15985	NA	NA	0.142243	6.04938e-05	4.18995e-05
C44H9.4	1.14009	1.48989	3.15977	NA	NA	0.141224	0.0619636	3.61177e-10
spe-26	-0.692804	3.27513	3.15727	NA	NA	0.427242	1.45707e-12	1.99714e-11
spe-19	-1.68975	3.03574	3.15717	NA	NA	0.386564	0.000967084	0.000273825
W03F8.2	-1.40985	3.00604	3.1562	NA	NA	0.20541	1.18689e-06	1.0461e-07
clec-73	-2.3381	3.37943	3.15524	NA	NA	9.50484e-08	8.21145e-25	1.11736e-20
C01F6.2	-1.76014	3.1015	3.15456	NA	NA	0.0524493	1.43757e-08	3.96171e-09
C17H12.5	-1.63373	3.10809	3.15187	NA	NA	0.0117401	2.56188e-12	5.78003e-13
T15B12.2	-0.991567	2.922	3.15024	NA	NA	0.365844	1.46518e-06	3.32682e-08
C47E12.12	-0.386704	2.45154	3.15013	NA	NA	1	0.0389685	0.000830516
C06A6.7	-0.859636	2.90326	3.14839	NA	NA	0.556074	0.000164048	1.03049e-05
ZK1248.5	-3.49742	3.20309	3.14723	NA	NA	1.76967e-06	8.52545e-13	2.6629e-12
F43C11.7	0.728546	1.8727	3.14526	NA	NA	0.389747	0.00371997	4.19144e-11
T20H9.6	-0.112474	2.16476	3.14443	NA	NA	1	0.166442	0.00429848
acl-13	-3.78298	3.07677	3.14362	NA	NA	0.00215604	6.94707e-07	2.14787e-07
C49G7.1	-0.539369	2.81901	3.13778	NA	NA	0.699345	0.000155216	3.61028e-06
T28A11.19	0.72284	0.181595	3.13775	NA	NA	0.574291	1	3.90819e-06
F40E12.2	-2.991	3.33904	3.13663	NA	NA	0.00244476	3.84839e-10	1.08734e-08
F14H3.2	-3.96168	2.8861	3.12888	NA	NA	0.0129113	0.00013928	9.17172e-06
Y73B6A.2	-0.629254	3.04498	3.12762	NA	NA	0.891092	0.00590144	0.00241505
C17H12.3	-3.36876	2.94741	3.12537	NA	NA	5.65653e-08	1.56641e-12	7.84268e-15
math-46	2.04039	1.74706	3.12494	NA	NA	0.76453	0.842658	0.135337
chil-2	2.26151	2.40969	3.12494	NA	NA	0.61599	0.504039	0.135337
C03B8.3	-0.717296	2.6463	3.12166	NA	NA	0.891092	0.0177547	0.00160542
Y43C5B.2	-2.54568	3.04361	3.12076	NA	NA	0.0179362	6.18104e-07	1.31226e-07
R07H5.10	1.7125	3.18329	3.11806	NA	NA	0.229633	0.000351881	0.000421986
F39F10.3	0.776997	2.8958	3.11725	NA	NA	1	0.0937572	0.0473654
F36H12.8	-1.9364	3.07502	3.11634	NA	NA	0.31013	0.000378654	0.000172856
C14A6.2	0.123887	2.212	3.11611	NA	NA	1	0.0394429	0.000189582
ZK892.5	-1.59815	3.25102	3.11149	NA	NA	0.119352	4.75154e-08	2.51137e-07
C38C6.5	-2.59585	2.87119	3.11079	NA	NA	0.133124	0.00105059	0.000121838
Y105C5B.17	-0.603457	2.34386	3.1105	NA	NA	0.685029	0.0150002	6.28778e-05
F18C5.4	-1.05906	3.49359	3.11042	NA	NA	0.368916	1.4182e-08	1.88719e-06
clec-123	-4.32266	3.20626	3.10862	NA	NA	1.03518e-15	5.53468e-21	2.19232e-19
K12B6.2	-1.2897	3.39781	3.10803	NA	NA	0.249278	3.46315e-08	1.41826e-06
col-88	-4.57422	3.51875	3.10744	NA	NA	1.50727e-32	2.47871e-36	6.02501e-28
H32C10.1	-1.45329	3.24616	3.10666	NA	NA	0.163607	6.23934e-09	4.86328e-08
C02G6.2	-0.80303	2.87433	3.10658	NA	NA	0.582412	9.474e-05	5.28547e-06
ZC513.3	-0.530737	3.0128	3.10515	NA	NA	0.633564	9.87464e-07	1.65521e-07
sri-38	0.720064	3.18849	3.10413	NA	NA	1	0.169595	0.168662
W06F12.3	-0.773524	2.9782	3.10392	NA	NA	0.592378	6.22695e-06	9.47193e-07
clec-89	0.671652	2.57484	3.10364	0	x	0.412375	1.29368e-07	1.57824e-12
ins-37	-0.353258	3.09007	3.10362	NA	NA	0.770975	1.13557e-05	7.40972e-06
R102.7	1.06134	2.52005	3.10335	NA	NA	0.976524	0.180995	0.0390508
cyc-2.2	-2.91769	2.92677	3.10149	NA	NA	3.78366e-07	1.39869e-12	7.22728e-15
C36F7.5	-3.17088	2.77131	3.0993	NA	NA	0.148129	0.00355248	0.000309538
VH15N14R.1	1.79064	0.788193	3.09905	NA	NA	0.764641	1	0.120118
F28A10.1	-1.12867	3.70804	3.09877	NA	NA	0.611618	7.58975e-06	0.000627587
C46A5.1	0.817339	2.64511	3.09824	NA	NA	0.872984	0.0204081	0.00182334
F47B8.4	-0.429274	2.0492	3.09642	NA	NA	0.856137	0.0795111	0.000492716
ZC373.3	0.555932	3.04908	3.09571	NA	NA	1	0.0499256	0.0267138
Y48G1C.5	-1.55689	3.18064	3.09536	NA	NA	0.0973084	7.56876e-09	2.24167e-08
F27E5.3	-4.14059	3.1432	3.09034	NA	NA	1.08864e-08	7.77535e-14	2.71115e-13
F27C1.3	-0.809291	2.75231	3.08919	NA	NA	0.515577	0.000132044	2.64963e-06
F26A1.3	-3.26751	2.47777	3.0885	NA	NA	0.00707847	0.00123285	1.72772e-06
skr-5	1.38603	1.96509	3.08759	NA	NA	0.068282	0.0133532	1.22441e-07
C33C12.4	0.483685	3.22788	3.08512	NA	NA	0.887547	2.18859e-05	5.66708e-05
F14F7.4	-2.90352	3.048	3.08368	NA	NA	0.00134295	2.71578e-08	1.13676e-08
ZC412.5	-2.16748	3.69429	3.08047	NA	NA	0.32348	8.20824e-06	0.000710563
F54C8.1	-0.671887	2.98886	3.07576	NA	NA	0.368916	1.54006e-11	1.24663e-12
F21A3.4	-1.53524	3.17334	3.07435	NA	NA	0.149351	5.07031e-07	1.40176e-06
F20D6.2	0.98736	0.00666434	3.07404	NA	NA	0.976524	1	0.0414969
ugt-15	1.48018	2.04794	3.07218	NA	NA	0.484913	0.180924	0.00660031
T05F1.8	-0.768162	3.07638	3.07069	NA	NA	0.353653	2.04614e-11	1.8121e-11
Y37E11AR.7	-2.45358	3.62759	3.0696	NA	NA	0.579951	0.000492871	0.00656612
tbx-34	-3.44647	2.80849	3.06914	NA	NA	2.45198e-05	1.47364e-07	7.58409e-10
srx-115	2.82009	3.33835	3.06794	NA	NA	0.43765	0.137694	0.168497
col-7	-0.373394	5.19577	3.06748	NA	NA	1	0.000257302	0.13427
F35C11.2	-1.33772	3.09379	3.06726	NA	NA	0.317489	1.16567e-05	1.09448e-05
D1037.5	-2.03786	3.18337	3.067	NA	NA	0.0381769	4.53447e-08	1.9062e-07
F40E3.5	-0.366393	2.9112	3.06526	NA	NA	0.725152	2.6174e-09	7.47259e-11
scrm-6	-4.4438	3.33976	3.05963	NA	NA	0.00544695	2.43969e-07	5.95966e-06
C34B2.3	-3.27207	2.89491	3.059	NA	NA	0.016651	7.34112e-05	7.41159e-06
R02D5.7	-0.326422	2.55023	3.05871	NA	NA	0.853475	0.000353058	1.12181e-06
C50F4.10	-1.27437	3.40365	3.05547	NA	NA	0.282698	1.46731e-08	1.50084e-06
clec-155	-1.32059	3.06905	3.05521	NA	NA	0.565473	0.0028262	0.00200159
srh-239	-0.575186	2.00538	3.05133	NA	NA	1	0.478828	0.120118
ZK1127.2	-1.06158	3.12088	3.04798	NA	NA	0.127092	1.29411e-12	5.81982e-12
W01D2.3	-3.04229	3.01891	3.04623	NA	NA	0.0516939	6.8557e-05	3.17679e-05
R10D12.10	-1.72466	2.65533	3.04471	NA	NA	0.287813	0.000884952	2.4891e-05
F44G3.7	-2.98513	2.907	3.04413	NA	NA	8.34107e-05	2.30758e-09	9.81054e-11
F07D3.3	-5.24405	2.97646	3.04335	NA	NA	2.52187e-05	1.50394e-07	3.87554e-08
F54H12.8	-1.4408	3.16876	3.04216	NA	NA	0.224024	9.83248e-07	3.6044e-06
W03D8.10	-2.84012	2.98228	3.04195	NA	NA	0.00134201	9.41477e-08	2.66596e-08
tag-293	0.884144	5.4644	3.04172	NA	NA	0.361018	2.16712e-40	5.12421e-07
C09B9.2	-4.45716	2.94138	3.03634	NA	NA	1.66603e-06	1.00987e-08	1.19442e-09
K08F8.5	-0.898461	2.90845	3.03499	NA	NA	0.524405	5.04231e-05	8.07618e-06
F20H11.4	-1.41505	2.60401	3.03497	NA	NA	0.206294	0.000160913	7.26495e-07
W10G11.1	1.71008	0.752067	3.03422	NA	NA	0.763738	1	0.108467
ZK1098.9	-2.44915	2.80857	3.02778	NA	NA	0.184236	0.00225148	0.000408276
Y54G2A.13	-2.44824	2.83972	3.02698	NA	NA	0.0559032	0.000184876	2.07937e-05
C14F11.4	-2.33247	3.28393	3.02284	NA	NA	2.22399e-06	7.11104e-21	8.65378e-17
ZK105.1	0.392851	2.183	3.02261	NA	NA	0.624976	4.08318e-08	2.00574e-18
C18H2.1	-0.34593	2.65665	3.01734	NA	NA	0.808164	0.000152652	1.58716e-06
dod-3	0.996198	0.830685	3.01634	NA	NA	0.0079906	0.133834	3.48783e-22
C55C3.8	-1.47166	2.9442	3.016	NA	NA	0.916089	0.053038	0.0324628
F36A4.4	-3.48562	2.87544	3.01343	NA	NA	0.00333679	2.07785e-05	3.15512e-06
F26H9.8	-1.22912	2.90656	3.01333	NA	NA	0.249263	2.96705e-07	3.68819e-08
Y82E9BL.12	0.246189	1.46373	3.01315	NA	NA	1	0.505175	0.0156947
T04A6.2	1.35529	2.20803	3.00803	NA	NA	0.856906	0.504273	0.108408
F23B2.7	-3.73647	3.0396	3.00732	NA	NA	0.0306243	8.78803e-05	8.075e-05
Y6G8.5	2.0348	2.2229	3.00469	NA	NA	0.00585752	0.00916334	1.15643e-05
C28A5.6	-1.25345	2.7722	3.00376	NA	NA	0.065781	6.70141e-09	3.07512e-11
K05F1.1	-1.67304	2.82885	2.99793	NA	NA	0.497407	0.0115363	0.0035192
K09E4.1	-2.19117	3.09996	2.99421	NA	NA	0.000435403	3.17078e-13	4.47816e-12
oac-8	2.26159	3.15275	2.99331	NA	NA	0.249263	0.0411156	0.0473381
F47D12.10	-2.17434	2.855	2.99293	NA	NA	0.0869642	0.000106738	1.64889e-05
fbxa-202	-3.87395	3.06041	2.99288	NA	NA	3.38421e-05	4.49003e-09	1.00327e-08
F46F5.11	-2.94483	2.94758	2.9921	NA	NA	0.0110057	8.83608e-06	3.1444e-06
T22C1.9	-2.81937	2.97439	2.98776	NA	NA	0.00712656	1.46596e-06	7.8274e-07
T01G6.10	1.29062	1.76821	2.98775	NA	NA	0.946441	0.842957	0.168536
C36E6.8	-5.08574	3.07906	2.98623	NA	NA	9.32268e-06	7.47625e-09	2.77887e-08
M151.7	-1.52856	2.34773	2.98436	NA	NA	0.916089	0.21584	0.0473943
Y116A8A.4	-3.45332	3.19952	2.98302	NA	NA	0.149806	0.000246325	0.000678131
C09G1.2	2.45241	2.19489	2.97271	NA	NA	0.43765	0.504273	0.1083
B0244.9	-2.119	3.14739	2.96847	NA	NA	0.0485766	3.06344e-07	2.49057e-06
F46F5.7	-1.75569	3.25161	2.96843	NA	NA	0.237694	2.42018e-05	0.000210059
srg-32	1.69454	2.60029	2.96762	NA	NA	0.856906	0.414447	0.168427
H20J04.1	-2.44265	2.8785	2.96612	NA	NA	3.92636e-05	2.84224e-11	2.34962e-12
Y37H2B.1	2.28556	2.9239	2.96566	NA	NA	0.249278	0.0637606	0.049349
ZC581.7	-2.82809	3.15156	2.96554	NA	NA	0.00124981	3.00865e-09	5.64257e-08
C10F3.7	0.852294	2.29082	2.96423	NA	NA	0.911987	0.19905	0.01949
K10C9.7	-1.85811	3.08739	2.96185	NA	NA	0.0444448	1.9136e-08	1.14779e-07
Y105C5B.3	1.40704	1.46237	2.96071	NA	NA	0.770975	0.789381	0.0722612
Y105E8A.27	-2.95326	2.92578	2.95966	NA	NA	5.34958e-06	4.06124e-11	1.33566e-11
F16G10.5	-3.13366	2.58311	2.95922	NA	NA	0.213703	0.0189544	0.00166992
frk-1	-2.27768	2.82607	2.958	NA	NA	0.00104654	4.10885e-09	1.94642e-10
Y18H1A.15	-1.82153	2.96688	2.95673	NA	NA	0.00854945	5.40225e-10	4.9422e-10
W06D4.2	-1.86992	3.12574	2.95466	NA	NA	0.000780513	9.46567e-15	1.05754e-12
F16G10.9	1.1041	2.28372	2.95448	NA	NA	0.423924	0.0216297	0.000326622
ssp-16	-3.91536	2.9955	2.95446	NA	NA	6.99383e-15	4.19401e-18	1.8364e-17
F10E9.12	-0.094392	1.87539	2.95315	NA	NA	1	0.00258629	4.542e-10
F29B9.7	-1.86442	2.97789	2.94799	NA	NA	0.310555	0.000909241	0.000783086
B0205.10	-3.47616	2.82748	2.94775	NA	NA	1.92982e-17	3.5286e-19	4.20749e-21
F23C8.1	1.1302	2.70818	2.94519	NA	NA	0.589	0.0204472	0.00532676
fbxa-8	0.928263	1.97251	2.94346	NA	NA	0.680209	0.240731	0.0119264
snf-8	-0.568173	3.1785	2.9408	NA	NA	0.708391	2.91692e-05	0.000161096
ZK20.1	0.107136	1.71365	2.93914	x	x	0.896159	5.24421e-09	1.48941e-26
spe-41	-0.647334	3.05689	2.93852	NA	NA	0.269576	1.25293e-18	8.26071e-17
fbxa-155	-2.2163	2.75039	2.93244	NA	NA	0.0228223	9.75259e-06	5.55002e-07
btb-5	2.51745	2.82746	2.93106	NA	NA	0.521285	0.324505	0.217077
T20G5.12	2.80438	3.00377	2.93045	NA	NA	0.353653	0.20926	0.217749
T19D12.5	1.11288	2.87257	2.9286	NA	NA	0.184236	9.52606e-07	2.84578e-07
T16G12.9	1.00558	2.69313	2.92464	NA	NA	0.654414	0.0155047	0.00406524
attf-1	-1.71424	2.80622	2.92416	NA	NA	0.053274	2.48996e-06	3.28174e-07
F54H5.2	-0.458294	2.91644	2.92348	NA	NA	0.770975	0.000211419	0.000145614
R155.3	-3.0849	2.92315	2.92333	NA	NA	7.22535e-06	2.42421e-10	1.67709e-10
Y43F8C.9	-2.00313	3.32263	2.92278	NA	NA	0.0510553	1.05948e-09	4.56406e-07
Y71G12B.30	-0.494	2.66022	2.92231	NA	NA	0.650175	8.7346e-07	7.44439e-09
B0496.1	-4.0722	2.6471	2.92204	NA	NA	0.0193843	0.00107337	7.62378e-05
B0361.11	-1.53659	3.0015	2.92161	NA	NA	0.352865	0.000166969	0.000210173
bath-25	0.947821	3.13649	2.92151	NA	NA	0.976524	0.0441202	0.0603077
ZK1307.3	0.409189	2.16834	2.92142	NA	NA	1	0.0566021	0.00150123
meg-1	0.802792	2.52036	2.92019	NA	NA	0.912353	0.0864312	0.0192902
K10G6.5	2.20677	3.20489	2.92018	NA	NA	0.229226	0.0170403	0.0373785
F23B2.10	0.735792	2.56531	2.91912	NA	NA	0.919404	0.0628508	0.01584
F47G6.3	-2.53451	2.80582	2.91887	NA	NA	0.0566807	0.000297199	7.03553e-05
T28A11.20	1.51533	1.29996	2.91812	NA	NA	0.500433	0.505175	0.013204
scl-2	0.976655	1.27357	2.91556	NA	NA	0.000277377	1.79875e-05	8.08442e-27
C54G4.3	-2.93086	2.87407	2.9145	NA	NA	0.0017682	3.68691e-07	1.40308e-07
F42G4.2	-2.60575	2.8695	2.91416	NA	NA	4.24412e-05	9.48827e-11	2.18866e-11
sdz-6	1.61373	2.39393	2.91269	NA	NA	0.0536943	0.00237237	1.79623e-05
M28.2	0.737459	2.56376	2.91252	NA	NA	1	0.414447	0.167871
Y64H9A.1	0.522399	-0.833605	2.91088	NA	NA	1	1	0.135437
C42C1.9	-1.37885	2.81114	2.90979	NA	NA	0.218227	3.17774e-06	5.96216e-07
Y52D5A.1	-0.868533	2.90037	2.90961	NA	NA	0.768402	0.0112969	0.00871379
Y39G8B.5	0.638887	1.81838	2.90629	NA	NA	0.770975	0.13779	0.000795436
T13F3.8	-1.21921	2.35648	2.90015	NA	NA	0.526325	0.0128533	0.000251209
Y39A1A.18	0.366417	2.43532	2.89513	NA	NA	1	0.14288	0.0272834
Y53F4B.11	-3.92813	3.084	2.89512	NA	NA	4.86092e-09	7.77535e-14	9.53839e-12
C24A8.5	-0.174007	0.0325754	2.89435	NA	NA	0.901463	1	6.52966e-08
C30H6.12	0.886297	1.65093	2.89299	NA	NA	0.726677	0.293696	0.0052559
srx-51	1.94782	2.73658	2.89298	NA	NA	0.763571	0.324505	0.217401
F48G7.12	1.13848	0.166395	2.89261	NA	NA	0.946746	1	0.135383
Y38F1A.7	-3.16733	3.04027	2.89249	NA	NA	0.0378899	2.50601e-05	7.12371e-05
R01H2.2	-1.46658	3.01149	2.88649	NA	NA	0.223647	6.02578e-06	1.63713e-05
R13G10.4	-2.50066	3.1274	2.88507	NA	NA	0.00324479	4.34677e-09	1.95071e-07
rpl-31	1.94761	0.205495	2.88428	NA	NA	5.27257e-08	0.909645	1.20048e-13
F53B6.7	-0.770898	3.01233	2.88128	NA	NA	0.541531	5.5143e-06	1.5203e-05
F55B11.7	-1.89213	3.23884	2.88085	NA	NA	0.799117	0.0144846	0.0322791
C50C3.2	-1.00669	2.37253	2.88064	NA	NA	0.0665987	4.05244e-08	1.04339e-13
F35E2.9	-1.83884	3.17037	2.87963	NA	NA	0.00134295	1.44932e-15	4.84827e-12
F08H9.3	1.77221	1.75453	2.87857	NA	NA	0.0914152	0.15211	0.00141936
T05E11.7	0.593901	2.57558	2.87747	NA	NA	1	0.414447	0.217283
R09E10.1	0.430146	2.44454	2.87597	NA	NA	0.786763	0.00207285	3.51395e-05
F41F3.1	-2.82117	2.40849	2.87582	NA	NA	0.463366	0.0499378	0.00535955
F16G10.15	1.33297	2.60382	2.87192	NA	NA	0.280445	0.00497837	0.000863736
C38C3.8	-2.94467	3.05185	2.87157	NA	NA	0.212568	0.00162896	0.00268563
ins-16	4.1501	2.10117	2.87122	NA	NA	0.0193716	0.730502	0.216462
F58D5.6	-3.81226	2.75607	2.87071	NA	NA	0.0461754	0.00131387	0.000319701
F34D10.9	-0.554008	2.98386	2.87049	NA	NA	0.643436	4.09024e-07	1.53714e-06
F14F9.3	0.967123	1.49495	2.86943	NA	NA	0.770975	0.451955	0.0120374
K10G4.5	2.74314	2.2634	2.8688	NA	NA	1.13479e-07	0.00169766	3.63697e-06
F26F4.2	-1.17769	2.96355	2.86696	NA	NA	0.0791212	2.04428e-11	1.54304e-10
C02F5.2	-2.08896	2.09541	2.86343	NA	NA	0.799117	0.213869	0.0230109
R06B10.1	-1.78863	2.93925	2.86228	NA	NA	0.00236422	2.09768e-12	9.77513e-12
C45G9.15	-2.10163	2.47528	2.86211	NA	NA	0.32348	0.0222452	0.00266455
C38D9.5	-0.448075	2.9462	2.86107	NA	NA	0.841956	0.000166951	0.00017328
snf-4	-3.94825	2.75437	2.85972	NA	NA	0.000399869	1.05318e-05	2.16009e-06
Y69F12A.1	-0.185027	2.62993	2.85788	NA	NA	0.990717	0.00047098	3.76952e-05
C24G7.2	-0.0658869	1.40475	2.85565	NA	NA	0.946441	0.0210916	1.11446e-12
F18A12.2	-2.15151	2.68333	2.85545	NA	NA	0.579951	0.0395816	0.016086
nspd-7	-1.84475	2.89603	2.85478	NA	NA	5.92784e-05	9.09589e-16	3.03911e-15
srz-100	-0.360126	2.22014	2.85452	NA	NA	1	0.478142	0.217093
rmd-3	-2.6139	2.90507	2.85429	NA	NA	3.21068e-07	2.45373e-14	9.48224e-14
str-182	1.16321	1.41021	2.85331	NA	NA	0.946441	0.930506	0.217093
Y39A1A.2	-1.7356	2.70773	2.85214	NA	NA	0.295129	0.00249621	0.000642207
B0281.1	0.737459	2.71538	2.85087	NA	NA	1	0.324409	0.217093
glr-7	0.259142	-0.252556	2.84879	NA	NA	0.946441	0.901458	0.000136608
T16G12.7	-1.5117	2.77485	2.84771	NA	NA	0.108021	7.42262e-07	1.57985e-07
T09A12.1	-1.53856	2.92037	2.8472	NA	NA	0.457096	0.00264601	0.00236432
C27D8.1	-1.8407	3.05155	2.84159	NA	NA	0.000514143	5.58952e-15	1.98665e-12
ZK1053.6	-5.28381	3.11372	2.84063	NA	NA	7.21711e-06	6.49401e-09	4.29583e-07
klp-17	-2.58395	2.63856	2.84032	NA	NA	0.000275845	2.79219e-07	5.26933e-09
T27C5.8	2.19336	2.75551	2.83958	NA	NA	0.364294	0.164971	0.107651
fbxa-138	1.38755	2.32949	2.83876	NA	NA	0.313734	0.0303729	0.00155391
D1065.3	-0.676499	3.01636	2.83876	NA	NA	0.672248	0.00121353	0.00214486
K09F6.9	1.09241	1.11769	2.83837	NA	NA	0.0120225	0.0422059	4.1963e-16
C49A1.3	-2.78892	2.85506	2.83827	NA	NA	0.000583702	1.0236e-07	1.09887e-07
col-19	-3.98251	4.02653	2.83752	NA	NA	6.85296e-06	5.88093e-22	3.34963e-08
C35E7.10	-3.31367	2.8977	2.8369	NA	NA	2.61558e-08	1.39869e-12	5.81982e-12
cyp-13A1	1.08556	2.00945	2.83593	NA	NA	0.382276	0.0321876	0.000112124
tag-191	-1.96772	2.71673	2.83329	NA	NA	0.0159129	5.09026e-07	6.02585e-08
ZK1098.6	-0.837519	2.64244	2.83243	NA	NA	0.461676	5.78581e-05	4.52082e-06
Y5H2B.1	0.233889	1.25968	2.83083	NA	NA	1	0.889143	0.0881212
nhr-227	2.01157	2.24565	2.82982	NA	NA	0.0775222	0.055079	0.00427631
Y41D4A.3	0.774729	1.84881	2.82914	NA	NA	1	0.842658	0.271815
T10E9.4	-2.83878	2.78636	2.8289	NA	NA	3.44283e-17	6.52534e-22	2.15266e-22
C17G10.6	2.2781	2.2855	2.82783	NA	NA	0.616026	0.47762	0.271815
Y73B6A.1	0.0138943	2.61048	2.82772	NA	NA	1	2.3469e-05	1.11414e-06
C32E8.1	-1.91885	2.18803	2.82656	NA	NA	0.799117	0.213869	0.0324518
protein-tyrosine-phosphatase	0.16061	3.07252	2.81978	NA	NA	1	0.000141657	0.000795809
F59C6.2	-2.62956	2.94738	2.81942	NA	NA	0.00260244	1.19418e-07	6.63923e-07
F46C5.7	0.598455	2.72126	2.81528	NA	NA	0.905499	0.009199	0.00389536
fbxa-201	-1.17178	2.80521	2.81481	NA	NA	0.473869	0.00143308	0.000973355
B0281.6	0.868937	1.68588	2.81246	NA	NA	0.537347	0.106263	0.00023974
fbxa-21	1.30509	2.22554	2.80934	NA	NA	0.0581994	0.000475507	2.85961e-07
Y76B12C.4	-0.592743	2.79617	2.80926	NA	NA	0.913912	0.0103133	0.0062235
C14C6.5	0.768378	1.39679	2.80893	NA	NA	0.00383549	2.1796e-07	8.12184e-24
Y18D10A.21	-1.74397	2.87213	2.80853	NA	NA	0.299753	0.00105059	0.00099481
F36H1.3	-3.47275	2.74945	2.80718	NA	NA	0.000357542	3.98717e-06	1.29562e-06
kin-31	-2.31868	2.77202	2.8058	NA	NA	0.0103099	2.3354e-06	9.62014e-07
fbxa-196	-3.54092	2.63786	2.80193	NA	NA	0.00748353	0.000348066	5.1019e-05
ZK970.8	-4.61632	3.10273	2.80155	NA	NA	0.000371196	3.03489e-07	9.59273e-06
K04A8.10	-0.242561	2.26559	2.79847	NA	NA	1	0.065993	0.00683923
C15A11.2	-0.995008	2.14813	2.79835	NA	NA	0.41419	0.0132846	6.66112e-05
ZK550.2	0.839887	2.40633	2.79755	NA	NA	0.0227081	2.41142e-15	3.34668e-21
F08A8.8	-0.239338	2.94006	2.79311	NA	NA	0.855796	7.61161e-07	3.65577e-06
K01A11.3	0.932816	2.88717	2.79301	NA	NA	0.976524	0.0637523	0.0603077
C07G3.8	3.24501	2.42231	2.79282	NA	NA	0.180495	0.504154	0.272462
F53G12.8	-2.2548	2.34727	2.79078	NA	NA	0.106698	0.012749	0.000532761
C09H10.9	-1.93294	2.87386	2.78527	NA	NA	0.0110932	4.16308e-08	1.3052e-07
W09G12.7	0.580792	2.63052	2.78379	NA	NA	0.621536	5.12288e-06	5.30251e-07
M05B5.3	-0.587435	2.82861	2.78091	NA	NA	0.494274	4.09694e-10	8.93067e-10
dct-3	0.642738	1.47985	2.78046	NA	NA	0.497494	0.05668	1.40825e-07
Y55B1AR.4	-5.11517	2.69524	2.77854	NA	NA	6.54865e-06	3.20033e-06	7.02909e-07
C08F8.4	-2.61954	2.78963	2.77778	NA	NA	2.42551e-05	1.08224e-09	1.00243e-09
M70.1	-3.01174	2.7325	2.77745	NA	NA	0.00189301	1.05318e-05	3.61028e-06
B0218.5	-2.15912	2.65619	2.77483	NA	NA	0.0232436	3.7171e-05	6.11778e-06
F26F2.1	0.729977	1.76118	2.77364	NA	NA	0.678575	0.117581	0.00105711
srd-20	-1.7561	2.88369	2.77241	NA	NA	0.799117	0.0409718	0.0381183
F19B10.4	0.466963	2.72497	2.77201	NA	NA	0.671166	3.03625e-08	1.12057e-08
clec-185	2.22832	2.76821	2.76976	NA	NA	0.61599	0.324852	0.272194
R13A5.11	-3.02941	2.87684	2.76811	NA	NA	2.93356e-05	2.75936e-09	1.68967e-08
Y37E11AR.1	-0.637847	2.56716	2.76799	NA	NA	0.681595	0.00310172	0.000589308
ZK1037.6	1.59644	1.74504	2.76785	NA	NA	0.00282321	0.00900164	3.95571e-08
ZK616.1	0.521346	2.1097	2.76773	NA	NA	0.699628	0.00408843	5.75495e-06
ZK616.7	-2.19505	2.71062	2.76608	NA	NA	0.0308447	7.6566e-05	2.77308e-05
ZK418.2	-2.7542	2.70889	2.764	NA	NA	1.55852e-07	1.72298e-11	3.08953e-12
W02H3.1	2.19976	2.38657	2.75876	NA	NA	0.035563	0.0249999	0.00337329
CD4.5	-0.613039	1.71802	2.75836	NA	NA	0.891092	0.332217	0.0160272
C23G10.1	-2.32745	2.75263	2.75766	NA	NA	0.00505469	9.94357e-07	7.00978e-07
K09D9.12	1.80809	2.20699	2.75705	NA	NA	0.765246	0.504273	0.168554
fbxa-220	2.01674	1.22079	2.75256	NA	NA	0.61599	0.930783	0.168554
T20F5.5	-0.668656	2.97075	2.75132	NA	NA	0.449192	8.53615e-11	7.00315e-09
C49G7.6	0.938297	1.94477	2.74978	NA	NA	0.726677	0.175968	0.0121965
F09C6.1	1.52536	1.06061	2.74932	NA	NA	0.151132	0.483623	0.000894899
R11D1.7	2.55749	1.81554	2.74717	NA	NA	0.179919	0.417191	0.0878012
clp-6	-2.34399	2.89734	2.74543	NA	NA	0.00179893	8.43443e-09	9.91116e-08
ZC239.13	1.29823	1.89375	2.74529	NA	NA	0.358478	0.0887178	0.00137124
K07F5.8	-0.406159	2.51554	2.7451	NA	NA	0.770975	0.00178705	0.000181167
C06C6.7	-2.37272	2.69883	2.74234	NA	NA	0.104244	0.00117033	0.000531355
R11E3.1	0.266614	2.61928	2.742	NA	NA	0.884587	2.04692e-07	1.66367e-08
abf-4	-0.0829089	0.459441	2.74131	NA	NA	1	0.857029	7.50795e-05
vit-6	-2.26014	2.34583	2.74091	NA	NA	3.48465e-15	8.08701e-17	9.78752e-23
col-181	-3.66844	3.29916	2.74059	NA	NA	2.02513e-22	1.32744e-30	4.42533e-20
C34D4.2	-3.23632	2.85045	2.73798	NA	NA	1.27773e-10	1.13747e-14	3.03748e-13
col-124	-2.49334	3.46513	2.73598	NA	NA	7.17914e-14	5.53555e-35	6.2132e-21
fbxa-135	-0.131603	2.62764	2.73576	NA	NA	1	0.151817	0.108073
F22G12.7	1.91035	2.65198	2.73253	NA	NA	0.124833	0.0116722	0.00691707
clec-43	0.267433	1.43155	2.72847	NA	NA	0.869477	0.0331057	1.73043e-09
C31H1.1	-3.14302	2.91572	2.72736	NA	NA	2.16856e-07	4.07018e-12	2.94169e-10
C56G2.5	-2.61308	2.81179	2.727	NA	NA	9.74069e-05	2.09778e-09	8.60619e-09
tag-314	0.0477746	2.7932	2.72261	NA	NA	1	0.000968329	0.00110257
C55C3.6	-0.766906	2.58795	2.72215	NA	NA	0.673571	0.0102713	0.00382996
ZK795.4	0.162693	2.17581	2.72067	NA	NA	1	0.252195	0.0565987
ssq-3	-2.52478	2.89773	2.71702	NA	NA	7.59083e-06	1.87855e-12	1.34896e-10
F25E5.3	1.61582	1.94262	2.71634	NA	NA	0.575183	0.343646	0.0534362
ZK354.8	-1.3118	2.66244	2.71588	NA	NA	0.0832727	1.83291e-07	5.06601e-08
Y23H5A.4	-0.594596	2.73789	2.7139	NA	NA	0.515577	1.37541e-08	1.48956e-08
Y62F5A.10	-1.96778	2.56674	2.71239	NA	NA	0.0203257	2.56392e-05	3.19879e-06
ncr-2	-1.87572	2.75494	2.7122	NA	NA	0.00118713	1.04015e-10	2.06791e-10
col-70	-4.94509	3.20727	2.71092	NA	NA	0.000146648	1.43757e-08	1.21457e-05
D1022.9	-0.45503	2.43588	2.71078	NA	NA	0.770975	0.00046685	2.35823e-05
B0244.5	1.20583	1.77441	2.70188	NA	NA	0.333749	0.0844555	0.000386352
C25G4.6	-2.3975	2.84724	2.70092	NA	NA	5.54454e-09	6.04526e-18	9.45507e-16
M02F4.2	2.3916	2.61027	2.69819	NA	NA	0.249209	0.151817	0.130782
math-6	0.817649	1.51604	2.69665	NA	NA	1	0.930506	0.351914
C47E8.1	-4.44287	2.64718	2.69531	NA	NA	0.00342171	0.000348066	0.0001502
K02E2.7	1.58852	1.75972	2.69498	NA	NA	0.486547	0.379888	0.0629423
Y32B12C.1	0.632425	2.10307	2.69163	NA	NA	0.746083	0.0286507	0.000807181
F44D12.6	-1.64616	2.60357	2.68878	NA	NA	0.100578	7.34833e-05	1.95931e-05
sre-44	1.30242	1.78697	2.68734	NA	NA	0.463848	0.259064	0.0159457
K04H4.5	-0.73003	2.79004	2.6841	NA	NA	0.392252	2.30976e-10	1.76289e-09
T06E6.15	1.46321	2.45842	2.68358	NA	NA	0.368916	0.0432607	0.0158907
F28H7.4	-2.09603	2.58874	2.68341	NA	NA	0.249263	0.00665965	0.00263313
F01G10.5	-2.33432	2.45999	2.6833	NA	NA	0.000355918	1.4589e-06	1.88143e-08
his-70	-2.44087	2.79878	2.68205	NA	NA	9.08382e-07	6.65257e-13	1.29327e-11
C06E4.8	0.765503	1.53763	2.68065	NA	NA	0.637078	0.221259	0.0016933
Y49F6B.12	-1.54541	0.153975	2.67919	NA	NA	0.291082	1	0.00237628
F17C8.7	-1.00658	2.84447	2.67893	NA	NA	0.180296	2.91889e-10	7.24534e-09
snf-7	-2.42377	2.78279	2.67891	NA	NA	0.00296125	4.39144e-07	1.49511e-06
C18C4.7	2.05782	0.661716	2.67853	NA	NA	0.325054	0.983519	0.0538199
F09C6.3	0.0838877	1.01666	2.6783	NA	NA	1	0.71588	0.0357728
fbxa-218	-0.110482	2.66722	2.67519	NA	NA	0.949083	9.95768e-06	6.32279e-06
K01A6.5	0.156822	2.74013	2.67501	NA	NA	1	0.112708	0.0882659
clec-247	-0.548978	0.853905	2.67443	NA	NA	0.741978	0.501136	3.62472e-05
spe-42	-0.69175	2.45725	2.67411	NA	NA	0.491739	0.00030274	2.27422e-05
T09B4.6	0.220813	2.7473	2.67282	NA	NA	1	0.00394039	0.00467143
B0284.4	-0.279936	1.80621	2.67056	NA	NA	1	0.842658	0.351756
Y113G7B.15	1.81765	2.79599	2.67056	NA	NA	0.856906	0.324194	0.351756
AC7.3	-2.69901	2.47331	2.66816	NA	NA	0.0100241	0.000519682	5.45081e-05
F26B1.5	-3.80531	2.78249	2.66487	NA	NA	0.0464193	0.00106997	0.00168365
C09B9.7	-2.75876	2.77715	2.66455	NA	NA	3.08422e-05	5.14088e-09	3.14848e-08
srd-28	0.190346	1.45143	2.6628	NA	NA	1	0.451955	0.0263551
C54D10.12	-0.360126	1.00325	2.66253	NA	NA	1	1	0.270807
F19C7.6	0.272499	2.37712	2.66036	NA	NA	1	0.0284091	0.0061777
clec-258	1.0701	0.93482	2.66002	NA	NA	0.521285	0.687752	0.00606452
str-27	2.96727	2.77977	2.66002	NA	NA	0.225481	0.209346	0.217525
Y57G11B.1	-2.09196	2.77012	2.65928	NA	NA	0.799117	0.0345259	0.0442045
ZK930.6	-0.976498	2.02052	2.6589	NA	NA	0.401796	0.00851063	2.10822e-05
F23B12.1	-3.23849	2.84863	2.658	NA	NA	1.00144e-07	3.81509e-11	2.24411e-09
Y57G11C.5	0.544431	2.2438	2.65792	NA	NA	0.598154	0.000204863	8.67655e-07
6-phosphofructokinase	-2.91033	2.57715	2.65461	NA	NA	3.52187e-07	2.41846e-09	3.28315e-10
elo-7	-2.43485	2.73176	2.65447	NA	NA	0.000190899	1.54082e-08	4.73864e-08
kin-24	-2.82514	2.37362	2.65111	NA	NA	7.2063e-05	1.00841e-05	8.46982e-08
C33F10.8	-3.03543	2.45968	2.65007	NA	NA	7.02225e-07	1.63219e-07	2.69469e-09
H34P18.1	0.626606	1.08275	2.64845	NA	NA	1	1	0.351595
clec-164	3.34903	1.11869	2.64845	NA	NA	0.180729	1	0.351595
F15H10.7	0.215695	2.49865	2.64407	NA	NA	1	0.00119399	0.000250281
gem-4	0.581853	1.59837	2.64276	NA	NA	0.396571	0.00444835	6.09082e-10
ZK1128.3	-2.9925	2.87121	2.64253	NA	NA	0.000946915	9.46203e-07	1.35431e-05
C55C3.3	-1.20161	2.42828	2.6419	NA	NA	0.0699146	3.07583e-07	3.53514e-09
str-87	1.22484	1.72518	2.63868	NA	NA	0.946441	0.842658	0.270376
T10B11.4	0.828859	3.2278	2.63727	NA	NA	1	0.137694	0.270376
F41B5.6	2.09881	2.06059	2.63559	NA	NA	0.0115906	0.0497221	0.00190047
C07G1.6	-3.25263	2.44468	2.63083	NA	NA	0.0112658	0.00250041	0.000373548
tag-19	-3.40847	2.79967	2.63062	NA	NA	0.000101903	2.85367e-07	2.64988e-06
cyp-34A5	0.912782	1.72158	2.62909	NA	NA	0.353653	0.0427841	3.48471e-05
C56G7.2	-0.259254	2.74386	2.62879	NA	NA	0.897489	0.00177769	0.00216487
fbxa-224	-2.05859	2.67923	2.62809	NA	NA	0.249263	0.00350999	0.00327077
K11H12.6	0.202746	2.35757	2.62772	NA	NA	1	0.261103	0.159986
Y1A5A.1	-4.25168	2.6604	2.62321	NA	NA	1.63149e-19	3.97898e-15	1.20048e-14
srh-266	1.79635	2.66864	2.62297	NA	NA	0.856906	0.414447	0.351479
Y39A3A.3	-0.00824269	1.28419	2.6209	NA	NA	1	0.358063	0.00170591
C17B7.10	0.23256	0.804574	2.6201	NA	NA	0.919404	0.579006	0.000128554
C46C2.3	1.11545	1.71561	2.61904	NA	NA	0.512502	0.190529	0.00629694
col-60	-5.27278	3.06632	2.61702	NA	NA	4.37417e-46	2.46305e-29	4.18034e-21
R03D7.5	-1.97377	2.49014	2.61597	NA	NA	0.0905441	0.00131262	0.000347924
C18E3.4	0.979292	1.77024	2.61491	NA	NA	0.946441	0.731006	0.217172
Y106G6G.1	-0.983774	2.5648	2.61435	NA	NA	0.401501	7.93671e-05	2.9835e-05
ttr-23	0.913667	1.45936	2.61255	x	x	0.0964653	0.00833367	1.5275e-10
ttr-34	-3.13403	2.9156	2.60974	NA	NA	1.12713e-06	2.56148e-11	1.62528e-08
F35E2.5	-2.05663	2.27189	2.60359	NA	NA	0.000837062	8.16449e-06	2.27907e-08
T22D1.8	-0.636229	2.30293	2.5951	NA	NA	0.891092	0.0768138	0.01865
fbxa-42	-1.38647	2.75037	2.59403	NA	NA	0.631295	0.0292139	0.036231
str-165	1.66746	1.00325	2.59183	NA	NA	0.856906	1	0.351885
Y113G7C.1	-2.75552	2.67991	2.59166	NA	NA	7.17914e-14	1.33077e-17	2.89493e-16
clec-201	2.86818	2.40917	2.58891	NA	NA	0.353653	0.504039	0.351868
oac-23	-2.47624	2.5084	2.58773	NA	NA	0.000340497	1.9726e-06	4.16252e-07
Y39G8C.2	-1.46201	2.57059	2.58754	NA	NA	0.0635734	3.53771e-06	2.15692e-06
F14F8.8	0.898474	2.13827	2.58737	NA	NA	0.360606	0.0019967	2.47281e-05
K09E3.7	0.918215	1.3196	2.58686	NA	NA	0.911987	0.668903	0.0795372
nhr-221	2.42418	2.40995	2.58599	NA	NA	0.521285	0.504039	0.351851
K09B11.5	-1.92471	2.49864	2.58485	NA	NA	0.0223948	3.30215e-05	8.46958e-06
Y49E10.29	-1.44407	3.50235	2.58428	NA	NA	0.62881	0.000849113	0.0310085
twk-6	-1.77863	2.99227	2.58132	NA	NA	0.236243	0.000183919	0.00212063
srh-244	1.72853	1.532	2.5803	NA	NA	0.763738	0.8437	0.272862
T07D1.5	0.688287	-0.072413	2.57428	NA	NA	1	1	0.108167
W04A8.4	0.599299	1.59819	2.57395	NA	NA	0.108137	2.41106e-07	8.59889e-20
ptc-2	0.774729	0.515527	2.5722	NA	NA	1	1	0.35116
nas-24	1.93031	2.03434	2.57159	NA	NA	0.325054	0.252071	0.0565819
ZK849.4	-3.32564	2.83629	2.5708	NA	NA	1.84133e-05	2.00451e-08	1.18486e-06
sru-29	2.32692	2.84881	2.57064	NA	NA	0.61599	0.32484	0.35116
C30A5.4	-1.56878	2.75407	2.56931	NA	NA	0.499094	0.0178196	0.028287
ZK484.7	-2.54304	2.34876	2.56827	NA	NA	1.54094e-05	9.27993e-07	1.16693e-08
fbxa-223	-4.25521	2.48738	2.5672	NA	NA	0.012993	0.00278536	0.00102927
F56F11.5	2.34893	2.67026	2.56432	NA	NA	0.0027213	0.00254718	0.00452771
ent-3	-0.0649742	2.44543	2.56373	NA	NA	0.981966	1.16156e-08	6.31646e-10
dpy-17	0.0759606	2.55183	2.5615	NA	NA	1	1.13163e-16	1.42483e-16
F58E6.12	-3.37898	2.80026	2.56138	NA	NA	0.148129	0.00308769	0.00620967
R11A8.8	-1.40345	2.47767	2.56002	NA	NA	0.248416	0.000768058	0.000245507
Y38F1A.1	-1.82375	2.47676	2.55437	NA	NA	4.5691e-05	1.16343e-10	1.20264e-11
T11F9.8	-1.45358	2.91936	2.55377	NA	NA	0.916089	0.0781141	0.131506
C06C3.8	0.690228	1.87255	2.55335	NA	NA	0.766313	0.0982056	0.00466285
C01G10.17	0.522984	1.17866	2.55307	NA	NA	0.799265	0.437952	0.00223401
F55G11.4	0.543605	0.424311	2.55199	NA	NA	0.150963	0.439962	1.87139e-20
K11H3.2	-1.07051	2.63735	2.55173	NA	NA	0.440771	0.000631483	0.000807211
col-106	-3.68287	3.0576	2.54984	NA	NA	7.74815e-22	8.95711e-26	6.842e-17
fbxa-89	0.549424	1.79698	2.54661	NA	NA	0.958594	0.170764	0.01014
str-260	0.674092	1.46271	2.5444	NA	NA	1	0.930506	0.437794
C12D5.4	3.04722	0.785699	2.54361	NA	NA	0.0722658	0.96326	0.174587
Y43F8B.9	0.335102	1.4897	2.54356	NA	NA	0.705285	0.00790555	1.84318e-09
W03D8.7	-0.360126	2.00291	2.54278	NA	NA	1	0.730502	0.351595
grl-26	2.49131	2.73678	2.54278	NA	NA	0.521285	0.324505	0.351595
Y47H10A.5	0.602037	2.06194	2.54051	NA	NA	0.25246	4.48787e-09	9.89853e-15
srh-112	1.62238	-0.512721	2.53977	NA	NA	0.856906	1	0.351595
T25B9.2	-2.17114	2.71137	2.5371	NA	NA	0.579951	0.0339509	0.042146
ZK809.1	-2.8634	2.32471	2.53583	NA	NA	0.00346717	0.000798539	6.97051e-05
C03A7.12	1.48417	1.69597	2.53437	NA	NA	0.24976	0.175134	0.00856108
F44F4.10	-0.989587	2.09214	2.53363	NA	NA	0.423924	0.0123401	0.000398674
F40F11.4	-0.223003	2.79181	2.53265	NA	NA	1	0.136987	0.144859
Y47D3B.3	-1.72303	1.49986	2.52898	x	x	0.0517367	0.064292	1.05329e-05
Y71F9AL.2	-1.68898	2.53884	2.52636	NA	NA	0.0250564	2.86073e-06	2.5028e-06
R06B9.2	-1.57981	2.13766	2.52473	NA	NA	0.500433	0.142514	0.0298345
oac-14	0.670893	1.65256	2.52111	x	x	0.0205279	1.07631e-09	8.77254e-21
F32B5.1	-1.77446	2.79987	2.52086	NA	NA	0.00302769	3.64076e-10	8.12254e-08
ZK688.1	1.03367	2.04512	2.51798	NA	NA	0.726677	0.185646	0.033885
C53A5.11	0.796349	1.33071	2.51782	NA	NA	1	0.889143	0.174587
Y46G5A.22	0.820206	2.50869	2.5178	NA	NA	0.293116	8.26441e-07	4.96132e-07
str-204	-0.373394	2.33129	2.51701	NA	NA	1	0.478201	0.437496
C31B8.12	2.09539	2.21864	2.5158	NA	NA	0.0589536	0.0488885	0.0130042
T14G10.8	-1.62845	2.60677	2.51013	NA	NA	0.000480002	6.6463e-12	6.93708e-11
col-63	-6.17766	2.6567	2.50975	NA	NA	3.80114e-148	1.05747e-19	1.53904e-17
C16C10.13	0.0123302	2.50143	2.50911	NA	NA	1	0.101854	0.0675201
ZK381.8	-0.20888	2.35982	2.5077	NA	NA	0.898231	0.0173286	0.00601087
B0034.4	-0.628681	1.56043	2.50743	NA	NA	0.770975	0.239952	0.0076438
F56G4.7	-3.07035	2.69065	2.50727	NA	NA	0.0701334	0.00105979	0.0022243
F57B9.8	-1.57428	2.44405	2.50564	NA	NA	0.0170904	9.46203e-07	2.76955e-07
C26B2.2	-0.691834	2.49883	2.5042	NA	NA	0.550797	0.000147254	9.02081e-05
K08C9.1	-4.15151	3.07391	2.50248	NA	NA	0.0054245	7.72395e-06	0.00109734
ZK507.3	-3.48968	2.64771	2.49737	NA	NA	0.00331679	0.000199201	0.000515001
oac-19	-3.038	2.62751	2.49662	NA	NA	0.000480002	5.6469e-06	2.0211e-05
C01G10.5	0.543532	0.709908	2.49569	NA	NA	0.634266	0.607024	4.00204e-06
Y39E4B.11	-2.43666	2.35779	2.49506	NA	NA	4.84928e-05	1.10345e-06	8.19997e-08
wht-3	-0.247876	2.4527	2.49255	NA	NA	0.915271	0.00642671	0.00287969
sri-19	1.77473	1.82766	2.49073	NA	NA	0.856906	0.842658	0.4371
T22B11.1	-0.804429	1.51287	2.48942	NA	NA	0.669844	0.265753	0.00872588
Y46G5A.10	-2.81187	2.5743	2.48454	NA	NA	4.18621e-14	5.027e-16	9.40033e-15
F28A10.4	-1.8649	2.90724	2.48385	NA	NA	0.799117	0.0489708	0.0955879
C49C8.1	-2.30052	2.35019	2.48104	NA	NA	0.00504608	0.000164001	2.72433e-05
C36B7.8	2.49528	1.33367	2.4806	NA	NA	0.217485	0.789679	0.160063
F59A7.7	1.69327	2.36472	2.4804	NA	NA	0.587489	0.261103	0.174587
C42C1.3	-2.13361	2.26648	2.47976	NA	NA	0.136872	0.0155047	0.00430697
B0507.7	0.729029	1.44897	2.47959	NA	NA	1	0.789374	0.174587
W09G12.8	-0.0367781	1.91459	2.47951	NA	NA	1	0.275517	0.0571708
C06G4.6	-2.65044	2.48965	2.479	x	x	0.000911321	1.62967e-05	1.21549e-05
F32H2.12	1.04645	2.36098	2.47093	NA	NA	0.946441	0.414447	0.271793
col-140	-2.8385	3.59672	2.46673	NA	NA	2.79159e-15	2.07041e-36	1.34567e-15
C01G5.3	-4.60595	2.27052	2.46449	NA	NA	0.00227768	0.00554539	0.000751176
F23D12.5	1.12432	1.68119	2.4624	NA	NA	0.815457	0.44243	0.112349
F48C1.8	0.918146	2.01886	2.46056	NA	NA	0.726677	0.162988	0.0296376
Y69A2AR.25	1.10968	2.04785	2.45969	NA	NA	0.386896	0.048983	0.00535178
srn-1	1.82935	1.93146	2.45686	NA	NA	0.187605	0.20182	0.0392394
C50H2.7	-2.66637	2.24782	2.45677	NA	NA	0.463441	0.0937572	0.0342542
F22B8.6	-0.10813	1.40222	2.45582	NA	NA	0.903974	4.46096e-06	1.09431e-18
F55B11.6	-0.416995	2.77452	2.45524	NA	NA	1	0.093358	0.159969
W03F9.3	0.0254957	2.9565	2.45457	NA	NA	1	0.0130864	0.0569432
T08E11.8	0.310507	2.08844	2.45439	NA	NA	0.976524	0.0446336	0.00643842
M163.11	0.413173	1.09049	2.44442	NA	NA	0.982339	0.668903	0.0626563
T15H9.4	-2.90473	2.43733	2.44421	NA	NA	0.0148105	0.00118396	0.000649438
Y57G11C.18	0.979292	2.19437	2.4433	NA	NA	0.946441	0.504273	0.271348
srg-31	1.69062	1.3488	2.44249	NA	NA	0.000605737	0.0787566	2.59505e-06
C43E11.5	-2.58849	2.34893	2.44149	NA	NA	0.00723775	0.00058439	0.000156431
C28H8.7	1.13138	2.61158	2.43844	NA	NA	0.946441	0.414447	0.437727
srxa-15	2.75022	1.784	2.43671	NA	NA	0.43765	0.842658	0.436194
cyn-2	-1.70911	2.50331	2.43554	NA	NA	7.22535e-06	3.64033e-14	2.9934e-13
W03G11.2	-1.06637	3.16779	2.43434	NA	NA	0.961133	0.0104624	0.0676404
C07A9.13	-1.78227	2.79569	2.43257	NA	NA	0.310555	0.00314799	0.0145414
Y54E5A.2	0.150378	2.30021	2.43186	NA	NA	0.950514	8.44718e-07	7.35013e-08
ZK84.2	-1.61057	2.67234	2.42926	NA	NA	0.0206552	8.34343e-08	3.35343e-06
Y66A7A.4	-2.14292	2.19857	2.42902	NA	NA	0.00293427	0.000353051	1.64939e-05
K04C2.8	-1.5976	2.35816	2.42803	NA	NA	0.291722	0.0115535	0.00613606
srr-2	1.47538	1.96976	2.42602	NA	NA	0.108981	0.0291785	0.00167069
H01M10.2	-0.0207082	1.3487	2.42321	NA	NA	1	0.583644	0.130635
fbxa-134	0.705341	1.76663	2.42288	NA	NA	0.936943	0.259464	0.0389252
duo-2	1.51745	2.48261	2.4215	NA	NA	0.770975	0.21584	0.214559
rol-1	-4.58446	2.41261	2.42129	NA	NA	4.48285e-102	1.66459e-17	4.88504e-17
lys-7	1.12192	0.207498	2.42118	NA	NA	8.31973e-07	0.737005	5.04442e-19
col-49	-4.08229	2.45424	2.41666	NA	NA	2.84158e-82	1.22776e-18	1.22878e-17
F29D10.3	0.156822	1.91015	2.41658	NA	NA	1	0.442185	0.144841
B0348.2	1.18588	2.26168	2.41567	NA	NA	0.205487	0.0026054	0.000579387
F22G12.8	1.46622	2.32061	2.41445	NA	NA	0.287813	0.0270941	0.0119264
W08E12.2	1.15611	1.27539	2.41251	NA	NA	5.24073e-05	8.76761e-05	1.96843e-17
ZK285.2	1.26151	2.02064	2.41219	NA	NA	0.946441	0.730889	0.43735
str-44	1.97705	2.59403	2.41219	NA	NA	0.427193	0.151817	0.174587
F41E7.6	2.22832	1.00325	2.41219	NA	NA	0.61599	1	0.43735
abt-1	-1.32112	2.56796	2.40915	NA	NA	0.118164	9.28491e-06	4.34834e-05
Y75B8A.32	0.936061	2.15106	2.40831	NA	NA	0.325481	0.00158009	0.000125348
rab-11.2	1.43006	1.5161	2.40764	NA	NA	0.361018	0.341823	0.0283887
F59A7.9	-3.22064	2.2942	2.40556	NA	NA	0.00079043	0.00111058	0.000266996
sfxn-1.4	-1.37795	2.53367	2.40526	NA	NA	0.0503456	3.03489e-07	1.77615e-06
F28H7.6	-0.78154	2.22821	2.40493	NA	NA	0.289314	5.04214e-05	3.07839e-06
clec-174	1.01609	1.74221	2.40036	NA	NA	0.339738	0.0474491	0.000578675
F42G4.6	-0.849832	2.58759	2.39777	NA	NA	0.554802	0.00159289	0.00357872
R02C2.7	3.55108	3.60083	2.39566	NA	NA	0.0742369	0.0404466	0.352338
F45E4.6	-3.03858	2.08625	2.3923	NA	NA	0.005527	0.00924431	0.000587089
H01G02.4	-2.15151	2.30402	2.39197	NA	NA	0.579951	0.12386	0.0615344
ins-4	0.342474	0.415993	2.39132	NA	NA	0.729042	0.786846	3.41791e-08
C31H1.2	0.356016	2.18543	2.38941	NA	NA	0.946441	0.016444	0.00394017
ant-1.3	-2.5155	2.53355	2.38819	NA	NA	1.70253e-17	1.84571e-19	6.66454e-17
ZC196.6	-0.204675	1.54696	2.3872	NA	NA	1	0.284229	0.0193879
tag-32	-1.85261	2.00773	2.38601	NA	NA	7.05689e-09	1.50901e-10	1.64492e-15
C25H3.1	0.64459	1.88274	2.38401	NA	NA	0.709076	0.0693811	0.00520044
dhs-16	1.78377	2.06801	2.38391	NA	NA	2.29224e-08	1.26159e-08	4.62318e-12
T04B8.3	-0.700116	0.756256	2.383	NA	NA	0.891092	0.811347	0.0444146
clec-236	-2.40381	2.4777	2.37978	NA	NA	0.00101812	7.90562e-06	1.71335e-05
Y60A3A.24	0.164562	1.9728	2.37546	NA	NA	1	0.00784961	0.000186039
srh-35	1.57929	2.12654	2.37103	NA	NA	0.485382	0.252293	0.158726
ZC155.2	0.182929	2.26045	2.37084	NA	NA	1	0.0188344	0.00696285
C44E4.7	2.11154	1.5134	2.3659	NA	NA	7.46338e-08	0.00877307	1.08446e-07
F26D11.13	0.872383	1.63573	2.36428	NA	NA	0.976524	0.502846	0.144841
fbxa-188	1.02523	1.64814	2.35907	NA	NA	0.311453	0.0849965	0.00149018
F31E9.6	0.983915	1.74286	2.35868	NA	NA	0.494665	0.106403	0.00708772
F01G12.1	-0.171141	2.88046	2.35652	NA	NA	1	0.265074	0.436426
H04J21.1	-1.52817	2.43694	2.35519	NA	NA	0.0291791	3.27706e-06	7.41686e-06
chil-7	1.32806	1.26637	2.35501	NA	NA	0.414004	0.46121	0.026523
cyp-33D3	1.54035	1.49432	2.3547	NA	NA	0.380608	0.362946	0.0510753
T23E1.3	-0.930122	2.44146	2.3542	NA	NA	0.627786	0.0084499	0.00880237
Y105E8A.32	-0.279936	0.462709	2.35243	NA	NA	1	1	0.411084
Y73C8B.5	-1.28267	0.892065	2.35188	NA	NA	0.916089	0.974282	0.174579
Y17G7B.14	1.71163	2.69241	2.35071	NA	NA	0.334937	0.0272779	0.0629256
srx-104	1.13848	-0.831479	2.35023	NA	NA	0.946746	1	0.351914
C49G7.10	0.165855	1.06758	2.34943	NA	NA	0.847256	0.0166727	3.51095e-13
F31F4.17	-2.94509	2.64261	2.34915	NA	NA	0.289256	0.0156299	0.0394097
srt-41	2.50133	2.98069	2.34879	NA	NA	0.521285	0.265074	0.411084
W03G1.2	-2.72172	2.23852	2.34559	NA	NA	0.00189964	0.000571279	0.000141766
Y37E11AL.2	-2.42126	2.50495	2.34549	NA	NA	0.000245612	9.00773e-07	7.7558e-06
lipl-2	1.84625	1.19883	2.34392	NA	NA	1.28455e-07	0.0289974	1.50612e-09
F59B2.11	0.773022	0.0645585	2.34132	NA	NA	0.686418	1	0.023562
K09F6.10	0.443244	0.586265	2.34088	NA	NA	0.450142	0.371791	1.88056e-12
cyp-33C3	1.26506	1.82493	2.34055	NA	NA	0.0268182	0.00392393	1.4732e-05
fbxa-137	0.928104	1.60762	2.33887	NA	NA	0.919404	0.399755	0.0715451
col-122	-4.41978	2.90841	2.33858	NA	NA	1.05896e-36	5.93358e-26	2.66122e-16
F28B12.1	0.465608	1.63149	2.33847	NA	NA	0.484299	0.000234985	4.542e-10
F13A7.11	0.366913	1.28545	2.33818	NA	NA	0.832005	0.118334	1.74082e-05
oac-32	0.125703	1.8731	2.33809	NA	NA	0.891818	6.08864e-09	1.576e-14
Y51H7C.13	-3.79752	2.42857	2.3303	NA	NA	2.54017e-57	1.39017e-19	1.05123e-17
T16D1.1	-0.453585	2.23512	2.32697	NA	NA	1	0.478201	0.436015
B0205.5	1.88601	1.91063	2.32629	NA	NA	0.502808	0.417132	0.258364
try-1	0.27062	1.86786	2.3247	NA	NA	1	0.201082	0.0394478
cng-1	0.737625	0.561527	2.32457	NA	NA	0.381351	0.673096	3.20218e-05
K07A12.5	-0.658558	2.16125	2.32217	NA	NA	0.534729	0.00158009	0.000283216
F35E8.2	1.00108	1.45578	2.32019	NA	NA	0.574443	0.346495	0.0294406
F23C8.8	-1.6584	2.42874	2.31851	NA	NA	0.0364615	9.48936e-06	2.70458e-05
Y116A8C.24	-3.82644	2.08173	2.31702	NA	NA	0.0455974	0.0405798	0.00998468
col-20	-2.53418	3.24529	2.31702	NA	NA	6.81578e-09	1.96481e-23	4.02823e-10
R07H5.9	-0.203872	2.17311	2.31659	NA	NA	0.898231	0.00840803	0.00236432
srw-63	3.35072	1.80621	2.31364	NA	NA	0.180729	0.842658	0.410314
Y95B8A.4	-2.10455	2.83162	2.31253	NA	NA	0.0688584	3.68023e-05	0.0020195
Y71G12B.32	-0.280031	2.08744	2.30935	NA	NA	0.915583	0.0331957	0.00948279
fbxc-19	0.704339	1.97712	2.30856	NA	NA	0.851958	0.180701	0.0704823
spe-12	-0.714147	2.48466	2.30754	NA	NA	0.767287	0.0167306	0.0214221
fbxb-53	-1.52856	0.307012	2.30712	NA	NA	0.916089	1	0.174607
Lys-3	0.541306	1.80647	2.30251	NA	NA	0.590163	0.00991682	0.000124723
C28H8.8	1.85849	1.73637	2.29629	NA	NA	0.50288	0.502846	0.214559
C18D4.8	0.661337	1.49507	2.29482	NA	NA	0.587489	0.0983109	0.000496278
M88.3	-0.114445	2.31693	2.29443	NA	NA	0.963252	1.40446e-05	1.37713e-05
Y71G12B.2	1.80677	2.27909	2.29359	NA	NA	0.0208463	0.00530237	0.00396591
rrf-2	1.0329	1.78857	2.29261	NA	NA	0.00706185	1.70124e-06	1.5398e-11
fbxc-20	-2.05114	1.74128	2.29144	NA	NA	0.407892	0.243888	0.0413292
sri-11	2.49117	1.46165	2.28906	NA	NA	0.521285	0.930506	0.409853
acbp-4	-0.234971	2.91466	2.28885	NA	NA	0.980943	0.0152048	0.0715753
K09H11.9	0.774729	2.5025	2.28716	NA	NA	1	0.504039	0.409853
H31B20.1	4.33063	2.63299	2.28716	NA	NA	0.0111363	0.414148	0.409853
cyp-33C2	1.94914	2.24749	2.28101	NA	NA	0.29018	0.123967	0.0831352
F54A3.4	-2.78295	2.44023	2.28057	NA	NA	1.31918e-11	7.72663e-12	3.95137e-10
cpb-2	-2.90635	2.35508	2.28018	NA	NA	7.54474e-12	1.24477e-10	6.28501e-10
C01G5.4	-2.7128	2.17285	2.27885	NA	NA	4.64246e-07	2.04784e-06	2.21806e-07
F38H4.5	0.590064	2.41126	2.27853	NA	NA	0.637895	0.00108766	0.00187862
F53G2.3	0.945994	2.61593	2.27765	NA	NA	0.976524	0.151817	0.258364
C18E3.1	-2.16415	2.30781	2.2775	NA	NA	0.000852836	1.33874e-05	1.5924e-05
Y32G9A.3	-2.63448	1.99905	2.27634	NA	NA	0.463644	0.176024	0.079361
C02F5.10	-1.38637	1.36401	2.27537	NA	NA	0.561945	0.414447	0.0361246
Y37H9A.2	-0.0909504	2.41249	2.27181	NA	NA	1	0.261103	0.258364
Y38E10A.25	-0.565118	1.32457	2.27176	NA	NA	1	0.789863	0.214365
Y64G10A.3	2.24673	1.0385	2.27042	NA	NA	0.61599	1	0.411407
Y6G8.6	1.35354	0.435337	2.2686	NA	NA	0.946441	1	0.411389
Y34F4.4	1.72231	2.03349	2.26823	NA	NA	0.000483248	0.000474433	2.55376e-05
atl-1	1.09457	1.41787	2.2653	NA	NA	9.43316e-05	6.08004e-06	6.10168e-16
F53A9.8	0.470917	1.07043	2.26519	NA	NA	0.289468	0.000800366	1.89036e-16
pmk-2	0.627188	1.20448	2.26433	x	x	0.111329	0.000733665	2.13543e-14
F53C3.6	1.10831	1.98586	2.26002	NA	NA	0.0906781	0.00109031	5.72996e-05
spe-6	-1.30193	2.15618	2.25858	NA	NA	0.00529692	4.23223e-08	3.43517e-09
srt-59	2.77221	2.06619	2.25824	NA	NA	0.43765	0.729986	0.409102
Y54F10BM.3	-2.12668	2.19529	2.25628	NA	NA	5.46537e-09	1.26328e-10	2.02341e-11
clec-75	1.78557	2.02689	2.25557	NA	NA	2.61472e-05	9.9939e-05	3.87515e-06
nhr-181	1.31842	1.76063	2.25524	NA	NA	0.104855	0.040055	0.00174215
ins-11	-0.305613	1.92939	2.25449	NA	NA	0.815885	0.00998781	0.000656862
fbxa-100	-0.373394	1.48936	2.25435	NA	NA	1	0.930506	0.409086
thn-3	1.04645	0.822763	2.25233	NA	NA	0.946441	1	0.43867
Y32F6A.6	-0.47212	2.1285	2.25139	NA	NA	0.693115	0.00473117	0.00117678
T04A6.3	0.705109	2.29907	2.24938	NA	NA	0.779456	0.0382351	0.0298811
C49G7.5	0.387694	1.29098	2.24772	NA	NA	0.770975	0.156783	0.000488346
K02E7.4	-0.668644	0.221302	2.24756	NA	NA	1	1	0.438624
Y38E10A.13	-0.0160516	1.2803	2.24745	x	x	0.981966	9.76111e-06	1.66605e-16
C14A4.8	-0.0297933	2.29631	2.24675	NA	NA	1	0.000373705	0.000430003
K08E7.4	0.836288	0.613644	2.24498	NA	NA	0.976524	0.96326	0.174626
spe-10	-1.14018	2.43354	2.24495	NA	NA	0.22301	5.02835e-05	0.00020735
spe-9	-1.43745	2.4076	2.24391	NA	NA	0.0940566	0.000176147	0.000541318
T08A9.5	1.58218	1.74706	2.23997	NA	NA	0.587489	0.502846	0.258364
R08F11.7	1.28964	0.853593	2.23781	NA	NA	0.461676	0.720756	0.0528739
F43E2.6	-0.790046	1.50685	2.23768	NA	NA	0.585169	0.219468	0.00941885
E02H4.2	-0.105889	2.27639	2.23696	NA	NA	1	0.0686969	0.0536259
C06G4.4	-1.38818	1.98767	2.2363	NA	NA	0.099017	0.00220648	0.000158973
K08D10.9	1.12345	0.991497	2.23624	NA	NA	0.0912861	0.307424	0.000108205
F25B3.4	0.515508	2.12312	2.23533	NA	NA	0.60787	0.000353051	7.35424e-05
tag-80	0.830603	0.705667	2.23073	NA	NA	0.718159	0.798515	0.0326262
Y26D4A.2	1.32254	0.982401	2.22788	NA	NA	0.461676	0.608963	0.0412074
K08E4.7	-3.01741	2.33507	2.22624	NA	NA	2.23404e-05	2.54958e-05	6.71971e-05
Y39H10A.1	1.30151	1.98443	2.22383	NA	NA	0.300377	0.0545566	0.0147914
sri-62	1.89986	1.77024	2.22338	NA	NA	0.848182	0.731006	0.438226
srt-61	1.37081	1.82766	2.22277	NA	NA	0.946441	0.842658	0.408237
F22F1.2	-0.562836	0.460978	2.21916	NA	NA	0.811538	0.903933	0.0213943
fbxa-182	0.915511	2.04249	2.21743	NA	NA	0.0189473	1.38889e-09	1.74543e-11
W03D2.6	0.832717	1.04791	2.21068	NA	NA	0.0589125	0.0423794	6.48626e-10
Y82E9BR.6	1.58786	1.50652	2.20899	NA	NA	0.427242	0.505175	0.146451
K10B4.1	-0.453585	0.487279	2.20887	NA	NA	1	1	0.410104
W09C5.9	0.593901	1.03782	2.20887	NA	NA	1	1	0.410104
Y47G6A.13	-0.759216	2.18451	2.2082	NA	NA	0.344746	4.82737e-05	2.21395e-05
oac-3	1.39767	1.89014	2.20601	NA	NA	0.770975	0.417191	0.258364
F15A4.9	-1.04869	2.02762	2.20519	NA	NA	0.359998	0.0121754	0.00274773
C45E5.3	0.931734	1.86003	2.20518	NA	NA	0.726827	0.228636	0.0838989
F46E10.2	-0.453585	1.00325	2.20506	NA	NA	1	1	0.410104
C07E3.4	-1.95566	2.08038	2.20462	NA	NA	0.0203257	0.00289527	0.000718281
T13A10.1	-2.15151	1.88545	2.20352	NA	NA	0.579951	0.275967	0.113498
ZK686.5	-1.82517	2.24161	2.2032	NA	NA	0.0151777	0.000164148	0.000174953
C45E1.4	0.284099	1.55201	2.20134	NA	NA	0.727736	0.000292621	1.7004e-09
W10C6.2	0.424814	1.19463	2.19713	NA	NA	1	0.930666	0.437861
R09B5.12	-1.14021	1.93616	2.19601	NA	NA	0.440852	0.0382719	0.00728224
Y53G8AR.1	0.973514	1.92199	2.19547	NA	NA	0.816032	0.292999	0.158993
F19B10.2	-2.17114	1.94771	2.19402	NA	NA	0.579951	0.240731	0.113327
Y87G2A.20	-2.02039	2.40839	2.19339	NA	NA	0.799117	0.120704	0.134197
B0284.1	0.155431	1.44959	2.19273	NA	NA	1	0.299751	0.0234263
nhr-178	0.67475	1.43502	2.19203	NA	NA	0.611618	0.170859	0.00419134
fbxa-69	0.576556	1.66981	2.19075	NA	NA	0.579951	0.0342643	0.000602824
F42G8.7	-0.0407446	2.21639	2.19028	NA	NA	1	0.000307728	0.000277998
Y57G11C.14	-1.05136	2.42416	2.18927	NA	NA	0.207634	1.42879e-05	0.000139199
Y116A8A.6	-0.711404	2.21816	2.18609	NA	NA	0.621327	0.0109996	0.00869576
H34I24.3	1.74291	1.91594	2.18529	NA	NA	0.169098	0.120544	0.0426091
ZC196.3	-0.123563	1.03635	2.18169	NA	NA	0.991192	0.69481	0.0970159
T10B5.2	-0.745249	1.95065	2.18087	NA	NA	0.434437	0.0044738	0.000412477
F47F6.9	-2.44549	2.39211	2.17951	NA	NA	0.463441	0.0768653	0.0850123
Y113G7A.12	-0.183787	1.5379	2.17557	NA	NA	1	0.316204	0.042754
F08F3.6	0.949808	1.63573	2.17214	NA	NA	0.976524	0.502846	0.214559
str-116	1.04645	1.4896	2.17208	NA	NA	0.946441	0.842966	0.437598
scl-21	-1.48107	0.936999	2.17105	NA	NA	0.627979	0.71588	0.112362
fbxa-44	1.35988	1.43197	2.16971	NA	NA	0.168143	0.223851	0.0122246
T04G9.7	0.389097	3.38403	2.16948	NA	NA	1	0.00648672	0.14735
F25B3.5	1.17488	1.99244	2.16918	NA	NA	0.00228382	2.30064e-07	5.79082e-09
fbxa-88	1.47943	2.40228	2.1672	NA	NA	0.370102	0.040778	0.079106
W03F9.9	1.35232	1.72444	2.1649	NA	NA	0.52731	0.331552	0.111398
fbxa-153	0.541194	1.77739	2.16377	NA	NA	0.690401	0.0331057	0.00237463
cyp-13A7	0.729411	1.87746	2.16314	NA	NA	0.919404	0.240403	0.112426
C46H11.6	-2.24964	2.05317	2.15969	NA	NA	0.0474134	0.00858654	0.00265991
F13H8.8	0.0627918	1.68214	2.1564	NA	NA	1	0.030217	0.000728808
fbxb-87	-0.940838	0.787454	2.15528	NA	NA	0.961133	0.909645	0.146649
F38B2.3	2.1452	0.735374	2.15437	NA	NA	0.229756	0.909645	0.146434
T15B7.14	-2.46648	2.15188	2.15398	NA	NA	0.0260095	0.00812114	0.00563502
Y94H6A.2	1.4486	1.85609	2.15337	NA	NA	0.0223948	0.00901764	0.000706867
T16G1.7	0.40565	1.54187	2.15176	NA	NA	0.595809	0.00163463	1.9964e-07
fbxa-189	1.19622	1.70598	2.14971	NA	NA	0.0204835	0.00263524	1.40482e-05
Y51H7C.12	0.0882338	1.37403	2.14906	NA	NA	1	0.789863	0.258364
T26E3.7	0.626133	2.04006	2.14761	NA	NA	0.982075	0.25204	0.146703
W02B8.4	0.892623	0.972656	2.14658	NA	NA	0.726677	0.694457	0.0839134
his-38	0.0272503	1.71962	2.14605	NA	NA	1	0.0270809	0.000990502
K10G4.3	1.03352	1.45261	2.14579	NA	NA	0.229086	0.0869266	0.000941819
Y45F10D.16	-0.728233	1.79625	2.14423	NA	NA	0.768616	0.31639	0.132156
srh-46	1.19253	1.29017	2.14309	NA	NA	0.526852	0.510354	0.0839431
sma-6	0.793395	1.45548	2.14295	NA	NA	0.00766695	5.43241e-07	7.13326e-15
C07G1.7	1.32568	2.8907	2.14258	NA	NA	0.946441	0.265074	0.408732
gst-44	0.435272	1.90059	2.13981	NA	NA	0.865203	0.0579781	0.013873
Y69A2AR.9	-4.7042	2.17467	2.13759	NA	NA	3.21068e-07	0.000297199	0.00025356
tbx-36	1.31945	1.86585	2.13669	NA	NA	0.565758	0.343646	0.146811
K09F6.11	2.24841	1.70372	2.13641	NA	NA	0.0438099	0.273788	0.069757
C53B7.2	-3.16052	2.52616	2.1363	NA	NA	0.00555787	0.000308968	0.00430836
acdh-4	-0.23231	2.07091	2.13598	NA	NA	0.865144	9.00347e-05	2.69809e-05
Y32H12A.1	2.19472	1.63914	2.13179	NA	NA	0.365088	0.583395	0.315416
col-120	-4.85932	2.77671	2.13068	NA	NA	1.11653e-40	8.77163e-24	1.88471e-13
D2063.4	-1.89103	1.97666	2.12748	NA	NA	0.0507783	0.00936729	0.00241538
C52A10.2	1.88108	1.96841	2.12512	NA	NA	0.00211029	0.0109753	0.00314719
srb-15	-0.279936	1.48884	2.12455	NA	NA	1	0.930506	0.665997
Y51H4A.13	-1.79698	2.16207	2.12434	NA	NA	0.00527803	5.6413e-05	6.55674e-05
F26A1.7	-0.279936	1.51553	2.12242	NA	NA	1	0.930506	0.665997
H12I13.6	-0.493547	2.28094	2.12053	NA	NA	0.733695	0.00189919	0.00430836
R12B2.7	1.2434	1.80621	2.12029	NA	NA	0.946441	0.842658	0.665997
Y73B3A.21	2.95799	2.06479	2.12029	NA	NA	0.353653	0.729986	0.665997
his-4	0.396188	1.9117	2.11864	NA	NA	0.816415	0.0256169	0.00586241
R05A10.5	2.06563	1.40308	2.11835	NA	NA	0.212883	0.512101	0.15442
Y51H7C.1	-3.8314	2.309	2.11834	NA	NA	8.41804e-35	1.33782e-16	1.04339e-13
C03A7.13	0.667747	1.51056	2.11782	NA	NA	0.695041	0.187734	0.0160428
F48C5.1	0.4047	0.843742	2.11629	x	x	0.534174	0.148176	1.25223e-08
F22E5.12	2.06429	1.17554	2.11472	NA	NA	0.365183	0.889152	0.258364
tag-348	1.04544	1.51097	2.11458	NA	NA	0.605029	0.352385	0.0692824
W01D2.5	-0.0965742	1.29197	2.11133	x	0	0.905499	3.86961e-05	8.53432e-14
F52F12.9	-1.91885	2.30454	2.11088	NA	NA	0.408625	0.0604805	0.0903294
Y39A3A.2	0.193822	0.385372	2.1068	NA	NA	1	1	0.132378
F41C3.6	0.52228	0.870688	2.10508	NA	NA	0.937001	0.694094	0.0721961
his-6	0.223851	1.769	2.10391	NA	NA	0.895869	0.00923557	0.000359637
F49H12.2	0.747655	1.65716	2.10305	NA	NA	1	0.583084	0.377898
H02F09.2	2.84393	2.07484	2.10089	NA	NA	0.141728	0.442185	0.377898
C01G10.4	-0.803631	0.474178	2.10023	NA	NA	0.430781	0.837508	0.00239792
ZK849.5	-1.51369	1.93803	2.10014	NA	NA	0.0297945	0.00122652	0.000163657
C54F6.5	1.41069	0.680282	2.09873	NA	NA	0.217994	0.780043	0.0310742
Y47D3A.5	-1.95669	2.11074	2.09593	NA	NA	0.0613304	0.00623631	0.00483584
ZK484.6	-1.18462	1.83909	2.08991	NA	NA	0.108201	0.00539148	0.000408143
W03C9.1	-1.14639	1.88168	2.08822	NA	NA	0.328581	0.0204897	0.00429916
R12B2.3	0.725738	2.54187	2.08655	NA	NA	0.717968	0.0117063	0.0485107
K08D10.10	0.951628	1.39485	2.08626	NA	NA	0.0146178	0.000499068	1.02679e-09
H08J19.1	1.77473	1.54224	2.0856	NA	NA	0.856906	0.930506	0.665739
srx-77	2.7391	1.04732	2.0856	NA	NA	0.43765	1	0.665739
C40A11.3	0.626243	1.20203	2.0842	NA	NA	0.919404	0.647186	0.154606
F48F5.1	-2.0813	2.15015	2.08413	NA	NA	4.51765e-06	9.44891e-08	2.54155e-07
Y38F2AR.10	-1.18627	1.3424	2.08379	NA	NA	0.47762	0.384878	0.0474968
C03D6.6	-0.848021	2.06555	2.08319	NA	NA	0.353653	0.000954674	0.000592009
W01B11.1	-0.589662	2.43292	2.08006	NA	NA	0.891092	0.0576036	0.112177
Y105C5B.20	1.92943	1.70466	2.07814	NA	NA	0.763086	0.842658	0.667006
btb-2	-3.80687	2.20851	2.07767	NA	NA	1.25706e-07	2.73261e-05	0.000100521
fbxb-98	0.639874	0.967835	2.07606	NA	NA	1	1	0.667006
str-180	0.340251	1.71034	2.07576	NA	NA	0.98961	0.123201	0.0236675
Y41D4B.15	-0.0349372	1.4769	2.07464	NA	NA	1	0.451955	0.143922
R05D8.9	1.13464	1.98058	2.07457	NA	NA	0.402506	0.0547428	0.025316
F31F6.8	0.980323	0.857913	2.07388	x	x	0.100578	0.311998	3.9054e-05
asm-3	1.04572	0.694636	2.07358	NA	NA	0.122002	0.584601	0.000329729
M05B5.6	1.37037	1.76948	2.07275	x	x	0.000720438	9.49854e-05	6.57175e-07
W03A5.1	-1.7645	2.15688	2.07163	NA	NA	1.05262e-05	2.22347e-09	1.38693e-08
F54H5.3	-0.205183	2.03434	2.07022	NA	NA	1	0.0835382	0.0689923
sre-50	-0.225271	1.94109	2.07015	NA	NA	1	0.417041	0.377898
Y39B6A.25	-1.65258	2.27563	2.06886	NA	NA	0.00252897	8.70694e-07	1.61583e-05
F57E7.1	0.697751	1.29703	2.06434	NA	NA	0.666861	0.272322	0.0139512
oac-31	1.17589	1.76552	2.06324	NA	NA	0.00215123	1.16583e-05	4.32771e-08
C25G4.7	-0.0946766	2.19505	2.06284	NA	NA	0.968177	0.00401526	0.00613976
K08E4.2	0.214232	1.46504	2.06183	x	x	0.803093	0.00282525	5.29986e-07
C15C8.8	1.08425	1.85252	2.0617	NA	NA	0.694329	0.275763	0.144105
C45B11.2	0.452117	0.864491	2.06034	NA	NA	0.976524	0.640327	0.0344691
ant-1.44	-2.27305	2.26041	2.06004	NA	NA	3.82409e-15	2.07261e-15	1.6084e-12
C34E10.9	-1.6315	1.5984	2.05932	NA	NA	0.455701	0.229119	0.0486021
F44F4.3	-0.171882	1.8886	2.0586	NA	NA	0.916089	0.0356442	0.0113002
try-6	0.20652	1.69084	2.05586	NA	NA	0.969768	0.0549637	0.00614425
C31H5.7	0.500405	1.75206	2.05459	NA	NA	0.946441	0.215589	0.0839238
R10F2.6	-0.536632	1.92478	2.05444	NA	NA	0.341113	2.96705e-07	1.42643e-08
F53A9.7	0.364685	1.44117	2.05083	NA	NA	0.575131	4.61798e-05	9.31091e-11
C29F5.3	-1.22144	1.77294	2.04997	NA	NA	0.140257	0.0072713	0.000494462
phy-3	-2.72921	2.36295	2.0496	NA	NA	0.0209893	0.00310476	0.0136336
srsx-40	-1.09095	1.82705	2.04893	NA	NA	0.916089	0.502846	0.377898
srt-70	-0.360126	0.967835	2.04436	NA	NA	1	1	0.666231
math-17	-0.453585	1.40917	2.04223	NA	NA	1	0.930506	0.666231
VB0393L.2	1.26151	1.98495	2.04223	NA	NA	0.946441	0.730327	0.666231
F46F2.4	2.02315	0.382518	2.0401	NA	NA	0.764128	1	0.666231
srv-16	1.16181	1.11301	2.03965	NA	NA	0.618351	0.719959	0.17919
srd-65	2.54621	2.72623	2.03582	NA	NA	0.521285	0.324505	0.666218
Y75B7B.2	-2.15151	1.96253	2.03466	NA	NA	0.579951	0.240813	0.179848
try-8	1.14906	1.68045	2.03255	NA	NA	0.815885	0.44243	0.242988
C54D2.6	0.673163	-0.293257	2.02957	NA	NA	0.919404	0.98057	0.1793
C28D4.10	0.603149	1.37526	2.0271	NA	NA	0.982053	0.586111	0.242262
B0511.11	0.420188	1.57598	2.02683	NA	NA	0.807739	0.0382943	0.00110257
F22E5.7	0.596421	1.77405	2.02605	NA	NA	0.982075	0.399755	0.20621
T08A9.6	-0.3862	2.19437	2.02584	NA	NA	1	0.504273	0.411841
ZK945.4	0.825572	1.31495	2.02566	NA	NA	0.392032	0.15988	0.00250046
cyp-13A11	-0.223003	0.00737306	2.02507	NA	NA	1	1	0.377898
6R55.2	2.46601	2.63712	2.02398	NA	NA	0.43765	0.265074	0.411841
C54C6.7	2.17333	2.18896	2.02147	NA	NA	0.0267605	0.0504795	0.0776709
Y40B10B.1	2.31107	-0.0917241	2.01965	NA	NA	0.0204632	1	0.0887285
srz-24	1.71008	2.38454	2.01839	NA	NA	0.763738	0.414477	0.411777
ZK1248.9	-0.995502	-0.597554	2.01627	NA	NA	0.961133	0.956271	0.206252
sre-42	2.58135	2.91959	2.01522	NA	NA	0.179864	0.0637776	0.315416
grd-11	1.02337	1.2793	2.01413	NA	NA	0.0968299	0.0721932	0.00020735
sre-46	-0.373394	1.8484	2.01361	NA	NA	1	0.842658	0.664068
pqn-60	-0.00800379	0.602864	2.01322	NA	NA	1	0.504039	8.26055e-07
Y58A7A.3	0.499114	0.905292	2.01249	NA	NA	0.264979	0.0226029	2.0133e-11
fbxa-24	0.460224	0.679809	2.00894	NA	NA	0.38344	0.240403	2.53224e-09
C54E10.1	1.19435	-0.512721	2.00541	NA	NA	0.946441	1	0.665898
F29C12.6	1.35354	0.967835	2.00541	NA	NA	0.946441	1	0.665898
F40G12.5	2.62238	-0.512721	2.00541	NA	NA	0.43765	1	0.665898
clec-1	0.0495559	0.740053	2.00436	NA	NA	0.993356	0.0291605	1.55094e-13
F56C9.11	0.136134	1.44841	2.00353	NA	NA	0.946441	0.00227509	5.84234e-07
F22F7.3	2.75345	1.99284	2.00279	NA	NA	0.000967499	0.089056	0.0637343
ZK550.1	-3.65051	2.28815	2.00266	NA	NA	0.0706955	0.0280265	0.0526515
far-3	2.25558	1.6431	2.00188	NA	NA	2.27721e-18	2.37887e-06	7.64435e-10
F55B12.2	1.05664	1.48087	2.00107	NA	NA	0.816602	0.505175	0.242253
lam-3	1.25577	1.20326	1.99847	NA	NA	4.27081e-05	0.00153647	1.47062e-10
pes-23	-2.06829	2.16275	1.9962	NA	NA	0.799117	0.198741	0.173087
srw-85	0.70651	1.3983	1.99603	NA	NA	0.692769	0.286581	0.0418904
math-37	1.39629	1.5893	1.99462	NA	NA	0.218316	0.182438	0.0362468
F16B4.2	0.900949	1.62986	1.99416	NA	NA	0.276183	0.0376664	0.00247281
srh-148	0.479479	0.823437	1.99381	NA	NA	1	1	0.4111
ZC196.2	1.42902	1.15008	1.99367	NA	NA	0.370102	0.55161	0.0887285
W03D8.2	-0.60717	1.98135	1.99328	NA	NA	0.390636	4.67402e-05	2.8739e-05
F27E5.5	1.62649	1.64525	1.99311	NA	NA	0.092318	0.159983	0.0464659
asp-11	0.967373	0.43602	1.99292	NA	NA	0.616417	1	0.109367
arg-1	-0.668644	0.752776	1.99191	NA	NA	1	1	0.411084
F16H11.3	-0.3862	1.19359	1.99191	NA	NA	1	0.930666	0.411084
T22H9.3	-2.365	2.14648	1.98985	NA	NA	5.31681e-14	1.43363e-12	1.49825e-10
col-112	-4.21175	2.15026	1.98862	NA	NA	1.76524e-109	3.77823e-12	1.70678e-10
srx-108	1.41098	1.72643	1.98775	NA	NA	0.770975	0.502846	0.377898
oac-17	0.600722	1.98908	1.98765	NA	NA	0.729935	0.0370372	0.0297391
W06D4.3	-0.575428	1.50622	1.98627	NA	NA	0.71774	0.169284	0.0210117
lipl-1	2.02507	1.82676	1.98316	NA	NA	6.226e-08	0.000194783	2.07937e-05
Y38E10A.26	-1.02949	1.17718	1.98312	x	x	0.0816578	0.0809403	2.94313e-05
C09G5.7	-1.74933	1.82903	1.98114	NA	NA	0.00839275	0.00499426	0.000913509
Y38E10A.16	0.126908	0.976256	1.97878	x	0	1	0.721202	0.16079
T24E12.5	0.436346	1.29505	1.97773	NA	NA	0.611618	0.0299	2.2878e-05
Y97E10AR.8	-1.65964	1.97028	1.9771	NA	NA	0.495795	0.16288	0.128643
F44F1.4	0.540086	2.05199	1.9765	NA	NA	0.521285	0.000213606	0.000353043
F21H7.3	0.747655	1.97089	1.97554	NA	NA	1	0.417191	0.355595
his-5	0.0426656	1.71296	1.97364	NA	NA	1	0.106897	0.0297134
M60.7	0.438801	1.03286	1.97115	NA	NA	0.552152	0.190067	0.000137745
smf-2	1.32568	1.70423	1.96987	NA	NA	0.946441	0.842658	0.665379
K09F6.4	1.28014	1.65552	1.9692	NA	NA	0.0071709	0.00225544	4.73364e-05
ins-7	-0.795606	0.0630423	1.96834	NA	NA	0.291082	1	0.000114415
C23H5.12	-0.171141	0.382518	1.96762	NA	NA	1	1	0.665379
srz-47	1.98803	1.40969	1.96762	NA	NA	0.763738	0.930506	0.665379
C10G8.2	2.0057	1.43585	1.96762	NA	NA	0.763738	0.930506	0.665379
pes-8	-2.47731	2.1483	1.96702	NA	NA	8.03666e-18	3.85216e-14	1.14376e-11
B0496.2	0.242656	1.66337	1.96696	NA	NA	1	0.182941	0.0548503
T13G4.6	1.47679	-0.525125	1.96653	NA	NA	0.770975	0.936775	0.355817
Y54E2A.5	-1.44079	2.1346	1.96577	NA	NA	0.205285	0.00448618	0.00867253
T21E3.2	-2.11142	1.63553	1.96544	NA	NA	0.579951	0.39981	0.196167
sri-20	1.18653	1.90215	1.96513	NA	NA	0.884587	0.442185	0.377898
C39B5.5	-2.13869	2.04218	1.96365	NA	NA	4.81284e-07	1.18122e-07	4.64676e-07
srsx-7	1.68037	1.10891	1.96305	NA	NA	0.502808	0.889143	0.315416
C05B5.1	-0.668644	2.91664	1.96299	NA	NA	1	0.170014	0.410421
C15F1.5	-0.439421	2.00586	1.96287	NA	NA	0.646876	0.00115292	0.00122089
C52E12.6	-1.63094	1.96849	1.96284	NA	NA	0.0372444	0.00280387	0.00195302
oac-18	0.42122	2.50877	1.95799	NA	NA	0.946447	0.0155791	0.0738027
R13H4.3	0.485992	0.121453	1.95643	NA	NA	0.202482	0.936412	2.63179e-12
clec-147	-1.80652	1.59242	1.95615	NA	NA	0.799117	0.44243	0.206698
Y37A1B.7	0.446797	1.4739	1.95572	x	x	0.194746	6.65836e-08	4.11703e-13
F48F5.2	-1.56006	2.4291	1.95556	NA	NA	0.459191	0.0321546	0.101561
cyp-13A8	-1.33605	0.996705	1.95443	NA	NA	0.563111	0.669136	0.124442
T05H4.15	1.12431	0.852673	1.95362	NA	NA	0.106793	0.458101	0.00235903
Y45F3A.1	0.383704	1.6708	1.95217	NA	NA	0.621327	0.000354437	4.84527e-06
his-63	0.151873	0.717605	1.95213	NA	NA	1	0.811347	0.14793
pqn-66	0.0203862	1.58074	1.95158	NA	NA	1	0.139898	0.0310085
F13A7.12	-0.244333	1.75655	1.9504	x	0	0.864624	0.00334196	0.000366174
C55A6.11	0.346583	1.68103	1.94999	NA	NA	0.798728	0.0849965	0.0175263
cyp-32B1	0.511283	1.02266	1.94999	NA	NA	0.417557	0.0782725	1.97289e-06
R09D1.12	1.31933	0.984399	1.94933	NA	NA	0.548298	0.71588	0.168554
F25H5.2	-1.01908	1.9521	1.94833	NA	NA	0.26359	0.00303271	0.00225366
F53A9.2	0.00948795	2.45759	1.94825	NA	NA	1	0.00088131	0.01995
F35E12.4	0.730684	1.23703	1.94763	NA	NA	0.671897	0.385644	0.052132
nhr-231	0.922574	1.6388	1.94716	NA	NA	0.478785	0.104055	0.026392
clec-17	1.55805	0.915247	1.94632	NA	NA	7.51719e-07	0.0658727	4.45629e-08
nhr-56	0.335998	1.26285	1.94356	NA	NA	0.632789	0.00542257	1.68866e-07
col-38	-3.96436	2.01886	1.94318	NA	NA	3.55764e-105	7.56135e-10	4.84227e-09
C44B12.5	-4.20398	3.21811	1.94021	NA	NA	4.18621e-14	1.89597e-20	8.70512e-06
C28C12.4	0.0335126	1.2253	1.93448	NA	NA	1	0.00105979	9.43298e-10
K02H11.9	0.592491	1.33419	1.93371	NA	NA	1	0.789679	0.377898
C05A9.3	2.73029	1.79762	1.93085	NA	NA	0.179705	0.502846	0.377898
dao-4	-5.14802	2.32503	1.92489	NA	NA	1.71645e-41	6.30365e-16	1.86422e-10
K10D3.6	0.620082	1.78466	1.92286	NA	NA	0.224781	5.32333e-06	4.44828e-07
R155.4	-3.65829	1.97507	1.92259	NA	NA	0.044402	0.0607426	0.046956
Y62H9A.12	-1.06667	1.74334	1.92112	NA	NA	0.276183	0.0371909	0.0090626
F44B9.9	-0.00335457	1.63398	1.9169	NA	NA	1	0.226268	0.0857741
Y43C5A.4	-0.505847	2.13386	1.9156	NA	NA	0.790332	0.0241471	0.0433915
col-121	-1.41405	1.00666	1.91462	NA	NA	0.916089	0.974282	0.355595
ZK973.8	-1.25244	1.9739	1.91362	NA	NA	0.0503441	0.000218648	0.000281052
F49C12.5	0.323173	3.6991	1.91292	NA	NA	1	5.1524e-05	0.169569
C07D10.5	0.376629	1.38983	1.91195	NA	NA	0.611618	0.00608637	6.51208e-06
F57H12.5	-1.55085	1.69694	1.91166	NA	NA	0.0531173	0.0193035	0.00276048
Y39E4B.13	-1.24611	1.63822	1.91104	NA	NA	0.251284	0.066697	0.012214
F53G2.1	-0.520521	-0.211115	1.90887	NA	NA	1	1	0.315416
C25F9.12	0.917793	1.45241	1.90815	NA	NA	0.302412	0.0791358	0.00442314
F57A10.2	-2.83108	2.04591	1.90779	NA	NA	0.28313	0.0944469	0.0963823
F48E3.4	-1.06806	2.68677	1.9069	NA	NA	0.458699	0.000650779	0.0394478
dhs-26	0.604568	0.574403	1.90527	NA	NA	0.830643	0.857029	0.0943663
C25F9.2	0.25215	2.42976	1.90439	NA	NA	1	0.120803	0.242988
Y22D7AR.2	-0.320786	1.52899	1.90439	NA	NA	0.756227	0.0313616	0.00140317
F41H10.5	-0.590939	1.84062	1.90383	NA	NA	0.432484	0.00032703	0.000117042
Y22D7AR.1	-0.532956	1.82103	1.89982	NA	NA	0.913912	0.200822	0.109534
C07A9.8	0.156404	1.33701	1.89837	NA	NA	0.920996	0.0242383	7.75168e-05
Y54G2A.38	-0.0909504	1.51604	1.89696	NA	NA	1	0.930506	0.787258
K12D12.4	-1.10097	1.79287	1.89513	NA	NA	0.278504	0.0344335	0.0134353
C44E4.2	1.0089	1.10776	1.89481	NA	NA	0.358478	0.406023	0.0280418
Y22D7AR.3	-0.373394	0.515527	1.89446	NA	NA	1	1	0.787258
F37D6.3	0.518409	1.24262	1.89328	NA	NA	0.905499	0.504998	0.107424
T08A9.13	0.192433	0.860937	1.89285	NA	NA	1	0.640254	0.0671388
F53F8.3	0.45336	0.787012	1.89284	NA	NA	1	0.96326	0.355595
Y25C1A.2	-0.0735793	0.916246	1.89236	NA	NA	1	0.54691	0.0304315
C47E8.11	-1.36588	1.61891	1.89205	NA	NA	0.30763	0.108831	0.0252077
T14E8.2	-0.453585	1.23541	1.8918	NA	NA	1	0.889143	0.35567
T24A6.7	1.90292	2.01262	1.8895	NA	NA	0.427786	0.374481	0.377898
C28C12.11	0.602572	2.01293	1.8878	NA	NA	0.493484	0.000230399	0.000589332
cyp-33C8	0.632658	1.12765	1.88379	NA	NA	0.143233	0.004686	8.48691e-09
H20E11.2	0.957782	1.73287	1.88081	NA	NA	0.392252	0.0566311	0.0240276
nas-28	1.18891	1.72158	1.88068	NA	NA	0.117902	0.0300357	0.00865975
col-152	-0.936849	4.03074	1.87937	NA	NA	0.657311	7.65233e-06	0.162075
F53C3.5	0.645526	1.2377	1.87803	NA	NA	0.361706	0.0728801	0.000524374
F30A10.13	0.179087	2.1844	1.87621	NA	NA	1	0.261103	0.377898
F20C5.5	1.74541	1.47857	1.87593	NA	NA	0.249278	0.408882	0.171137
M01A8.1	-0.681144	1.03497	1.87512	x	x	0.36905	0.19743	0.00032004
C47F8.5	1.50544	1.58787	1.87484	NA	NA	0.174437	0.194745	0.0610547
Y62H9A.13	0.734386	1.31408	1.87393	NA	NA	0.678626	0.309755	0.0496119
fbxb-88	0.866357	1.14405	1.87392	NA	NA	0.619011	0.446204	0.0613196
col-184	-2.78332	2.35204	1.87263	NA	NA	2.43632e-14	1.64762e-13	4.75594e-08
twk-45	-0.347638	1.37603	1.87165	NA	NA	0.856906	0.417041	0.136321
str-31	-0.47222	0.311818	1.87119	NA	NA	0.638987	0.909645	0.00512996
D1086.7	-3.51261	3.00715	1.86748	NA	NA	0.10177	0.00065662	0.0775591
fbxc-48	-2.07656	1.95835	1.86697	NA	NA	0.00738914	0.0036457	0.00502811
srh-178	2.92421	0.788193	1.86308	NA	NA	0.224857	1	0.66795
nhr-187	-0.0124222	-0.114097	1.86081	NA	NA	1	1	0.119728
clec-74	1.12963	2.05868	1.86053	NA	NA	0.695173	0.209216	0.264873
clec-125	1.12826	2.20745	1.86016	NA	NA	0.414457	0.0191866	0.057035
str-138	1.08638	1.76874	1.85945	NA	NA	0.884587	0.417191	0.377898
C09E7.5	0.817649	1.48884	1.85381	NA	NA	1	0.930506	0.787258
C33D3.5	-0.373394	1.48988	1.85124	NA	NA	1	0.930506	0.787258
F02C9.2	-0.0909504	-0.536229	1.85124	NA	NA	1	1	0.787258
srg-42	-0.0909504	1.04803	1.85124	NA	NA	1	1	0.787258
T28D9.9	-1.80597	2.05315	1.84979	NA	NA	0.499423	0.142308	0.161277
srg-19	-0.373394	0.462709	1.84867	NA	NA	1	1	0.787258
gcy-5	1.45312	1.07002	1.84864	NA	NA	0.326456	0.546695	0.124594
ZC196.1	0.39104	1.49552	1.84712	NA	NA	0.996341	0.399755	0.195353
B0303.16	1.66237	1.32291	1.84687	NA	NA	0.324492	0.512057	0.225668
C47D2.1	-0.10284	1.49633	1.84577	NA	NA	0.963481	0.000876006	5.42951e-06
cpg-3	-0.530641	1.7865	1.84419	NA	NA	0.437145	0.000197458	6.20934e-05
Y2H9A.6	-0.887937	0.755018	1.84167	NA	NA	0.582522	0.653503	0.0403521
Y69A2AR.8	-2.18101	1.56032	1.83817	NA	NA	0.053475	0.125666	0.0286184
F35F11.2	-1.38643	1.69977	1.83799	NA	NA	0.249263	0.0758502	0.0286369
Y62H9A.11	1.36426	1.4883	1.83795	NA	NA	0.772009	0.583644	0.377898
M117.3	1.17873	1.95544	1.83683	NA	NA	0.816602	0.343646	0.338528
F02C9.1	-2.60727	1.97095	1.83648	NA	NA	0.130323	0.0639995	0.0750827
C29F9.6	0.450112	1.37925	1.83642	NA	NA	0.502787	0.00191056	2.20701e-06
F57B1.1	1.2394	1.57582	1.83602	NA	NA	0.634266	0.505175	0.394907
vit-2	-2.16953	1.70202	1.8354	NA	NA	6.18286e-16	4.2321e-09	1.57508e-10
T21C12.8	-2.14339	2.16713	1.83526	NA	NA	0.0862404	0.0124727	0.0414969
oac-6	0.35792	1.63263	1.83494	NA	NA	0.565295	1.90865e-05	5.26493e-07
T05E12.3	-2.02549	1.50134	1.8349	NA	NA	0.408931	0.371795	0.15406
phat-5	1.45959	-0.272674	1.83144	NA	NA	0.0201736	0.909645	0.00865107
calpain	0.879006	1.19867	1.8303	NA	NA	0.0615748	0.0217053	1.17075e-05
F49D11.6	0.439595	1.97711	1.82975	NA	NA	0.531741	1.01546e-05	7.07544e-05
F13E9.14	0.229553	0.732436	1.82954	NA	NA	1	0.696983	0.0383687
srh-282	0.331356	1.574	1.8293	NA	NA	1	0.843916	0.667238
sre-36	1.77297	1.51096	1.8293	NA	NA	0.764537	0.843224	0.667238
kin-23	1.88889	0.141053	1.82806	NA	NA	0.379639	1	0.338431
F59A6.10	-0.325908	0.784424	1.82783	NA	NA	1	0.96326	0.434652
Y71A12B.10	0.424771	1.93111	1.82663	NA	NA	0.856906	0.0446336	0.0496245
fbxa-30	0.584802	1.56565	1.82524	NA	NA	0.763738	0.133895	0.0395668
Y9D1A.1	0.901064	1.1609	1.82522	NA	NA	0.237231	0.15255	0.00191616
F45C12.16	1.40732	0.166395	1.82504	NA	NA	0.856906	1	0.667187
str-153	1.73276	0.752067	1.82504	NA	NA	0.763738	1	0.667187
F42E8.1	-0.452186	1.15172	1.82482	NA	NA	0.770975	0.478834	0.0707948
chil-8	1.90499	1.5655	1.82224	NA	NA	0.272239	0.460404	0.242714
W03B1.3	1.73784	1.80842	1.82207	NA	NA	0.00298276	0.0128736	0.0082474
T09B4.3	0.15263	1.8968	1.82174	NA	NA	1	0.0490028	0.0452684
F23D12.10	0.63936	1.50854	1.82107	NA	NA	0.919352	0.451956	0.264731
ZK792.7	0.191133	0.582356	1.82069	x	0	0.838702	0.369094	1.66367e-07
Y73B6BL.22	-0.253704	1.49442	1.82045	NA	NA	0.991192	0.461008	0.243881
cyp-34A6	1.0529	1.43756	1.81974	NA	NA	0.123524	0.0699857	0.00539679
F48F7.3	0.353559	1.38306	1.81961	NA	NA	0.993568	0.269303	0.0605404
nhr-141	1.05283	1.45797	1.81936	NA	NA	0.188643	0.061604	0.00601087
meg-2	-0.384648	1.69624	1.8186	NA	NA	0.948486	0.193506	0.0905454
R03G5.7	1.06779	1.14204	1.81768	x	x	0.0157271	0.04771	3.06561e-05
Y57G11B.5	-1.45358	3.56956	1.815	NA	NA	0.916089	0.0132112	0.355427
Y17D7B.2	0.223966	0.0990744	1.81471	NA	NA	1	1	0.184531
T28F12.1	-0.947865	1.76245	1.81429	NA	NA	0.587489	0.0942701	0.0568641
lgc-19	1.27828	-0.116591	1.81372	NA	NA	0.463644	0.996846	0.184531
C31H5.5	0.0539805	0.828485	1.81259	x	x	1	0.307424	0.000249717
fbxb-65	2.75022	2.06584	1.81198	NA	NA	0.43765	0.729986	0.786967
clec-135	-0.171141	0.381455	1.81177	NA	NA	1	1	0.787258
C27A2.7	-0.0310326	1.63937	1.81123	NA	NA	1	0.399755	0.306
F47B7.5	2.32692	2.68071	1.80934	NA	NA	0.61599	0.414447	0.786936
sra-32	2.3417	0.516552	1.80669	NA	NA	0.61599	1	0.786936
frm-10	0.420606	1.0822	1.8045	x	x	0.205487	0.00013508	2.21313e-11
cpt-3	-0.0467607	0.791072	1.80215	NA	NA	1	0.613955	0.0301372
Y51H7C.8	-1.417	1.6831	1.80215	NA	NA	0.626145	0.31639	0.168959
F26A1.8	-0.431758	1.50358	1.80039	NA	NA	0.724064	0.0529942	0.00657256
R03G5.6	0.971724	1.35079	1.80031	NA	NA	0.364726	0.19771	0.0264501
efn-3	-0.864186	2.25119	1.7995	NA	NA	0.961133	0.18345	0.338736
rpl-7	-0.181901	1.65873	1.7995	NA	NA	0.916089	5.90245e-05	5.64579e-06
K04F1.1	-1.17114	1.22044	1.79788	NA	NA	0.916089	0.889143	0.435079
E01G4.6	-4.11538	1.95119	1.79719	NA	NA	2.87396e-113	7.47625e-09	1.14783e-07
str-155	-0.3862	2.00538	1.79472	NA	NA	1	0.478828	0.666742
C33E10.1	0.146872	1.5953	1.79431	NA	NA	1	0.363239	0.243224
Y38F2AL.6	2.41609	0.753484	1.79254	NA	NA	0.43765	1	0.666735
caltractin	0.014233	0.972669	1.79171	NA	NA	1	0.0720933	5.46335e-06
K09F6.6	1.18618	1.13057	1.7902	NA	NA	0.00995612	0.0670182	0.000115353
T27C5.12	1.83597	1.59542	1.78991	NA	NA	0.213863	0.376893	0.184567
clec-145	0.765418	0.777434	1.78969	NA	NA	0.617979	0.680758	0.0444146
ZC53.1	1.41261	1.38243	1.78662	NA	NA	0.28575	0.345537	0.104128
col-175	-5.37899	1.88524	1.78624	NA	NA	2.26647e-133	2.47787e-11	4.11187e-10
gpa-9	1.20192	0.975713	1.78398	NA	NA	0.440771	0.632332	0.145746
W07B8.4	2.05243	0.830043	1.78265	NA	NA	0.000170621	0.52609	0.015976
R148.7	0.765725	1.99346	1.782	NA	NA	0.247991	0.000168819	0.00119868
C35E7.1	1.72366	2.64499	1.781	NA	NA	0.100578	0.00392393	0.0903101
T08G3.13	-2.11142	0.671074	1.77953	NA	NA	0.579951	1	0.306637
nhr-172	0.46367	0.843208	1.77724	NA	NA	0.763738	0.622137	0.0346064
srj-23	0.301369	1.19916	1.77626	NA	NA	0.976524	0.41143	0.0878012
hil-8	0.808497	1.45704	1.77453	NA	NA	0.919404	0.451955	0.22743
fbxa-50	1.32213	1.5857	1.77445	NA	NA	0.361354	0.2559	0.136427
cyp-33C7	0.646858	1.21201	1.77429	NA	NA	0.130936	0.00271427	3.14817e-07
Y58A7A.4	1.09694	0.624276	1.77399	NA	NA	0.339902	0.749591	0.0529173
C33D9.8	0.753079	0.860349	1.77381	NA	NA	0.396095	0.423448	0.0049353
F36H5.8	0.694538	0.436361	1.77362	NA	NA	1	1	0.787258
F41G4.4	0.308554	1.77037	1.77297	NA	NA	1	0.343609	0.288308
F16D3.6	-0.453585	-0.616419	1.77105	NA	NA	1	1	0.787258
F16B12.5	-0.171141	1.72602	1.77105	NA	NA	1	0.842658	0.787258
ZK849.1	-2.42626	1.95308	1.7691	NA	NA	7.05689e-09	1.04439e-06	1.85193e-05
nhr-254	0.694538	-0.618545	1.76848	NA	NA	1	1	0.787258
xnp-1	0.59215	0.799538	1.7683	NA	NA	0.0774585	0.0192982	1.25843e-10
F26F2.3	-2.24612	1.81061	1.76696	NA	NA	0.5796	0.275378	0.264117
ZK1236.9	1.09231	1.35	1.76649	NA	NA	0.527013	0.408882	0.160779
R07B7.4	0.290314	1.61069	1.76528	NA	NA	0.770975	0.00496963	0.000797297
srh-17	0.743713	1.28735	1.76347	NA	NA	0.851371	0.576059	0.264646
srg-65	0.774729	2.50328	1.76345	NA	NA	1	0.504039	0.786492
ugt-4	-0.736052	1.22908	1.76304	NA	NA	0.352327	0.0611575	0.000637366
C07G1.2	0.754898	1.26395	1.76225	NA	NA	0.125748	0.0091267	1.40956e-05
C13F10.6	0.238791	0.999719	1.76101	NA	NA	0.764128	0.0155223	5.78793e-08
B0393.4	-2.55098	1.88861	1.76048	NA	NA	2.32295e-17	5.46466e-10	1.40429e-08
nhr-271	-0.425905	0.611502	1.76019	NA	NA	0.980943	0.928344	0.264027
Y43F8C.3	0.513852	1.27182	1.75914	NA	NA	0.193472	8.52507e-05	3.14919e-09
rad-50	0.438052	0.623629	1.75879	NA	NA	0.401029	0.226102	4.65425e-08
amylase	0.424264	1.5258	1.75812	NA	NA	0.381351	4.27568e-06	3.37441e-08
M04G7.2	-2.26836	1.91256	1.75701	NA	NA	0.000277377	0.000705415	0.00214643
glna-3	0.275258	1.67882	1.75683	NA	NA	0.715955	1.63759e-05	2.92287e-06
col-178	-3.43013	3.26739	1.75677	NA	NA	1.17786e-07	3.09821e-16	0.00145857
F25C8.1	-1.72987	1.49734	1.75671	NA	NA	0.405511	0.371981	0.198783
T25B2.3	1.82929	1.48875	1.75481	NA	NA	0.766129	0.842966	0.665997
Y46D2A.1	0.576694	1.36128	1.75374	NA	NA	0.421986	0.0231147	0.000610656
str-262	2.46346	0.788193	1.75256	NA	NA	0.43765	1	0.665997
math-27	0.769009	1.10176	1.75205	NA	NA	0.101766	0.0268564	7.31091e-06
chil-4	0.97027	1.35805	1.75123	NA	NA	0.65441	0.417041	0.164559
F15B10.3	-0.144384	1.87397	1.75039	NA	NA	0.946441	0.00471587	0.00836725
F28H1.1	0.96645	1.50777	1.74948	x	x	0.00296125	7.34949e-06	5.84461e-08
W02A2.9	0.415251	1.27417	1.74899	NA	NA	0.800345	0.24683	0.0347596
C52B9.11	-1.53436	2.31147	1.74805	NA	NA	0.458381	0.0467499	0.173854
C49G7.12	-0.354158	0.742094	1.74774	NA	NA	0.799843	0.499734	0.00652269
fbxa-169	-0.878668	1.39398	1.7477	NA	NA	0.417566	0.252202	0.0684726
che-11	1.16558	0.997151	1.74253	NA	NA	0.121188	0.367954	0.014155
fbxa-172	1.70291	1.32406	1.73934	NA	NA	0.502825	0.789863	0.355652
H09G03.1	0.251188	0.998477	1.73916	NA	NA	0.849528	0.186634	0.000799146
C50B8.4	0.29352	1.04558	1.73814	x	x	0.691192	0.0487782	1.75498e-05
C28G1.2	0.465018	0.263257	1.73807	NA	NA	1	1	0.21321
grl-14	0.133727	1.76511	1.73779	NA	NA	1	0.0043496	0.00368119
oac-37	-0.229986	2.10526	1.7375	NA	NA	0.855521	0.016445	0.0618362
F36D1.9	0.182563	0.909748	1.73648	NA	NA	0.909937	0.258988	0.00106223
fbxa-23	1.2111	1.46364	1.73569	NA	NA	0.634826	0.505175	0.338528
C04G2.11	2.41098	0.436361	1.73179	NA	NA	0.521285	1	0.787258
Y53G8B.3	-0.667205	1.62288	1.73022	NA	NA	0.566219	0.0550057	0.0222123
C35A11.2	0.400767	1.51899	1.72952	NA	NA	0.546313	0.000564751	2.32271e-05
R08B4.4	1.22484	2.22044	1.72915	NA	NA	0.946441	0.478142	0.787258
srx-21	-1.7561	1.07923	1.7287	NA	NA	0.404631	0.608963	0.198699
srx-44	-0.171141	0.967126	1.72649	NA	NA	1	1	0.787258
kin-14	-0.19616	1.60616	1.72587	NA	NA	0.795806	0.000195523	2.63431e-05
nas-10	2.24673	1.38305	1.72384	NA	NA	0.61599	0.930506	0.787258
gst-29	0.65939	0.863249	1.72159	NA	NA	0.404854	0.380071	0.0064805
ZK993.2	2.24211	1.44923	1.72034	NA	NA	0.148177	0.512101	0.351595
R08F11.4	0.795861	1.3936	1.71906	NA	NA	0.295129	0.0381521	0.00294355
W01A11.7	-0.079945	0.592899	1.71637	x	x	1	0.597391	0.00227057
F17C11.11	0.347997	0.9998	1.71613	NA	NA	0.384354	0.000780849	3.75791e-10
btb-10	1.49538	2.02501	1.71404	NA	NA	0.587489	0.374481	0.435128
K12H6.12	0.43626	1.17307	1.71402	NA	NA	0.538281	0.0361245	0.000133431
K04F1.13	1.01674	0.167459	1.71376	NA	NA	0.946441	1	0.665778
Y46E12BR.1	1.33444	1.31215	1.71359	NA	NA	0.236562	0.311998	0.094879
T03F1.6	0.669168	1.62655	1.71358	NA	NA	0.215492	0.000238194	6.44771e-05
T08G5.1	0.0863765	1.13204	1.71123	NA	NA	1	0.647051	0.264135
sym-5	0.288273	0.978122	1.71109	0	x	0.513399	0.00100563	4.53601e-10
C36B1.13	0.35566	0.954351	1.71063	NA	NA	0.807995	0.466249	0.0429133
his-61	-0.223767	1.21757	1.70998	NA	NA	0.885518	0.0869266	0.00250596
gst-33	0.876466	1.64899	1.70916	NA	NA	0.0828981	0.000313639	0.000115353
K08F11.1	0.659772	1.36239	1.70884	NA	NA	0.615521	0.229975	0.0567339
ZC168.2	1.27217	0.709672	1.70805	NA	NA	0.418434	0.811204	0.210865
sre-3	2.12557	1.78129	1.70767	NA	NA	0.229295	0.399755	0.394907
nhr-263	1.28748	1.1971	1.70759	NA	NA	0.349271	0.448881	0.14808
C04F12.1	0.445365	1.01869	1.7072	NA	NA	0.309428	0.00255101	5.12178e-09
C04G6.13	0.104384	1.20874	1.7072	NA	NA	1	0.461063	0.161277
ZK1055.5	1.65543	1.30605	1.70698	NA	NA	0.376106	0.576059	0.306356
C44H9.7	2.08499	0.774576	1.7068	NA	NA	0.229226	0.909645	0.394907
gcy-6	0.878983	1.34884	1.70611	NA	NA	0.911961	0.668903	0.378633
F32H2.6	0.508843	0.983229	1.70496	NA	NA	0.690326	0.412196	0.0310378
sulp-1	1.14228	1.31051	1.70374	NA	NA	0.0326784	0.0493018	0.00220299
Y71H2AM.25	0.229559	1.14202	1.70282	NA	NA	1	0.566994	0.184251
C44B9.2	-1.54397	1.76899	1.7014	NA	NA	3.15963e-05	2.27594e-06	6.8578e-06
C39B10.3	0.310578	-0.0295828	1.70132	NA	NA	0.98961	1	0.0955618
Y17D7B.3	0.854449	0.324316	1.70097	NA	NA	0.976524	1	0.355595
F54B11.4	1.20521	1.05413	1.70081	NA	NA	0.513225	0.608963	0.224435
his-32	-0.264824	0.773337	1.69886	NA	NA	0.735097	0.276019	0.00011161
mfb-1	0.487034	1.19517	1.69872	NA	NA	0.309972	0.00266542	8.22946e-07
clec-12	0.399719	0.976456	1.69838	NA	NA	0.855521	0.527131	0.0869526
Y34F4.1	0.771132	0.670225	1.69658	NA	NA	0.394133	0.616589	0.00628134
Y73B6A.6	-1.37339	1.8484	1.69522	NA	NA	0.916089	0.502846	0.516449
Lys-1	0.416077	1.30459	1.69514	x	0	0.264501	0.000728776	2.81018e-05
mab-23	1.39104	1.34708	1.69479	NA	NA	0.771454	0.789716	0.435079
ZC15.1	-0.208674	1.62852	1.69432	NA	NA	1	0.293104	0.184362
Y54F10BM.6	0.749531	0.864622	1.69333	NA	NA	0.982075	0.909645	0.378633
pme-4	0.148332	-0.192206	1.69177	NA	NA	0.969384	0.909645	0.0076438
his-31	-0.158994	1.23846	1.69143	NA	NA	1	0.262149	0.0416791
W09H1.4	-0.557168	1.00804	1.68721	NA	NA	0.913912	0.669136	0.224812
K08F9.1	1.12316	1.36006	1.68625	NA	NA	0.0801469	0.0795111	0.00895654
R09A1.2	-0.0277726	1.79784	1.68614	NA	NA	1	6.39327e-05	0.000209397
F07G11.3	-0.360126	1.74706	1.68599	NA	NA	1	0.842658	0.786628
ZK262.4	-2.49265	1.26613	1.68586	NA	NA	0.463366	0.567499	0.244509
gst-39	0.520842	0.954712	1.68539	NA	NA	0.133576	0.00354185	3.07866e-09
fbxa-187	0.792398	1.48895	1.68381	NA	NA	0.45323	0.0983109	0.0278983
Y110A2AM.4	0.873044	1.36433	1.68326	NA	NA	0.727259	0.510332	0.317337
fbxc-32	-0.360126	0.381455	1.68325	NA	NA	1	1	0.786628
srt-43	-1.66864	1.36121	1.68147	NA	NA	0.916089	0.58372	0.450696
C16D9.3	1.32568	1.96819	1.68052	NA	NA	0.946441	0.729986	0.786628
Y24D9A.7	1.71616	-0.618545	1.68052	NA	NA	0.856906	1	0.786628
rpl-43	0.441351	0.279065	1.68044	NA	NA	0.455432	0.950255	0.000857325
scl-5	-0.188907	1.29943	1.6796	NA	NA	0.830434	0.0193486	0.000342869
C30E1.6	-0.0156783	1.15905	1.67953	NA	NA	1	0.668903	0.338081
B0507.9	0.163776	0.354639	1.67876	NA	NA	1	1	0.184516
T25B6.5	0.69413	0.469578	1.67808	NA	NA	0.871894	0.938353	0.277009
srw-33	-1.66864	-0.832541	1.67793	NA	NA	0.916089	0.936775	0.450696
fbxc-55	-0.331333	-0.333778	1.67767	NA	NA	0.991192	0.990959	0.277999
math-44	0.18212	1.70795	1.67722	NA	NA	0.916089	0.0235514	0.01949
C42D4.1	-0.019988	0.378409	1.67716	NA	NA	0.999175	0.357079	2.05978e-09
F10G2.7	0.197611	1.48328	1.67391	NA	NA	1	0.207628	0.08369
C16E9.2	0.388775	1.0511	1.67237	x	x	0.481699	0.00920859	5.12766e-07
ZK1098.3	0.917011	1.08212	1.67147	NA	NA	0.0862404	0.0959053	0.000653742
C06H2.7	0.645109	1.3012	1.67099	NA	NA	0.559154	0.123201	0.0171135
T01D1.5	0.341699	0.118012	1.67056	NA	NA	1	1	0.516159
F58G1.9	0.626606	3.18753	1.66996	NA	NA	1	0.169595	0.784166
F47B10.9	0.520258	1.21737	1.66842	NA	NA	0.474431	0.0843258	0.00305006
F33H12.7	-0.606079	1.64502	1.66602	NA	NA	0.351351	0.00101394	0.000676135
dyf-14	1.00226	1.0618	1.66342	NA	NA	0.00109052	0.00262074	3.71823e-08
srg-40	2.14389	0.532827	1.66002	NA	NA	0.249982	0.963446	0.355933
T01H10.8	1.53362	0.89281	1.65908	NA	NA	2.52952e-05	0.15157	9.55279e-05
Y82E9BR.4	0.686988	1.45514	1.65693	NA	NA	0.184236	0.00109827	6.86036e-05
oac-52	-0.359782	1.42363	1.65443	NA	NA	0.771738	0.14376	0.0418786
B0457.4	-3.50102	2.10696	1.65407	NA	NA	0.146945	0.0563253	0.146919
fer-1	-1.93699	1.80657	1.65214	NA	NA	1.58117e-08	1.58244e-07	2.80091e-06
col-138	-3.76849	1.81742	1.65115	NA	NA	2.06021e-95	7.71042e-09	1.92899e-07
cdh-4	1.52021	0.676489	1.64847	NA	NA	7.05689e-09	0.111531	4.34344e-08
F47G3.3	1.18891	1.387	1.64727	NA	NA	0.00833975	0.00954498	0.000591703
Y75B7B.1	-1.23873	1.54455	1.64521	NA	NA	0.208973	0.0398389	0.0137374
K08D9.4	0.526539	1.40527	1.64502	NA	NA	0.45748	0.0092336	0.000722432
gcy-3	1.1483	1.35653	1.6442	NA	NA	0.289736	0.232654	0.0789366
T23F6.5	-0.562229	1.20402	1.64394	NA	NA	0.280445	0.010663	2.46252e-05
Y39B6A.7	0.315119	1.28753	1.64333	NA	NA	0.910584	0.230476	0.0568641
F58D12.3	0.386642	0.373923	1.64269	NA	NA	0.855521	0.91883	0.0995719
F53G2.2	0.768847	1.97822	1.64199	NA	NA	0.919404	0.240971	0.351914
C05E11.7	0.633902	0.576695	1.6413	x	x	0.229226	0.4277	5.89427e-05
Y47G7B.2	0.554819	1.70559	1.63883	NA	NA	0.681396	0.0595142	0.0550001
clec-102	-0.360126	0.381455	1.63868	NA	NA	1	1	0.786101
Y24D9A.6	0.737459	2.18881	1.63868	NA	NA	1	0.47762	0.786101
F36F12.1	0.691272	2.63474	1.6384	NA	NA	0.872192	0.0178109	0.277009
ceh-40	-0.272814	0.295426	1.63834	NA	NA	0.980943	1	0.338984
C13F10.2	-0.423245	0.780501	1.63579	x	x	0.608984	0.444868	0.00462457
col-119	-1.49264	2.50175	1.63538	NA	NA	0.22405	0.00106833	0.0759992
exopolygalacturonase	1.37407	0.619763	1.63501	NA	NA	0.370139	0.842658	0.197984
kgb-2	0.925071	1.40317	1.63423	NA	NA	0.0829675	0.0120012	0.0011709
F25E5.2	0.324355	0.88815	1.63247	NA	NA	0.628048	0.145295	0.000159974
srz-76	0.119377	0.335238	1.63006	NA	NA	1	1	0.434652
sulp-6	-1.21607	1.6178	1.62845	NA	NA	0.0113566	0.000564751	0.000329729
nhr-206	0.518452	1.06014	1.62711	NA	NA	0.545565	0.223109	0.00857655
his-18	-0.281705	1.31305	1.62681	NA	NA	0.815457	0.17752	0.0369159
F46C5.1	1.82535	1.59669	1.62658	NA	NA	1.51448e-05	0.0072249	0.00467759
Y53C10A.2	0.288838	0.683685	1.62625	NA	NA	1	0.811347	0.212779
W02D7.8	-0.553006	0.552966	1.62482	NA	NA	0.697366	0.801032	0.0949979
B0361.9	0.283984	0.372561	1.62435	x	x	0.521285	0.445489	4.28795e-09
fbxb-74	0.128983	0.534253	1.62404	NA	NA	1	0.938353	0.317658
K03D3.2	1.69924	1.26255	1.6236	NA	NA	0.144618	0.461833	0.208623
str-227	0.681195	1.1838	1.62293	NA	NA	0.981967	0.74308	0.440296
F23F12.8	0.51723	0.258057	1.62221	NA	NA	0.595061	0.909645	0.00834018
str-145	2.06617	1.11835	1.62147	NA	NA	0.427017	0.974282	0.515816
srd-5	0.658326	2.49667	1.62105	NA	NA	0.982075	0.120704	0.378633
Y105C5B.15	-0.308108	0.313039	1.62041	NA	NA	0.475491	0.647051	2.65057e-08
T01H3.5	-0.515665	1.47069	1.61934	NA	NA	0.760532	0.135217	0.0546846
srp-8	0.633982	1.15249	1.61823	NA	NA	0.521285	0.237458	0.0241486
spe-15	-0.159982	1.7595	1.61766	NA	NA	0.768053	1.29947e-09	4.70599e-08
Y111B2A.27	0.882792	0.629021	1.61699	NA	NA	0.718159	0.857096	0.234956
C30G4.6	1.1646	0.635941	1.61496	NA	NA	0.885012	0.96326	0.434916
ZC443.3	0.300795	0.93061	1.61345	NA	NA	0.511853	0.00827247	5.44743e-08
ZC13.10	0.750832	1.13502	1.61301	NA	NA	0.919404	0.647051	0.306356
Y42H9AR.5	-0.294569	-0.0410949	1.61266	NA	NA	0.770975	1	0.00659726
lgc-5	0.989864	0.849986	1.61199	NA	NA	0.912353	0.909645	0.440296
his-41	0.458162	1.054	1.61026	NA	NA	0.131526	0.0192982	1.24919e-05
ZK1055.2	-0.944217	0.196852	1.609	NA	NA	0.584447	1	0.0951152
H37A05.2	0.420872	2.17906	1.60873	NA	NA	0.800345	0.00373656	0.0650999
his-7	-0.889791	1.39761	1.60842	NA	NA	0.63158	0.305031	0.163898
fbxa-62	0.330159	1.26778	1.60483	NA	NA	1	0.647186	0.338989
T03G11.10	0.756993	0.38409	1.60372	NA	NA	0.759931	1	0.255035
F38A5.7	0.434401	1.01227	1.60195	NA	NA	0.248038	0.00094865	1.19274e-08
R07C12.4	0.419347	0.736348	1.60111	NA	NA	0.684097	0.502846	0.0112643
F25H5.8	-5.26441	2.30586	1.60002	NA	NA	9.8272e-06	0.000330839	0.0361246
K03H4.1	1.39928	0.182466	1.59818	NA	NA	0.484913	1	0.351595
T04C12.7	0.717165	1.39979	1.59775	NA	NA	0.516449	0.14631	0.0554
Y40H7A.10	-0.155405	0.697578	1.59724	NA	NA	0.816032	0.252883	1.28245e-05
C09E7.7	0.668074	1.0481	1.59611	NA	NA	0.323664	0.137859	0.00217192
Y43C5B.3	-0.372816	1.69989	1.59519	NA	NA	0.605534	0.000562133	0.00121005
glb-5	2.05866	1.46231	1.59495	NA	NA	0.325054	0.586111	0.440296
C44B12.9	-0.668644	-0.831479	1.59421	NA	NA	1	1	0.788064
nhr-175	0.934014	0.70341	1.59294	NA	NA	0.911987	0.983519	0.440296
F45D3.3	0.32829	1.15046	1.59204	NA	NA	0.285447	5.03231e-05	5.3353e-08
Y105C5A.14	0.485528	1.09496	1.59184	NA	NA	0.241531	0.00152906	2.4343e-07
ace-4	0.886691	0.780597	1.5902	x	x	0.207949	0.497101	0.0134252
his-2	-0.0600031	1.26404	1.58987	NA	NA	1	0.173876	0.0359176
Y116A8C.33	-0.0214858	1.80479	1.58945	NA	NA	1	0.00927178	0.0234259
T05B4.8	-2.49156	-2.65439	1.5875	NA	NA	0.579951	0.414077	0.351701
F44E7.3	-1.67038	1.36448	1.5844	NA	NA	0.239946	0.309781	0.145017
spe-4	-0.605187	1.73673	1.58382	NA	NA	0.185309	8.13588e-07	1.11776e-05
C25A11.1	0.627033	1.36492	1.58331	NA	NA	0.779664	0.381577	0.218474
nhr-183	0.466062	0.97413	1.5831	NA	NA	0.413568	0.0530222	5.97281e-05
srh-78	0.684635	0.449229	1.58232	NA	NA	1	1	0.51587
F19B6.3	-1.41675	1.73606	1.57957	NA	NA	0.0478412	0.00831107	0.0156757
F49D11.4	1.87352	1.56511	1.57914	NA	NA	0.280663	0.39976	0.338892
srh-217	2.08589	1.11869	1.57752	NA	NA	0.763738	1	0.894486
ZK896.1	1.39872	2.24261	1.5766	NA	NA	0.0691749	0.00193973	0.0700752
sir-2.3	0.554878	1.74416	1.57611	NA	NA	0.709076	0.0774474	0.112621
cav-2	0.298367	1.02547	1.57604	NA	NA	0.785315	0.187428	0.00582224
T05A8.6	-1.32345	1.88692	1.57595	NA	NA	0.56373	0.201078	0.256346
ZC190.6	1.07171	1.35909	1.57503	NA	NA	0.565077	0.461514	0.289282
ceh-2	0.860221	0.948213	1.57502	NA	NA	0.478785	0.510332	0.0953737
sdf-9	0.0198446	1.29764	1.57445	NA	NA	1	0.789716	0.434652
Y7A5A.10	0.817649	1.11801	1.57441	NA	NA	1	1	0.894486
F54D10.8	-0.826197	1.80412	1.57404	NA	NA	0.545675	0.0619452	0.0989047
[truncated: 14,310 more rows]

## Sheet: miRNA-seq
miRNA	Number of reads (rpm) in wild-type	Number of reads (rpm) in mir-58.1	Number of reads (rpm) in mir-80; mir-58.1	Number of reads (rpm) in mir-80; mir-58.1; mir-81-82
cel-let-7-5p	2405.25	3112.5	2299.96	9867.67
cel-let-7-3p	0.6904	1.3828	2.4154	6.7531
cel-lin-4-5p	194.684	320.628	416.115	548.286
cel-lin-4-3p	0.6904	0	0.394	1.0704
cel-miR-1-5p	0	2.42	3.1864	7.3564
cel-miR-1-3p	5139.8	7932.99	4758.25	11111.5
cel-miR-2-5p	12.4266	37.4992	18.8432	27.5424
cel-miR-2-3p	113.221	390.164	147.841	253.58
cel-miR-34-5p	133.932	405.637	386.081	591.602
cel-miR-34-3p	140.145	143.829	74.0481	224.904
cel-miR-35-5p	1.3807	2.9089	0	0.8414
cel-miR-35-3p	0	62.1689	48.7245	76.4247
cel-miR-36-5p	0	0.3457	1.4561	4.6279
cel-miR-36-3p	17.2592	60.6009	77.8974	50.0701
cel-miR-37-5p	0.6904	8.5396	1.3363	0.6365
cel-miR-37-3p	48.3259	100.796	72.1143	82.9903
cel-miR-38-5p	0	0.218	0	0.8414
cel-miR-38-3p	0	11.1813	4.6764	7.3615
cel-miR-39-5p	4.8326	21.9348	6.4921	15.7231
cel-miR-39-3p	56.6103	132.35	99.7339	159.464
cel-miR-40-5p	4.8326	0.218	0.6681	0
cel-miR-40-3p	16.5689	35.9031	18.6374	38.1067
cel-miR-41-5p	0	0.436	1.0621	1.8094
cel-miR-41-3p	0.6904	0	0.4454	0.4207
cel-miR-42-5p	0	1.6462	0.8909	3.6187
cel-miR-42-3p	0	0.6914	21.5897	5.6942
cel-miR-43-5p	0	10.5595	3.1005	2.7509
cel-miR-43-3p	115.292	97.6327	37.1906	78.8103
cel-miR-44-5p	149.12	123.557	201.736	342.487
cel-miR-44-3p	5205.38	8561.84	7101.84	17745.8
cel-miR-45-5p	8823.61	7898.5	6185.33	9435.81
cel-miR-45-3p	5205.38	8561.84	7101.84	17745.8
cel-miR-46-5p	31.757	60.126	106.478	118.682
cel-miR-46-3p	512.254	937.779	949.803	1665.28
cel-miR-47-5p	13.117	24.4513	25.5427	25.5254
cel-miR-47-3p	199.517	505.797	419.171	547.678
cel-miR-48-5p	22799.4	26971.3	38537.3	58378.8
cel-miR-48-3p	0.6904	2.7657	0.6681	2.3194
cel-miR-49-5p	62.1332	108.633	55.3005	93.572
cel-miR-49-3p	1.3807	3.1114	21.1905	10.0982
cel-miR-50-5p	583.362	1231.35	918.275	2808.22
cel-miR-50-3p	0	2.42	8.1534	8.5584
cel-miR-51-5p	202.969	220.348	193.251	416.292
cel-miR-51-3p	0	3.6611	3.2844	7.4515
cel-miR-52-5p	604.073	1103.67	981.787	2463.55
cel-miR-52-3p	1.3807	2.9837	33.752	39.6681
cel-miR-53-5p	64.2043	77.8103	66.2568	204.849
cel-miR-53-3p	0	0.3457	0	3.2856
cel-miR-54-5p	80.0828	134.123	245.617	234.179
cel-miR-54-3p	128.409	166.92	186.069	700.578
cel-miR-55-5p	0	3.8338	3.7341	5.6066
cel-miR-55-3p	1003.8	1489.06	1268.27	2237.66
cel-miR-56-5p	0	5.2166	4.706	7.5276
cel-miR-56-3p	579.22	819.68	884.365	1300
cel-miR-57-5p	5731.45	18806.7	30381.1	56482.7
cel-miR-57-3p	0	1.3828	1.4561	3.8105
cel-miR-58-5p	43.4933	0.6914	0.7365	7.8962
cel-miR-58-3p	93551.3	524.615	153.041	121.081
cel-miR-59-5p	0	0	1.1136	0.6365
cel-miR-59-3p	2570.25	1010.65	3455.42	4195.92
cel-miR-60-5p	9.6652	0.3457	2.5007	3.174
cel-miR-60-3p	75.9406	201.852	134.216	271.98
cel-miR-61-5p	9.6652	45.255	41.9579	58.7762
cel-miR-61-3p	2903.69	5698.37	4034.84	11594.2
cel-miR-62	13.8074	8.2526	9.9532	19.5667
cel-miR-63-5p	9.6652	36.2059	18.8081	38.244
cel-miR-63-3p	177.425	322.303	405.286	764.256
cel-miR-64-5p	2789.78	4385.03	5075.36	10059.1
cel-miR-64-3p	0	7.8011	14.6454	20.2864
cel-miR-65-5p	2229.89	3751.4	4127.25	8429.94
cel-miR-65-3p	6.9037	0	0.6681	0.4207
cel-miR-66-5p	9132.21	16648.9	18082.1	36615.4
cel-miR-66-3p	7.5941	0.6914	0.6167	8.5459
cel-miR-67-5p	0	8.8388	5.3791	17.5376
cel-miR-67-3p	34.5185	73.7653	44.6393	65.1
cel-miR-70-5p	40.0414	43.8743	33.9691	50.3403
cel-miR-70-3p	10673.1	12159.6	13197.6	23416
cel-miR-71-5p	4025.54	6452.03	7528.83	12257.7
cel-miR-71-3p	9.6652	16.7238	25.3522	69.1271
cel-miR-72-5p	16266.5	32611.2	28459.6	48473.3
cel-miR-72-3p	78.7021	62.154	15.4975	34.6587
cel-miR-73-5p	0	12.5272	2.4964	6.2323
cel-miR-73-3p	1169.49	2957.08	1960.95	5970.54
cel-miR-74-5p	9.6652	5.9449	45.6369	31.0789
cel-miR-74-3p	24.8533	70.795	40.5992	94.5026
cel-miR-75-5p	53.8488	21.2779	36.2353	92.2978
cel-miR-75-3p	11.0459	30.8301	23.6388	16.8889
cel-miR-76-5p	0	1.0371	0.6167	0
cel-miR-76-3p	0.6904	19.5457	19.0085	25.525
cel-miR-77-5p	0	26.2594	49.2726	120.511
cel-miR-77-3p	442.527	257.221	407.882	802.087
cel-miR-78	0.6904	2.6155	3.049	9.1909
cel-miR-79-5p	6.2133	4.5247	5.9782	15.3792
cel-miR-79-3p	133.241	222.219	196.537	428.386
cel-miR-80-5p	978.944	1480.05	6.3115	8.8137
cel-miR-80-3p	2251.98	2941.93	13.9168	21.9361
cel-miR-81-5p	8.9748	8.5848	27.5524	16.3569
cel-miR-81-3p	140371	158644	240034	2098.2
cel-miR-82-5p	0	1.3828	2.9292	2.6731
cel-miR-82-3p	64494.3	65371.7	105452	927.098
cel-miR-83-5p	6.2133	3.6532	0.6681	5.5877
cel-miR-83-3p	13.8074	1.7285	4.6595	11.3769
cel-miR-84-5p	647.566	681.104	749.922	3118.13
cel-miR-84-3p	25.5437	73.3662	56.9323	124.624
cel-miR-85-5p	6.2133	8.7202	0.5138	3.475
cel-miR-85-3p	245.081	118.424	587.079	3019.35
cel-miR-86-5p	483.259	1249.7	804.945	1997.5
cel-miR-86-3p	5.523	38.005	22.1614	41.8802
cel-miR-87-5p	8.2844	31.0791	16.495	36.9574
cel-miR-87-3p	249.223	516.465	374.612	926.358
cel-miR-90-5p	11.0459	18.1166	18.6872	22.1563
cel-miR-90-3p	1001.04	2174.19	1587.24	3272.69
cel-miR-124-5p	0	0	0	0
cel-miR-124-3p	0	0.5637	0.394	3.0062
cel-miR-228-5p	6552.3	12363.9	9963.57	17284.8
cel-miR-228-3p	31.0666	32.6841	26.8942	43.7173
cel-miR-229-5p	0	33.4145	23.0868	82.6458
cel-miR-229-3p	220.918	456.749	160.445	316.338
cel-miR-230-5p	95.9613	113.732	167.187	738.896
cel-miR-230-3p	47.6355	133.849	63.5624	116.036
cel-miR-231-5p	0	3.3069	8.1195	18.5822
cel-miR-231-3p	0.6904	25.0278	15.7257	49.8076
cel-miR-232-5p	9.6652	3.6008	5.2878	12.6705
cel-miR-232-3p	84.2251	211.826	181.039	268.033
cel-miR-233-5p	0	0.3457	0.4454	0.9679
cel-miR-233-3p	122.195	142.344	114.401	189.582
cel-miR-234-5p	0	0	0	0.6869
cel-miR-234-3p	6.9037	0.6914	0.852	4.404
cel-miR-235-5p	0	0.218	1.6444	1.2993
cel-miR-235-3p	10433.6	24058.1	19505.9	35331.6
cel-miR-236-5p	0	0	1.4047	1.273
cel-miR-236-3p	354.85	502.827	317.685	882.055
cel-miR-237-5p	5283.4	8922.27	13800	12093.5
cel-miR-237-3p	34.5185	28.3072	35.251	65.2514
cel-miR-238-5p	2.0711	7.0355	22.4525	79.9956
cel-miR-238-3p	537.107	597.159	883.117	2378.63
cel-miR-239a-5p	1066.62	1951.2	1360.49	3345.35
cel-miR-239a-3p	0	0.9094	3.1858	12.8451
cel-miR-239b-5p	17.9496	28.5709	23.588	60.4771
cel-miR-239b-3p	0	0.3457	0.1713	0
cel-miR-240-5p	14707.6	16928.1	19078.6	22547.2
cel-miR-240-3p	44.874	70.458	45.2162	80.7509
cel-miR-241-5p	28.3051	52.652	33.1711	64.3945
cel-miR-241-3p	468.761	737.556	712.145	1384.81
cel-miR-242	30.3763	73.737	61.7429	134.475
cel-miR-243-5p	27.6148	9.5986	1.953	5.0297
cel-miR-243-3p	1123.23	1646.04	2097.49	2944.2
cel-miR-244-5p	524.681	2445.26	2546.97	7871.76
cel-miR-244-3p	0	0	0.2227	0
cel-miR-245-5p	0	0	0	0
cel-miR-245-3p	4891.96	9996.12	7894.73	14661
cel-miR-246-5p	0	0.3457	0.2227	2.5591
cel-miR-246-3p	845.012	336.053	1183.26	1789.9
cel-miR-247-5p	0	0.3457	1.0276	1.2621
cel-miR-247-3p	0	55.7489	10.0857	13.2692
cel-miR-248	55.2295	267.314	224.556	609.161
cel-miR-249-5p	8.9748	0.5637	0	0.6365
cel-miR-249-3p	93.8902	98.6826	137.204	245.883
cel-miR-250-5p	98.7228	89.213	152.145	126.255
cel-miR-250-3p	617.19	721.659	740.339	1334.02
cel-miR-251	13.8074	17.9976	17.9692	31.8585
cel-miR-252-5p	45.5644	44.5314	60.3637	111.853
cel-miR-252-3p	0	0	1.0107	0
cel-miR-253-5p	0	0	0.4066	0.229
cel-miR-253-3p	243.7	409.338	806.776	1163.9
cel-miR-254	128.409	180.354	228.191	225.775
cel-miR-255-5p	0	11.6869	1.1136	4.4338
cel-miR-255-3p	0	1.9465	2.2956	9.3501
cel-miR-256	4.1422	13.4048	26.5908	13.3544
cel-miR-257	0	0.887	0	1.8986
cel-miR-258	0	0.9548	1.3659	4.404
cel-miR-259-5p	2.7615	11.7322	38.2157	125.442
cel-miR-259-3p	4.8326	1.5784	5.721	12.7483
cel-miR-260	76.631	93.8193	274.986	175.4
cel-miR-261	0	0.5413	0.394	0.3182
cel-miR-262	44.874	112.241	71.6008	195.193
cel-miR-264	0.6904	2.3078	0.4454	0.8414
cel-miR-265	0.6904	0.1955	12.5668	0.6497
cel-miR-266	0.6904	0.9548	1.182	5.4933
cel-miR-267	4.8326	20.8853	21.1264	6.5745
cel-miR-268	0	0	0.2227	1.0051
cel-miR-269	0	0.3457	0.788	7.001
cel-miR-270	0	1.1504	0.9719	0.229
cel-miR-271	0.6904	0	0.1713	0.6497
cel-miR-272	0	0	0	0
cel-miR-273	0	0	0.394	0
cel-miR-353	0	0	0.394	0
cel-miR-354	2.0711	1.9241	9.0133	12.9837
cel-miR-355	40.0414	80.2764	62.7112	134.8
cel-miR-356a	0.6904	0.9094	0.8394	2.8013
cel-miR-357-5p	0	0	0.6851	0.3182
cel-miR-357-3p	173.973	45.9573	204.452	208.25
cel-miR-358-5p	25.5437	1.7819	2.1665	4.3279
cel-miR-358-3p	0	0.3457	6.8685	14.0203
cel-miR-359	51.7777	32.852	154.194	151.389
cel-miR-360-5p	0.6904	5.6708	0	0.5472
cel-miR-360-3p	0	0.218	0	0.3182
cel-lsy-6	0	0.6914	1.1136	1.273
cel-miR-392-5p	0	11.7009	2.0044	6.3043
cel-miR-392-3p	8.9748	2.6155	4.7957	4.7412
cel-miR-784-5p	0	0.9094	0	1.6829
cel-miR-784-3p	0	1.0371	1.8671	3.5145
cel-miR-785	33.1377	72.528	20.0553	67.2902
cel-miR-786-5p	0.6904	0.9094	0.788	4.3776
cel-miR-786-3p	13.8074	1.3828	6.2349	27.2918
cel-miR-787-5p	0	0	0	0.3182
cel-miR-787-3p	17.2592	15.4342	6.8478	13.5262
cel-miR-788-5p	25.5437	45.3037	48.4703	100.266
cel-miR-788-3p	7.5941	10.6512	27.8481	19.5187
cel-miR-789	51.7777	63.2494	56.8826	132.505
cel-miR-790-5p	1.3807	3.6003	2.2441	5.3124
cel-miR-790-3p	2.7615	5.877	9.0097	12.9854
cel-miR-791-5p	0	1.7285	3.3063	7.0605
cel-miR-791-3p	8.2844	0.6914	1.9995	2.1144
cel-miR-792-5p	0.6904	1.5784	3.8201	6.4721
cel-miR-792-3p	0.6904	1.2327	1.5202	1.1597
cel-miR-793	133.932	263.254	194.28	388.648
cel-miR-794-5p	57.3007	183.896	272.75	363.95
cel-miR-794-3p	3.4518	0.5413	0.3425	1.6027
cel-miR-795-5p	124.266	253.8	369.493	817.691
cel-miR-795-3p	0	0.6914	5.4644	10.3404
cel-miR-796	0	0.6914	1.559	5.2099
cel-miR-797-5p	0	1.3828	1.6915	2.6376
cel-miR-797-3p	23.4726	21.5488	58.0167	49.8857
cel-miR-798	0	0.6914	2.0383	3.6146
cel-miR-799	0	1.6008	7.76	12.4599
cel-miR-800-5p	0	0.5637	1.0276	1.2862
cel-miR-800-3p	0	4.1116	4.9851	8.812
cel-miR-1018	58.6814	63.2789	68.1071	89.9186
cel-miR-1019-5p	0	1.541	2.2096	7.8516
cel-miR-1019-3p	15.1881	1.3828	11.9342	3.6015
cel-miR-1020-5p	37.9703	25.6134	49.333	36.1251
cel-miR-1020-3p	0.6904	1.8188	2.3125	1.0572
cel-miR-1021	44.874	34.767	53.9502	3.5906
cel-miR-1022-5p	75.9406	254.555	156.97	537.229
cel-miR-1022-3p	13.117	3.3294	4.8647	11.1189
cel-miR-1817	0	0.4136	5.0359	23.1337
cel-miR-1818	0	1.9241	1.182	0
cel-miR-1819-5p	0	0.6914	2.1708	0.8414
cel-miR-1819-3p	60.7525	73.1397	153.247	56.7103
cel-miR-1820-5p	9.6652	12.3521	13.2546	39.3628
cel-miR-1820-3p	1.3807	0	0.394	0.6497
cel-miR-1821	10.3555	10.3803	8.3773	35.1836
cel-miR-1822-5p	0.6904	0.3457	1.7429	4.4446
cel-miR-1822-3p	64.2043	127.718	169.119	141.392
cel-miR-1823	0	0.4136	0.6167	1.2862
cel-miR-1824-5p	0	1.7285	0	0.6365
cel-miR-1824-3p	1.3807	0	0	4.2122
cel-miR-1828	5.523	2.7287	3.7172	10.0015
cel-miR-1829a-5p	14.4978	13.8361	8.8742	18.5119
cel-miR-1829a-3p	0	3.7435	3.8885	12.9894
cel-miR-1829b	44.1836	10.6197	12.6585	18.9823
cel-miR-1829c	73.8695	31.4847	13.7508	23.4641
cel-miR-1830-5p	6.2133	8.5774	12.8527	7.4904
cel-miR-1830-3p	49.0162	49.119	36.8176	32.7462
cel-miR-1832a	6.9037	5.9609	4.543	9.1343
cel-miR-1833	0	0	0.8909	1.4911
cel-miR-58b-5p	0.6904	0.3457	0.8564	0.6869
cel-miR-58b-3p	0	1.7285	0.2227	3.0715
cel-miR-2207-5p	0	0.3457	0.9593	2.2301
cel-miR-2207-3p	10.3555	0.218	0.8006	1.4911
cel-miR-2208a-5p	0	0.6914	1.2504	0.229
cel-miR-2208a-3p	1.3807	1.9779	0.2227	0.8654
cel-miR-2208b-5p	0	0	1.5929	0.6497
cel-miR-2208b-3p	0	0	0	3.2849
cel-miR-2209a-5p	6.9037	19.9426	21.5443	24.9806
cel-miR-2209a-3p	0	2.0743	0.5138	3.8236
cel-miR-2209c-5p	0	2.6155	0.4454	0.8786
cel-miR-2209c-3p	0	0	2.6677	0
cel-miR-2210-5p	6.2133	3.6152	22.417	12.1508
cel-miR-2210-3p	106.317	143.451	100.809	126.718
cel-miR-2211-5p	0	0.218	1.2849	2.1276
cel-miR-2211-3p	20.7111	13.9961	20.6079	55.1642
cel-miR-2212-5p	8.2844	3.9914	31.112	48.8731
cel-miR-2212-3p	0	0	0.5138	0
cel-miR-2213-5p	0	6.9762	0.6851	1.6937
cel-miR-2213-3p	0	0	1.246	0
cel-miR-2214-5p	193.303	297.747	393.077	879.578
cel-miR-2214-3p	44.1836	50.2415	37.7694	58.9237
cel-miR-2215-5p	0	0.1955	0.1713	0
cel-miR-2215-3p	0	0.218	0.1713	0.3182
cel-miR-2216-5p	0	0.3457	0.6681	0
cel-miR-2216-3p	0	0.3457	0	2.2524
cel-miR-1832b-5p	0.6904	1.6008	0.1713	0.229
cel-miR-1832b-3p	0	1.3828	1.7851	5.3239
cel-miR-2217-5p	9.6652	5.6446	3.3746	12.1572
cel-miR-2217-3p	0.6904	0.3457	1.6788	11.1372
cel-miR-2209b-5p	8.9748	13.3047	7.1088	8.2929
cel-miR-2209b-3p	0	0.5637	2.3892	4.5843
cel-miR-2218a-5p	0	1.6462	0.5653	4.0634
cel-miR-2218a-3p	0	1.3454	0.8564	1.0944
cel-miR-2218b-5p	0.6904	0.4136	2.2567	6.7359
cel-miR-2218b-3p	7.5941	0	2.2441	4.3908
cel-miR-2219-5p	0	4.1266	0	0.4207
cel-miR-2219-3p	0	0.8496	1.4173	0.4207
cel-miR-2220-5p	0	0.3911	0	0.4207
cel-miR-2220-3p	26.234	9.4944	2.6895	8.4685
cel-miR-2221	0	0.1955	2.3294	2.3325
cel-miR-2953-5p	0	0	0	0.229
cel-miR-2953-3p	0.6904	0	2.5007	0.6365
cel-miR-4805-5p	0	6.6678	4.0083	8.5178
cel-miR-4805-3p	0.6904	16.1473	4.5391	2.5723
cel-miR-4806-5p	185.019	57.6467	58.8914	54.6766
cel-miR-4806-3p	197.446	90.9769	101.404	95.6098
cel-miR-4807	0	5.8861	1.8671	6.5373
cel-miR-4808-5p	0	0.218	0	1.2621
cel-miR-4808-3p	169.831	139.247	141.207	206.834
cel-miR-4809-5p	0.6904	2.1875	1.7303	3.2484
cel-miR-4809-3p	0.6904	1.2327	0.6681	5.6925
cel-miR-4810	0	1.7285	0.8394	5.2843
cel-miR-4811-5p	0	0.218	0.1713	0.3182
cel-miR-4811-3p	11.0459	11.3512	5.4469	8.1921
cel-miR-4812-5p	0	0	1.4216	0.4207
cel-miR-4812-3p	9.6652	0.218	1.4731	3.2724
cel-miR-4813-5p	0	0.218	1.3532	3.174
cel-miR-4813-3p	13.8074	56.0559	27.0655	62.6123
cel-miR-4814-5p	0	0.3457	1.182	1.7201
cel-miR-4814-3p	3.4518	0.3457	1.9869	1.3365
cel-miR-4815	32.4474	23.558	14.5049	24.7293
cel-miR-4816-5p	0	0.887	4.8308	14.3534
cel-miR-4816-3p	18.64	26.6082	23.548	52.966
cel-miR-4920	1.3807	0.218	1.8501	3.5923
cel-miR-4921	0	0.1955	1.7127	0.4207
cel-miR-4922	0	0	0.4454	0
cel-miR-4923a	0	0.1955	0.6293	0
cel-miR-4924	0	0.4136	0.9593	0.6365
cel-miR-4923b	0.6904	0.4136	0.6167	4.9553
cel-miR-4925	0	1.0371	0	0.6365
cel-miR-4926	1.3807	0.3457	0.6681	1.3755
cel-miR-4927	0	1.519	0.6681	2.459
cel-miR-4929	5.523	0.5637	0	0.6365
cel-miR-4930	0	0.3457	0	0
cel-miR-4931	0	7.0136	1.1989	1.1597
cel-miR-4932	14.4978	3.1114	8.4746	15.1918
cel-miR-4933	0	0.218	0.6167	1.6937
cel-miR-4934	0.6904	0.3457	0	0.4207
cel-miR-4935	0.6904	1.2551	1.576	0.4207
cel-miR-4936	0	11.5821	0.1713	0.3182
cel-miR-4937	24.8533	13.5035	29.9966	19.1433
cel-miR-4938	0	0	1.9142	2.1127
cel-miR-5545-5p	11.0459	14.0232	25.9257	63.5272
cel-miR-5545-3p	0	20.4094	5.3397	6.1653
cel-miR-5546-5p	2.0711	42.451	19.7021	14.5549
cel-miR-5546-3p	0	0	0	0.229
cel-miR-5547-5p	6.9037	0	0.4454	0
cel-miR-5547-3p	0.6904	0.6914	1.3363	0.739
cel-miR-5548-5p	4.1422	0.7368	1.3018	0.739
cel-miR-5548-3p	0	8.9601	2.8515	2.2541
cel-miR-5549-5p	0	0	0	0
cel-miR-5549-3p	40.0414	59.9578	52.058	87.0076
cel-miR-5550-5p	0	5.7429	8.4421	9.5848
cel-miR-5550-3p	2.0711	4.593	11.0709	5.1338
cel-miR-5551-5p	34.5185	19.5087	44.6176	66.4567
cel-miR-5551-3p	0	0	0	0.739
cel-miR-5552-5p	2.7615	7.4795	21.0511	25.2866
cel-miR-5552-3p	2.0711	2.3376	12.9094	4.4733
cel-miR-5553-5p	11.7363	1.5784	3.8025	5.8562
cel-miR-5553-3p	0	0.3457	0	0.3182
cel-miR-5592-5p	88.3673	53.0271	113.691	167.961
cel-miR-5592-3p	244.391	81.2962	354.794	412.209
cel-miR-5593-5p	0	10.1679	1.5076	9.7559
cel-miR-5593-3p	0.6904	3.3978	1.6274	2.5351
cel-miR-5594-5p	16.5689	16.6999	40.8919	28.669
cel-miR-5594-3p	8.2844	15.558	40.8398	17.9914
cel-miR-356b-5p	37.9703	57.0547	27.7118	96.2143
cel-miR-356b-3p	32.4474	39.8913	27.0141	53.4953
cel-miR-5595-5p	0	0.3457	1.3363	0.3182
cel-miR-5595-3p	0	6.1789	2.3984	2.7773
cel-Cal-01	190068	211440	299588	218510
cel-Cal-02	292322	272528	271608	290329
cel-Cal-03	422806	434099	344010	377727
cel-Cal-04	94804.3	81933.9	84793.8	113434

## Sheet: SRM
Group of targets predicted by TargetScan*		SRM		SRM		SRM		SRM		SRM		SRM		SRM
Gene public name	Gene sequence name	log2 fold change protein (mir-58.1 / WT)	SEM	log2 fold change protein (mir-80 / WT)	SEM	log2 fold change protein (mir-81-82 / WT)	SEM	log2 fold change protein (mir-80; mir-81-82 / WT)	SEM	log2 fold change protein (mir-80; mir-58.1 / WT)	SEM	log2 fold change protein (mir-58.1; mir-81-82 / WT)	SEM	log2 fold change protein (mir-80; mir-58.1; mir-81-82 / WT)	SEM
tag-72	C25A1.3	NA	NA	-4.74422	NA	0.315513	NA	NA	NA	NA	1.67607	0.667553	NA	NA	NA
F59F5.7	F59F5.7	NA	NA	NA	NA	3.15737	NA	NA	NA	NA	NA	NA	NA	NA	NA
gfl-1	M04B2.3	NA	NA	-1.60128	NA	0.674304	0.463322	0.470357	NA	1.14325	NA	0.163981	0.922855	NA	NA
C30B5.7	C30B5.7	-1.23025	0.0892535	0.345185	0.0563033	0.628487	0.169805	-1.77909	NA	0.769592	NA	1.03601	0.242966	5.42625	0.21605
F40F8.5	F40F8.5	1.33868	0.480231	0.75878	NA	0.520868	NA	-0.657938	0.380926	1.32536	NA	1.09399	NA	4.0743	1.25837
unc-130	C47G2.2	NA	NA	0.0165233	NA	0.871453	NA	NA	NA	NA	NA	-2.75523	NA	3.14817	NA
tag-342	B0464.8	0.841899	0.736047	-1.15319	NA	NA	NA	-0.124341	0.62075	NA	NA	NA	NA	1.96726	1.23316
C56G2.1	C56G2.1a	0.13166	0.257113	0.107246	0.266506	-0.0509407	0.291641	-0.0156498	0.496105	0.187713	0.2488	0.646025	0.0639973	1.94349	0.462154
rpa-1	F18A1.5	0.529129	0.48109	1.40913	1.48026	1.4206	1.50906	0.171442	0.492449	1.28118	1.03318	2.70432	1.27022	1.60782	0.141866
ZK616.4	ZK616.4	0.552043	0.253762	0.699061	0.110271	0.283955	0.0567536	0.382264	0.288971	1.20626	0.0566308	0.824891	0.296958	1.43003	0.551622
cids-1	C02F5.4	0.108035	0.525557	0.167383	0.0802582	4.29508	NA	-0.194582	0.0723269	0.0376257	NA	3.14258	1.07284	1.36328	0.425285
dpy-28	Y39A1B.3	0.4926	0.386844	1.1362	0.714596	0.297018	0.650696	-0.279474	0.163834	1.17687	0.423709	1.01481	0.462859	1.28119	0.898303
F27C1.2	F27C1.2a	1.1961	0.349259	1.03047	2.30499	5.59514	NA	0.965541	0.617585	1.68192	1.14036	5.21131	NA	1.19093	0.478682
isw-1	F37A4.8	0.471413	0.352683	0.440848	0.545064	1.11567	0.398317	0.287134	0.237423	1.07659	0.659611	0.884698	0.249339	0.993399	0.407461
ZK418.9	ZK418.9a	0.800049	0.430038	-0.932514	0.918873	-1.67795	1.3569	-0.0526527	0.181544	1.56082	0.700291	1.16589	1.12228	0.806144	0.687301
ife-3	B0348.6a	0.241242	0.178516	-0.00215921	0.222159	-0.0415265	0.477593	0.125078	0.219147	0.651781	0.204224	0.566571	0.26507	0.694547	0.423229
R11A8.5	R11A8.5	0.209719	0.359457	-0.663426	0.244339	0.0636	0.188989	0.161029	0.285482	0.436162	0.177763	0.48186	0.386119	0.586513	0.447622
unc-45	F30H5.1	0.464245	0.362277	-0.306062	0.0170648	0.0157519	0.245432	-0.0113646	0.284424	0.638806	0.201565	0.471919	0.644551	0.552288	0.598152
F56D3.1	F56D3.1	0.424365	0.176782	-0.78317	0.671411	0.0343865	0.230256	0.312732	0.163123	0.713984	0.283632	0.382304	0.379259	0.234636	0.512971
hmg-1.1	Y48B6A.14	-0.675222	1.48924	1.71931	0.671767	-0.0473562	0.401081	-0.933952	1.35924	4.12241	0.649206	0.817531	0.46292	0.223699	0.792622
F13D12.6	F13D12.6	0.307325	0.279338	0.0256275	0.243183	0.530085	0.502951	0.221467	0.25327	0.66546	0.254478	0.720255	0.587391	-0.175387	0.623552
M28.8	M28.8	0.510865	1.06613	2.13451	NA	-0.155857	NA	-0.6057	0.166899	-1.51213	NA	-0.576043	NA	-0.28757	0.0769548
flh-2	C26E6.2	-0.905887	1.18253	NA	0.68717	-1.50624	3.59685	-0.453847	0.752968	1.47022	NA	-1.86234	NA	-0.595773	0.596318
F47B7.2	F47B7.2a	-0.532838	0.683606	-0.754038	1.06182	-1.76911	2.16283	-0.849833	0.949465	-0.5739	1.81186	-0.75571	2.41823	-1.08463	0.52284
Control random group*		SRM		SRM		SRM		SRM		SRM		SRM		SRM
Gene public name	Gene sequence name	log2 fold change protein (mir-58.1 / WT)	SEM	log2 fold change protein (mir-80 / WT)	SEM	log2 fold change protein (mir-81-82 / WT)	SEM	log2 fold change protein (mir-80; mir-81-82 / WT)	SEM	log2 fold change protein (mir-80; mir-58.1 / WT)	SEM	log2 fold change protein (mir-58.1; mir-81-82 / WT)	SEM	log2 fold change protein (mir-80; mir-58.1; mir-81-82 / WT)	SEM
F13G3.10	F13G3.10	-0.157437	NA	NA	NA	-0.0534121	NA	-0.152411	NA	0.0246632	NA	0.854676	NA	NA	NA
crn-1	Y47G6A.8	0.381218	0.460332	-0.604804	0.19984	-0.0185995	0.346157	0.339141	0.186532	0.727559	0.510006	0.228642	NA	2.81493	1.4175
bcs-1	F54C9.6	0.401424	0.62097	0.526379	0.61497	-0.174397	0.558013	-0.128603	0.601717	1.45469	0.939282	0.405671	0.242544	2.47615	2.14784
Y69E1A.2	Y69E1A.2	1.40317	1.66596	0.69683	0.453971	0.95862	0.980796	0.246217	0.704884	0.711409	0.224558	1.23208	0.527361	2.20475	1.07539
Y66H1A.4	Y66H1A.4	-0.205732	0.523594	0.155273	0.80821	-0.505488	0.659454	0.0941401	0.0535573	0.400994	0.792555	0.0298662	0.444955	1.69932	0.278323
C32E8.3	C32E8.3	0.719548	0.582017	0.610447	0.874877	1.13042	0.437207	0.457898	0.564123	0.804444	0.284729	0.535422	0.376808	1.22486	0.392639
ran-1	K01G5.4	0.249942	0.317301	-0.617146	0.589865	-1.14564	0.275264	0.0305197	0.242627	0.0851276	0.365152	0.682769	0.273817	0.580338	0.559441
dad-1	F57B10.10	0.156012	0.250988	-0.205518	0.214205	-0.103485	0.343816	0.0423022	0.425822	0.150385	0.142492	0.408603	0.165553	0.139637	0.450283
F39H2.3	F39H2.3	0.00341115	0.136759	-0.45425	2.27858	-0.00170299	1.44262	-0.0392556	0.325409	-0.779923	1.77344	1.02372	1.78871	-0.0229717	0.414116
F35G12.2	F35G12.2	-0.808208	0.417913	-0.0500502	0.413673	-1.25108	0.539446	-0.397042	0.532722	0.963808	1.95547	-0.554463	0.626053	-0.0264215	0.998665
F45H10.2	F45H10.2	0.0855661	0.307261	0.449331	0.346265	-0.0383929	0.268274	0.0919781	0.265345	0.148778	0.0487232	0.285901	0.37958	-0.0553868	0.555893
cey-1	F33A8.3	0.178727	0.462215	-0.644059	NA	2.19765	NA	0.152454	0.326043	-1.9261	1.95056	-4.40776	NA	-0.240536	0.694219
rps-10	D1007.6	0.0489177	0.232059	-0.324538	0.199002	-0.804643	0.359742	0.0116709	0.235323	-0.0377961	0.203259	-0.368745	0.0634891	-0.384274	0.465768
F17C8.3	F17C8.3	-0.164553	0.319953	-0.5203	0.240775	0.518854	0.661984	-0.0394867	0.303356	-0.0255705	0.340832	0.256816	0.274452	-0.384899	0.486305
R12E2.11	R12E2.11	-0.24897	0.194186	-0.58759	0.690567	-0.0879134	0.408627	0.113177	0.158464	-0.757073	0.529757	-0.245599	0.633791	-0.80188	0.378542
elo-1	F56H11.4	-0.222923	0.218793	-0.380219	0.201817	-0.14539	0.308446	0.206281	0.218075	-0.280932	0.0627275	0.0597675	0.307086	-0.815649	0.444961
C48B4.8	C48B4.8	-1.34359	NA	0.667729	0.360967	2.46046	2.15509	-1.69201	1.01489	1.02241	0.193532	2.21169	0.429747	-0.851844	NA
F32D1.5	F32D1.5	-0.470382	0.597258	-0.199108	0.0672257	0.1034	0.0938435	-0.543214	0.556453	0.6072	0.392674	0.257622	0.533744	-0.85362	0.56883
pmt-2	F54D11.1	0.0239129	0.233154	-0.446211	0.470509	-0.199147	0.365905	0.0280059	0.22656	-0.639461	0.571122	-0.147449	0.518386	-1.02788	0.370692
F28A12.4	F28A12.4	0.183986	0.223352	-0.238418	0.421979	0.098761	0.243632	0.311551	0.227659	-1.09788	0.305666	0.525782	0.419995	-1.5132	0.439749
smg-4	F46B6.3a	-0.022038	2.08212	2.35575	1.19972	-0.684091	NA	1.0994	1.12763	1.34397	NA	-2.12262	NA	-1.95993	NA
col-167	T10E10.2	-0.191994	0.463324	-0.189522	0.747833	-2.25478	2.64263	-0.232708	0.5709	-2.9007	1.21761	-1.1524	1.34801	-2.20151	0.866314
* - NA - protein succesfully measured in one replicate

## Sheet: qRT-PCR
Group of targets predicted by TargetScan*		qRT-PCR		qRT-PCR		qRT-PCR		qRT-PCR		qRT-PCR		qRT-PCR		qRT-PCR
Gene public name	Gene sequence name	log2 fold change mRNA (mir-58.1 / WT)	SEM	log2 fold change mRNA (mir-80 / WT)	SEM	log2 fold change mRNA (mir-81-82 / WT)	SEM	log2 fold change mRNA (mir-80; mir-81-82 / WT)	SEM	log2 fold change mRNA (mir-80; mir-58.1 / WT)	SEM	log2 fold change mRNA (mir-58.1; mir-81-82 / WT)	SEM	log2 fold change mRNA (mir-80; mir-58.1; mir-81-82 / WT)	SEM
C30B5.7	C30B5.7	-0.318151	0.266851	0.799896	0.290449	0.204017	0.38744	0.907081	0.525471	1.22236	0.108944	-0.00408048	0.131599	2.59373	0.23179
F27C1.2	F27C1.2a	0.624382	0.327278	0.680121	0.405306	-0.498947	0.237001	0.141627	0.421932	0.698555	0.0313156	-0.322349	0.212544	2.20756	0.352838
isw-1	F37A4.8	0.481248	0.467469	1.1908	0.537521	1.37159	0.733268	0.451702	0.571722	2.56566	0.961747	2.65988	0.804093	2.02278	1.11059
tag-342	B0464.8	-0.18744	0.54393	0.519423	0.488027	-0.452538	0.945419	0.0664571	0.353626	-0.0838298	0.335334	0.560628	0.555598	2.01137	0.403475
ZK616.4	ZK616.4	0.677812	0.40218	0.353903	0.321094	0.123878	0.74878	-0.105059	0.32154	1.59345	0.287559	1.25194	0.153607	1.76502	0.139083
dpy-28	Y39A1B.3	0.0333558	0.244346	-0.150516	0.363268	-0.15492	0.904978	0.12116	0.354342	1.2071	0.40632	1.24126	0.225496	1.61933	0.294564
rpa-1	F18A1.5	0.492636	0.57962	0.264574	0.360315	0.209292	1.40245	-0.105497	0.624392	1.7906	0.378115	2.32933	0.513076	1.27949	0.508625
M28.8	M28.8	0.568988	NA	0.199399	0.495595	1.8655	0.857358	0.601908	0.242696	1.12713	0.346373	2.05178	0.57775	1.26568	0.42253
gfl-1	M04B2.3	-0.773544	0.688222	0.156115	0.583644	-0.382492	0.421886	-0.845791	0.437283	-0.096803	0.312765	0.627165	0.283676	1.08536	0.627997
unc-130	C47G2.2	0.081459	0.945635	-0.251651	0.170625	-0.0667677	0.676088	-0.129807	0.332475	-2.94823	NA	-0.013179	0.236819	1.0465	0.078251
hmg-1.1	Y48B6A.14	0.507558	0.287664	0.233031	0.0405898	0.174894	0.228465	-0.0150389	0.345926	1.03494	0.372143	0.181755	0.299616	1.00898	0.5704
F59F5.7	F59F5.7	0.834937	0.947868	0.438909	0.79616	0.376265	0.773836	0.582277	1.0099	-0.236862	0.343371	0.244875	0.41634	0.758453	0.375604
cids-1	C02F5.4	0.116007	0.283248	0.632657	0.401147	0.902362	0.752842	-0.290944	0.358679	1.68698	0.325782	1.77312	0.202506	0.609445	0.313801
ZK418.9	ZK418.9a	-0.0943069	0.375881	-0.0971753	0.196178	0.0661005	0.161275	-0.292189	0.140641	1.17038	0.375824	0.716502	0.209143	0.482632	0.527816
F56D3.1	F56D3.1	-0.84227	1.73438	-0.600369	1.63688	2.32476	1.21173	-1.13337	0.895775	1.58318	1.18693	1.05685	0.887803	0.340335	0.795764
R11A8.5	R11A8.5	-0.258248	0.889495	-0.453247	0.199904	-0.444524	1.00744	-0.52566	0.262947	0.516687	0.50461	1.26869	0.26081	0.298315	0.809664
F40F8.5	F40F8.5	-0.0952499	0.455607	-0.177161	0.177034	0.723889	0.479283	-0.233872	0.300302	0.667903	0.414691	0.757925	0.0874075	0.242743	0.786129
flh-2	C26E6.2	1.32379	0.0541012	-0.269473	0.164505	-0.250668	1.01508	0.474703	0.655017	0.508656	0.625778	1.33604	0.491846	0.238951	1.25326
ife-3	B0348.6a	0.099787	NA	0.184583	0.487723	0.109183	0.0877416	-0.375015	0.316147	0.204324	0.862376	-0.476626	0.41509	0.114737	0.334992
C56G2.1	C56G2.1a	-0.0943069	0.75029	0.22138	0.318704	0.785358	0.957546	0.0952371	0.553098	1.87438	0.580208	1.76008	0.273292	-0.000373273	0.77677
unc-45	F30H5.1	-0.626782	0.577506	-0.522025	0.246498	0.146727	0.763177	-0.217578	0.327614	-0.452587	0.358183	0.1697	0.137094	-0.0706395	0.439266
F47B7.2	F47B7.2a	-0.358977	0.346068	-0.184438	0.250043	-0.18966	0.629776	-0.222206	0.301452	-0.637168	0.245185	-0.533843	0.0901197	-0.721983	0.499193
F13D12.6	F13D12.6	-0.0979036	0.100031	-0.143623	0.283106	-0.000734406	0.363763	-0.134487	0.0432973	-0.265242	0.473393	-0.15489	0.157914	-0.755601	0.626506
Control random group*		qRT-PCR		qRT-PCR		qRT-PCR		qRT-PCR		qRT-PCR		qRT-PCR		qRT-PCR
Gene public name	Gene sequence name	log2 fold change mRNA (mir-58.1 / WT)	SEM	log2 fold change mRNA (mir-80 / WT)	SEM	log2 fold change mRNA (mir-81-82 / WT)	SEM	log2 fold change mRNA (mir-80; mir-81-82 / WT)	SEM	log2 fold change mRNA (mir-80; mir-58.1 / WT)	SEM	log2 fold change mRNA (mir-58.1; mir-81-82 / WT)	SEM	log2 fold change mRNA (mir-80; mir-58.1; mir-81-82 / WT)	SEM
smg-4	F46B6.3a	0.081459	0.674361	0.243868	0.472116	0.183967	0.602932	0.110352	0.617088	0.636508	0.0494789	1.08736	0.456879	1.33917	0.909398
C48B4.8	C48B4.8	1.32379	1.24289	0.694223	0.597376	0.271671	0.547686	0.394277	0.863128	0.871579	0.0598262	-0.457469	0.460316	1.32626	0.413698
col-167	T10E10.2	0.099787	0.936166	-0.407126	0.503324	-0.159773	0.431041	0.627312	0.984635	-0.0446012	0.781152	-0.558486	0.555871	0.85914	1.32036
F39H2.3	F39H2.3	-0.216526	0.243643	0.139296	0.536625	-0.205571	0.330653	-0.244818	0.189902	0.311699	0.324023	0.64694	0.0830266	0.765317	0.224947
bcs-1	F54C9.6	0.0564461	0.482896	0.0505997	0.198369	-0.242433	1.09172	-0.192183	0.336438	0.545165	0.450989	1.16644	0.220711	0.696112	0.241942
dad-1	F57B10.10	0.834937	0.910158	0.357573	0.343943	-0.227715	0.312189	0.313389	0.5846	0.351209	0.319921	-0.655873	0.433773	0.670935	0.0752209
Y66H1A.4	Y66H1A.4	0.568988	0.658544	0.337246	0.339767	-0.059174	0.199161	0.237584	0.559835	0.847631	0.237064	-0.487236	0.316452	0.607603	0.0942238
Y69E1A.2	Y69E1A.2	-0.0701102	2.30672	0.586211	2.14617	1.21879	2.02637	-1.87985	2.33846	-0.720138	2.23331	-0.390734	2.37996	0.566684	1.22271
ran-1	K01G5.4	-0.178049	0.250585	0.206852	0.193603	0.141892	0.0709213	-0.0463581	0.113766	0.435081	0.264825	0.120676	0.189772	0.504551	0.483979
rps-10	D1007.6	-0.23247	0.265664	-0.18539	0.200143	-0.325124	0.180961	0.173262	0.5377	-0.583176	0.0873022	-0.72892	0.315622	-0.0504709	0.416321
C32E8.3	C32E8.3	-0.897942	0.690734	-0.405362	0.198232	0.240526	0.248976	-0.312588	0.376614	-0.121215	0.292528	0.68821	0.118725	-0.0542299	0.850421
F45H10.2	F45H10.2	-0.312466	0.288883	-0.078284	0.278189	-0.181059	0.218784	1.13792	0.974952	-0.533972	0.0722883	-0.648279	0.32633	-0.0631669	0.264496
F13G3.10	F13G3.10	-0.622441	0.429082	-0.141976	0.264221	0.109347	0.301046	-0.0454944	0.345986	-0.029977	0.277213	0.744757	0.216349	-0.0680105	0.858665
elo-1	F56H11.4	0.116007	0.500631	-0.0349397	0.275318	-0.281724	0.551167	0.532477	0.789296	-0.639297	0.389593	-0.533676	0.56908	-0.263501	0.452809
cey-1	F33A8.3	-0.172845	0.183127	0.143221	0.353109	0.175354	0.0813097	-0.0493122	0.235883	0.345814	0.45715	0.199805	0.254311	-0.304785	0.998568
F32D1.5	F32D1.5	-0.258248	0.083514	-0.0532838	0.182046	-0.132918	0.155903	0.0161578	0.100579	0.0187703	0.383062	-0.334936	0.0712699	-0.371358	0.79393
crn-1	Y47G6A.8	-0.628546	0.354554	0.138436	0.367807	0.372654	0.172262	-0.478262	0.294505	0.603428	0.386524	0.366754	0.11952	-0.529111	0.635479
R12E2.11	R12E2.11	-0.762911	0.0715303	-0.134822	0.25394	-0.213145	0.18748	-0.354974	0.203012	-0.783158	0.0808436	-0.859546	0.200171	-1.09343	0.419459
F17C8.3	F17C8.3	NA	NA	-1.02534	0.920737	-0.053856	0.703587	-0.921523	1.03414	0.487433	11.2307	0.892515	0.0353387	-1.30187	1.92258
F28A12.4	F28A12.4	-0.709349	0.655197	-0.178145	0.287586	0.71747	0.607149	-0.26285	0.429714	-1.13888	0.613983	0.951392	0.126628	-1.38147	0.798341
pmt-2	F54D11.1	-0.318151	0.196606	-0.252852	0.224204	-0.348451	0.163939	-0.213385	0.144914	-0.629347	0.53255	-0.243658	0.0833855	-1.85437	0.863724
*- NA - protein succesfully measured in one replicate
