# Supplementary material for: Cooperative target mRNA destabilization and translation inhibition by miR-58 microRNA family in C. elegans
Source: HighWire-hosted journal article supplement (doi:10.1101/gr.183160.114), 2015-07-31
Supplement: Supplemental_Table_5.xlsx [file Supplemental_Table_5.xlsx]

## Sheet: qRT-PCR Targets vs. Random
Gene public name	Gene sequence name	Group	Primer_forward	Sequence Forward	Primer_reverse	Sequence Reverse
bcs-1	F54C9.6	Random	F54C9.6_F	gaaaggacacttgatgatgacaga	F54C9.6_R	tgtcctccaggatcacaaca
R12E2.11	R12E2.11	Random	R12E2.11_F	tgccaatctcgcagaagata	R12E2.11_R	tcggtcatctcgtttttcgt
F28A12.4	F28A12.4	Random	F28A12.4_F	gggacattgggaattgacac	F28A12.4_R	tcttttgggctccatttgaa
pmt-2	F54D11.1	Random	F54D11.1_F	cgagaagcttttctcaagaatctataa	F54D11.1_R	ccatacattgtgatgagcacct
F32D1.5	F32D1.5	Random	F32D1.5_F	cttcgctggacacgatca	F32D1.5_R	ctcattccgtagaacaatttgaac
rps-10	D1007.6	Random	D1007.6_F	gctcttccagctgagatcgt	D1007.6_R	tctcccttctcgccttgag
C48B4.8	C48B4.8	Random	C48B4.8_F	gatgatggacgatttgtaattgtt	C48B4.8_R	ggattatggacagaatgacgtg
F45H10.2	F45H10.2	Random	F45H10.2_F	cctacgtctgggatcagtgg	F45H10.2_R	ggctggattctttcggttg
F13G3.10	F13G3.10	Random	F13G3.10_F	aaacaacaggtggacaaacaca	F13G3.10_R	catctttctcttctctagtgtcggata
Y69E1A.2	Y69E1A.2	Random	Y69E1A.2_F	gagaacctgtcatgggtcgt	Y69E1A.2_R	ttcgttattgaaccacgagaag
smg-4	F46B6.3a	Random	F46B6.3a_F	ccgaagtcagctccaatga	F46B6.3a_R	gccgtgtatcggtttcctta
F39H2.3	F39H2.3	Random	F39H2.3_F	aaaaatatgaaaatttgcgacga	F39H2.3_R	tgagcagatcaccgtttgc
crn-1	Y47G6A.8	Random	Y47G6A.8_F	cgattcttgagaatatcgatcaaa	Y47G6A.8_R	tcacgagcacgcttgtatg
ran-1	K01G5.4	Random	K01G5.4_F	ttgactggagagttcgagaaga	K01G5.4_R	tgtggaagacaagtgggtga
F17C8.3	F17C8.3	Random	F17C8.3_F	gtcgtttggagagtgaactgg	F17C8.3_R	cttttccatttcttgcttgagaa
Y66H1A.4	Y66H1A.4	Random	Y66H1A.4_F	ccaccagaggaagttgtgct	Y66H1A.4_R	gcaaacaatatcatcttggcact
F35G12.2	F35G12.2	Random	F35G12.2_F	ctcatattcggcgactttctg	F35G12.2_R	acgttgctcgacatcttgttt
elo-1	F56H11.4	Random	F56H11.4_F	aaccattgccaacaaaggaa	F56H11.4_R	tggtgtcaacaagttcgaaaag
cey-1	F33A8.3	Random	F33A8.3_F	aatggccgagaaaaacgac	F33A8.3_R	tttgtagccttcactggcttg
dad-1	F57B10.10	Random	F57B10.10_F	ctcgtcggtacattcccatt	F57B10.10_R	acttgcatcctgagacacga
C32E8.3	C32E8.3	Random	C32E8.3_F	ctggaaagaacttcgacaagtg	C32E8.3_R	gtcgaaagtggccttcttttt
col-167	T10E10.2	Random	T10E10.2_F	aggaggttgcgaccactg	T10E10.2_R	aagacaggcaacgcaaaaa
rpa-1	F18A1.5	TargetScan	F18A1.5_F	ccacaatcaccgagaatcttt	F18A1.5_R	cgtagtcgtgtccagtattgttg
isw-1	F37A4.8	TargetScan	F37A4.8_F	ttatcattatcgcaagacaatcg	F37A4.8_R	ctttcggtggaacatccttc
tag-342	B0464.8	TargetScan	B0464.8_F	gctcaagtttttctcgcatttc	B0464.8_R	ccttctgcgggattcattt
F40F8.5	F40F8.5	TargetScan	F40F8.5_F	agacgtaggagagatcaggatga	F40F8.5_R	agatctacgacgacgatgattg
unc-130	C47G2.2	TargetScan	C47G2.2_F	atgaagacggcgttccagt	C47G2.2_R	tttcggtgaccagacattga
C30B5.7	C30B5.7	TargetScan	C30B5.7_F	ttgtactctactgcaattcgaacc	C30B5.7_R	cccatccagaatgttgagact
ife-3	B0348.6a	TargetScan	B0348.6a_F	ggttgttgtcgataagcaaaga	B0348.6a_R	tcgtcgaattgctctccaa
F13D12.6	F13D12.6	TargetScan	F13D12.6_F	actgacaagctcggtcttacg	F13D12.6_R	ccgatttgacccttcacagt
unc-45	F30H5.1	TargetScan	F30H5.1_F	cgatgatttctttccctggac	F30H5.1_R	agttggcttttccttcaacg
F27C1.2	F27C1.2a	TargetScan	F27C1.2a_F	acaaatcatgcgtggagaca	F27C1.2a_R	tgttgctctgtgagtgggtaa
R11A8.5	R11A8.5	TargetScan	R11A8.5_F	cgatcagtcactcgaccaga	R11A8.5_R	agaatttgttagggtagttgagaactg
C56G2.1	C56G2.1a	TargetScan	C56G2.1a_F	tgaggatgagaagacgcaga	C56G2.1a_R	tttgtcgatcgatggtttttc
ZK616.4	ZK616.4	TargetScan	ZK616.4_F	ggttttgttttctgaaagctcgt	ZK616.4_R	tggaatttttcgaacatgatctc
cids-1	C02F5.4	TargetScan	C02F5.4_F	tggtccaaaatgaagaagctc	C02F5.4_R	cgcgttcatttgtctcgtt
hmg-1.1	Y48B6A.14	TargetScan	Y48B6A.14_F	gtcgaatggggaaaactcac	Y48B6A.14_R	tcgacttcgtatctcttcttatcg
F47B7.2	F47B7.2a	TargetScan	F47B7.2a_F	accgcatgaacgaaaaagag	F47B7.2a_R	ccaagatgaatagcataaacactcc
dpy-28	Y39A1B.3	TargetScan	Y39A1B.3_F	gaaccattggtcactttgatga	Y39A1B.3_R	cacgtttcgaaggggttg
F56D3.1	F56D3.1	TargetScan	F56D3.1_F	ggatcggtttcccagaaag	F56D3.1_R	cccagcatgaaagctattaagagta
gfl-1	M04B2.3	TargetScan	M04B2.3_F	aacaggcatttttgaatgatattg	M04B2.3_R	tcacggaggtcttctatttcg
ZK418.9	ZK418.9a	TargetScan	ZK418.9a_F	ggccacttgattcggaaata	ZK418.9a_R	tcgccgacttctgatgattt
M28.8	M28.8	TargetScan	M28.8_F	gatgatttggcaatgtataactacaga	M28.8_R	attggtgttgcccacaattc
F59F5.7	F59F5.7	TargetScan	F59F5.7_F	ccaaagcaaatgactttttatttatg	F59F5.7_R	gaacaattgctactggtcgaga
flh-2	C26E6.2	TargetScan	C26E6.2_F	ccgaagaacttgcattttatga	C26E6.2_R	ttgcatgtaggatcggttga
pgk-1	T03F1.3	Normalization control	T03F1.3_F	gcgatatttatgtcaatgatgctttc	T03F1.3_R	tgagtgctcgactccaacca
cdc-42	R07G3.1	Normalization control	R07G3.1_F	ctgctggacaggaagattacg	R07G3.1_R	ctcggacattctcgaatgaag
Y45F10D.4	Y45F10D.4	Normalization control	Y45F10D.4_F	gtcgcttcaaatcagttcagc	Y45F10D.4_R	gttcttgtcaagtgatccgaca
mpk-1	F43C1.2	Normalization control	F43C1.2_F	tgctcagtaatcggccattg	F43C1.2_R	tccaacaactgccaaaatcaaa
tbp-1	T20B12.2	Normalization control	T20B12.2_F	ttggatttgaagaagattgcattg	T20B12.2_R	aatgactgctgcgaaacgttt

## Sheet: miRNA qRT-PCR
cDNA stem loop RT primers	Sequence	qRT-PCR primers	Sequence
miR-58.1	CTCAACTGGTGTCGTGGAGTCGGCAATTCAGTTGAGATTGCCGT	Universal reverse	CTCAAGTGTCGTGGAGTCGGCAA
miR-80	CTCAACTGGTGTCGTGGAGTCGGCAATTCAGTTGAGTCGGCTTT	miR-58.1_F	ACACTCCAGCTGGGTGAGATCGTTCAGTAC
miR-81	CTCAACTGGTGTCGTGGAGTCGGCAATTCAGTTGAGACTAGCTT	miR-80_F	ACACTCCAGCTGGGTGAGATCATTAGTTGAA
miR-82	CTCAACTGGTGTCGTGGAGTCGGCAATTCAGTTGAGACTGGCTT	miR-81_F	ACACTCCAGCTGGGTGAGATCATCGTGAAA
miR-52	CTCAACTGGTGTCGTGGAGTCGGCAATTCAGTTGAGGCTACCCT	miR-82_F	ACACTCCAGCTGGGTGAGATCATCGTGAAA
miR-250	CTCAACTGGTGTCGTGGAGTCGGCAATTCAGTTGAGGCCAACAG	miR-52_F	ACACTCCAGCTGGGCACGTTACAATGAAAG
		miR-250_F	ACACTCCAGCTGGGAATCACAGTCAACT

## Sheet: qRT-PCR egl-1 induction
Gene public name	Gene sequence name	Group	Primer_forward	Sequence Forward	Primer_reverse	Sequence Reverse
pgk-1	T03F1.3	Normalization control	T03F1.3_F	gcgatatttatgtcaatgatgctttc	T03F1.3_R	tgagtgctcgactccaacca
cdc-42	R07G3.1	Normalization control	R07G3.1_F	ctgctggacaggaagattacg	R07G3.1_R	ctcggacattctcgaatgaag
Y45F10D.4	Y45F10D.4	Normalization control	Y45F10D.4_F	gtcgcttcaaatcagttcagc	Y45F10D.4_R	gttcttgtcaagtgatccgaca
egl-1	F23B12.9	CEP-1 activation assay	F23B12.9_F	ttctcaatttgccgacgact	F23B12.9_R	ggagccgatctcgtagcc
