# Supplementary material for: Cooperative target mRNA destabilization and translation inhibition by miR-58 microRNA family in C. elegans
Source: HighWire-hosted journal article supplement (doi:10.1101/gr.183160.114), 2015-07-31
Supplement: Supplemental_Table_6.xlsx [file Supplemental_Table_6.xlsx]

## Sheet: Sheet1
Protein	Peptide	Precursor Ion Charge	Q1 (m/z)	Fragment Ion Charge	Q3 (m/z)	Fragment series	Fragment number	CE	Expected Retention Time	Candidate Group	Isotype
F30H5.1	IGAAGGDDISK	2	502.256	1	890.422	y	10	20.3907	24.0944	TargetScan	light
F30H5.1	IGAAGGDDISK	2	502.256	1	691.326	y	7	20.3907	24.0944	TargetScan	light
F30H5.1	IGAAGGDDISK	2	502.256	1	762.363	y	8	20.3907	24.0944	TargetScan	light
F30H5.1	IGAAGGDDISK	2	502.256	1	634.305	y	6	20.3907	24.0944	TargetScan	light
F30H5.1	IGAAGGDDISK	2	502.256	1	833.401	y	9	20.3907	24.0944	TargetScan	light
F30H5.1	IGAAGGDDISK	2	508.239	1	901.389	y	10	20.5941	24.0944	TargetScan	heavy
F30H5.1	IGAAGGDDISK	2	508.239	1	699.302	y	7	20.5941	24.0944	TargetScan	heavy
F30H5.1	IGAAGGDDISK	2	508.239	1	771.336	y	8	20.5941	24.0944	TargetScan	heavy
F30H5.1	IGAAGGDDISK	2	508.239	1	641.283	y	6	20.5941	24.0944	TargetScan	heavy
F30H5.1	IGAAGGDDISK	2	508.239	1	843.37	y	9	20.5941	24.0944	TargetScan	heavy
C47G2.2	DDDDDDDSTSR	2	628.213	1	680.285	y	6	24.6732	26.0212	TargetScan	light
C47G2.2	DDDDDDDSTSR	2	628.213	1	565.258	y	5	24.6732	26.0212	TargetScan	light
C47G2.2	DDDDDDDSTSR	2	628.213	1	795.312	y	7	24.6732	26.0212	TargetScan	light
C47G2.2	DDDDDDDSTSR	2	628.213	1	1025.37	y	9	24.6732	26.0212	TargetScan	light
C47G2.2	DDDDDDDSTSR	2	628.213	1	576.143	b	5	24.6732	26.0212	TargetScan	light
C47G2.2	DDDDDDDSTSR	2	635.193	1	689.258	y	6	24.9105	26.0212	TargetScan	heavy
C47G2.2	DDDDDDDSTSR	2	635.193	1	573.234	y	5	24.9105	26.0212	TargetScan	heavy
C47G2.2	DDDDDDDSTSR	2	635.193	1	805.282	y	7	24.9105	26.0212	TargetScan	heavy
C47G2.2	DDDDDDDSTSR	2	635.193	1	1037.33	y	9	24.9105	26.0212	TargetScan	heavy
C47G2.2	DDDDDDDSTSR	2	635.193	1	581.127	b	5	24.9105	26.0212	TargetScan	heavy
F57B10.10	SEFTAVSTER	2	563.772	1	910.463	y	8	22.4822	27.0586	Random	light
F57B10.10	SEFTAVSTER	2	563.772	1	662.347	y	6	22.4822	27.0586	Random	light
F57B10.10	SEFTAVSTER	2	563.772	1	763.395	y	7	22.4822	27.0586	Random	light
F57B10.10	SEFTAVSTER	2	563.772	1	492.242	y	4	22.4822	27.0586	Random	light
F57B10.10	SEFTAVSTER	2	563.772	1	591.31	y	5	22.4822	27.0586	Random	light
F57B10.10	SEFTAVSTER	2	570.253	1	921.43	y	8	22.7026	27.0586	Random	heavy
F57B10.10	SEFTAVSTER	2	570.253	1	671.32	y	6	22.7026	27.0586	Random	heavy
F57B10.10	SEFTAVSTER	2	570.253	1	773.365	y	7	22.7026	27.0586	Random	heavy
F57B10.10	SEFTAVSTER	2	570.253	1	499.22	y	4	22.7026	27.0586	Random	heavy
F57B10.10	SEFTAVSTER	2	570.253	1	599.286	y	5	22.7026	27.0586	Random	heavy
F30H5.1	EQLGNVGPAFQDAK	2	737.37	1	833.416	y	8	28.3846	33.4848	TargetScan	light
F30H5.1	EQLGNVGPAFQDAK	2	737.37	1	1103.55	y	11	28.3846	33.4848	TargetScan	light
F30H5.1	EQLGNVGPAFQDAK	2	737.37	1	776.394	y	7	28.3846	33.4848	TargetScan	light
F30H5.1	EQLGNVGPAFQDAK	2	737.37	1	932.484	y	9	28.3846	33.4848	TargetScan	light
F30H5.1	EQLGNVGPAFQDAK	2	737.37	1	1216.63	y	12	28.3846	33.4848	TargetScan	light
F30H5.1	EQLGNVGPAFQDAK	2	746.344	1	843.386	y	8	28.6897	33.4848	TargetScan	heavy
F30H5.1	EQLGNVGPAFQDAK	2	746.344	1	1117.51	y	11	28.6897	33.4848	TargetScan	heavy
F30H5.1	EQLGNVGPAFQDAK	2	746.344	1	785.367	y	7	28.6897	33.4848	TargetScan	heavy
F30H5.1	EQLGNVGPAFQDAK	2	746.344	1	943.451	y	9	28.6897	33.4848	TargetScan	heavy
F30H5.1	EQLGNVGPAFQDAK	2	746.344	1	1231.59	y	12	28.6897	33.4848	TargetScan	heavy
F18A1.5	VEQGEQLGHAFTFR	3	540.27	1	835.422	y	7	27.0859	36.5789	TargetScan	light
F18A1.5	VEQGEQLGHAFTFR	3	540.27	2	631.818	y	11	27.0859	36.5789	TargetScan	light
F18A1.5	VEQGEQLGHAFTFR	3	540.27	1	641.341	y	5	27.0859	36.5789	TargetScan	light
F18A1.5	VEQGEQLGHAFTFR	3	540.27	1	570.304	y	4	27.0859	36.5789	TargetScan	light
F18A1.5	VEQGEQLGHAFTFR	3	540.27	1	778.4	y	6	27.0859	36.5789	TargetScan	light
F18A1.5	VEQGEQLGHAFTFR	3	547.25	1	847.385	y	7	27.393	36.5789	TargetScan	heavy
F18A1.5	VEQGEQLGHAFTFR	3	547.25	2	640.292	y	11	27.393	36.5789	TargetScan	heavy
F18A1.5	VEQGEQLGHAFTFR	3	547.25	1	649.317	y	5	27.393	36.5789	TargetScan	heavy
F18A1.5	VEQGEQLGHAFTFR	3	547.25	1	577.283	y	4	27.393	36.5789	TargetScan	heavy
F18A1.5	VEQGEQLGHAFTFR	3	547.25	1	789.367	y	6	27.393	36.5789	TargetScan	heavy
F37A4.8	FTVYQFEGENYK	2	762.853	1	886.395	y	7	29.251	42.3425	TargetScan	light
F37A4.8	FTVYQFEGENYK	2	762.853	1	1177.52	y	9	29.251	42.3425	TargetScan	light
F37A4.8	FTVYQFEGENYK	2	762.853	1	610.284	y	5	29.251	42.3425	TargetScan	light
F37A4.8	FTVYQFEGENYK	2	762.853	1	739.326	y	6	29.251	42.3425	TargetScan	light
F37A4.8	FTVYQFEGENYK	2	762.853	1	1014.45	y	8	29.251	42.3425	TargetScan	light
F37A4.8	FTVYQFEGENYK	2	770.332	1	895.367	y	7	29.5053	42.3425	TargetScan	heavy
F37A4.8	FTVYQFEGENYK	2	770.332	1	1189.48	y	9	29.5053	42.3425	TargetScan	heavy
F37A4.8	FTVYQFEGENYK	2	770.332	1	617.262	y	5	29.5053	42.3425	TargetScan	heavy
F37A4.8	FTVYQFEGENYK	2	770.332	1	747.302	y	6	29.5053	42.3425	TargetScan	heavy
F37A4.8	FTVYQFEGENYK	2	770.332	1	1025.42	y	8	29.5053	42.3425	TargetScan	heavy
Y69E1A.2	VAANFSWFNNEYTK	2	845.896	1	1188.53	y	9	32.0745	49.7951	Random	light
Y69E1A.2	VAANFSWFNNEYTK	2	845.896	1	915.421	y	7	32.0745	49.7951	Random	light
Y69E1A.2	VAANFSWFNNEYTK	2	845.896	1	1101.5	y	8	32.0745	49.7951	Random	light
Y69E1A.2	VAANFSWFNNEYTK	2	845.896	1	768.353	y	6	32.0745	49.7951	Random	light
Y69E1A.2	VAANFSWFNNEYTK	2	845.896	1	1335.6	y	10	32.0745	49.7951	Random	light
Y69E1A.2	VAANFSWFNNEYTK	2	855.368	1	1201.49	y	9	32.3965	49.7951	Random	heavy
Y69E1A.2	VAANFSWFNNEYTK	2	855.368	1	925.391	y	7	32.3965	49.7951	Random	heavy
Y69E1A.2	VAANFSWFNNEYTK	2	855.368	1	1113.46	y	8	32.3965	49.7951	Random	heavy
Y69E1A.2	VAANFSWFNNEYTK	2	855.368	1	777.326	y	6	32.3965	49.7951	Random	heavy
Y69E1A.2	VAANFSWFNNEYTK	2	855.368	1	1349.56	y	10	32.3965	49.7951	Random	heavy
F54D11.1	LTDYFDVFR	2	588.29	1	961.442	y	7	23.3159	54.2113	Random	light
F54D11.1	LTDYFDVFR	2	588.29	1	683.352	y	5	23.3159	54.2113	Random	light
F54D11.1	LTDYFDVFR	2	588.29	1	1062.49	y	8	23.3159	54.2113	Random	light
F54D11.1	LTDYFDVFR	2	588.29	1	536.283	y	4	23.3159	54.2113	Random	light
F54D11.1	LTDYFDVFR	2	588.29	1	421.256	y	3	23.3159	54.2113	Random	light
F54D11.1	LTDYFDVFR	2	594.272	1	971.412	y	7	23.5193	54.2113	Random	heavy
F54D11.1	LTDYFDVFR	2	594.272	1	691.327	y	5	23.5193	54.2113	Random	heavy
F54D11.1	LTDYFDVFR	2	594.272	1	1073.46	y	8	23.5193	54.2113	Random	heavy
F54D11.1	LTDYFDVFR	2	594.272	1	543.262	y	4	23.5193	54.2113	Random	heavy
F54D11.1	LTDYFDVFR	2	594.272	1	427.238	y	3	23.5193	54.2113	Random	heavy
K01G5.4	SNYNFEKPFLWLAR	2	892.959	1	902.525	y	7	33.6746	55.9637	Random	light
K01G5.4	SNYNFEKPFLWLAR	2	892.959	1	1030.62	y	8	33.6746	55.9637	Random	light
K01G5.4	SNYNFEKPFLWLAR	2	892.959	1	1306.73	y	10	33.6746	55.9637	Random	light
K01G5.4	SNYNFEKPFLWLAR	2	892.959	2	515.814	y	8	33.6746	55.9637	Random	light
K01G5.4	SNYNFEKPFLWLAR	2	892.959	2	710.891	y	11	33.6746	55.9637	Random	light
K01G5.4	SNYNFEKPFLWLAR	2	903.428	1	913.492	y	7	34.0306	55.9637	Random	heavy
K01G5.4	SNYNFEKPFLWLAR	2	903.428	1	1043.58	y	8	34.0306	55.9637	Random	heavy
K01G5.4	SNYNFEKPFLWLAR	2	903.428	1	1321.69	y	10	34.0306	55.9637	Random	heavy
K01G5.4	SNYNFEKPFLWLAR	2	903.428	2	522.294	y	8	34.0306	55.9637	Random	heavy
K01G5.4	SNYNFEKPFLWLAR	2	903.428	2	719.365	y	11	34.0306	55.9637	Random	heavy
F37A4.8	LPQVFDFQFYPR	2	778.898	1	1119.53	y	8	29.7965	61.1612	TargetScan	light
F37A4.8	LPQVFDFQFYPR	2	778.898	1	857.431	y	6	29.7965	61.1612	TargetScan	light
F37A4.8	LPQVFDFQFYPR	2	778.898	1	972.458	y	7	29.7965	61.1612	TargetScan	light
F37A4.8	LPQVFDFQFYPR	2	778.898	1	582.304	y	4	29.7965	61.1612	TargetScan	light
F37A4.8	LPQVFDFQFYPR	2	778.898	1	1346.65	y	10	29.7965	61.1612	TargetScan	light
F37A4.8	LPQVFDFQFYPR	2	787.373	1	1131.49	y	8	30.0847	61.1612	TargetScan	heavy
F37A4.8	LPQVFDFQFYPR	2	787.373	1	867.401	y	6	30.0847	61.1612	TargetScan	heavy
F37A4.8	LPQVFDFQFYPR	2	787.373	1	983.425	y	7	30.0847	61.1612	TargetScan	heavy
F37A4.8	LPQVFDFQFYPR	2	787.373	1	589.283	y	4	30.0847	61.1612	TargetScan	heavy
F37A4.8	LPQVFDFQFYPR	2	787.373	1	1361.61	y	10	30.0847	61.1612	TargetScan	heavy
C30B5.7	LVAILFPIFYR	3	451.276	1	695.388	y	5	23.1701	74.4569	TargetScan	light
C30B5.7	LVAILFPIFYR	3	451.276	1	485.251	y	3	23.1701	74.4569	TargetScan	light
C30B5.7	LVAILFPIFYR	3	451.276	1	598.335	y	4	23.1701	74.4569	TargetScan	light
C30B5.7	LVAILFPIFYR	3	451.276	1	842.456	y	6	23.1701	74.4569	TargetScan	light
C30B5.7	LVAILFPIFYR	3	451.276	1	510.366	b	5	23.1701	74.4569	TargetScan	light
C30B5.7	LVAILFPIFYR	3	455.929	1	703.364	y	5	23.3749	74.4569	TargetScan	heavy
C30B5.7	LVAILFPIFYR	3	455.929	1	491.233	y	3	23.3749	74.4569	TargetScan	heavy
C30B5.7	LVAILFPIFYR	3	455.929	1	605.314	y	4	23.3749	74.4569	TargetScan	heavy
C30B5.7	LVAILFPIFYR	3	455.929	1	851.429	y	6	23.3749	74.4569	TargetScan	heavy
C30B5.7	LVAILFPIFYR	3	455.929	1	515.35	b	5	23.3749	74.4569	TargetScan	heavy
F47B7.2a	VAYVTQNHPIATK	2	721.393	1	1009.54	y	9	27.8414	25.2945	TargetScan	light
F47B7.2a	VAYVTQNHPIATK	2	721.393	1	529.335	y	5	27.8414	25.2945	TargetScan	light
F47B7.2a	VAYVTQNHPIATK	2	721.393	2	636.341	y	11	27.8414	25.2945	TargetScan	light
F47B7.2a	VAYVTQNHPIATK	2	721.393	1	780.437	y	7	27.8414	25.2945	TargetScan	light
F47B7.2a	VAYVTQNHPIATK	2	721.393	1	913.453	b	8	27.8414	25.2945	TargetScan	light
F47B7.2a	VAYVTQNHPIATK	2	730.367	1	1023.5	y	9	28.1465	25.2945	TargetScan	heavy
F47B7.2a	VAYVTQNHPIATK	2	730.367	1	535.317	y	5	28.1465	25.2945	TargetScan	heavy
F47B7.2a	VAYVTQNHPIATK	2	730.367	2	644.317	y	11	28.1465	25.2945	TargetScan	heavy
F47B7.2a	VAYVTQNHPIATK	2	730.367	1	791.404	y	7	28.1465	25.2945	TargetScan	heavy
F47B7.2a	VAYVTQNHPIATK	2	730.367	1	925.417	b	8	28.1465	25.2945	TargetScan	heavy
ZK616.4	VFAAPTQAER	2	545.287	1	701.358	y	6	21.8538	26.0414	TargetScan	light
ZK616.4	VFAAPTQAER	2	545.287	1	843.432	y	8	21.8538	26.0414	TargetScan	light
ZK616.4	VFAAPTQAER	2	545.287	1	772.395	y	7	21.8538	26.0414	TargetScan	light
ZK616.4	VFAAPTQAER	2	545.287	1	990.501	y	9	21.8538	26.0414	TargetScan	light
ZK616.4	VFAAPTQAER	2	545.287	1	604.305	y	5	21.8538	26.0414	TargetScan	light
ZK616.4	VFAAPTQAER	2	552.267	1	711.328	y	6	22.0911	26.0414	TargetScan	heavy
ZK616.4	VFAAPTQAER	2	552.267	1	855.396	y	8	22.0911	26.0414	TargetScan	heavy
ZK616.4	VFAAPTQAER	2	552.267	1	783.362	y	7	22.0911	26.0414	TargetScan	heavy
ZK616.4	VFAAPTQAER	2	552.267	1	1003.46	y	9	22.0911	26.0414	TargetScan	heavy
ZK616.4	VFAAPTQAER	2	552.267	1	613.278	y	5	22.0911	26.0414	TargetScan	heavy
F32D1.5	HYSVDEWK	2	532.245	1	763.363	y	6	21.4103	27.1603	Random	light
F32D1.5	HYSVDEWK	2	532.245	1	926.426	y	7	21.4103	27.1603	Random	light
F32D1.5	HYSVDEWK	2	532.245	1	731.3	b	6	21.4103	27.1603	Random	light
F32D1.5	HYSVDEWK	2	532.245	1	602.257	b	5	21.4103	27.1603	Random	light
F32D1.5	HYSVDEWK	2	532.245	1	462.235	y	3	21.4103	27.1603	Random	light
F32D1.5	HYSVDEWK	2	538.228	1	771.338	y	6	21.6138	27.1603	Random	heavy
F32D1.5	HYSVDEWK	2	538.228	1	935.399	y	7	21.6138	27.1603	Random	heavy
F32D1.5	HYSVDEWK	2	538.228	1	739.276	b	6	21.6138	27.1603	Random	heavy
F32D1.5	HYSVDEWK	2	538.228	1	609.236	b	5	21.6138	27.1603	Random	heavy
F32D1.5	HYSVDEWK	2	538.228	1	467.22	y	3	21.6138	27.1603	Random	heavy
F33A8.3	NGYGFINR	2	470.735	1	606.336	y	5	19.319	33.5609	Random	light
F33A8.3	NGYGFINR	2	470.735	1	549.315	y	4	19.319	33.5609	Random	light
F33A8.3	NGYGFINR	2	470.735	1	402.246	y	3	19.319	33.5609	Random	light
F33A8.3	NGYGFINR	2	470.735	1	769.4	y	6	19.319	33.5609	Random	light
F33A8.3	NGYGFINR	2	470.735	1	826.421	y	7	19.319	33.5609	Random	light
F33A8.3	NGYGFINR	2	477.216	1	615.309	y	5	19.5393	33.5609	Random	heavy
F33A8.3	NGYGFINR	2	477.216	1	557.291	y	4	19.5393	33.5609	Random	heavy
F33A8.3	NGYGFINR	2	477.216	1	409.225	y	3	19.5393	33.5609	Random	heavy
F33A8.3	NGYGFINR	2	477.216	1	779.369	y	6	19.5393	33.5609	Random	heavy
F33A8.3	NGYGFINR	2	477.216	1	837.388	y	7	19.5393	33.5609	Random	heavy
R11A8.5	NWNESVETFR	2	641.296	1	981.464	y	8	25.1181	36.8099	TargetScan	light
R11A8.5	NWNESVETFR	2	641.296	1	738.379	y	6	25.1181	36.8099	TargetScan	light
R11A8.5	NWNESVETFR	2	641.296	1	867.421	y	7	25.1181	36.8099	TargetScan	light
R11A8.5	NWNESVETFR	2	641.296	1	552.278	y	4	25.1181	36.8099	TargetScan	light
R11A8.5	NWNESVETFR	2	641.296	1	423.236	y	3	25.1181	36.8099	TargetScan	light
R11A8.5	NWNESVETFR	2	649.273	1	993.428	y	8	25.3893	36.8099	TargetScan	heavy
R11A8.5	NWNESVETFR	2	649.273	1	747.351	y	6	25.3893	36.8099	TargetScan	heavy
R11A8.5	NWNESVETFR	2	649.273	1	877.391	y	7	25.3893	36.8099	TargetScan	heavy
R11A8.5	NWNESVETFR	2	649.273	1	559.257	y	4	25.3893	36.8099	TargetScan	heavy
R11A8.5	NWNESVETFR	2	649.273	1	429.217	y	3	25.3893	36.8099	TargetScan	heavy
F54D11.1	VFAPTTDATITFR	2	720.38	1	1122.58	y	10	27.8069	42.5718	Random	light
F54D11.1	VFAPTTDATITFR	2	720.38	2	561.793	y	10	27.8069	42.5718	Random	light
F54D11.1	VFAPTTDATITFR	2	720.38	1	924.479	y	8	27.8069	42.5718	Random	light
F54D11.1	VFAPTTDATITFR	2	720.38	1	708.404	y	6	27.8069	42.5718	Random	light
F54D11.1	VFAPTTDATITFR	2	720.38	1	823.431	y	7	27.8069	42.5718	Random	light
F54D11.1	VFAPTTDATITFR	2	728.356	1	1135.54	y	10	28.0781	42.5718	Random	heavy
F54D11.1	VFAPTTDATITFR	2	728.356	2	568.274	y	10	28.0781	42.5718	Random	heavy
F54D11.1	VFAPTTDATITFR	2	728.356	1	935.446	y	8	28.0781	42.5718	Random	heavy
F54D11.1	VFAPTTDATITFR	2	728.356	1	717.377	y	6	28.0781	42.5718	Random	heavy
F54D11.1	VFAPTTDATITFR	2	728.356	1	833.401	y	7	28.0781	42.5718	Random	heavy
Y69E1A.2	VAANFSWFNNEYTK	3	564.266	1	768.353	y	6	28.1417	49.7951	Random	light
Y69E1A.2	VAANFSWFNNEYTK	3	564.266	1	915.421	y	7	28.1417	49.7951	Random	light
Y69E1A.2	VAANFSWFNNEYTK	3	564.266	1	654.31	y	5	28.1417	49.7951	Random	light
Y69E1A.2	VAANFSWFNNEYTK	3	564.266	1	411.224	y	3	28.1417	49.7951	Random	light
Y69E1A.2	VAANFSWFNNEYTK	3	564.266	2	458.214	y	7	28.1417	49.7951	Random	light
Y69E1A.2	VAANFSWFNNEYTK	3	570.581	1	777.326	y	6	28.4196	49.7951	Random	heavy
Y69E1A.2	VAANFSWFNNEYTK	3	570.581	1	925.391	y	7	28.4196	49.7951	Random	heavy
Y69E1A.2	VAANFSWFNNEYTK	3	570.581	1	661.289	y	5	28.4196	49.7951	Random	heavy
Y69E1A.2	VAANFSWFNNEYTK	3	570.581	1	415.212	y	3	28.4196	49.7951	Random	heavy
Y69E1A.2	VAANFSWFNNEYTK	3	570.581	2	463.199	y	7	28.4196	49.7951	Random	heavy
F46B6.3a	AIPILTLEQQIR	2	697.921	1	1000.58	y	8	27.0433	54.2161	Random	light
F46B6.3a	AIPILTLEQQIR	2	697.921	1	887.495	y	7	27.0433	54.2161	Random	light
F46B6.3a	AIPILTLEQQIR	2	697.921	2	605.862	y	10	27.0433	54.2161	Random	light
F46B6.3a	AIPILTLEQQIR	2	697.921	1	673.363	y	5	27.0433	54.2161	Random	light
F46B6.3a	AIPILTLEQQIR	2	697.921	1	786.447	y	6	27.0433	54.2161	Random	light
F46B6.3a	AIPILTLEQQIR	2	706.397	1	1013.54	y	8	27.3315	54.2161	Random	heavy
F46B6.3a	AIPILTLEQQIR	2	706.397	1	899.459	y	7	27.3315	54.2161	Random	heavy
F46B6.3a	AIPILTLEQQIR	2	706.397	2	613.339	y	10	27.3315	54.2161	Random	heavy
F46B6.3a	AIPILTLEQQIR	2	706.397	1	683.333	y	5	27.3315	54.2161	Random	heavy
F46B6.3a	AIPILTLEQQIR	2	706.397	1	797.414	y	6	27.3315	54.2161	Random	heavy
K01G5.4	SNYNFEKPFLWLAR	3	595.642	1	902.525	y	7	29.5222	55.9637	Random	light
K01G5.4	SNYNFEKPFLWLAR	3	595.642	1	545.32	y	4	29.5222	55.9637	Random	light
K01G5.4	SNYNFEKPFLWLAR	3	595.642	1	658.404	y	5	29.5222	55.9637	Random	light
K01G5.4	SNYNFEKPFLWLAR	3	595.642	2	792.422	y	12	29.5222	55.9637	Random	light
K01G5.4	SNYNFEKPFLWLAR	3	595.642	2	710.891	y	11	29.5222	55.9637	Random	light
K01G5.4	SNYNFEKPFLWLAR	3	602.621	1	913.492	y	7	29.8293	55.9637	Random	heavy
K01G5.4	SNYNFEKPFLWLAR	3	602.621	1	553.296	y	4	29.8293	55.9637	Random	heavy
K01G5.4	SNYNFEKPFLWLAR	3	602.621	1	667.377	y	5	29.8293	55.9637	Random	heavy
K01G5.4	SNYNFEKPFLWLAR	3	602.621	2	801.395	y	12	29.8293	55.9637	Random	heavy
K01G5.4	SNYNFEKPFLWLAR	3	602.621	2	719.365	y	11	29.8293	55.9637	Random	heavy
F27C1.2a	SAYAQAADNFLDELAGK	2	892.428	1	1263.62	y	12	33.6566	61.3624	TargetScan	light
F27C1.2a	SAYAQAADNFLDELAGK	2	892.428	1	1192.58	y	11	33.6566	61.3624	TargetScan	light
F27C1.2a	SAYAQAADNFLDELAGK	2	892.428	1	1121.55	y	10	33.6566	61.3624	TargetScan	light
F27C1.2a	SAYAQAADNFLDELAGK	2	892.428	1	1006.52	y	9	33.6566	61.3624	TargetScan	light
F27C1.2a	SAYAQAADNFLDELAGK	2	892.428	1	632.326	y	6	33.6566	61.3624	TargetScan	light
F27C1.2a	SAYAQAADNFLDELAGK	2	902.399	1	1277.58	y	12	33.9956	61.3624	TargetScan	heavy
F27C1.2a	SAYAQAADNFLDELAGK	2	902.399	1	1205.55	y	11	33.9956	61.3624	TargetScan	heavy
F27C1.2a	SAYAQAADNFLDELAGK	2	902.399	1	1133.51	y	10	33.9956	61.3624	TargetScan	heavy
F27C1.2a	SAYAQAADNFLDELAGK	2	902.399	1	1017.49	y	9	33.9956	61.3624	TargetScan	heavy
F27C1.2a	SAYAQAADNFLDELAGK	2	902.399	1	639.304	y	6	33.9956	61.3624	TargetScan	heavy
B0464.8	DIISEIVGNALLER	2	771.43	1	984.584	y	9	29.5426	74.5778	TargetScan	light
B0464.8	DIISEIVGNALLER	2	771.43	1	871.5	y	8	29.5426	74.5778	TargetScan	light
B0464.8	DIISEIVGNALLER	2	771.43	1	1200.66	y	11	29.5426	74.5778	TargetScan	light
B0464.8	DIISEIVGNALLER	2	771.43	1	1113.63	y	10	29.5426	74.5778	TargetScan	light
B0464.8	DIISEIVGNALLER	2	771.43	1	558.278	b	5	29.5426	74.5778	TargetScan	light
B0464.8	DIISEIVGNALLER	2	780.404	1	997.545	y	9	29.8477	74.5778	TargetScan	heavy
B0464.8	DIISEIVGNALLER	2	780.404	1	883.464	y	8	29.8477	74.5778	TargetScan	heavy
B0464.8	DIISEIVGNALLER	2	780.404	1	1215.61	y	11	29.8477	74.5778	TargetScan	heavy
B0464.8	DIISEIVGNALLER	2	780.404	1	1127.58	y	10	29.8477	74.5778	TargetScan	heavy
B0464.8	DIISEIVGNALLER	2	780.404	1	563.262	b	5	29.8477	74.5778	TargetScan	heavy
F30H5.1	IGAAGGDDISK	2	496.256	1	890.422	y	10	20.1867	24.0944	TargetScan	light
F30H5.1	IGAAGGDDISK	2	496.256	1	693.326	y	7	20.1867	24.0944	TargetScan	light
F30H5.1	IGAAGGDDISK	2	496.256	1	761.363	y	8	20.1867	24.0944	TargetScan	light
F30H5.1	IGAAGGDDISK	2	496.256	1	632.305	y	6	20.1867	24.0944	TargetScan	light
F30H5.1	IGAAGGDDISK	2	496.256	1	830.401	y	9	20.1867	24.0944	TargetScan	light
F30H5.1	IGAAGGDDISK	2	502.239	1	905.389	y	10	20.3901	24.0944	TargetScan	heavy
F30H5.1	IGAAGGDDISK	2	502.239	1	703.302	y	7	20.3901	24.0944	TargetScan	heavy
F30H5.1	IGAAGGDDISK	2	502.239	1	771.336	y	8	20.3901	24.0944	TargetScan	heavy
F30H5.1	IGAAGGDDISK	2	502.239	1	638.283	y	6	20.3901	24.0944	TargetScan	heavy
F30H5.1	IGAAGGDDISK	2	502.239	1	847.37	y	9	20.3901	24.0944	TargetScan	heavy
C47G2.2	DDDDDDDSTSR	2	624.213	1	678.285	y	6	24.5372	26.0212	TargetScan	light
C47G2.2	DDDDDDDSTSR	2	624.213	1	568.258	y	5	24.5372	26.0212	TargetScan	light
C47G2.2	DDDDDDDSTSR	2	624.213	1	792.312	y	7	24.5372	26.0212	TargetScan	light
C47G2.2	DDDDDDDSTSR	2	624.213	1	1029.37	y	9	24.5372	26.0212	TargetScan	light
C47G2.2	DDDDDDDSTSR	2	624.213	1	575.143	b	5	24.5372	26.0212	TargetScan	light
C47G2.2	DDDDDDDSTSR	2	631.193	1	690.258	y	6	24.7745	26.0212	TargetScan	heavy
C47G2.2	DDDDDDDSTSR	2	631.193	1	571.234	y	5	24.7745	26.0212	TargetScan	heavy
C47G2.2	DDDDDDDSTSR	2	631.193	1	809.282	y	7	24.7745	26.0212	TargetScan	heavy
C47G2.2	DDDDDDDSTSR	2	631.193	1	1040.33	y	9	24.7745	26.0212	TargetScan	heavy
C47G2.2	DDDDDDDSTSR	2	631.193	1	584.127	b	5	24.7745	26.0212	TargetScan	heavy
F32D1.5	HYSVDEWK	2	529.245	1	766.363	y	6	21.3083	27.1603	Random	light
F32D1.5	HYSVDEWK	2	529.245	1	930.426	y	7	21.3083	27.1603	Random	light
F32D1.5	HYSVDEWK	2	529.245	1	735.3	b	6	21.3083	27.1603	Random	light
F32D1.5	HYSVDEWK	2	529.245	1	605.257	b	5	21.3083	27.1603	Random	light
F32D1.5	HYSVDEWK	2	529.245	1	460.235	y	3	21.3083	27.1603	Random	light
F32D1.5	HYSVDEWK	2	535.228	1	775.338	y	6	21.5118	27.1603	Random	heavy
F32D1.5	HYSVDEWK	2	535.228	1	930.399	y	7	21.5118	27.1603	Random	heavy
F32D1.5	HYSVDEWK	2	535.228	1	737.276	b	6	21.5118	27.1603	Random	heavy
F32D1.5	HYSVDEWK	2	535.228	1	607.236	b	5	21.5118	27.1603	Random	heavy
F32D1.5	HYSVDEWK	2	535.228	1	471.22	y	3	21.5118	27.1603	Random	heavy
F13G3.10	HNWGSEELSK	2	593.777	1	935.447	y	8	23.5024	25.4046	Random	light
F13G3.10	HNWGSEELSK	2	593.777	1	1049.49	y	9	23.5024	25.4046	Random	light
F13G3.10	HNWGSEELSK	2	593.777	1	749.368	y	7	23.5024	25.4046	Random	light
F13G3.10	HNWGSEELSK	2	593.777	1	840.328	b	7	23.5024	25.4046	Random	light
F13G3.10	HNWGSEELSK	2	593.777	1	476.272	y	4	23.5024	25.4046	Random	light
F13G3.10	HNWGSEELSK	2	601.256	1	945.417	y	8	23.7567	25.4046	Random	heavy
F13G3.10	HNWGSEELSK	2	601.256	1	1061.45	y	9	23.7567	25.4046	Random	heavy
F13G3.10	HNWGSEELSK	2	601.256	1	757.344	y	7	23.7567	25.4046	Random	heavy
F13G3.10	HNWGSEELSK	2	601.256	1	851.294	b	7	23.7567	25.4046	Random	heavy
F13G3.10	HNWGSEELSK	2	601.256	1	481.257	y	4	23.7567	25.4046	Random	heavy
F56D3.1	NNVVANEPVR	2	556.296	1	784.432	y	7	22.2281	26.0746	TargetScan	light
F56D3.1	NNVVANEPVR	2	556.296	1	685.363	y	6	22.2281	26.0746	TargetScan	light
F56D3.1	NNVVANEPVR	2	556.296	1	614.326	y	5	22.2281	26.0746	TargetScan	light
F56D3.1	NNVVANEPVR	2	556.296	1	883.5	y	8	22.2281	26.0746	TargetScan	light
F56D3.1	NNVVANEPVR	2	556.296	1	500.283	y	4	22.2281	26.0746	TargetScan	light
F56D3.1	NNVVANEPVR	2	564.273	1	795.399	y	7	22.4993	26.0746	TargetScan	heavy
F56D3.1	NNVVANEPVR	2	564.273	1	695.333	y	6	22.4993	26.0746	TargetScan	heavy
F56D3.1	NNVVANEPVR	2	564.273	1	623.299	y	5	22.4993	26.0746	TargetScan	heavy
F56D3.1	NNVVANEPVR	2	564.273	1	895.464	y	8	22.4993	26.0746	TargetScan	heavy
F56D3.1	NNVVANEPVR	2	564.273	1	507.262	y	4	22.4993	26.0746	TargetScan	heavy
R11A8.5	VQNDVLLSR	2	522.295	1	816.458	y	7	21.072	28.3239	TargetScan	light
R11A8.5	VQNDVLLSR	2	522.295	1	488.32	y	4	21.072	28.3239	TargetScan	light
R11A8.5	VQNDVLLSR	2	522.295	1	587.388	y	5	21.072	28.3239	TargetScan	light
R11A8.5	VQNDVLLSR	2	522.295	1	702.415	y	6	21.072	28.3239	TargetScan	light
R11A8.5	VQNDVLLSR	2	522.295	1	944.517	y	8	21.072	28.3239	TargetScan	light
R11A8.5	VQNDVLLSR	2	529.275	1	827.425	y	7	21.3094	28.3239	TargetScan	heavy
R11A8.5	VQNDVLLSR	2	529.275	1	495.298	y	4	21.3094	28.3239	TargetScan	heavy
R11A8.5	VQNDVLLSR	2	529.275	1	595.364	y	5	21.3094	28.3239	TargetScan	heavy
R11A8.5	VQNDVLLSR	2	529.275	1	711.388	y	6	21.3094	28.3239	TargetScan	heavy
R11A8.5	VQNDVLLSR	2	529.275	1	957.477	y	8	21.3094	28.3239	TargetScan	heavy
F40F8.5	QQDDILALQK	2	586.319	1	572.377	y	5	23.2488	33.767	TargetScan	light
F40F8.5	QQDDILALQK	2	586.319	1	459.293	y	4	23.2488	33.767	TargetScan	light
F40F8.5	QQDDILALQK	2	586.319	1	915.515	y	8	23.2488	33.767	TargetScan	light
F40F8.5	QQDDILALQK	2	586.319	1	685.461	y	6	23.2488	33.767	TargetScan	light
F40F8.5	QQDDILALQK	2	586.319	1	388.256	y	3	23.2488	33.767	TargetScan	light
F40F8.5	QQDDILALQK	2	593.299	1	579.356	y	5	23.4862	33.767	TargetScan	heavy
F40F8.5	QQDDILALQK	2	593.299	1	465.275	y	4	23.4862	33.767	TargetScan	heavy
F40F8.5	QQDDILALQK	2	593.299	1	925.485	y	8	23.4862	33.767	TargetScan	heavy
F40F8.5	QQDDILALQK	2	593.299	1	693.437	y	6	23.4862	33.767	TargetScan	heavy
F40F8.5	QQDDILALQK	2	593.299	1	393.241	y	3	23.4862	33.767	TargetScan	heavy
K01G5.4	FNVWDTAGQEK	2	647.806	1	934.427	y	8	25.3394	37.6402	Random	light
K01G5.4	FNVWDTAGQEK	2	647.806	1	748.348	y	7	25.3394	37.6402	Random	light
K01G5.4	FNVWDTAGQEK	2	647.806	1	633.321	y	6	25.3394	37.6402	Random	light
K01G5.4	FNVWDTAGQEK	2	647.806	1	1033.5	y	9	25.3394	37.6402	Random	light
K01G5.4	FNVWDTAGQEK	2	647.806	1	461.236	y	4	25.3394	37.6402	Random	light
K01G5.4	FNVWDTAGQEK	2	655.285	1	945.394	y	8	25.5937	37.6402	Random	heavy
K01G5.4	FNVWDTAGQEK	2	655.285	1	757.32	y	7	25.5937	37.6402	Random	heavy
K01G5.4	FNVWDTAGQEK	2	655.285	1	641.296	y	6	25.5937	37.6402	Random	heavy
K01G5.4	FNVWDTAGQEK	2	655.285	1	1045.46	y	9	25.5937	37.6402	Random	heavy
K01G5.4	FNVWDTAGQEK	2	655.285	1	467.218	y	4	25.5937	37.6402	Random	heavy
F54D11.1	VFAPTTDATITFR	3	480.589	1	423.236	y	3	24.4599	42.5718	Random	light
F54D11.1	VFAPTTDATITFR	3	480.589	1	536.32	y	4	24.4599	42.5718	Random	light
F54D11.1	VFAPTTDATITFR	3	480.589	1	637.367	y	5	24.4599	42.5718	Random	light
F54D11.1	VFAPTTDATITFR	3	480.589	1	708.404	y	6	24.4599	42.5718	Random	light
F54D11.1	VFAPTTDATITFR	3	480.589	1	924.479	y	8	24.4599	42.5718	Random	light
F54D11.1	VFAPTTDATITFR	3	485.907	1	429.217	y	3	24.6939	42.5718	Random	heavy
F54D11.1	VFAPTTDATITFR	3	485.907	1	543.298	y	4	24.6939	42.5718	Random	heavy
F54D11.1	VFAPTTDATITFR	3	485.907	1	645.343	y	5	24.6939	42.5718	Random	heavy
F54D11.1	VFAPTTDATITFR	3	485.907	1	717.377	y	6	24.6939	42.5718	Random	heavy
F54D11.1	VFAPTTDATITFR	3	485.907	1	935.446	y	8	24.6939	42.5718	Random	heavy
F18A1.5	SDSIIEAGGELLAAPK	2	785.919	1	1055.57	y	11	30.0352	50.127	TargetScan	light
F18A1.5	SDSIIEAGGELLAAPK	2	785.919	2	387.188	b	8	30.0352	50.127	TargetScan	light
F18A1.5	SDSIIEAGGELLAAPK	2	785.919	1	612.408	y	6	30.0352	50.127	TargetScan	light
F18A1.5	SDSIIEAGGELLAAPK	2	785.919	1	855.494	y	9	30.0352	50.127	TargetScan	light
F18A1.5	SDSIIEAGGELLAAPK	2	785.919	1	926.531	y	10	30.0352	50.127	TargetScan	light
F18A1.5	SDSIIEAGGELLAAPK	2	794.395	1	1067.54	y	11	30.3234	50.127	TargetScan	heavy
F18A1.5	SDSIIEAGGELLAAPK	2	794.395	2	391.176	b	8	30.3234	50.127	TargetScan	heavy
F18A1.5	SDSIIEAGGELLAAPK	2	794.395	1	619.387	y	6	30.3234	50.127	TargetScan	heavy
F18A1.5	SDSIIEAGGELLAAPK	2	794.395	1	865.464	y	9	30.3234	50.127	TargetScan	heavy
F18A1.5	SDSIIEAGGELLAAPK	2	794.395	1	937.498	y	10	30.3234	50.127	TargetScan	heavy
C02F5.4	IVNLLYVANDVSQNAR	2	894.983	1	1236.6	y	11	33.7434	54.4114	TargetScan	light
C02F5.4	IVNLLYVANDVSQNAR	2	894.983	1	1073.53	y	10	33.7434	54.4114	TargetScan	light
C02F5.4	IVNLLYVANDVSQNAR	2	894.983	1	974.466	y	9	33.7434	54.4114	TargetScan	light
C02F5.4	IVNLLYVANDVSQNAR	2	894.983	1	440.287	b	4	33.7434	54.4114	TargetScan	light
C02F5.4	IVNLLYVANDVSQNAR	2	894.983	1	575.29	y	5	33.7434	54.4114	TargetScan	light
C02F5.4	IVNLLYVANDVSQNAR	2	906.45	1	1253.55	y	11	34.1333	54.4114	TargetScan	heavy
C02F5.4	IVNLLYVANDVSQNAR	2	906.45	1	1089.49	y	10	34.1333	54.4114	TargetScan	heavy
C02F5.4	IVNLLYVANDVSQNAR	2	906.45	1	989.421	y	9	34.1333	54.4114	TargetScan	heavy
C02F5.4	IVNLLYVANDVSQNAR	2	906.45	1	445.272	b	4	34.1333	54.4114	TargetScan	heavy
C02F5.4	IVNLLYVANDVSQNAR	2	906.45	1	585.26	y	5	34.1333	54.4114	TargetScan	heavy
F17C8.3	LLIPAGALWGANDIQK	2	840.477	1	1340.7	y	13	31.8902	56.2976	Random	light
F17C8.3	LLIPAGALWGANDIQK	2	840.477	2	670.852	y	13	31.8902	56.2976	Random	light
F17C8.3	LLIPAGALWGANDIQK	2	840.477	1	745.384	y	7	31.8902	56.2976	Random	light
F17C8.3	LLIPAGALWGANDIQK	2	840.477	1	931.464	y	8	31.8902	56.2976	Random	light
F17C8.3	LLIPAGALWGANDIQK	2	840.477	1	1044.55	y	9	31.8902	56.2976	Random	light
F17C8.3	LLIPAGALWGANDIQK	2	850.448	1	1357.65	y	13	32.2292	56.2976	Random	heavy
F17C8.3	LLIPAGALWGANDIQK	2	850.448	2	679.326	y	13	32.2292	56.2976	Random	heavy
F17C8.3	LLIPAGALWGANDIQK	2	850.448	1	755.354	y	7	32.2292	56.2976	Random	heavy
F17C8.3	LLIPAGALWGANDIQK	2	850.448	1	943.428	y	8	32.2292	56.2976	Random	heavy
F17C8.3	LLIPAGALWGANDIQK	2	850.448	1	1057.51	y	9	32.2292	56.2976	Random	heavy
R12E2.11	NENLLVTDAIAVLDR	2	828.451	1	1072.6	y	10	31.4813	67.6424	Random	light
R12E2.11	NENLLVTDAIAVLDR	2	828.451	1	973.532	y	9	31.4813	67.6424	Random	light
R12E2.11	NENLLVTDAIAVLDR	2	828.451	1	1185.68	y	11	31.4813	67.6424	Random	light
R12E2.11	NENLLVTDAIAVLDR	2	828.451	1	471.22	b	4	31.4813	67.6424	Random	light
R12E2.11	NENLLVTDAIAVLDR	2	828.451	1	573.336	y	5	31.4813	67.6424	Random	light
R12E2.11	NENLLVTDAIAVLDR	2	838.422	1	1085.56	y	10	31.8204	67.6424	Random	heavy
R12E2.11	NENLLVTDAIAVLDR	2	838.422	1	985.496	y	9	31.8204	67.6424	Random	heavy
R12E2.11	NENLLVTDAIAVLDR	2	838.422	1	1199.64	y	11	31.8204	67.6424	Random	heavy
R12E2.11	NENLLVTDAIAVLDR	2	838.422	1	477.202	b	4	31.8204	67.6424	Random	heavy
R12E2.11	NENLLVTDAIAVLDR	2	838.422	1	581.312	y	5	31.8204	67.6424	Random	heavy
C48B4.8	FVIVPPTFLWWPAK	2	850.981	1	1242.67	y	10	32.2474	75.7628	Random	light
C48B4.8	FVIVPPTFLWWPAK	2	850.981	2	621.837	y	10	32.2474	75.7628	Random	light
C48B4.8	FVIVPPTFLWWPAK	2	850.981	1	459.297	b	4	32.2474	75.7628	Random	light
C48B4.8	FVIVPPTFLWWPAK	2	850.981	1	1145.61	y	9	32.2474	75.7628	Random	light
C48B4.8	FVIVPPTFLWWPAK	2	850.981	1	501.283	y	4	32.2474	75.7628	Random	light
C48B4.8	FVIVPPTFLWWPAK	2	859.457	1	1255.63	y	10	32.5355	75.7628	Random	heavy
C48B4.8	FVIVPPTFLWWPAK	2	859.457	2	628.318	y	10	32.5355	75.7628	Random	heavy
C48B4.8	FVIVPPTFLWWPAK	2	859.457	1	463.285	b	4	32.5355	75.7628	Random	heavy
C48B4.8	FVIVPPTFLWWPAK	2	859.457	1	1157.58	y	9	32.5355	75.7628	Random	heavy
C48B4.8	FVIVPPTFLWWPAK	2	859.457	1	507.264	y	4	32.5355	75.7628	Random	heavy
F18A1.5	YHQVLTSPEVKPR	2	777.425	1	1125.66	y	10	29.7464	25.4107	TargetScan	light
F18A1.5	YHQVLTSPEVKPR	2	777.425	1	1026.59	y	9	29.7464	25.4107	TargetScan	light
F18A1.5	YHQVLTSPEVKPR	2	777.425	1	913.511	y	8	29.7464	25.4107	TargetScan	light
F18A1.5	YHQVLTSPEVKPR	2	777.425	1	429.189	b	3	29.7464	25.4107	TargetScan	light
F18A1.5	YHQVLTSPEVKPR	2	777.425	1	1253.72	y	11	29.7464	25.4107	TargetScan	light
F18A1.5	YHQVLTSPEVKPR	2	787.396	1	1139.62	y	10	30.0855	25.4107	TargetScan	heavy
F18A1.5	YHQVLTSPEVKPR	2	787.396	1	1039.56	y	9	30.0855	25.4107	TargetScan	heavy
F18A1.5	YHQVLTSPEVKPR	2	787.396	1	925.475	y	8	30.0855	25.4107	TargetScan	heavy
F18A1.5	YHQVLTSPEVKPR	2	787.396	1	435.17	b	3	30.0855	25.4107	TargetScan	heavy
F18A1.5	YHQVLTSPEVKPR	2	787.396	1	1269.67	y	11	30.0855	25.4107	TargetScan	heavy
ZK418.9a	IQFKPDTNPNSEDR	2	830.899	1	1144.49	y	10	31.5646	26.3187	TargetScan	light
ZK418.9a	IQFKPDTNPNSEDR	2	830.899	1	932.407	y	8	31.5646	26.3187	TargetScan	light
ZK418.9a	IQFKPDTNPNSEDR	2	830.899	1	717.317	y	6	31.5646	26.3187	TargetScan	light
ZK418.9a	IQFKPDTNPNSEDR	2	830.899	1	729.394	b	6	31.5646	26.3187	TargetScan	light
ZK418.9a	IQFKPDTNPNSEDR	2	830.899	2	710.329	y	12	31.5646	26.3187	TargetScan	light
ZK418.9a	IQFKPDTNPNSEDR	2	841.369	1	1159.44	y	10	31.9205	26.3187	TargetScan	heavy
ZK418.9a	IQFKPDTNPNSEDR	2	841.369	1	945.368	y	8	31.9205	26.3187	TargetScan	heavy
ZK418.9a	IQFKPDTNPNSEDR	2	841.369	1	727.287	y	6	31.9205	26.3187	TargetScan	heavy
ZK418.9a	IQFKPDTNPNSEDR	2	841.369	1	737.369	b	6	31.9205	26.3187	TargetScan	heavy
ZK418.9a	IQFKPDTNPNSEDR	2	841.369	2	719.302	y	12	31.9205	26.3187	TargetScan	heavy
F27C1.2a	EVEAVPVPDEK	2	606.311	1	684.357	y	6	23.9286	28.4311	TargetScan	light
F27C1.2a	EVEAVPVPDEK	2	606.311	1	488.236	y	4	23.9286	28.4311	TargetScan	light
F27C1.2a	EVEAVPVPDEK	2	606.311	2	411.224	b	8	23.9286	28.4311	TargetScan	light
F27C1.2a	EVEAVPVPDEK	2	606.311	1	983.505	y	9	23.9286	28.4311	TargetScan	light
F27C1.2a	EVEAVPVPDEK	2	606.311	1	854.462	y	8	23.9286	28.4311	TargetScan	light
F27C1.2a	EVEAVPVPDEK	2	612.294	1	691.336	y	6	24.132	28.4311	TargetScan	heavy
F27C1.2a	EVEAVPVPDEK	2	612.294	1	493.22	y	4	24.132	28.4311	TargetScan	heavy
F27C1.2a	EVEAVPVPDEK	2	612.294	2	415.212	b	8	24.132	28.4311	TargetScan	heavy
F27C1.2a	EVEAVPVPDEK	2	612.294	1	993.475	y	9	24.132	28.4311	TargetScan	heavy
F27C1.2a	EVEAVPVPDEK	2	612.294	1	863.435	y	8	24.132	28.4311	TargetScan	heavy
F56D3.1	IYVGTIDGVR	2	546.805	1	816.458	y	8	21.9054	34.3026	TargetScan	light
F56D3.1	IYVGTIDGVR	2	546.805	1	717.39	y	7	21.9054	34.3026	TargetScan	light
F56D3.1	IYVGTIDGVR	2	546.805	1	979.521	y	9	21.9054	34.3026	TargetScan	light
F56D3.1	IYVGTIDGVR	2	546.805	1	660.368	y	6	21.9054	34.3026	TargetScan	light
F56D3.1	IYVGTIDGVR	2	546.805	1	559.32	y	5	21.9054	34.3026	TargetScan	light
F56D3.1	IYVGTIDGVR	2	553.287	1	827.425	y	8	22.1257	34.3026	TargetScan	heavy
F56D3.1	IYVGTIDGVR	2	553.287	1	727.359	y	7	22.1257	34.3026	TargetScan	heavy
F56D3.1	IYVGTIDGVR	2	553.287	1	991.485	y	9	22.1257	34.3026	TargetScan	heavy
F56D3.1	IYVGTIDGVR	2	553.287	1	669.341	y	6	22.1257	34.3026	TargetScan	heavy
F56D3.1	IYVGTIDGVR	2	553.287	1	567.296	y	5	22.1257	34.3026	TargetScan	heavy
D1007.6	THPNIEGVSNLEVIK	2	825.446	2	706.393	y	13	31.3792	37.6747	Random	light
D1007.6	THPNIEGVSNLEVIK	2	825.446	1	958.557	y	9	31.3792	37.6747	Random	light
D1007.6	THPNIEGVSNLEVIK	2	825.446	1	1087.6	y	10	31.3792	37.6747	Random	light
D1007.6	THPNIEGVSNLEVIK	2	825.446	1	802.467	y	7	31.3792	37.6747	Random	light
D1007.6	THPNIEGVSNLEVIK	2	825.446	1	1200.68	y	11	31.3792	37.6747	Random	light
D1007.6	THPNIEGVSNLEVIK	2	835.417	2	714.369	y	13	31.7182	37.6747	Random	heavy
D1007.6	THPNIEGVSNLEVIK	2	835.417	1	969.524	y	9	31.7182	37.6747	Random	heavy
D1007.6	THPNIEGVSNLEVIK	2	835.417	1	1099.56	y	10	31.7182	37.6747	Random	heavy
D1007.6	THPNIEGVSNLEVIK	2	835.417	1	811.44	y	7	31.7182	37.6747	Random	heavy
D1007.6	THPNIEGVSNLEVIK	2	835.417	1	1213.64	y	11	31.7182	37.6747	Random	heavy
F17C8.3	LGSPLFEINEK	2	623.837	1	779.394	y	6	24.5245	43.6882	Random	light
F17C8.3	LGSPLFEINEK	2	623.837	2	495.269	y	8	24.5245	43.6882	Random	light
F17C8.3	LGSPLFEINEK	2	623.837	1	989.531	y	8	24.5245	43.6882	Random	light
F17C8.3	LGSPLFEINEK	2	623.837	1	892.478	y	7	24.5245	43.6882	Random	light
F17C8.3	LGSPLFEINEK	2	623.837	1	503.283	y	4	24.5245	43.6882	Random	light
F17C8.3	LGSPLFEINEK	2	630.318	1	787.37	y	6	24.7448	43.6882	Random	heavy
F17C8.3	LGSPLFEINEK	2	630.318	2	500.254	y	8	24.7448	43.6882	Random	heavy
F17C8.3	LGSPLFEINEK	2	630.318	1	999.501	y	8	24.7448	43.6882	Random	heavy
F17C8.3	LGSPLFEINEK	2	630.318	1	901.451	y	7	24.7448	43.6882	Random	heavy
F17C8.3	LGSPLFEINEK	2	630.318	1	509.265	y	4	24.7448	43.6882	Random	heavy
F18A1.5	SDSIIEAGGELLAAPK	3	524.282	1	499.324	y	5	26.3824	50.127	TargetScan	light
F18A1.5	SDSIIEAGGELLAAPK	3	524.282	1	612.408	y	6	26.3824	50.127	TargetScan	light
F18A1.5	SDSIIEAGGELLAAPK	3	524.282	1	386.24	y	4	26.3824	50.127	TargetScan	light
F18A1.5	SDSIIEAGGELLAAPK	3	524.282	1	855.494	y	9	26.3824	50.127	TargetScan	light
F18A1.5	SDSIIEAGGELLAAPK	3	524.282	1	926.531	y	10	26.3824	50.127	TargetScan	light
F18A1.5	SDSIIEAGGELLAAPK	3	529.932	1	505.306	y	5	26.631	50.127	TargetScan	heavy
F18A1.5	SDSIIEAGGELLAAPK	3	529.932	1	619.387	y	6	26.631	50.127	TargetScan	heavy
F18A1.5	SDSIIEAGGELLAAPK	3	529.932	1	391.225	y	4	26.631	50.127	TargetScan	heavy
F18A1.5	SDSIIEAGGELLAAPK	3	529.932	1	865.464	y	9	26.631	50.127	TargetScan	heavy
F18A1.5	SDSIIEAGGELLAAPK	3	529.932	1	937.498	y	10	26.631	50.127	TargetScan	heavy
Y66H1A.4	IPYFNAPIYFK	2	686.868	1	999.53	y	8	26.6675	54.482	Random	light
Y66H1A.4	IPYFNAPIYFK	2	686.868	2	630.327	y	10	26.6675	54.482	Random	light
Y66H1A.4	IPYFNAPIYFK	2	686.868	1	667.382	y	5	26.6675	54.482	Random	light
Y66H1A.4	IPYFNAPIYFK	2	686.868	1	1162.59	y	9	26.6675	54.482	Random	light
Y66H1A.4	IPYFNAPIYFK	2	686.868	1	852.462	y	7	26.6675	54.482	Random	light
Y66H1A.4	IPYFNAPIYFK	2	693.349	1	1009.5	y	8	26.8879	54.482	Random	heavy
Y66H1A.4	IPYFNAPIYFK	2	693.349	2	636.309	y	10	26.8879	54.482	Random	heavy
Y66H1A.4	IPYFNAPIYFK	2	693.349	1	673.364	y	5	26.8879	54.482	Random	heavy
Y66H1A.4	IPYFNAPIYFK	2	693.349	1	1173.56	y	9	26.8879	54.482	Random	heavy
Y66H1A.4	IPYFNAPIYFK	2	693.349	1	861.435	y	7	26.8879	54.482	Random	heavy
D1007.6	LIYEYLFNEGVTVAK	2	879.969	1	964.51	y	9	33.2329	57.9772	Random	light
D1007.6	LIYEYLFNEGVTVAK	2	879.969	1	1077.59	y	10	33.2329	57.9772	Random	light
D1007.6	LIYEYLFNEGVTVAK	2	879.969	1	817.442	y	8	33.2329	57.9772	Random	light
D1007.6	LIYEYLFNEGVTVAK	2	879.969	1	574.356	y	6	33.2329	57.9772	Random	light
D1007.6	LIYEYLFNEGVTVAK	2	879.969	1	1240.66	y	11	33.2329	57.9772	Random	light
D1007.6	LIYEYLFNEGVTVAK	2	888.444	1	975.477	y	9	33.5211	57.9772	Random	heavy
D1007.6	LIYEYLFNEGVTVAK	2	888.444	1	1089.56	y	10	33.5211	57.9772	Random	heavy
D1007.6	LIYEYLFNEGVTVAK	2	888.444	1	827.412	y	8	33.5211	57.9772	Random	heavy
D1007.6	LIYEYLFNEGVTVAK	2	888.444	1	581.335	y	6	33.5211	57.9772	Random	heavy
D1007.6	LIYEYLFNEGVTVAK	2	888.444	1	1253.62	y	11	33.5211	57.9772	Random	heavy
R12E2.11	NENLLVTDAIAVLDR	3	552.637	1	573.336	y	5	27.63	67.6424	Random	light
R12E2.11	NENLLVTDAIAVLDR	3	552.637	1	502.299	y	4	27.63	67.6424	Random	light
R12E2.11	NENLLVTDAIAVLDR	3	552.637	1	471.22	b	4	27.63	67.6424	Random	light
R12E2.11	NENLLVTDAIAVLDR	3	552.637	1	584.304	b	5	27.63	67.6424	Random	light
R12E2.11	NENLLVTDAIAVLDR	3	552.637	1	686.42	y	6	27.63	67.6424	Random	light
R12E2.11	NENLLVTDAIAVLDR	3	559.284	1	581.312	y	5	27.9225	67.6424	Random	heavy
R12E2.11	NENLLVTDAIAVLDR	3	559.284	1	509.278	y	4	27.9225	67.6424	Random	heavy
R12E2.11	NENLLVTDAIAVLDR	3	559.284	1	477.202	b	4	27.9225	67.6424	Random	heavy
R12E2.11	NENLLVTDAIAVLDR	3	559.284	1	591.283	b	5	27.9225	67.6424	Random	heavy
R12E2.11	NENLLVTDAIAVLDR	3	559.284	1	695.393	y	6	27.9225	67.6424	Random	heavy
C48B4.8	FVIVPPTFLWWPAK	3	567.657	1	687.362	y	5	28.2909	75.7628	Random	light
C48B4.8	FVIVPPTFLWWPAK	3	567.657	2	621.837	y	10	28.2909	75.7628	Random	light
C48B4.8	FVIVPPTFLWWPAK	3	567.657	1	501.283	y	4	28.2909	75.7628	Random	light
C48B4.8	FVIVPPTFLWWPAK	3	567.657	1	800.446	y	6	28.2909	75.7628	Random	light
C48B4.8	FVIVPPTFLWWPAK	3	567.657	1	947.514	y	7	28.2909	75.7628	Random	light
C48B4.8	FVIVPPTFLWWPAK	3	573.307	1	695.338	y	5	28.5395	75.7628	Random	heavy
C48B4.8	FVIVPPTFLWWPAK	3	573.307	2	628.318	y	10	28.5395	75.7628	Random	heavy
C48B4.8	FVIVPPTFLWWPAK	3	573.307	1	507.264	y	4	28.5395	75.7628	Random	heavy
C48B4.8	FVIVPPTFLWWPAK	3	573.307	1	809.419	y	6	28.5395	75.7628	Random	heavy
C48B4.8	FVIVPPTFLWWPAK	3	573.307	1	957.484	y	7	28.5395	75.7628	Random	heavy
F18A1.5	YHQVLTSPEVKPR	2	774.425	1	1128.66	y	10	29.6444	25.4107	TargetScan	light
F18A1.5	YHQVLTSPEVKPR	2	774.425	1	1030.59	y	9	29.6444	25.4107	TargetScan	light
F18A1.5	YHQVLTSPEVKPR	2	774.425	1	909.511	y	8	29.6444	25.4107	TargetScan	light
F18A1.5	YHQVLTSPEVKPR	2	774.425	1	433.189	b	3	29.6444	25.4107	TargetScan	light
F18A1.5	YHQVLTSPEVKPR	2	774.425	1	1252.72	y	11	29.6444	25.4107	TargetScan	light
F18A1.5	YHQVLTSPEVKPR	2	784.396	1	1141.62	y	10	29.9835	25.4107	TargetScan	heavy
F18A1.5	YHQVLTSPEVKPR	2	784.396	1	1042.56	y	9	29.9835	25.4107	TargetScan	heavy
F18A1.5	YHQVLTSPEVKPR	2	784.396	1	921.475	y	8	29.9835	25.4107	TargetScan	heavy
F18A1.5	YHQVLTSPEVKPR	2	784.396	1	434.17	b	3	29.9835	25.4107	TargetScan	heavy
F18A1.5	YHQVLTSPEVKPR	2	784.396	1	1270.67	y	11	29.9835	25.4107	TargetScan	heavy
ZK418.9a	IQFKPDTNPNSEDR	2	824.899	1	1148.49	y	10	31.3606	26.3187	TargetScan	light
ZK418.9a	IQFKPDTNPNSEDR	2	824.899	1	936.407	y	8	31.3606	26.3187	TargetScan	light
ZK418.9a	IQFKPDTNPNSEDR	2	824.899	1	714.317	y	6	31.3606	26.3187	TargetScan	light
ZK418.9a	IQFKPDTNPNSEDR	2	824.899	1	729.394	b	6	31.3606	26.3187	TargetScan	light
ZK418.9a	IQFKPDTNPNSEDR	2	824.899	2	714.329	y	12	31.3606	26.3187	TargetScan	light
ZK418.9a	IQFKPDTNPNSEDR	2	835.369	1	1159.44	y	10	31.7165	26.3187	TargetScan	heavy
ZK418.9a	IQFKPDTNPNSEDR	2	835.369	1	940.368	y	8	31.7165	26.3187	TargetScan	heavy
ZK418.9a	IQFKPDTNPNSEDR	2	835.369	1	724.287	y	6	31.7165	26.3187	TargetScan	heavy
ZK418.9a	IQFKPDTNPNSEDR	2	835.369	1	741.369	b	6	31.7165	26.3187	TargetScan	heavy
ZK418.9a	IQFKPDTNPNSEDR	2	835.369	2	717.302	y	12	31.7165	26.3187	TargetScan	heavy
C56G2.1a	FVDYGGYSK	2	515.242	1	791.342	y	7	20.8322	28.4678	TargetScan	light
C56G2.1a	FVDYGGYSK	2	515.242	1	675.315	y	6	20.8322	28.4678	TargetScan	light
C56G2.1a	FVDYGGYSK	2	515.242	1	890.41	y	8	20.8322	28.4678	TargetScan	light
C56G2.1a	FVDYGGYSK	2	515.242	1	449.23	y	4	20.8322	28.4678	TargetScan	light
C56G2.1a	FVDYGGYSK	2	515.242	1	400.209	y	3	20.8322	28.4678	TargetScan	light
C56G2.1a	FVDYGGYSK	2	520.228	1	798.318	y	7	21.0017	28.4678	TargetScan	heavy
C56G2.1a	FVDYGGYSK	2	520.228	1	683.294	y	6	21.0017	28.4678	TargetScan	heavy
C56G2.1a	FVDYGGYSK	2	520.228	1	898.383	y	8	21.0017	28.4678	TargetScan	heavy
C56G2.1a	FVDYGGYSK	2	520.228	1	460.215	y	4	21.0017	28.4678	TargetScan	heavy
C56G2.1a	FVDYGGYSK	2	520.228	1	396.196	y	3	21.0017	28.4678	TargetScan	heavy
ZK418.9a	IQFKPDTNPNSEDR	3	554.269	1	717.317	y	6	27.7018	26.3187	TargetScan	light
ZK418.9a	IQFKPDTNPNSEDR	3	554.269	1	620.264	y	5	27.7018	26.3187	TargetScan	light
ZK418.9a	IQFKPDTNPNSEDR	3	554.269	1	1144.49	y	10	27.7018	26.3187	TargetScan	light
ZK418.9a	IQFKPDTNPNSEDR	3	554.269	1	506.221	y	4	27.7018	26.3187	TargetScan	light
ZK418.9a	IQFKPDTNPNSEDR	3	554.269	1	944.484	b	8	27.7018	26.3187	TargetScan	light
ZK418.9a	IQFKPDTNPNSEDR	3	561.248	1	727.287	y	6	28.0089	26.3187	TargetScan	heavy
ZK418.9a	IQFKPDTNPNSEDR	3	561.248	1	629.237	y	5	28.0089	26.3187	TargetScan	heavy
ZK418.9a	IQFKPDTNPNSEDR	3	561.248	1	1159.44	y	10	28.0089	26.3187	TargetScan	heavy
ZK418.9a	IQFKPDTNPNSEDR	3	561.248	1	513.2	y	4	28.0089	26.3187	TargetScan	heavy
ZK418.9a	IQFKPDTNPNSEDR	3	561.248	1	955.451	b	8	28.0089	26.3187	TargetScan	heavy
C56G2.1a	FVDYGGYSK	2	518.242	1	789.342	y	7	20.9342	28.4678	TargetScan	light
C56G2.1a	FVDYGGYSK	2	518.242	1	674.315	y	6	20.9342	28.4678	TargetScan	light
C56G2.1a	FVDYGGYSK	2	518.242	1	888.41	y	8	20.9342	28.4678	TargetScan	light
C56G2.1a	FVDYGGYSK	2	518.242	1	454.23	y	4	20.9342	28.4678	TargetScan	light
C56G2.1a	FVDYGGYSK	2	518.242	1	397.209	y	3	20.9342	28.4678	TargetScan	light
C56G2.1a	FVDYGGYSK	2	523.228	1	797.318	y	7	21.1037	28.4678	TargetScan	heavy
C56G2.1a	FVDYGGYSK	2	523.228	1	681.294	y	6	21.1037	28.4678	TargetScan	heavy
C56G2.1a	FVDYGGYSK	2	523.228	1	897.383	y	8	21.1037	28.4678	TargetScan	heavy
C56G2.1a	FVDYGGYSK	2	523.228	1	459.215	y	4	21.1037	28.4678	TargetScan	heavy
C56G2.1a	FVDYGGYSK	2	523.228	1	401.196	y	3	21.1037	28.4678	TargetScan	heavy
Y48B6A.14	YEVDIANYK	2	557.774	1	822.436	y	7	22.2783	34.8372	TargetScan	light
Y48B6A.14	YEVDIANYK	2	557.774	1	608.341	y	5	22.2783	34.8372	TargetScan	light
Y48B6A.14	YEVDIANYK	2	557.774	1	723.368	y	6	22.2783	34.8372	TargetScan	light
Y48B6A.14	YEVDIANYK	2	557.774	1	620.293	b	5	22.2783	34.8372	TargetScan	light
Y48B6A.14	YEVDIANYK	2	557.774	1	495.257	y	4	22.2783	34.8372	TargetScan	light
Y48B6A.14	YEVDIANYK	2	563.258	1	831.409	y	7	22.4648	34.8372	TargetScan	heavy
Y48B6A.14	YEVDIANYK	2	563.258	1	615.319	y	5	22.4648	34.8372	TargetScan	heavy
Y48B6A.14	YEVDIANYK	2	563.258	1	731.343	y	6	22.4648	34.8372	TargetScan	heavy
Y48B6A.14	YEVDIANYK	2	563.258	1	625.278	b	5	22.4648	34.8372	TargetScan	heavy
Y48B6A.14	YEVDIANYK	2	563.258	1	501.238	y	4	22.4648	34.8372	TargetScan	heavy
F18A1.5	EFNGGFSLGTGSATR	2	750.857	1	649.327	y	7	28.8431	38.2041	TargetScan	light
F18A1.5	EFNGGFSLGTGSATR	2	750.857	1	849.443	y	9	28.8431	38.2041	TargetScan	light
F18A1.5	EFNGGFSLGTGSATR	2	750.857	1	762.411	y	8	28.8431	38.2041	TargetScan	light
F18A1.5	EFNGGFSLGTGSATR	2	750.857	1	1225.55	b	13	28.8431	38.2041	TargetScan	light
F18A1.5	EFNGGFSLGTGSATR	2	750.857	1	491.258	y	5	28.8431	38.2041	TargetScan	light
F18A1.5	EFNGGFSLGTGSATR	2	760.329	1	659.297	y	7	29.1652	38.2041	TargetScan	heavy
F18A1.5	EFNGGFSLGTGSATR	2	760.329	1	861.407	y	9	29.1652	38.2041	TargetScan	heavy
F18A1.5	EFNGGFSLGTGSATR	2	760.329	1	773.378	y	8	29.1652	38.2041	TargetScan	heavy
F18A1.5	EFNGGFSLGTGSATR	2	760.329	1	1239.51	b	13	29.1652	38.2041	TargetScan	heavy
F18A1.5	EFNGGFSLGTGSATR	2	760.329	1	499.234	y	5	29.1652	38.2041	TargetScan	heavy
F28A12.4	SYLGVADTVGSDFK	2	729.859	1	939.442	y	9	28.1292	44.411	Random	light
F28A12.4	SYLGVADTVGSDFK	2	729.859	1	1095.53	y	11	28.1292	44.411	Random	light
F28A12.4	SYLGVADTVGSDFK	2	729.859	1	868.405	y	8	28.1292	44.411	Random	light
F28A12.4	SYLGVADTVGSDFK	2	729.859	1	553.262	y	5	28.1292	44.411	Random	light
F28A12.4	SYLGVADTVGSDFK	2	729.859	1	753.378	y	7	28.1292	44.411	Random	light
F28A12.4	SYLGVADTVGSDFK	2	737.337	1	949.412	y	9	28.3835	44.411	Random	heavy
F28A12.4	SYLGVADTVGSDFK	2	737.337	1	1107.5	y	11	28.3835	44.411	Random	heavy
F28A12.4	SYLGVADTVGSDFK	2	737.337	1	877.378	y	8	28.3835	44.411	Random	heavy
F28A12.4	SYLGVADTVGSDFK	2	737.337	1	559.244	y	5	28.3835	44.411	Random	heavy
F28A12.4	SYLGVADTVGSDFK	2	737.337	1	761.354	y	7	28.3835	44.411	Random	heavy
F54C9.6	TPFETVTLTTLGSDVK	2	854.953	1	1034.57	y	10	32.3824	50.8526	Random	light
F54C9.6	TPFETVTLTTLGSDVK	2	854.953	1	820.442	y	8	32.3824	50.8526	Random	light
F54C9.6	TPFETVTLTTLGSDVK	2	854.953	1	475.219	b	4	32.3824	50.8526	Random	light
F54C9.6	TPFETVTLTTLGSDVK	2	854.953	1	1234.69	y	12	32.3824	50.8526	Random	light
F54C9.6	TPFETVTLTTLGSDVK	2	854.953	1	505.262	y	5	32.3824	50.8526	Random	light
F54C9.6	TPFETVTLTTLGSDVK	2	863.429	1	1045.54	y	10	32.6706	50.8526	Random	heavy
F54C9.6	TPFETVTLTTLGSDVK	2	863.429	1	829.414	y	8	32.6706	50.8526	Random	heavy
F54C9.6	TPFETVTLTTLGSDVK	2	863.429	1	479.207	b	4	32.6706	50.8526	Random	heavy
F54C9.6	TPFETVTLTTLGSDVK	2	863.429	1	1247.65	y	12	32.6706	50.8526	Random	heavy
F54C9.6	TPFETVTLTTLGSDVK	2	863.429	1	511.244	y	5	32.6706	50.8526	Random	heavy
Y66H1A.4	IPYFNAPIYFK	3	458.248	1	667.382	y	5	23.4769	54.482	Random	light
Y66H1A.4	IPYFNAPIYFK	3	458.248	1	521.276	b	4	23.4769	54.482	Random	light
Y66H1A.4	IPYFNAPIYFK	3	458.248	1	635.319	b	5	23.4769	54.482	Random	light
Y66H1A.4	IPYFNAPIYFK	3	458.248	1	570.329	y	4	23.4769	54.482	Random	light
Y66H1A.4	IPYFNAPIYFK	3	458.248	1	706.356	b	6	23.4769	54.482	Random	light
Y66H1A.4	IPYFNAPIYFK	3	462.569	1	673.364	y	5	23.667	54.482	Random	heavy
Y66H1A.4	IPYFNAPIYFK	3	462.569	1	525.264	b	4	23.667	54.482	Random	heavy
Y66H1A.4	IPYFNAPIYFK	3	462.569	1	641.301	b	5	23.667	54.482	Random	heavy
Y66H1A.4	IPYFNAPIYFK	3	462.569	1	575.314	y	4	23.667	54.482	Random	heavy
Y66H1A.4	IPYFNAPIYFK	3	462.569	1	713.335	b	6	23.667	54.482	Random	heavy
D1007.6	LIYEYLFNEGVTVAK	3	586.982	1	574.356	y	6	29.1412	57.9772	Random	light
D1007.6	LIYEYLFNEGVTVAK	3	586.982	1	817.442	y	8	29.1412	57.9772	Random	light
D1007.6	LIYEYLFNEGVTVAK	3	586.982	1	682.345	b	5	29.1412	57.9772	Random	light
D1007.6	LIYEYLFNEGVTVAK	3	586.982	1	418.267	y	4	29.1412	57.9772	Random	light
D1007.6	LIYEYLFNEGVTVAK	3	586.982	1	519.282	b	4	29.1412	57.9772	Random	light
D1007.6	LIYEYLFNEGVTVAK	3	592.632	1	581.335	y	6	29.3898	57.9772	Random	heavy
D1007.6	LIYEYLFNEGVTVAK	3	592.632	1	827.412	y	8	29.3898	57.9772	Random	heavy
D1007.6	LIYEYLFNEGVTVAK	3	592.632	1	687.33	b	5	29.3898	57.9772	Random	heavy
D1007.6	LIYEYLFNEGVTVAK	3	592.632	1	423.251	y	4	29.3898	57.9772	Random	heavy
D1007.6	LIYEYLFNEGVTVAK	3	592.632	1	523.269	b	4	29.3898	57.9772	Random	heavy
M28.8	GISDGLQNTPNSK	2	665.833	1	445.241	y	4	25.9523	25.7843	TargetScan	light
M28.8	GISDGLQNTPNSK	2	665.833	2	580.781	y	11	25.9523	25.7843	TargetScan	light
M28.8	GISDGLQNTPNSK	2	665.833	1	788.39	y	7	25.9523	25.7843	TargetScan	light
M28.8	GISDGLQNTPNSK	2	665.833	1	546.289	y	5	25.9523	25.7843	TargetScan	light
M28.8	GISDGLQNTPNSK	2	665.833	1	1073.52	y	10	25.9523	25.7843	TargetScan	light
M28.8	GISDGLQNTPNSK	2	674.308	1	451.223	y	4	26.2405	25.7843	TargetScan	heavy
M28.8	GISDGLQNTPNSK	2	674.308	2	588.258	y	11	26.2405	25.7843	TargetScan	heavy
M28.8	GISDGLQNTPNSK	2	674.308	1	799.357	y	7	26.2405	25.7843	TargetScan	heavy
M28.8	GISDGLQNTPNSK	2	674.308	1	553.267	y	5	26.2405	25.7843	TargetScan	heavy
M28.8	GISDGLQNTPNSK	2	674.308	1	1087.48	y	10	26.2405	25.7843	TargetScan	heavy
F37A4.8	SNAIEAYNAPDSK	2	690.325	1	994.448	y	9	26.785	26.4585	TargetScan	light
F37A4.8	SNAIEAYNAPDSK	2	690.325	1	865.406	y	8	26.785	26.4585	TargetScan	light
F37A4.8	SNAIEAYNAPDSK	2	690.325	1	794.368	y	7	26.785	26.4585	TargetScan	light
F37A4.8	SNAIEAYNAPDSK	2	690.325	1	446.225	y	4	26.785	26.4585	TargetScan	light
F37A4.8	SNAIEAYNAPDSK	2	690.325	1	1107.53	y	10	26.785	26.4585	TargetScan	light
F37A4.8	SNAIEAYNAPDSK	2	698.302	1	1005.41	y	9	27.0563	26.4585	TargetScan	heavy
F37A4.8	SNAIEAYNAPDSK	2	698.302	1	875.375	y	8	27.0563	26.4585	TargetScan	heavy
F37A4.8	SNAIEAYNAPDSK	2	698.302	1	803.341	y	7	27.0563	26.4585	TargetScan	heavy
F37A4.8	SNAIEAYNAPDSK	2	698.302	1	451.21	y	4	27.0563	26.4585	TargetScan	heavy
F37A4.8	SNAIEAYNAPDSK	2	698.302	1	1119.5	y	10	27.0563	26.4585	TargetScan	heavy
F40F8.5	YSEYLTQVSK	2	609.306	1	562.32	y	5	24.0304	30.1659	TargetScan	light
F40F8.5	YSEYLTQVSK	2	609.306	1	1054.54	y	9	24.0304	30.1659	TargetScan	light
F40F8.5	YSEYLTQVSK	2	609.306	1	967.51	y	8	24.0304	30.1659	TargetScan	light
F40F8.5	YSEYLTQVSK	2	609.306	1	675.404	y	6	24.0304	30.1659	TargetScan	light
F40F8.5	YSEYLTQVSK	2	609.306	1	838.467	y	7	24.0304	30.1659	TargetScan	light
F40F8.5	YSEYLTQVSK	2	615.288	1	569.299	y	5	24.2338	30.1659	TargetScan	heavy
F40F8.5	YSEYLTQVSK	2	615.288	1	1065.51	y	9	24.2338	30.1659	TargetScan	heavy
F40F8.5	YSEYLTQVSK	2	615.288	1	977.48	y	8	24.2338	30.1659	TargetScan	heavy
F40F8.5	YSEYLTQVSK	2	615.288	1	683.38	y	6	24.2338	30.1659	TargetScan	heavy
F40F8.5	YSEYLTQVSK	2	615.288	1	847.44	y	7	24.2338	30.1659	TargetScan	heavy
C56G2.1a	ITVPAALDTESR	2	636.843	1	959.48	y	9	24.9667	35.8162	TargetScan	light
C56G2.1a	ITVPAALDTESR	2	636.843	2	480.244	y	9	24.9667	35.8162	TargetScan	light
C56G2.1a	ITVPAALDTESR	2	636.843	1	791.39	y	7	24.9667	35.8162	TargetScan	light
C56G2.1a	ITVPAALDTESR	2	636.843	1	492.242	y	4	24.9667	35.8162	TargetScan	light
C56G2.1a	ITVPAALDTESR	2	636.843	1	720.353	y	6	24.9667	35.8162	TargetScan	light
C56G2.1a	ITVPAALDTESR	2	644.321	1	971.444	y	9	25.2209	35.8162	TargetScan	heavy
C56G2.1a	ITVPAALDTESR	2	644.321	2	486.225	y	9	25.2209	35.8162	TargetScan	heavy
C56G2.1a	ITVPAALDTESR	2	644.321	1	801.36	y	7	25.2209	35.8162	TargetScan	heavy
C56G2.1a	ITVPAALDTESR	2	644.321	1	499.22	y	4	25.2209	35.8162	TargetScan	heavy
C56G2.1a	ITVPAALDTESR	2	644.321	1	729.326	y	6	25.2209	35.8162	TargetScan	heavy
F28A12.4	YASGDAYGTLGIDTVK	2	815.901	1	903.515	y	9	31.0546	39.3962	Random	light
F28A12.4	YASGDAYGTLGIDTVK	2	815.901	1	1066.58	y	10	31.0546	39.3962	Random	light
F28A12.4	YASGDAYGTLGIDTVK	2	815.901	1	632.362	y	6	31.0546	39.3962	Random	light
F28A12.4	YASGDAYGTLGIDTVK	2	815.901	1	1396.7	y	14	31.0546	39.3962	Random	light
F28A12.4	YASGDAYGTLGIDTVK	2	815.901	1	462.256	y	4	31.0546	39.3962	Random	light
F28A12.4	YASGDAYGTLGIDTVK	2	824.376	1	913.485	y	9	31.3428	39.3962	Random	heavy
F28A12.4	YASGDAYGTLGIDTVK	2	824.376	1	1077.55	y	10	31.3428	39.3962	Random	heavy
F28A12.4	YASGDAYGTLGIDTVK	2	824.376	1	639.341	y	6	31.3428	39.3962	Random	heavy
F28A12.4	YASGDAYGTLGIDTVK	2	824.376	1	1411.65	y	14	31.3428	39.3962	Random	heavy
F28A12.4	YASGDAYGTLGIDTVK	2	824.376	1	467.241	y	4	31.3428	39.3962	Random	heavy
B0348.6a	LSIPDTEILR	2	578.832	1	843.458	y	7	22.9943	44.4859	TargetScan	light
B0348.6a	LSIPDTEILR	2	578.832	1	631.378	y	5	22.9943	44.4859	TargetScan	light
B0348.6a	LSIPDTEILR	2	578.832	2	422.232	y	7	22.9943	44.4859	TargetScan	light
B0348.6a	LSIPDTEILR	2	578.832	1	746.405	y	6	22.9943	44.4859	TargetScan	light
B0348.6a	LSIPDTEILR	2	578.832	2	478.774	y	8	22.9943	44.4859	TargetScan	light
B0348.6a	LSIPDTEILR	2	585.313	1	853.427	y	7	23.2146	44.4859	TargetScan	heavy
B0348.6a	LSIPDTEILR	2	585.313	1	639.354	y	5	23.2146	44.4859	TargetScan	heavy
B0348.6a	LSIPDTEILR	2	585.313	2	427.217	y	7	23.2146	44.4859	TargetScan	heavy
B0348.6a	LSIPDTEILR	2	585.313	1	755.378	y	6	23.2146	44.4859	TargetScan	heavy
B0348.6a	LSIPDTEILR	2	585.313	2	484.258	y	8	23.2146	44.4859	TargetScan	heavy
F32D1.5	GDVNGTVQDILGGIR	2	757.402	1	871.5	y	8	29.0657	52.8313	Random	light
F32D1.5	GDVNGTVQDILGGIR	2	757.402	1	743.442	y	7	29.0657	52.8313	Random	light
F32D1.5	GDVNGTVQDILGGIR	2	757.402	1	402.246	y	4	29.0657	52.8313	Random	light
F32D1.5	GDVNGTVQDILGGIR	2	757.402	1	515.331	y	5	29.0657	52.8313	Random	light
F32D1.5	GDVNGTVQDILGGIR	2	757.402	1	970.569	y	9	29.0657	52.8313	Random	light
F32D1.5	GDVNGTVQDILGGIR	2	767.372	1	883.464	y	8	29.4047	52.8313	Random	heavy
F32D1.5	GDVNGTVQDILGGIR	2	767.372	1	753.411	y	7	29.4047	52.8313	Random	heavy
F32D1.5	GDVNGTVQDILGGIR	2	767.372	1	409.225	y	4	29.4047	52.8313	Random	heavy
F32D1.5	GDVNGTVQDILGGIR	2	767.372	1	523.306	y	5	29.4047	52.8313	Random	heavy
F32D1.5	GDVNGTVQDILGGIR	2	767.372	1	983.529	y	9	29.4047	52.8313	Random	heavy
F35G12.2	EDASEDLAEAITAIK	2	788.391	1	816.483	y	8	30.1193	54.9141	Random	light
F35G12.2	EDASEDLAEAITAIK	2	788.391	1	616.403	y	6	30.1193	54.9141	Random	light
F35G12.2	EDASEDLAEAITAIK	2	788.391	1	432.282	y	4	30.1193	54.9141	Random	light
F35G12.2	EDASEDLAEAITAIK	2	788.391	1	1044.59	y	10	30.1193	54.9141	Random	light
F35G12.2	EDASEDLAEAITAIK	2	788.391	2	516.212	b	10	30.1193	54.9141	Random	light
F35G12.2	EDASEDLAEAITAIK	2	796.367	1	825.456	y	8	30.3905	54.9141	Random	heavy
F35G12.2	EDASEDLAEAITAIK	2	796.367	1	623.382	y	6	30.3905	54.9141	Random	heavy
F35G12.2	EDASEDLAEAITAIK	2	796.367	1	437.267	y	4	30.3905	54.9141	Random	heavy
F35G12.2	EDASEDLAEAITAIK	2	796.367	1	1055.56	y	10	30.3905	54.9141	Random	heavy
F35G12.2	EDASEDLAEAITAIK	2	796.367	2	521.197	b	10	30.3905	54.9141	Random	heavy
C26E6.2	LFLVNTDAPALWR	2	758.419	1	1043.53	y	9	29.1002	58.368	TargetScan	light
C26E6.2	LFLVNTDAPALWR	2	758.419	1	828.437	y	7	29.1002	58.368	TargetScan	light
C26E6.2	LFLVNTDAPALWR	2	758.419	1	713.41	y	6	29.1002	58.368	TargetScan	light
C26E6.2	LFLVNTDAPALWR	2	758.419	1	929.484	y	8	29.1002	58.368	TargetScan	light
C26E6.2	LFLVNTDAPALWR	2	758.419	1	642.373	y	5	29.1002	58.368	TargetScan	light
C26E6.2	LFLVNTDAPALWR	2	767.393	1	1057.49	y	9	29.4054	58.368	TargetScan	heavy
C26E6.2	LFLVNTDAPALWR	2	767.393	1	839.404	y	7	29.4054	58.368	TargetScan	heavy
C26E6.2	LFLVNTDAPALWR	2	767.393	1	723.38	y	6	29.4054	58.368	TargetScan	heavy
C26E6.2	LFLVNTDAPALWR	2	767.393	1	941.448	y	8	29.4054	58.368	TargetScan	heavy
C26E6.2	LFLVNTDAPALWR	2	767.393	1	651.346	y	5	29.4054	58.368	TargetScan	heavy
Y39A1B.3	SAIQFLTTFLDNNR	2	820.425	1	980.48	y	8	31.2084	70.35	TargetScan	light
Y39A1B.3	SAIQFLTTFLDNNR	2	820.425	1	1093.56	y	9	31.2084	70.35	TargetScan	light
Y39A1B.3	SAIQFLTTFLDNNR	2	820.425	1	403.205	y	3	31.2084	70.35	TargetScan	light
Y39A1B.3	SAIQFLTTFLDNNR	2	820.425	1	778.385	y	6	31.2084	70.35	TargetScan	light
Y39A1B.3	SAIQFLTTFLDNNR	2	820.425	1	879.432	y	7	31.2084	70.35	TargetScan	light
Y39A1B.3	SAIQFLTTFLDNNR	2	830.396	1	993.441	y	8	31.5475	70.35	TargetScan	heavy
Y39A1B.3	SAIQFLTTFLDNNR	2	830.396	1	1107.52	y	9	31.5475	70.35	TargetScan	heavy
Y39A1B.3	SAIQFLTTFLDNNR	2	830.396	1	411.181	y	3	31.5475	70.35	TargetScan	heavy
Y39A1B.3	SAIQFLTTFLDNNR	2	830.396	1	789.352	y	6	31.5475	70.35	TargetScan	heavy
Y39A1B.3	SAIQFLTTFLDNNR	2	830.396	1	891.396	y	7	31.5475	70.35	TargetScan	heavy
M28.8	GISDGLQNTPNSK	2	658.833	1	449.241	y	4	25.7143	25.7843	TargetScan	light
M28.8	GISDGLQNTPNSK	2	658.833	2	575.781	y	11	25.7143	25.7843	TargetScan	light
M28.8	GISDGLQNTPNSK	2	658.833	1	792.39	y	7	25.7143	25.7843	TargetScan	light
M28.8	GISDGLQNTPNSK	2	658.833	1	546.289	y	5	25.7143	25.7843	TargetScan	light
M28.8	GISDGLQNTPNSK	2	658.833	1	1070.52	y	10	25.7143	25.7843	TargetScan	light
M28.8	GISDGLQNTPNSK	2	667.308	1	450.223	y	4	26.0025	25.7843	TargetScan	heavy
M28.8	GISDGLQNTPNSK	2	667.308	2	592.258	y	11	26.0025	25.7843	TargetScan	heavy
M28.8	GISDGLQNTPNSK	2	667.308	1	794.357	y	7	26.0025	25.7843	TargetScan	heavy
M28.8	GISDGLQNTPNSK	2	667.308	1	553.267	y	5	26.0025	25.7843	TargetScan	heavy
M28.8	GISDGLQNTPNSK	2	667.308	1	1089.48	y	10	26.0025	25.7843	TargetScan	heavy
T10E10.2	QLEQEASSLR	2	577.798	1	535.305	y	5	22.9591	26.4749	Random	light
T10E10.2	QLEQEASSLR	2	577.798	1	914.448	y	8	22.9591	26.4749	Random	light
T10E10.2	QLEQEASSLR	2	577.798	1	658.347	y	6	22.9591	26.4749	Random	light
T10E10.2	QLEQEASSLR	2	577.798	1	459.268	y	4	22.9591	26.4749	Random	light
T10E10.2	QLEQEASSLR	2	577.798	1	791.406	y	7	22.9591	26.4749	Random	light
T10E10.2	QLEQEASSLR	2	585.277	1	542.28	y	5	23.2134	26.4749	Random	heavy
T10E10.2	QLEQEASSLR	2	585.277	1	932.412	y	8	23.2134	26.4749	Random	heavy
T10E10.2	QLEQEASSLR	2	585.277	1	668.32	y	6	23.2134	26.4749	Random	heavy
T10E10.2	QLEQEASSLR	2	585.277	1	473.246	y	4	23.2134	26.4749	Random	heavy
T10E10.2	QLEQEASSLR	2	585.277	1	803.373	y	7	23.2134	26.4749	Random	heavy
F59F5.7	QPEFDPVDDK	2	592.272	1	572.288	y	5	23.4512	30.2702	TargetScan	light
F59F5.7	QPEFDPVDDK	2	592.272	1	684.315	y	6	23.4512	30.2702	TargetScan	light
F59F5.7	QPEFDPVDDK	2	592.272	1	839.384	y	7	23.4512	30.2702	TargetScan	light
F59F5.7	QPEFDPVDDK	2	592.272	2	527.243	y	9	23.4512	30.2702	TargetScan	light
F59F5.7	QPEFDPVDDK	2	592.272	1	967.426	y	8	23.4512	30.2702	TargetScan	light
F59F5.7	QPEFDPVDDK	2	598.254	1	575.27	y	5	23.6546	30.2702	TargetScan	heavy
F59F5.7	QPEFDPVDDK	2	598.254	1	696.294	y	6	23.6546	30.2702	TargetScan	heavy
F59F5.7	QPEFDPVDDK	2	598.254	1	838.359	y	7	23.6546	30.2702	TargetScan	heavy
F59F5.7	QPEFDPVDDK	2	598.254	2	535.228	y	9	23.6546	30.2702	TargetScan	heavy
F59F5.7	QPEFDPVDDK	2	598.254	1	969.399	y	8	23.6546	30.2702	TargetScan	heavy
F56H11.4	FVAIATHGPK	2	520.797	1	794.452	y	8	21.0211	25.7891	Random	light
F56H11.4	FVAIATHGPK	2	520.797	1	610.331	y	6	21.0211	25.7891	Random	light
F56H11.4	FVAIATHGPK	2	520.797	1	723.415	y	7	21.0211	25.7891	Random	light
F56H11.4	FVAIATHGPK	2	520.797	1	539.294	y	5	21.0211	25.7891	Random	light
F56H11.4	FVAIATHGPK	2	520.797	1	438.246	y	4	21.0211	25.7891	Random	light
F56H11.4	FVAIATHGPK	2	527.279	1	805.419	y	8	21.2415	25.7891	Random	heavy
F56H11.4	FVAIATHGPK	2	527.279	1	619.304	y	6	21.2415	25.7891	Random	heavy
F56H11.4	FVAIATHGPK	2	527.279	1	733.385	y	7	21.2415	25.7891	Random	heavy
F56H11.4	FVAIATHGPK	2	527.279	1	547.27	y	5	21.2415	25.7891	Random	heavy
F56H11.4	FVAIATHGPK	2	527.279	1	445.225	y	4	21.2415	25.7891	Random	heavy
T10E10.2	QLEQEASSLR	2	580.798	1	533.305	y	5	23.0611	26.4749	Random	light
T10E10.2	QLEQEASSLR	2	580.798	1	919.448	y	8	23.0611	26.4749	Random	light
T10E10.2	QLEQEASSLR	2	580.798	1	662.347	y	6	23.0611	26.4749	Random	light
T10E10.2	QLEQEASSLR	2	580.798	1	462.268	y	4	23.0611	26.4749	Random	light
T10E10.2	QLEQEASSLR	2	580.798	1	790.406	y	7	23.0611	26.4749	Random	light
T10E10.2	QLEQEASSLR	2	588.277	1	541.28	y	5	23.3154	26.4749	Random	heavy
T10E10.2	QLEQEASSLR	2	588.277	1	931.412	y	8	23.3154	26.4749	Random	heavy
T10E10.2	QLEQEASSLR	2	588.277	1	671.32	y	6	23.3154	26.4749	Random	heavy
T10E10.2	QLEQEASSLR	2	588.277	1	469.246	y	4	23.3154	26.4749	Random	heavy
T10E10.2	QLEQEASSLR	2	588.277	1	801.373	y	7	23.3154	26.4749	Random	heavy
F59F5.7	QPEFDPVDDK	2	595.272	1	573.288	y	5	23.5532	30.2702	TargetScan	light
F59F5.7	QPEFDPVDDK	2	595.272	1	688.315	y	6	23.5532	30.2702	TargetScan	light
F59F5.7	QPEFDPVDDK	2	595.272	1	835.384	y	7	23.5532	30.2702	TargetScan	light
F59F5.7	QPEFDPVDDK	2	595.272	2	531.243	y	9	23.5532	30.2702	TargetScan	light
F59F5.7	QPEFDPVDDK	2	595.272	1	964.426	y	8	23.5532	30.2702	TargetScan	light
F59F5.7	QPEFDPVDDK	2	601.254	1	579.27	y	5	23.7566	30.2702	TargetScan	heavy
F59F5.7	QPEFDPVDDK	2	601.254	1	695.294	y	6	23.7566	30.2702	TargetScan	heavy
F59F5.7	QPEFDPVDDK	2	601.254	1	843.359	y	7	23.7566	30.2702	TargetScan	heavy
F59F5.7	QPEFDPVDDK	2	601.254	2	536.228	y	9	23.7566	30.2702	TargetScan	heavy
F59F5.7	QPEFDPVDDK	2	601.254	1	973.399	y	8	23.7566	30.2702	TargetScan	heavy
F28A12.4	GAPGTSASGAFTYGGLDK	2	828.896	2	764.868	y	16	31.4965	35.9616	Random	light
F28A12.4	GAPGTSASGAFTYGGLDK	2	828.896	2	755.844	b	17	31.4965	35.9616	Random	light
F28A12.4	GAPGTSASGAFTYGGLDK	2	828.896	1	489.267	y	5	31.4965	35.9616	Random	light
F28A12.4	GAPGTSASGAFTYGGLDK	2	828.896	1	1028.51	y	10	31.4965	35.9616	Random	light
F28A12.4	GAPGTSASGAFTYGGLDK	2	828.896	1	1273.61	y	13	31.4965	35.9616	Random	light
F28A12.4	GAPGTSASGAFTYGGLDK	2	838.369	2	773.342	y	16	31.8185	35.9616	Random	heavy
F28A12.4	GAPGTSASGAFTYGGLDK	2	838.369	2	764.319	b	17	31.8185	35.9616	Random	heavy
F28A12.4	GAPGTSASGAFTYGGLDK	2	838.369	1	495.249	y	5	31.8185	35.9616	Random	heavy
F28A12.4	GAPGTSASGAFTYGGLDK	2	838.369	1	1039.47	y	10	31.8185	35.9616	Random	heavy
F28A12.4	GAPGTSASGAFTYGGLDK	2	838.369	1	1287.56	y	13	31.8185	35.9616	Random	heavy
M04B2.3	QAFLNDIEQVK	2	652.845	1	845.437	y	7	25.5107	41.7051	TargetScan	light
M04B2.3	QAFLNDIEQVK	2	652.845	1	958.521	y	8	25.5107	41.7051	TargetScan	light
M04B2.3	QAFLNDIEQVK	2	652.845	1	731.394	y	6	25.5107	41.7051	TargetScan	light
M04B2.3	QAFLNDIEQVK	2	652.845	1	616.367	y	5	25.5107	41.7051	TargetScan	light
M04B2.3	QAFLNDIEQVK	2	652.845	1	1105.59	y	9	25.5107	41.7051	TargetScan	light
M04B2.3	QAFLNDIEQVK	2	660.324	1	855.407	y	7	25.765	41.7051	TargetScan	heavy
M04B2.3	QAFLNDIEQVK	2	660.324	1	969.488	y	8	25.765	41.7051	TargetScan	heavy
M04B2.3	QAFLNDIEQVK	2	660.324	1	739.37	y	6	25.765	41.7051	TargetScan	heavy
M04B2.3	QAFLNDIEQVK	2	660.324	1	623.346	y	5	25.765	41.7051	TargetScan	heavy
M04B2.3	QAFLNDIEQVK	2	660.324	1	1117.55	y	9	25.765	41.7051	TargetScan	heavy
C25A1.3	ITYENVEELAEGK	2	747.869	1	775.384	y	7	28.7415	45.7162	TargetScan	light
C25A1.3	ITYENVEELAEGK	2	747.869	1	1280.6	y	11	28.7415	45.7162	TargetScan	light
C25A1.3	ITYENVEELAEGK	2	747.869	1	988.495	y	9	28.7415	45.7162	TargetScan	light
C25A1.3	ITYENVEELAEGK	2	747.869	1	517.299	y	5	28.7415	45.7162	TargetScan	light
C25A1.3	ITYENVEELAEGK	2	747.869	1	1117.54	y	10	28.7415	45.7162	TargetScan	light
C25A1.3	ITYENVEELAEGK	2	755.347	1	783.359	y	7	28.9958	45.7162	TargetScan	heavy
C25A1.3	ITYENVEELAEGK	2	755.347	1	1293.56	y	11	28.9958	45.7162	TargetScan	heavy
C25A1.3	ITYENVEELAEGK	2	755.347	1	999.462	y	9	28.9958	45.7162	TargetScan	heavy
C25A1.3	ITYENVEELAEGK	2	755.347	1	523.28	y	5	28.9958	45.7162	TargetScan	heavy
C25A1.3	ITYENVEELAEGK	2	755.347	1	1129.5	y	10	28.9958	45.7162	TargetScan	heavy
F32D1.5	GDVNGTVQDILGGIR	3	505.27	1	402.246	y	4	25.5459	52.8313	Random	light
F32D1.5	GDVNGTVQDILGGIR	3	505.27	1	515.331	y	5	25.5459	52.8313	Random	light
F32D1.5	GDVNGTVQDILGGIR	3	505.27	1	743.442	y	7	25.5459	52.8313	Random	light
F32D1.5	GDVNGTVQDILGGIR	3	505.27	1	628.415	y	6	25.5459	52.8313	Random	light
F32D1.5	GDVNGTVQDILGGIR	3	505.27	1	886.391	b	9	25.5459	52.8313	Random	light
F32D1.5	GDVNGTVQDILGGIR	3	511.917	1	409.225	y	4	25.8384	52.8313	Random	heavy
F32D1.5	GDVNGTVQDILGGIR	3	511.917	1	523.306	y	5	25.8384	52.8313	Random	heavy
F32D1.5	GDVNGTVQDILGGIR	3	511.917	1	753.411	y	7	25.8384	52.8313	Random	heavy
F32D1.5	GDVNGTVQDILGGIR	3	511.917	1	637.387	y	6	25.8384	52.8313	Random	heavy
F32D1.5	GDVNGTVQDILGGIR	3	511.917	1	897.357	b	9	25.8384	52.8313	Random	heavy
F35G12.2	EDASEDLAEAITAIK	3	525.929	1	745.446	y	7	26.4549	54.9141	Random	light
F35G12.2	EDASEDLAEAITAIK	3	525.929	1	616.403	y	6	26.4549	54.9141	Random	light
F35G12.2	EDASEDLAEAITAIK	3	525.929	1	432.282	y	4	26.4549	54.9141	Random	light
F35G12.2	EDASEDLAEAITAIK	3	525.929	1	545.366	y	5	26.4549	54.9141	Random	light
F35G12.2	EDASEDLAEAITAIK	3	525.929	1	816.483	y	8	26.4549	54.9141	Random	light
F35G12.2	EDASEDLAEAITAIK	3	531.247	1	753.422	y	7	26.6889	54.9141	Random	heavy
F35G12.2	EDASEDLAEAITAIK	3	531.247	1	623.382	y	6	26.6889	54.9141	Random	heavy
F35G12.2	EDASEDLAEAITAIK	3	531.247	1	437.267	y	4	26.6889	54.9141	Random	heavy
F35G12.2	EDASEDLAEAITAIK	3	531.247	1	551.348	y	5	26.6889	54.9141	Random	heavy
F35G12.2	EDASEDLAEAITAIK	3	531.247	1	825.456	y	8	26.6889	54.9141	Random	heavy
Y69E1A.2	GFDYGWISFPEAAK	2	794.377	1	749.383	y	7	30.3228	58.7405	Random	light
Y69E1A.2	GFDYGWISFPEAAK	2	794.377	1	515.283	y	5	30.3228	58.7405	Random	light
Y69E1A.2	GFDYGWISFPEAAK	2	794.377	1	862.467	y	8	30.3228	58.7405	Random	light
Y69E1A.2	GFDYGWISFPEAAK	2	794.377	1	1105.57	y	10	30.3228	58.7405	Random	light
Y69E1A.2	GFDYGWISFPEAAK	2	794.377	1	662.351	y	6	30.3228	58.7405	Random	light
Y69E1A.2	GFDYGWISFPEAAK	2	802.354	1	757.359	y	7	30.594	58.7405	Random	heavy
Y69E1A.2	GFDYGWISFPEAAK	2	802.354	1	521.265	y	5	30.594	58.7405	Random	heavy
Y69E1A.2	GFDYGWISFPEAAK	2	802.354	1	871.44	y	8	30.594	58.7405	Random	heavy
Y69E1A.2	GFDYGWISFPEAAK	2	802.354	1	1117.53	y	10	30.594	58.7405	Random	heavy
Y69E1A.2	GFDYGWISFPEAAK	2	802.354	1	669.33	y	6	30.594	58.7405	Random	heavy
Y39A1B.3	SITDILTGLFSPGSGNR	2	867.954	1	991.496	y	10	32.8244	70.7367	TargetScan	light
Y39A1B.3	SITDILTGLFSPGSGNR	2	867.954	1	587.29	y	6	32.8244	70.7367	TargetScan	light
Y39A1B.3	SITDILTGLFSPGSGNR	2	867.954	1	1092.54	y	11	32.8244	70.7367	TargetScan	light
Y39A1B.3	SITDILTGLFSPGSGNR	2	867.954	1	821.391	y	8	32.8244	70.7367	TargetScan	light
Y39A1B.3	SITDILTGLFSPGSGNR	2	867.954	1	1205.63	y	12	32.8244	70.7367	TargetScan	light
Y39A1B.3	SITDILTGLFSPGSGNR	2	878.424	1	1005.45	y	10	33.1804	70.7367	TargetScan	heavy
Y39A1B.3	SITDILTGLFSPGSGNR	2	878.424	1	597.26	y	6	33.1804	70.7367	TargetScan	heavy
Y39A1B.3	SITDILTGLFSPGSGNR	2	878.424	1	1107.5	y	11	33.1804	70.7367	TargetScan	heavy
Y39A1B.3	SITDILTGLFSPGSGNR	2	878.424	1	833.354	y	8	33.1804	70.7367	TargetScan	heavy
Y39A1B.3	SITDILTGLFSPGSGNR	2	878.424	1	1221.58	y	12	33.1804	70.7367	TargetScan	heavy
F40F8.5	SIDDDPSDTTIDHTR	3	563.251	1	413.226	y	3	28.097	25.9097	TargetScan	light
F40F8.5	SIDDDPSDTTIDHTR	3	563.251	2	744.316	y	13	28.097	25.9097	TargetScan	light
F40F8.5	SIDDDPSDTTIDHTR	3	563.251	1	528.253	y	4	28.097	25.9097	TargetScan	light
F40F8.5	SIDDDPSDTTIDHTR	3	563.251	1	742.385	y	6	28.097	25.9097	TargetScan	light
F40F8.5	SIDDDPSDTTIDHTR	3	563.251	1	843.432	y	7	28.097	25.9097	TargetScan	light
F40F8.5	SIDDDPSDTTIDHTR	3	569.899	1	421.202	y	3	28.3895	25.9097	TargetScan	heavy
F40F8.5	SIDDDPSDTTIDHTR	3	569.899	2	753.289	y	13	28.3895	25.9097	TargetScan	heavy
F40F8.5	SIDDDPSDTTIDHTR	3	569.899	1	537.226	y	4	28.3895	25.9097	TargetScan	heavy
F40F8.5	SIDDDPSDTTIDHTR	3	569.899	1	753.352	y	6	28.3895	25.9097	TargetScan	heavy
F40F8.5	SIDDDPSDTTIDHTR	3	569.899	1	855.396	y	7	28.3895	25.9097	TargetScan	heavy
F39H2.3	VFGNPSSSEVSENR	2	754.852	1	1091.5	b	11	28.979	26.4856	Random	light
F39H2.3	VFGNPSSSEVSENR	2	754.852	1	1262.56	y	12	28.979	26.4856	Random	light
F39H2.3	VFGNPSSSEVSENR	2	754.852	1	505.237	y	4	28.979	26.4856	Random	light
F39H2.3	VFGNPSSSEVSENR	2	754.852	2	546.254	b	11	28.979	26.4856	Random	light
F39H2.3	VFGNPSSSEVSENR	2	754.852	1	907.412	y	8	28.979	26.4856	Random	light
F39H2.3	VFGNPSSSEVSENR	2	764.324	1	1103.46	b	11	29.301	26.4856	Random	heavy
F39H2.3	VFGNPSSSEVSENR	2	764.324	1	1279.51	y	12	29.301	26.4856	Random	heavy
F39H2.3	VFGNPSSSEVSENR	2	764.324	1	513.213	y	4	29.301	26.4856	Random	heavy
F39H2.3	VFGNPSSSEVSENR	2	764.324	2	552.236	b	11	29.301	26.4856	Random	heavy
F39H2.3	VFGNPSSSEVSENR	2	764.324	1	919.376	y	8	29.301	26.4856	Random	heavy
F13D12.6	GQIGGYVTQYK	2	607.314	1	915.458	y	8	23.9627	30.423	TargetScan	light
F13D12.6	GQIGGYVTQYK	2	607.314	1	1028.54	y	9	23.9627	30.423	TargetScan	light
F13D12.6	GQIGGYVTQYK	2	607.314	1	858.436	y	7	23.9627	30.423	TargetScan	light
F13D12.6	GQIGGYVTQYK	2	607.314	1	539.283	y	4	23.9627	30.423	TargetScan	light
F13D12.6	GQIGGYVTQYK	2	607.314	1	638.351	y	5	23.9627	30.423	TargetScan	light
F13D12.6	GQIGGYVTQYK	2	614.293	1	925.427	y	8	24.2	30.423	TargetScan	heavy
F13D12.6	GQIGGYVTQYK	2	614.293	1	1039.51	y	9	24.2	30.423	TargetScan	heavy
F13D12.6	GQIGGYVTQYK	2	614.293	1	867.409	y	7	24.2	30.423	TargetScan	heavy
F13D12.6	GQIGGYVTQYK	2	614.293	1	545.265	y	4	24.2	30.423	TargetScan	heavy
F13D12.6	GQIGGYVTQYK	2	614.293	1	645.33	y	5	24.2	30.423	TargetScan	heavy
F54D11.1	NATNATAIGGTVIIR	2	736.414	1	715.447	y	7	28.3521	36.0699	Random	light
F54D11.1	NATNATAIGGTVIIR	2	736.414	1	899.568	y	9	28.3521	36.0699	Random	light
F54D11.1	NATNATAIGGTVIIR	2	736.414	1	1185.7	y	12	28.3521	36.0699	Random	light
F54D11.1	NATNATAIGGTVIIR	2	736.414	1	828.531	y	8	28.3521	36.0699	Random	light
F54D11.1	NATNATAIGGTVIIR	2	736.414	1	1000.62	y	10	28.3521	36.0699	Random	light
F54D11.1	NATNATAIGGTVIIR	2	746.385	1	725.416	y	7	28.6911	36.0699	Random	heavy
F54D11.1	NATNATAIGGTVIIR	2	746.385	1	911.532	y	9	28.6911	36.0699	Random	heavy
F54D11.1	NATNATAIGGTVIIR	2	746.385	1	1201.65	y	12	28.6911	36.0699	Random	heavy
F54D11.1	NATNATAIGGTVIIR	2	746.385	1	839.498	y	8	28.6911	36.0699	Random	heavy
F54D11.1	NATNATAIGGTVIIR	2	746.385	1	1013.58	y	10	28.6911	36.0699	Random	heavy
Y66H1A.4	ASSFEPESQLYIDPGK	2	884.425	1	1246.63	y	11	33.3845	41.82	Random	light
Y66H1A.4	ASSFEPESQLYIDPGK	2	884.425	1	416.215	y	4	33.3845	41.82	Random	light
Y66H1A.4	ASSFEPESQLYIDPGK	2	884.425	1	692.362	y	6	33.3845	41.82	Random	light
Y66H1A.4	ASSFEPESQLYIDPGK	2	884.425	2	623.82	y	11	33.3845	41.82	Random	light
Y66H1A.4	ASSFEPESQLYIDPGK	2	884.425	1	1020.54	y	9	33.3845	41.82	Random	light
Y66H1A.4	ASSFEPESQLYIDPGK	2	893.399	1	1259.59	y	11	33.6896	41.82	Random	heavy
Y66H1A.4	ASSFEPESQLYIDPGK	2	893.399	1	421.199	y	4	33.6896	41.82	Random	heavy
Y66H1A.4	ASSFEPESQLYIDPGK	2	893.399	1	699.341	y	6	33.6896	41.82	Random	heavy
Y66H1A.4	ASSFEPESQLYIDPGK	2	893.399	2	630.3	y	11	33.6896	41.82	Random	heavy
Y66H1A.4	ASSFEPESQLYIDPGK	2	893.399	1	1031.5	y	9	33.6896	41.82	Random	heavy
F32D1.5	LNTVITELPQLK	2	684.908	1	941.567	y	8	26.6009	47.3287	Random	light
F32D1.5	LNTVITELPQLK	2	684.908	1	485.309	y	4	26.6009	47.3287	Random	light
F32D1.5	LNTVITELPQLK	2	684.908	1	828.483	y	7	26.6009	47.3287	Random	light
F32D1.5	LNTVITELPQLK	2	684.908	1	598.393	y	5	26.6009	47.3287	Random	light
F32D1.5	LNTVITELPQLK	2	684.908	1	1040.64	y	9	26.6009	47.3287	Random	light
F32D1.5	LNTVITELPQLK	2	692.386	1	951.537	y	8	26.8551	47.3287	Random	heavy
F32D1.5	LNTVITELPQLK	2	692.386	1	491.29	y	4	26.8551	47.3287	Random	heavy
F32D1.5	LNTVITELPQLK	2	692.386	1	837.456	y	7	26.8551	47.3287	Random	heavy
F32D1.5	LNTVITELPQLK	2	692.386	1	605.372	y	5	26.8551	47.3287	Random	heavy
F32D1.5	LNTVITELPQLK	2	692.386	1	1051.6	y	9	26.8551	47.3287	Random	heavy
D1007.6	EYLALPAEIVPATIK	2	814.468	1	1038.62	y	10	31.0059	54.9615	Random	light
D1007.6	EYLALPAEIVPATIK	2	814.468	1	529.335	y	5	31.0059	54.9615	Random	light
D1007.6	EYLALPAEIVPATIK	2	814.468	1	477.235	b	4	31.0059	54.9615	Random	light
D1007.6	EYLALPAEIVPATIK	2	814.468	1	590.319	b	5	31.0059	54.9615	Random	light
D1007.6	EYLALPAEIVPATIK	2	814.468	1	1151.7	y	11	31.0059	54.9615	Random	light
D1007.6	EYLALPAEIVPATIK	2	822.445	1	1049.59	y	10	31.2771	54.9615	Random	heavy
D1007.6	EYLALPAEIVPATIK	2	822.445	1	535.317	y	5	31.2771	54.9615	Random	heavy
D1007.6	EYLALPAEIVPATIK	2	822.445	1	481.223	b	4	31.2771	54.9615	Random	heavy
D1007.6	EYLALPAEIVPATIK	2	822.445	1	595.304	b	5	31.2771	54.9615	Random	heavy
D1007.6	EYLALPAEIVPATIK	2	822.445	1	1163.67	y	11	31.2771	54.9615	Random	heavy
Y69E1A.2	GFDYGWISFPEAAK	3	529.92	1	515.283	y	5	26.6305	58.7405	Random	light
Y69E1A.2	GFDYGWISFPEAAK	3	529.92	1	749.383	y	7	26.6305	58.7405	Random	light
Y69E1A.2	GFDYGWISFPEAAK	3	529.92	1	662.351	y	6	26.6305	58.7405	Random	light
Y69E1A.2	GFDYGWISFPEAAK	3	529.92	1	726.289	b	6	26.6305	58.7405	Random	light
Y69E1A.2	GFDYGWISFPEAAK	3	529.92	1	862.467	y	8	26.6305	58.7405	Random	light
Y69E1A.2	GFDYGWISFPEAAK	3	535.238	1	521.265	y	5	26.8645	58.7405	Random	heavy
Y69E1A.2	GFDYGWISFPEAAK	3	535.238	1	757.359	y	7	26.8645	58.7405	Random	heavy
Y69E1A.2	GFDYGWISFPEAAK	3	535.238	1	669.33	y	6	26.8645	58.7405	Random	heavy
Y69E1A.2	GFDYGWISFPEAAK	3	535.238	1	733.267	b	6	26.8645	58.7405	Random	heavy
Y69E1A.2	GFDYGWISFPEAAK	3	535.238	1	871.44	y	8	26.8645	58.7405	Random	heavy
Y39A1B.3	SITDILTGLFSPGSGNR	3	578.972	1	674.322	y	7	28.7888	70.7367	TargetScan	light
Y39A1B.3	SITDILTGLFSPGSGNR	3	578.972	1	490.237	y	5	28.7888	70.7367	TargetScan	light
Y39A1B.3	SITDILTGLFSPGSGNR	3	578.972	1	821.391	y	8	28.7888	70.7367	TargetScan	light
Y39A1B.3	SITDILTGLFSPGSGNR	3	578.972	1	991.496	y	10	28.7888	70.7367	TargetScan	light
Y39A1B.3	SITDILTGLFSPGSGNR	3	578.972	1	1092.54	y	11	28.7888	70.7367	TargetScan	light
Y39A1B.3	SITDILTGLFSPGSGNR	3	585.951	1	685.289	y	7	29.0959	70.7367	TargetScan	heavy
Y39A1B.3	SITDILTGLFSPGSGNR	3	585.951	1	499.21	y	5	29.0959	70.7367	TargetScan	heavy
Y39A1B.3	SITDILTGLFSPGSGNR	3	585.951	1	833.354	y	8	29.0959	70.7367	TargetScan	heavy
Y39A1B.3	SITDILTGLFSPGSGNR	3	585.951	1	1005.45	y	10	29.0959	70.7367	TargetScan	heavy
Y39A1B.3	SITDILTGLFSPGSGNR	3	585.951	1	1107.5	y	11	29.0959	70.7367	TargetScan	heavy
F40F8.5	SIDDDPSDTTIDHTR	3	560.251	1	414.226	y	3	27.965	25.9097	TargetScan	light
F40F8.5	SIDDDPSDTTIDHTR	3	560.251	2	740.316	y	13	27.965	25.9097	TargetScan	light
F40F8.5	SIDDDPSDTTIDHTR	3	560.251	1	527.253	y	4	27.965	25.9097	TargetScan	light
F40F8.5	SIDDDPSDTTIDHTR	3	560.251	1	737.385	y	6	27.965	25.9097	TargetScan	light
F40F8.5	SIDDDPSDTTIDHTR	3	560.251	1	845.432	y	7	27.965	25.9097	TargetScan	light
F40F8.5	SIDDDPSDTTIDHTR	3	566.899	1	417.202	y	3	28.2575	25.9097	TargetScan	heavy
F40F8.5	SIDDDPSDTTIDHTR	3	566.899	2	750.289	y	13	28.2575	25.9097	TargetScan	heavy
F40F8.5	SIDDDPSDTTIDHTR	3	566.899	1	532.226	y	4	28.2575	25.9097	TargetScan	heavy
F40F8.5	SIDDDPSDTTIDHTR	3	566.899	1	749.352	y	6	28.2575	25.9097	TargetScan	heavy
F40F8.5	SIDDDPSDTTIDHTR	3	566.899	1	859.396	y	7	28.2575	25.9097	TargetScan	heavy
F47B7.2a	TDSTDNLPGYK	2	600.782	1	467.251	y	4	23.7406	26.6977	TargetScan	light
F47B7.2a	TDSTDNLPGYK	2	600.782	1	997.485	y	9	23.7406	26.6977	TargetScan	light
F47B7.2a	TDSTDNLPGYK	2	600.782	1	807.405	y	7	23.7406	26.6977	TargetScan	light
F47B7.2a	TDSTDNLPGYK	2	600.782	1	695.378	y	6	23.7406	26.6977	TargetScan	light
F47B7.2a	TDSTDNLPGYK	2	600.782	1	911.453	y	8	23.7406	26.6977	TargetScan	light
F47B7.2a	TDSTDNLPGYK	2	607.264	1	464.236	y	4	23.961	26.6977	TargetScan	heavy
F47B7.2a	TDSTDNLPGYK	2	607.264	1	1003.45	y	9	23.961	26.6977	TargetScan	heavy
F47B7.2a	TDSTDNLPGYK	2	607.264	1	817.378	y	7	23.961	26.6977	TargetScan	heavy
F47B7.2a	TDSTDNLPGYK	2	607.264	1	695.354	y	6	23.961	26.6977	TargetScan	heavy
F47B7.2a	TDSTDNLPGYK	2	607.264	1	921.422	y	8	23.961	26.6977	TargetScan	heavy
M28.8	DVVTSSAYSGLK	2	605.816	1	910.463	y	9	23.9117	31.6783	TargetScan	light
M28.8	DVVTSSAYSGLK	2	605.816	1	812.415	y	8	23.9117	31.6783	TargetScan	light
M28.8	DVVTSSAYSGLK	2	605.816	1	1015.53	y	10	23.9117	31.6783	TargetScan	light
M28.8	DVVTSSAYSGLK	2	605.816	1	726.383	y	7	23.9117	31.6783	TargetScan	light
M28.8	DVVTSSAYSGLK	2	605.816	1	564.314	y	5	23.9117	31.6783	TargetScan	light
M28.8	DVVTSSAYSGLK	2	612.298	1	924.433	y	9	24.1321	31.6783	TargetScan	heavy
M28.8	DVVTSSAYSGLK	2	612.298	1	822.388	y	8	24.1321	31.6783	TargetScan	heavy
M28.8	DVVTSSAYSGLK	2	612.298	1	1018.5	y	10	24.1321	31.6783	TargetScan	heavy
M28.8	DVVTSSAYSGLK	2	612.298	1	728.359	y	7	24.1321	31.6783	TargetScan	heavy
M28.8	DVVTSSAYSGLK	2	612.298	1	575.296	y	5	24.1321	31.6783	TargetScan	heavy
F13D12.6	VLNAVNNNNLK	2	606.838	1	716.369	y	6	23.9465	25.9248	TargetScan	light
F13D12.6	VLNAVNNNNLK	2	606.838	1	1000.52	y	9	23.9465	25.9248	TargetScan	light
F13D12.6	VLNAVNNNNLK	2	606.838	1	886.475	y	8	23.9465	25.9248	TargetScan	light
F13D12.6	VLNAVNNNNLK	2	606.838	1	815.438	y	7	23.9465	25.9248	TargetScan	light
F13D12.6	VLNAVNNNNLK	2	606.838	1	488.283	y	4	23.9465	25.9248	TargetScan	light
F13D12.6	VLNAVNNNNLK	2	615.313	1	727.336	y	6	24.2346	25.9248	TargetScan	heavy
F13D12.6	VLNAVNNNNLK	2	615.313	1	1015.47	y	9	24.2346	25.9248	TargetScan	heavy
F13D12.6	VLNAVNNNNLK	2	615.313	1	899.436	y	8	24.2346	25.9248	TargetScan	heavy
F13D12.6	VLNAVNNNNLK	2	615.313	1	827.401	y	7	24.2346	25.9248	TargetScan	heavy
F13D12.6	VLNAVNNNNLK	2	615.313	1	495.262	y	4	24.2346	25.9248	TargetScan	heavy
F47B7.2a	TDSTDNLPGYK	2	605.782	1	464.251	y	4	23.9106	26.6977	TargetScan	light
F47B7.2a	TDSTDNLPGYK	2	605.782	1	994.485	y	9	23.9106	26.6977	TargetScan	light
F47B7.2a	TDSTDNLPGYK	2	605.782	1	806.405	y	7	23.9106	26.6977	TargetScan	light
F47B7.2a	TDSTDNLPGYK	2	605.782	1	691.378	y	6	23.9106	26.6977	TargetScan	light
F47B7.2a	TDSTDNLPGYK	2	605.782	1	907.453	y	8	23.9106	26.6977	TargetScan	light
F47B7.2a	TDSTDNLPGYK	2	612.264	1	469.236	y	4	24.131	26.6977	TargetScan	heavy
F47B7.2a	TDSTDNLPGYK	2	612.264	1	1005.45	y	9	24.131	26.6977	TargetScan	heavy
F47B7.2a	TDSTDNLPGYK	2	612.264	1	815.378	y	7	24.131	26.6977	TargetScan	heavy
F47B7.2a	TDSTDNLPGYK	2	612.264	1	699.354	y	6	24.131	26.6977	TargetScan	heavy
F47B7.2a	TDSTDNLPGYK	2	612.264	1	917.422	y	8	24.131	26.6977	TargetScan	heavy
M28.8	DVVTSSAYSGLK	2	613.816	1	913.463	y	9	24.1837	31.6783	TargetScan	light
M28.8	DVVTSSAYSGLK	2	613.816	1	812.415	y	8	24.1837	31.6783	TargetScan	light
M28.8	DVVTSSAYSGLK	2	613.816	1	1012.53	y	10	24.1837	31.6783	TargetScan	light
M28.8	DVVTSSAYSGLK	2	613.816	1	725.383	y	7	24.1837	31.6783	TargetScan	light
M28.8	DVVTSSAYSGLK	2	613.816	1	567.314	y	5	24.1837	31.6783	TargetScan	light
M28.8	DVVTSSAYSGLK	2	620.298	1	923.433	y	9	24.4041	31.6783	TargetScan	heavy
M28.8	DVVTSSAYSGLK	2	620.298	1	821.388	y	8	24.4041	31.6783	TargetScan	heavy
M28.8	DVVTSSAYSGLK	2	620.298	1	1023.5	y	10	24.4041	31.6783	TargetScan	heavy
M28.8	DVVTSSAYSGLK	2	620.298	1	733.359	y	7	24.4041	31.6783	TargetScan	heavy
M28.8	DVVTSSAYSGLK	2	620.298	1	573.296	y	5	24.4041	31.6783	TargetScan	heavy
F59F5.7	DGEIDADSPLIK	2	636.819	1	858.457	y	8	24.9658	36.5421	TargetScan	light
F59F5.7	DGEIDADSPLIK	2	636.819	1	971.541	y	9	24.9658	36.5421	TargetScan	light
F59F5.7	DGEIDADSPLIK	2	636.819	1	743.43	y	7	24.9658	36.5421	TargetScan	light
F59F5.7	DGEIDADSPLIK	2	636.819	1	557.366	y	5	24.9658	36.5421	TargetScan	light
F59F5.7	DGEIDADSPLIK	2	636.819	1	470.334	y	4	24.9658	36.5421	TargetScan	light
F59F5.7	DGEIDADSPLIK	2	643.3	1	867.43	y	8	25.1862	36.5421	TargetScan	heavy
F59F5.7	DGEIDADSPLIK	2	643.3	1	981.511	y	9	25.1862	36.5421	TargetScan	heavy
F59F5.7	DGEIDADSPLIK	2	643.3	1	751.406	y	7	25.1862	36.5421	TargetScan	heavy
F59F5.7	DGEIDADSPLIK	2	643.3	1	563.348	y	5	25.1862	36.5421	TargetScan	heavy
F59F5.7	DGEIDADSPLIK	2	643.3	1	475.319	y	4	25.1862	36.5421	TargetScan	heavy
Y47G6A.8	GLSQVIADNAPSAIK	2	742.409	1	999.547	y	10	28.5559	41.9222	Random	light
Y47G6A.8	GLSQVIADNAPSAIK	2	742.409	1	886.463	y	9	28.5559	41.9222	Random	light
Y47G6A.8	GLSQVIADNAPSAIK	2	742.409	1	515.319	y	5	28.5559	41.9222	Random	light
Y47G6A.8	GLSQVIADNAPSAIK	2	742.409	1	1098.62	y	11	28.5559	41.9222	Random	light
Y47G6A.8	GLSQVIADNAPSAIK	2	742.409	1	485.272	b	5	28.5559	41.9222	Random	light
Y47G6A.8	GLSQVIADNAPSAIK	2	751.383	1	1011.51	y	10	28.861	41.9222	Random	heavy
Y47G6A.8	GLSQVIADNAPSAIK	2	751.383	1	897.43	y	9	28.861	41.9222	Random	heavy
Y47G6A.8	GLSQVIADNAPSAIK	2	751.383	1	521.301	y	5	28.861	41.9222	Random	heavy
Y47G6A.8	GLSQVIADNAPSAIK	2	751.383	1	1111.58	y	11	28.861	41.9222	Random	heavy
Y47G6A.8	GLSQVIADNAPSAIK	2	751.383	1	491.254	b	5	28.861	41.9222	Random	heavy
F30H5.1	DFVDATGILVQR	2	667.359	1	972.548	y	9	26.0042	48.5376	TargetScan	light
F30H5.1	DFVDATGILVQR	2	667.359	1	685.436	y	6	26.0042	48.5376	TargetScan	light
F30H5.1	DFVDATGILVQR	2	667.359	1	786.484	y	7	26.0042	48.5376	TargetScan	light
F30H5.1	DFVDATGILVQR	2	667.359	1	515.331	y	4	26.0042	48.5376	TargetScan	light
F30H5.1	DFVDATGILVQR	2	667.359	1	857.521	y	8	26.0042	48.5376	TargetScan	light
F30H5.1	DFVDATGILVQR	2	675.335	1	985.509	y	9	26.2754	48.5376	TargetScan	heavy
F30H5.1	DFVDATGILVQR	2	675.335	1	695.406	y	6	26.2754	48.5376	TargetScan	heavy
F30H5.1	DFVDATGILVQR	2	675.335	1	797.451	y	7	26.2754	48.5376	TargetScan	heavy
F30H5.1	DFVDATGILVQR	2	675.335	1	523.306	y	4	26.2754	48.5376	TargetScan	heavy
F30H5.1	DFVDATGILVQR	2	675.335	1	869.485	y	8	26.2754	48.5376	TargetScan	heavy
Y69E1A.2	NVGSIQLLVHLPDNLR	2	894.509	1	614.326	y	5	33.7273	53.9385	Random	light
Y69E1A.2	NVGSIQLLVHLPDNLR	2	894.509	1	864.469	y	7	33.7273	53.9385	Random	light
Y69E1A.2	NVGSIQLLVHLPDNLR	2	894.509	1	963.538	y	8	33.7273	53.9385	Random	light
Y69E1A.2	NVGSIQLLVHLPDNLR	2	894.509	1	402.246	y	3	33.7273	53.9385	Random	light
Y69E1A.2	NVGSIQLLVHLPDNLR	2	894.509	1	727.41	y	6	33.7273	53.9385	Random	light
Y69E1A.2	NVGSIQLLVHLPDNLR	2	906.474	1	623.299	y	5	34.1341	53.9385	Random	heavy
Y69E1A.2	NVGSIQLLVHLPDNLR	2	906.474	1	877.43	y	7	34.1341	53.9385	Random	heavy
Y69E1A.2	NVGSIQLLVHLPDNLR	2	906.474	1	977.496	y	8	34.1341	53.9385	Random	heavy
Y69E1A.2	NVGSIQLLVHLPDNLR	2	906.474	1	409.225	y	3	34.1341	53.9385	Random	heavy
Y69E1A.2	NVGSIQLLVHLPDNLR	2	906.474	1	737.38	y	6	34.1341	53.9385	Random	heavy
F39H2.3	LQTQNGLAAFLLNTK	2	816.459	1	1047.62	y	10	31.0736	55.7114	Random	light
F39H2.3	LQTQNGLAAFLLNTK	2	816.459	1	877.515	y	8	31.0736	55.7114	Random	light
F39H2.3	LQTQNGLAAFLLNTK	2	816.459	1	806.478	y	7	31.0736	55.7114	Random	light
F39H2.3	LQTQNGLAAFLLNTK	2	816.459	1	735.44	y	6	31.0736	55.7114	Random	light
F39H2.3	LQTQNGLAAFLLNTK	2	816.459	1	475.288	y	4	31.0736	55.7114	Random	light
F39H2.3	LQTQNGLAAFLLNTK	2	826.43	1	1059.58	y	10	31.4126	55.7114	Random	heavy
F39H2.3	LQTQNGLAAFLLNTK	2	826.43	1	887.485	y	8	31.4126	55.7114	Random	heavy
F39H2.3	LQTQNGLAAFLLNTK	2	826.43	1	815.45	y	7	31.4126	55.7114	Random	heavy
F39H2.3	LQTQNGLAAFLLNTK	2	826.43	1	743.416	y	6	31.4126	55.7114	Random	heavy
F39H2.3	LQTQNGLAAFLLNTK	2	826.43	1	481.27	y	4	31.4126	55.7114	Random	heavy
ZK616.4	EGLIEDWELFEK	2	754.369	1	1095.5	y	8	28.9625	60.0044	TargetScan	light
ZK616.4	EGLIEDWELFEK	2	754.369	1	966.457	y	7	28.9625	60.0044	TargetScan	light
ZK616.4	EGLIEDWELFEK	2	754.369	1	1208.58	y	9	28.9625	60.0044	TargetScan	light
ZK616.4	EGLIEDWELFEK	2	754.369	1	851.43	y	6	28.9625	60.0044	TargetScan	light
ZK616.4	EGLIEDWELFEK	2	754.369	1	536.308	y	4	28.9625	60.0044	TargetScan	light
ZK616.4	EGLIEDWELFEK	2	761.349	1	1105.47	y	8	29.1999	60.0044	TargetScan	heavy
ZK616.4	EGLIEDWELFEK	2	761.349	1	975.43	y	7	29.1999	60.0044	TargetScan	heavy
ZK616.4	EGLIEDWELFEK	2	761.349	1	1219.55	y	9	29.1999	60.0044	TargetScan	heavy
ZK616.4	EGLIEDWELFEK	2	761.349	1	859.406	y	6	29.1999	60.0044	TargetScan	heavy
ZK616.4	EGLIEDWELFEK	2	761.349	1	541.293	y	4	29.1999	60.0044	TargetScan	heavy
F35G12.2	SSELVQSVLDFIEK	2	797.422	1	950.52	y	8	30.4263	73.8935	Random	light
F35G12.2	SSELVQSVLDFIEK	2	797.422	1	1078.58	y	9	30.4263	73.8935	Random	light
F35G12.2	SSELVQSVLDFIEK	2	797.422	1	1177.65	y	10	30.4263	73.8935	Random	light
F35G12.2	SSELVQSVLDFIEK	2	797.422	1	764.419	y	6	30.4263	73.8935	Random	light
F35G12.2	SSELVQSVLDFIEK	2	797.422	1	516.267	b	5	30.4263	73.8935	Random	light
F35G12.2	SSELVQSVLDFIEK	2	805.398	1	959.493	y	8	30.6975	73.8935	Random	heavy
F35G12.2	SSELVQSVLDFIEK	2	805.398	1	1089.55	y	9	30.6975	73.8935	Random	heavy
F35G12.2	SSELVQSVLDFIEK	2	805.398	1	1189.61	y	10	30.6975	73.8935	Random	heavy
F35G12.2	SSELVQSVLDFIEK	2	805.398	1	771.398	y	6	30.6975	73.8935	Random	heavy
F35G12.2	SSELVQSVLDFIEK	2	805.398	1	521.252	b	5	30.6975	73.8935	Random	heavy
Y66H1A.4	SYDGGSFGGQNNK	2	665.786	1	965.444	y	10	25.9507	25.9376	Random	light
Y66H1A.4	SYDGGSFGGQNNK	2	665.786	1	617.301	y	6	25.9507	25.9376	Random	light
Y66H1A.4	SYDGGSFGGQNNK	2	665.786	1	1080.47	y	11	25.9507	25.9376	Random	light
Y66H1A.4	SYDGGSFGGQNNK	2	665.786	1	764.369	y	7	25.9507	25.9376	Random	light
Y66H1A.4	SYDGGSFGGQNNK	2	665.786	1	908.423	y	9	25.9507	25.9376	Random	light
Y66H1A.4	SYDGGSFGGQNNK	2	674.261	1	979.402	y	10	26.2389	25.9376	Random	heavy
Y66H1A.4	SYDGGSFGGQNNK	2	674.261	1	627.271	y	6	26.2389	25.9376	Random	heavy
Y66H1A.4	SYDGGSFGGQNNK	2	674.261	1	1095.43	y	11	26.2389	25.9376	Random	heavy
Y66H1A.4	SYDGGSFGGQNNK	2	674.261	1	775.336	y	7	26.2389	25.9376	Random	heavy
Y66H1A.4	SYDGGSFGGQNNK	2	674.261	1	921.384	y	9	26.2389	25.9376	Random	heavy
C32E8.3	ADTTENTGYVGAYK	2	745.343	1	438.235	y	4	28.6557	26.855	Random	light
C32E8.3	ADTTENTGYVGAYK	2	745.343	1	972.479	y	9	28.6557	26.855	Random	light
C32E8.3	ADTTENTGYVGAYK	2	745.343	1	757.388	y	7	28.6557	26.855	Random	light
C32E8.3	ADTTENTGYVGAYK	2	745.343	1	858.436	y	8	28.6557	26.855	Random	light
C32E8.3	ADTTENTGYVGAYK	2	745.343	1	537.304	y	5	28.6557	26.855	Random	light
C32E8.3	ADTTENTGYVGAYK	2	753.32	1	443.22	y	4	28.9269	26.855	Random	heavy
C32E8.3	ADTTENTGYVGAYK	2	753.32	1	983.446	y	9	28.9269	26.855	Random	heavy
C32E8.3	ADTTENTGYVGAYK	2	753.32	1	765.364	y	7	28.9269	26.855	Random	heavy
C32E8.3	ADTTENTGYVGAYK	2	753.32	1	867.409	y	8	28.9269	26.855	Random	heavy
C32E8.3	ADTTENTGYVGAYK	2	753.32	1	543.285	y	5	28.9269	26.855	Random	heavy
C26E6.2	ASHVSQALPIAPQQIK	2	844.478	1	894.541	y	8	32.0263	31.9173	TargetScan	light
C26E6.2	ASHVSQALPIAPQQIK	2	844.478	1	613.367	y	5	32.0263	31.9173	TargetScan	light
C26E6.2	ASHVSQALPIAPQQIK	2	844.478	1	794.416	b	8	32.0263	31.9173	TargetScan	light
C26E6.2	ASHVSQALPIAPQQIK	2	844.478	1	681.332	b	7	32.0263	31.9173	TargetScan	light
C26E6.2	ASHVSQALPIAPQQIK	2	844.478	1	395.204	b	4	32.0263	31.9173	TargetScan	light
C26E6.2	ASHVSQALPIAPQQIK	2	855.445	1	905.508	y	8	32.3991	31.9173	TargetScan	heavy
C26E6.2	ASHVSQALPIAPQQIK	2	855.445	1	621.343	y	5	32.3991	31.9173	TargetScan	heavy
C26E6.2	ASHVSQALPIAPQQIK	2	855.445	1	805.383	b	8	32.3991	31.9173	TargetScan	heavy
C26E6.2	ASHVSQALPIAPQQIK	2	855.445	1	691.302	b	7	32.3991	31.9173	TargetScan	heavy
C26E6.2	ASHVSQALPIAPQQIK	2	855.445	1	401.186	b	4	32.3991	31.9173	TargetScan	heavy
F18A1.5	VEQGEQLGHAFTFR	2	809.902	1	835.422	y	7	30.8507	36.5789	TargetScan	light
F18A1.5	VEQGEQLGHAFTFR	2	809.902	1	641.341	y	5	30.8507	36.5789	TargetScan	light
F18A1.5	VEQGEQLGHAFTFR	2	809.902	1	570.304	y	4	30.8507	36.5789	TargetScan	light
F18A1.5	VEQGEQLGHAFTFR	2	809.902	1	948.506	y	8	30.8507	36.5789	TargetScan	light
F18A1.5	VEQGEQLGHAFTFR	2	809.902	1	423.236	y	3	30.8507	36.5789	TargetScan	light
F18A1.5	VEQGEQLGHAFTFR	2	820.371	1	847.385	y	7	31.2066	36.5789	TargetScan	heavy
F18A1.5	VEQGEQLGHAFTFR	2	820.371	1	649.317	y	5	31.2066	36.5789	TargetScan	heavy
F18A1.5	VEQGEQLGHAFTFR	2	820.371	1	577.283	y	4	31.2066	36.5789	TargetScan	heavy
F18A1.5	VEQGEQLGHAFTFR	2	820.371	1	961.466	y	8	31.2066	36.5789	TargetScan	heavy
F18A1.5	VEQGEQLGHAFTFR	2	820.371	1	429.217	y	3	31.2066	36.5789	TargetScan	heavy
Y47G6A.8	GLSQVIADNAPSAIK	3	495.275	1	515.319	y	5	25.1061	41.9222	Random	light
Y47G6A.8	GLSQVIADNAPSAIK	3	495.275	1	418.267	y	4	25.1061	41.9222	Random	light
Y47G6A.8	GLSQVIADNAPSAIK	3	495.275	1	886.463	y	9	25.1061	41.9222	Random	light
Y47G6A.8	GLSQVIADNAPSAIK	3	495.275	1	815.426	y	8	25.1061	41.9222	Random	light
Y47G6A.8	GLSQVIADNAPSAIK	3	495.275	1	586.356	y	6	25.1061	41.9222	Random	light
Y47G6A.8	GLSQVIADNAPSAIK	3	501.258	1	521.301	y	5	25.3693	41.9222	Random	heavy
Y47G6A.8	GLSQVIADNAPSAIK	3	501.258	1	423.251	y	4	25.3693	41.9222	Random	heavy
Y47G6A.8	GLSQVIADNAPSAIK	3	501.258	1	897.43	y	9	25.3693	41.9222	Random	heavy
Y47G6A.8	GLSQVIADNAPSAIK	3	501.258	1	825.396	y	8	25.3693	41.9222	Random	heavy
Y47G6A.8	GLSQVIADNAPSAIK	3	501.258	1	593.335	y	6	25.3693	41.9222	Random	heavy
F45H10.2	GFFDQAFVK	2	529.768	1	854.441	y	7	21.3261	48.6085	Random	light
F45H10.2	GFFDQAFVK	2	529.768	1	707.373	y	6	21.3261	48.6085	Random	light
F45H10.2	GFFDQAFVK	2	529.768	1	592.346	y	5	21.3261	48.6085	Random	light
F45H10.2	GFFDQAFVK	2	529.768	1	464.287	y	4	21.3261	48.6085	Random	light
F45H10.2	GFFDQAFVK	2	529.768	1	393.25	y	3	21.3261	48.6085	Random	light
F45H10.2	GFFDQAFVK	2	535.253	1	863.414	y	7	21.5126	48.6085	Random	heavy
F45H10.2	GFFDQAFVK	2	535.253	1	715.349	y	6	21.5126	48.6085	Random	heavy
F45H10.2	GFFDQAFVK	2	535.253	1	599.325	y	5	21.5126	48.6085	Random	heavy
F45H10.2	GFFDQAFVK	2	535.253	1	469.272	y	4	21.5126	48.6085	Random	heavy
F45H10.2	GFFDQAFVK	2	535.253	1	397.238	y	3	21.5126	48.6085	Random	heavy
Y69E1A.2	NVGSIQLLVHLPDNLR	3	596.675	2	787.955	y	14	29.5677	53.9385	Random	light
Y69E1A.2	NVGSIQLLVHLPDNLR	3	596.675	1	614.326	y	5	29.5677	53.9385	Random	light
Y69E1A.2	NVGSIQLLVHLPDNLR	3	596.675	1	864.469	y	7	29.5677	53.9385	Random	light
Y69E1A.2	NVGSIQLLVHLPDNLR	3	596.675	1	402.246	y	3	29.5677	53.9385	Random	light
Y69E1A.2	NVGSIQLLVHLPDNLR	3	596.675	1	727.41	y	6	29.5677	53.9385	Random	light
Y69E1A.2	NVGSIQLLVHLPDNLR	3	604.652	2	798.423	y	14	29.9187	53.9385	Random	heavy
Y69E1A.2	NVGSIQLLVHLPDNLR	3	604.652	1	623.299	y	5	29.9187	53.9385	Random	heavy
Y69E1A.2	NVGSIQLLVHLPDNLR	3	604.652	1	877.43	y	7	29.9187	53.9385	Random	heavy
Y69E1A.2	NVGSIQLLVHLPDNLR	3	604.652	1	409.225	y	3	29.9187	53.9385	Random	heavy
Y69E1A.2	NVGSIQLLVHLPDNLR	3	604.652	1	737.38	y	6	29.9187	53.9385	Random	heavy
F39H2.3	LQTQNGLAAFLLNTK	3	544.642	1	735.44	y	6	27.2782	55.7114	Random	light
F39H2.3	LQTQNGLAAFLLNTK	3	544.642	1	588.372	y	5	27.2782	55.7114	Random	light
F39H2.3	LQTQNGLAAFLLNTK	3	544.642	1	475.288	y	4	27.2782	55.7114	Random	light
F39H2.3	LQTQNGLAAFLLNTK	3	544.642	1	806.478	y	7	27.2782	55.7114	Random	light
F39H2.3	LQTQNGLAAFLLNTK	3	544.642	1	642.321	b	6	27.2782	55.7114	Random	light
F39H2.3	LQTQNGLAAFLLNTK	3	551.289	1	743.416	y	6	27.5707	55.7114	Random	heavy
F39H2.3	LQTQNGLAAFLLNTK	3	551.289	1	595.351	y	5	27.5707	55.7114	Random	heavy
F39H2.3	LQTQNGLAAFLLNTK	3	551.289	1	481.27	y	4	27.5707	55.7114	Random	heavy
F39H2.3	LQTQNGLAAFLLNTK	3	551.289	1	815.45	y	7	27.5707	55.7114	Random	heavy
F39H2.3	LQTQNGLAAFLLNTK	3	551.289	1	651.294	b	6	27.5707	55.7114	Random	heavy
C26E6.2	SLITALEGFTGK	2	618.845	1	923.484	y	9	24.3547	60.6361	TargetScan	light
C26E6.2	SLITALEGFTGK	2	618.845	1	822.436	y	8	24.3547	60.6361	TargetScan	light
C26E6.2	SLITALEGFTGK	2	618.845	1	751.399	y	7	24.3547	60.6361	TargetScan	light
C26E6.2	SLITALEGFTGK	2	618.845	1	1036.57	y	10	24.3547	60.6361	TargetScan	light
C26E6.2	SLITALEGFTGK	2	618.845	1	509.272	y	5	24.3547	60.6361	TargetScan	light
C26E6.2	SLITALEGFTGK	2	625.326	1	933.454	y	9	24.5751	60.6361	TargetScan	heavy
C26E6.2	SLITALEGFTGK	2	625.326	1	831.409	y	8	24.5751	60.6361	TargetScan	heavy
C26E6.2	SLITALEGFTGK	2	625.326	1	759.375	y	7	24.5751	60.6361	TargetScan	heavy
C26E6.2	SLITALEGFTGK	2	625.326	1	1047.53	y	10	24.5751	60.6361	TargetScan	heavy
C26E6.2	SLITALEGFTGK	2	625.326	1	515.254	y	5	24.5751	60.6361	TargetScan	heavy
C30B5.7	LVAILFPIFYR	2	676.41	1	842.456	y	6	26.3119	74.4569	TargetScan	light
C30B5.7	LVAILFPIFYR	2	676.41	1	955.541	y	7	26.3119	74.4569	TargetScan	light
C30B5.7	LVAILFPIFYR	2	676.41	1	695.388	y	5	26.3119	74.4569	TargetScan	light
C30B5.7	LVAILFPIFYR	2	676.41	1	1139.66	y	9	26.3119	74.4569	TargetScan	light
C30B5.7	LVAILFPIFYR	2	676.41	1	1068.62	y	8	26.3119	74.4569	TargetScan	light
C30B5.7	LVAILFPIFYR	2	683.39	1	851.429	y	6	26.5492	74.4569	TargetScan	heavy
C30B5.7	LVAILFPIFYR	2	683.39	1	965.51	y	7	26.5492	74.4569	TargetScan	heavy
C30B5.7	LVAILFPIFYR	2	683.39	1	703.364	y	5	26.5492	74.4569	TargetScan	heavy
C30B5.7	LVAILFPIFYR	2	683.39	1	1151.63	y	9	26.5492	74.4569	TargetScan	heavy
C30B5.7	LVAILFPIFYR	2	683.39	1	1079.59	y	8	26.5492	74.4569	TargetScan	heavy
Y66H1A.4	SYDGGSFGGQNNK	2	661.786	1	961.444	y	10	25.8147	25.9376	Random	light
Y66H1A.4	SYDGGSFGGQNNK	2	661.786	1	621.301	y	6	25.8147	25.9376	Random	light
Y66H1A.4	SYDGGSFGGQNNK	2	661.786	1	1080.47	y	11	25.8147	25.9376	Random	light
Y66H1A.4	SYDGGSFGGQNNK	2	661.786	1	768.369	y	7	25.8147	25.9376	Random	light
Y66H1A.4	SYDGGSFGGQNNK	2	661.786	1	905.423	y	9	25.8147	25.9376	Random	light
Y66H1A.4	SYDGGSFGGQNNK	2	670.261	1	980.402	y	10	26.1029	25.9376	Random	heavy
Y66H1A.4	SYDGGSFGGQNNK	2	670.261	1	626.271	y	6	26.1029	25.9376	Random	heavy
Y66H1A.4	SYDGGSFGGQNNK	2	670.261	1	1099.43	y	11	26.1029	25.9376	Random	heavy
Y66H1A.4	SYDGGSFGGQNNK	2	670.261	1	779.336	y	7	26.1029	25.9376	Random	heavy
Y66H1A.4	SYDGGSFGGQNNK	2	670.261	1	925.384	y	9	26.1029	25.9376	Random	heavy
F57B10.10	SEFTAVSTER	2	557.772	1	914.463	y	8	22.2782	27.0586	Random	light
F57B10.10	SEFTAVSTER	2	557.772	1	661.347	y	6	22.2782	27.0586	Random	light
F57B10.10	SEFTAVSTER	2	557.772	1	763.395	y	7	22.2782	27.0586	Random	light
F57B10.10	SEFTAVSTER	2	557.772	1	487.242	y	4	22.2782	27.0586	Random	light
F57B10.10	SEFTAVSTER	2	557.772	1	592.31	y	5	22.2782	27.0586	Random	light
F57B10.10	SEFTAVSTER	2	564.253	1	925.43	y	8	22.4986	27.0586	Random	heavy
F57B10.10	SEFTAVSTER	2	564.253	1	668.32	y	6	22.4986	27.0586	Random	heavy
F57B10.10	SEFTAVSTER	2	564.253	1	773.365	y	7	22.4986	27.0586	Random	heavy
F57B10.10	SEFTAVSTER	2	564.253	1	501.22	y	4	22.4986	27.0586	Random	heavy
F57B10.10	SEFTAVSTER	2	564.253	1	594.286	y	5	22.4986	27.0586	Random	heavy
F30H5.1	EQLGNVGPAFQDAK	2	729.37	1	836.416	y	8	28.1126	33.4848	TargetScan	light
F30H5.1	EQLGNVGPAFQDAK	2	729.37	1	1105.55	y	11	28.1126	33.4848	TargetScan	light
F30H5.1	EQLGNVGPAFQDAK	2	729.37	1	775.394	y	7	28.1126	33.4848	TargetScan	light
F30H5.1	EQLGNVGPAFQDAK	2	729.37	1	936.484	y	9	28.1126	33.4848	TargetScan	light
F30H5.1	EQLGNVGPAFQDAK	2	729.37	1	1217.63	y	12	28.1126	33.4848	TargetScan	light
F30H5.1	EQLGNVGPAFQDAK	2	738.344	1	838.386	y	8	28.4177	33.4848	TargetScan	heavy
F30H5.1	EQLGNVGPAFQDAK	2	738.344	1	1113.51	y	11	28.4177	33.4848	TargetScan	heavy
F30H5.1	EQLGNVGPAFQDAK	2	738.344	1	789.367	y	7	28.4177	33.4848	TargetScan	heavy
F30H5.1	EQLGNVGPAFQDAK	2	738.344	1	945.451	y	9	28.4177	33.4848	TargetScan	heavy
F30H5.1	EQLGNVGPAFQDAK	2	738.344	1	1228.59	y	12	28.4177	33.4848	TargetScan	heavy
RT peptide	ADVTPADFSEWSK	2	726.835	1	1066.48	y	9	28.0264	43.1555
RT peptide	ADVTPADFSEWSK	2	726.835	2	533.746	y	9	28.0264	43.1555
RT peptide	DGLDAASYYAPVR	2	699.338	1	855.436	y	7	27.0915	38.6995
RT peptide	DGLDAASYYAPVR	2	699.338	1	926.474	y	8	27.0915	38.6995
RT peptide	GAGSSEPVTGLDAK	2	644.822	1	800.452	y	8	25.2379	25.7866
RT peptide	GAGSSEPVTGLDAK	2	644.822	1	604.331	y	6	25.2379	25.7866
RT peptide	GTFIIDPAAVIR	2	636.869	1	626.399	y	6	24.9675	55.3095
RT peptide	GTFIIDPAAVIR	2	636.869	1	854.51	y	8	24.9675	55.3095
RT peptide	GTFIIDPGGVIR	2	622.853	1	598.368	y	6	24.491	49.4481
RT peptide	GTFIIDPGGVIR	2	622.853	1	713.395	y	7	24.491	49.4481
RT peptide	LFLQFGAQGSPFLK	2	776.929	1	904.489	y	9	29.7296	59.6537
RT peptide	LFLQFGAQGSPFLK	2	776.929	1	1051.56	y	10	29.7296	59.6537
RT peptide	LGGNEQVTR	2	487.257	1	860.423	y	8	19.8807	23.5713
RT peptide	LGGNEQVTR	2	487.257	1	503.294	y	4	19.8807	23.5713
RT peptide	TPVISGGPYEYR	2	669.838	1	928.416	y	8	26.0885	33.2214
RT peptide	TPVISGGPYEYR	2	669.838	1	1041.5	y	9	26.0885	33.2214
RT peptide	TPVITGAPYEYR	2	683.853	1	956.448	y	8	26.565	34.9942
RT peptide	TPVITGAPYEYR	2	683.853	1	855.4	y	7	26.565	34.9942
RT peptide	VEATFGVDESNAK	2	683.827	1	819.389	b	8	26.5641	27.1524
RT peptide	VEATFGVDESNAK	2	683.827	1	966.453	y	9	26.5641	27.1524
RT peptide	YILAGVENSK	2	547.297	1	817.442	y	8	21.9221	30.698
RT peptide	YILAGVENSK	2	547.297	1	633.321	y	6	21.9221	30.698
