# Supplementary material for: Cooperative target mRNA destabilization and translation inhibition by miR-58 microRNA family in C. elegans
Source: HighWire-hosted journal article supplement (doi:10.1101/gr.183160.114), 2015-07-31
Supplement: Supplemental_Table_7.xlsx [file Supplemental_Table_7.xlsx]

## Sheet: Tabelle1
Gene ID	Gene name	# of sites	Sequence (WT)	Sequence (MUT)	TargetScan predicted specificity
C30B5.7	C30B5.7	1	TTCTCAAAATACAACCTTTACCTTCAGTTTTTAGTGCTCATTTGATATAGTTTTTAATTTATTAATTTTCTTTCCAAAATCGAAATCGATCTCTTCTGACCTGTATTTTAGTTCAAAGTGTACATTACACTGGTCTCATTGCTTGTGATTCATCATCTGTATTTTCATCCTGTTGTTGTCAAAATCCGTCACAAATAAAATATTTATATGAGG	TTCTCAAAATACAACCTTTACCTTCAGTTTTTAGTGCTCATTTGATATAGTTTTTAATTTATTAATTTTCTTTCCAAAATCGAAATCTTCTGACCTGTATTTTAGTTCAAAGTGTACATTACACTGGTCTCATTGCTTGTGATTCATCATCTGTATTTTCATCCTGTTGTTGTCAAAATCCGTCACAAATAAAATATTTATATGAGG	miR-58.1/80/81/82
C37H5.13	C37H5.13	1	TAGTAATAATGAAACTTGGAATCTTCATTTATTTATTGTACATCTTTTTTTTTGAAACTTCGATCAAAAATATAAACGGACATTCGTGTAGTGTTAAGTGTAGTTTTAAGTTTTTCTTTTGAATGATCTCTTTCTTTTTTAAAAAAAAAAGTTTTTTTAGTT	TAGTAATAATGAAACTTGGAATCTTCATTTATTTATTGTACATCTTTTTTTTTGAAACTTCGATCAAAAATATAAACGGACATTCGTGTAGTGTTAAGTGTAGTTTTAAGTTTTTCTTTTGAATTTTCTTTTTTAAAAAAAAAAGTTTTTTTAGTT	miR-58.1/80/81/82
C07H6.5	cgh-1	2	ACACTAGTTCTCATATCCCCAAACCTCCAAAACACACTGGTCGCCTACGTTTTTTTTTTCCATTCTAGTGATCTCGTCCAGATTGTGTATGTTCTCTATTTTCCTTTAAATGCACAGTTTGTGCTAAATTTAATATTGTTCAAGCATAAGCATCTTTCCTTCCTGTTTTCTCAAATCCCCGCACATTATTTGTATCCCATCCACCTTCCCGGACCCCATCAACCCGTTCCACTTATATGCGGTGTAAAATTCTAATTTTTCTTTTTCATTAGTTTCCCCATACCCTCCAACTTGCAGTCATGGACTGTAACTCATTCAAGTCGTTGTGTTTTACATAGTCATTTAAGTTGGTCTTTATGCTCCCAAAGTAAATTGTTTCGACATTAATGTGTCGTTGCA…	ACACTAGTTCTCATATCCCCAAACCTCCAAAACACACTGGTCGCCTACGTTTTTTTTTTCCATTCTAGTGTCCAGATTGTGTATGTTCTCTATTTTCCTTTAAATGCACAGTTTGTGCTAAATTTAATATTGTTCAAGCATAAGCATCTTTCCTTCCTGTTTTCTCAAATCCCCGCACATTATTTGTATCCCATCCACCTTCCCGGACCCCATCAACCCGTTCCACTTATATGCGGTGTAAAATTCTAATTTTTCTTTTTCATTAGTTTCCCCATACCCTCCAACTTGCAGTCATGGACTGTAACTCATTCAAGTCGTTGTGTTTTACATAGTCATTTAAGTTGGTCTTTATGCTCCCAAAGTAAATTGTTTCGACATTAATGTGTCGTTGCAAAATAT…	miR-58.1/80/81/82
C09D1.2	isw-1	2	TTACATTCATATATTCTTTTTATCTCCTTCTCCATTCATTGCTTGATTAATGTCGATCTCTATCCTCCCTTTGATTACTGCTAAATCATCTCATCTCTCATCTTATCTCCTCATTTCTATTTGAGTATTTCTAAGCACACCTACCTATGCTATTTATTCACCGTATCTTCTTTTTATATCTTATTAATGATTGTAAATTACTCAAATAAACTCGGAGTCTTG	TTACATTCATATATTCTTTTTATCTCCTTCTCCATTCATTGCTTGATTAATGTCTATCCTCCCTTTGATTACTGCTAAATCATCTCTCATCTTATCTCCTCATTTCTATTTGAGTATTTCTAAGCACACCTACCTATGCTATTTATTCACCGTATCTTCTTTTTATATCTTATTAATGATTGTAAATTACTCAAATAAACTCGGAGTCTTG	miR-58.1/80/81/82
Y22F5A.4	lys-1	1	AATATTTATGTTGTGATCTCTTACCTATTTGTATTATTTCAATAAACAATCCTAGCTTTATTAAAATTTTATTTTAAAAAATACTGAAATATACCATATAACATACCAGATATATACCAGAAATTAAAATGAATGATCAGT	AATATTTATGTTGTTTACCTATTTGTATTATTTCAATAAACAATCCTAGCTTTATTAAAATTTTATTTTAAAAAATACTGAAATATACCATATAACATACCAGATATATACCAGAAATTAAAATGAATGATCAGT	miR-80/81/82
C09D1.2	clec-89	2	TATTTCCCTAATTGATTTGTTTAGTTAATTTCCTAGTCATTGCTCATTCACTTTCTTGTTTTTCCCGCTGTTCCATTCCAATCAACCCAAGAATCTCATTTCAATACCGATCTCTGAATAAACTGTGTTTTCAT	TATTTCCCTAATTGATTTGTTTAGTTAATTTCCTAGTCATTGCTCATTCACTTTCTTGTTTTTCCCGCTGTTCCATTCCAATCAACCCAAGAATTTCAATACCTGAATAAACTGTGTTTTCAT	miR-58.1/80/81/82
K06A4.1	nas-3	1	TAATTAATTGATCAAGTTCATAATTATTATTTTTCAATTTTTCCCCATCATCTCTTTCCTTTGCTCTTATTTGTATCCGATCTTTGTGCTTCAACACGTGCTTCGCTTACGATTCTTGACGATCTCAAACGTTTTTTGTTTTTATGTATGGATTAATATTTATTTAATATAATAAATTGGTTAAATTAAT	TAATTAATTGATCAAGTTCATAATTATTATTTTTCAATTTTTCCCCATCATCTCTTTCCTTTGCTCTTATTTGTATCCGATCTTTGTGCTTCAACACGTGCTTCGCTTACGATTCTTGACAAACGTTTTTTGTTTTTATGTATGGATTAATATTTATTTAATATAATAAATTGGTTAAATTAAT	miR-58.1/80/81/82
